# Supplementary material for: Simple and efficient profiling of transcription initiation and transcript levels with STRIPE-seq
Source: HighWire-hosted journal article supplement (doi:10.1101/gr.261545.120), 2020-06-01
Supplement: Supplemental_Material.docx [file Supplemental_Material.docx]

Supplemental material for

**Simple and efficient profiling of transcription initiation and transcript levels with STRIPE-seq**

Robert A. Policastro1, R. Taylor Raborn1,4, Volker P. Brendel1,2, Gabriel E. Zentner1,3*

1Department of Biology, Indiana University, Bloomington, IN 47405, USA

2Department of Computer Science, Indiana University, Bloomington, IN 47405, USA

3Indiana University Melvin and Bren Simon Cancer Center, Indianapolis, IN 46202, USA

*Corresponding author, [gzentner@indiana.edu](mailto:gzentner@indiana.edu)

4Present address: The Biodesign Institute Center for Mechanisms of Evolution, Arizona State University, Tempe, AZ 85287, USA

Contents:

Supplemental Results

Supplemental Methods

Supplemental Figures S1-S25

Supplemental References

**Supplemental Results**

**Design of STRIPE-seq oligos**

The RTOs consist of a 5-nt random sequence to facilitate random priming within transcripts followed by the full-length Illumina TruSeq P7 barcode adapter (Supplemental Figure S2). The barcode was included in the RTOs rather than the TSO, where it was included in RAMPAGE (Batut et al. 2013), to facilitate standard Illumina demultiplexing. Shorter TSOs have also been shown to promote more efficient TSRT (Zajac et al. 2014).

We designed the TSO, the core of which is the Illumina TruSeq P5 Universal Adapter, with several features to address potential sources of bias (Supplemental Figure S2). First, a random 8-nt unique molecular identifier (UMI) (Kivioja et al. 2011) is positioned downstream of the P5 primer binding site. The positioning of the UMI immediately downstream of the P5 primer binding site partially addresses the low-diversity problem of Illumina sequencing, in which samples with homogenous 5’ nucleotide compositions display reduced cluster detection and subsequent loss of information (Krueger et al. 2011; Mitra et al. 2015). Furthermore, while all the data presented here were obtained with paired-end sequencing, the UMI could also be used for computational detection and removal of PCR duplicates, facilitating more accurate TSR quantification with single-end sequencing. Immediately downstream of the UMI, we placed a 4-nt spacer (TATA), which has been shown to suppress TSO invasion (*i*.*e*., annealing of the TSO to a poly-C tract in an incompletely reverse-transcribed first strand cDNA molecule) (Tang et al. 2013). We did not replace the 3’-most riboguanosine residue of the TSO with a locked nucleic acid guanylate residue as was done in Smart-seq2 because, while this substitution can increase cDNA yield (Picelli et al. 2013), it also increases strand invasion artifacts (Harbers et al. 2013). We also modified the 5’-end of the TSO with biotin to prevent the formation of large quantities of TSO concatemers that severely reduce library complexity, caused by secondary TS events that occur when reverse transcriptase reaches the end of the initial TSO (Kapteyn et al. 2010; Turchinovich et al. 2014).

**Processing of STRIPE-seq data**

Read quality was assessed and adapter sequences were trimmed. We subsequently removed reads mapping to rRNA. We observed levels of rRNA contamination ranging from 29-33% for 50 ng samples, 44.4-49.7% for 100 ng samples, and 51.8-59.3% for 250 ng samples (Supplemental Table S1). Lastly, we discarded 5’ reads without the UMI-TATAGGG sequence and trimmed it from remaining reads prior to alignment. After alignment, 92.8-95.3% of reads uniquely mapped to the genome. Aligned reads were then subjected to further quality control. First, duplicate reads, reads missing mate pairs, and non-primary alignment reads were removed. Only 13.8-55% of uniquely mapped reads qualified as likely independent, unique data points. The prevalence of PCR duplicates greatly decreased as input increased from 50 to 250 ng of total RNA, suggesting low RNA input as a limiting factor in library complexity relative to TSRT efficiency. To also assess the potential contribution of over-sequencing to the prevalence of PCR duplicates, we performed saturation analysis to computationally infer library complexity. With all methods analyzed, diminishing returns were observed above ~1.5-2 million mappable fragments (sequenced fragments that can be mapped to the genome following computational removal of reads corresponding to rRNA), suggesting over-sequencing of STRIPE-seq libraries (Supplemental Figure S5). Furthermore, library complexity increased as RNA input increased in STRIPE-seq, further indicating that total RNA input is a limiting factor in library complexity, presumably due to the efficiency of TSRT (Wulf et al. 2019). A caveat to this analysis is that duplicate removal in SLIC-CAGE and nanoCAGE samples was not possible, making accurate determinations of library complexity difficult for those samples. After initial filtering of the alignments, we further cleaned the data by removal of read pairs with more than 3 soft-clipped bases adjacent to the presumed TSS, as prior *in vivo* and *in vitro* studies showed that the addition of more than 3 bases by the terminal transferase activity of RT was rare (Wulf et al. 2019). We allowed for the potential presence of introns in our data by accepting any read pairs containing a read with a within-read gap between 50 and 1,000 nt as well as a maximum TLEN of 1,500. A within-read gap would indicate that a transcript body read spanned an exon-exon junction and is thus ‘split’ when aligned to the intron-containing genome. TLEN is the template length, or the distance between the ends of the paired reads when mapped back to the genome. A large TLEN would thus be indicative of a cDNA fragment containing an exon-exon junction between the two sequenced ends. For yeast, these parameters would retain all legitimate fragments except those aligning to the largest yeast intron *(DBP2*, at 1,002 nt). Only a few thousand reads per sample were removed during these final scrubbing steps (Supplemental Table S1).

For cleaning of human STRIPE-seq datasets, we used a within-read gap range of 50 to 100,000 nt and an upper TLEN limit of 100,500. These parameters retain fragments that align to the vast majority of human introns. Processing of human reads with GoSTRIPES revealed variable levels of rRNA reads ranging from 20.5-22.7% (Supplemental Table 1). We obtained proportions of uniquely mapped reads from 89.3-92.8%, though only 16.3-29.5% reads were considered to be unique after duplicate removal.

**Supplemental Methods**

**STRIPE-seq library construction**

***TEX treatment of total RNA***

For TEX digestion, 50, 100, or 250 ng total RNA (≥ 25 ng/μL) was combined with 0.2 μL Terminator Reaction Buffer A (10×), 0.1 μL TEX (1 U/μL; Lucigen) and H2O to 2.0 μL. The reaction was then incubated at 30**°**C for 1 h. EDTA inhibits TEX and should thus be excluded from the RNA storage buffer. Due to the small volumes involved, we recommend making a master mix sufficient for the desired number of samples. We also note a higher proportion of rRNA reads in the 100 ng and especially the 250 ng samples, and thus suggest using 0.2 μL of TEX above 100 ng of RNA input.

***Template-switching reverse transcription***

Template-switching reverse transcription (TSRT) was performed as previously described in Smart-seq2 (Picelli et al. 2013) with the following modifications. The initial primer mix was prepared by combining 1 μL RTO (10 μM) with a different barcode per sample (see Supplemental Table 5 for barcode sequences, as well as <https://github.com/rpolicastro/barcode-generator> or Supplemental Code for a barcode generation script used here), 0.5 μL dNTP mix (10 mM each dNTP), and 1.5 μL of a mixture of sorbitol (3.3 M) and trehalose (0.66 M) prepared as previously described (Batut and Gingeras 2013). The 2 μL TEX digestion was added to the primer mix, and the solution was incubated at 65**°**C for 5 min, 4**°**C for 2 min and then immediately placed on ice. 5 μL of a reverse transcription master mix containing 2 μL SuperScript II First Strand Buffer (5×), 0.5 μL DTT (0.1 M), 2 μL betaine (5 M), and 0.5 μL (100 U) SuperScript II reverse transcriptase (200 U/μL; Invitrogen) was added to the RNA mixture. For reverse transcription (RT), the sample was incubated at 25**°**C for 10 min and 42**°**C for 5 min. 0.25 μL of TSO (400 μM) was added to the reactions while still in the heat block and then mixed thoroughly by pipetting. The reaction was completed with a 25 min incubation at 42**°**C and a 10 min incubation at 70**°**C. cDNA was purified using 8 μL of RNAclean XP beads (0.8:1 beads:sample ratio; Beckman Coulter) according to the manufacturer’s protocol. For both this and subsequent cleanup steps, AMPure XP (Beckman Coulter) or analogous SPRI bead preparations may be substituted to save on costs. First-strand cDNA was eluted in 12 μL nuclease-free H2O.

***Second-strand cDNA synthesis/library PCR***

Second-strand cDNA synthesis and library amplification was performed by combining 11 μL eluted first-strand cDNA with 12.5 μL of KAPA HiFi HotStart ReadyMix (2×; Kapa Biosystems, Inc.) and 0.75 μL each of the forward (10 μM) and reverse (10 μM) STRIPE-seq library oligos for a total reaction volume of 25 μL. The PCR mixture was thermal cycled using the following program: 95**°**C for 3 min, 16-20 cycles of 98**°**C for 20 s, 63**°**C for 15 s, and 72**°**C for 45 s, and a final extension at 72**°**C for 2 min. A two-step size selection was then performed. First, to remove small fragments, 16.3 μL RNAClean XP beads were added (0.652 beads:sample ratio) and cDNA was purified according to the manufacturer’s protocol. cDNA was eluted in 17 μL nuclease-free H2O. To remove large fragments, 15 μL of the previous eluted cDNA were transferred to a new tube, 8.3 μL RNAClean XP beads were added (0.553:1 beads:sample ratio), and the bead/sample mixture was incubated at room temperature for 10 min. Beads were collected on a magnetic rack for 10 min and 22 μL supernatant was transferred to a new tube. To isolate the final cleaned cDNA library, 22 μL RNAClean XP beads (1:1 beads:sample ratio) were added and purification was completed as per the manufacturer’s protocol. The final library was eluted in 16 μL nuclease-free H2O and 15 μL was transferred to a new tube.Typical yields from the STRIPE-seq library protocol ranged from 25 to 100 ng of total library with a size distribution from 200-1000 bp as analyzed on an Agilent 2200 TapeStation instrument using a High Sensitivity D5000 ScreenTape device (Agilent Technologies).

**Sequencing of STRIPE-seq Libraries**

Libraries were pooled by molarity based on quantification of fragments between 180-900 bp as determined by TapeStation analysis. An additional round of RNAClean XP size selection (1:1 beads:sample ratio) was performed on the pooled library as needed to remove any residual putative primer-dimers ≤150 bp. Pooled libraries were denatured following the standard NextSeq procedure using a 1 nM initial library concentration. Note that, due to the homogeneity present in the TSO following the UMI (TATAGGG), a modest proportion of a STRIPE-seq run (20-30%) should be composed of more random sequences in the form of a spike-in such as PhiX or another type of library such as RNA-seq or ChIP-seq. We note that this caveat only applies to newer Illumina platforms (e.g. NextSeq and NovaSeq) using two-color chemistry, wherein G nucleotides are represented as the absence of color, thus leading to poor cluster acquisition and potential run failure when the TATAGGG sequence in the adapter is reached. This problem is less pronounced on four-color Illumina platforms (e.g. HiSeq and MiSeq) and so in these cases the proportion of spike-in and/or other library types can be decreased to 10-15%.

**Data analysis**

***STRIPE-seq***

Read processing and alignment

STRIPE-seq read files were processed and aligned to the respective genomes using the GoSTRIPES workflow (<https://github.com/BrendelGroup/GoSTRIPES> and Supplemental Code). The workflow is implemented as a GNU Make (<https://www.gnu.org/software/make/>) file, consisting of a section that defines program parameters, rules that define intermediate and final target outputs, and recipes for creating the targets. GoSTRIPES performs the following steps (shown as a dependency graph in Supplemental Figure S4):

1. (Optional) Analysis of read quality (FastQC (Andrews 2010))
2. Trimming of adapter sequences (Trimmomatic (Bolger et al. 2014))
3. Removal of reads mapping to rRNA species (TagDust2 (Lassmann 2015))
4. Selection of reads with the UMI-TATAGGG sequence (*selectReadsByPattern.pl*)
5. Addition of UMI sequence to read name, to facilitate PCR duplicate removal in single-end sequencing if necessary (UMI-tools (Smith et al. 2017))
6. Trimming of adapter and TATAGGG sequences (Cutadapt (Martin 2011))
7. Rescue of a few remaining reads with reliable detection of template switching chaining (*selectReadsByPattern.pl*)
8. (Optional) Analysis of processed read quality post cleanup (FastQC (Andrews 2010))
9. Alignment to reference genome (STAR (Dobin et al. 2013))
10. Removal of duplicate reads based on matching R1 and R2 read positions for paired-end samples (SAMtools) (Li et al. 2009). For single-end sequencing, the UMI previously stored in the read name may be used to remove PCR duplicates.
11. Scrubbing of aligned reads to remove reads with excessive soft clipping, very short or very long within-read gaps, and pairs with excessively long template lengths (*scrubSAMfile.pl*)

All programs and dependencies required to complete this workflow are available in the GoSTRIPES Singularity (Kurtzer et al. 2017) which can be downloaded from Singularity Hub (Sochat et al. 2017) (<https://www.singularity-hub.org/collections/1990>). Parameter settings used are accessible as described in the next section.

Identification of TSSs and TSRs

Starting from the alignments of GoSTRIPES-processed STRIPE-seq libraries in BAM format, we used the R Bioconductor package TSRchitect (<https://bioconductor.org/packages/release/bioc/html/TSRchitect.html>) (Raborn et al. 2017) to identify TSSs and cluster them into TSRs. At the conclusion of the analysis with TSRchitect we exported TSS and TSR datasets to text-delimited files, including BED format. The output of TSRchitect can also be used with the new Bioconductor package CAGEfightR (Thodberg et al. 2019) for analyses not described here, such as discovery and association of putative enhancers with target genes. As with GoSTRIPES, the TSRchitect package with all its dependencies can be run via Singularity, which greatly facilitates reproducibility on any UNIX-based system. The entirety of our workflows consisting of GoSTRIPES-enabled read processing and alignment and TSRchitect-enabled identification of TSSs and TSRs are documented for both the yeast and human data at our Github site TSRbuild (<https://github.com/BrendelGroup/TSRbuild>) and as Supplemental Code. With just a few minor edits to configuration scripts, a reader will be able to reproduce all of the data analysis work from this paper. Moreover, the provided scripts can easily be modified to allow analysis of other TSS data sets, independent of the methodology used.

Downstream analysis

To facilitate straightforward and reproducible downstream analysis of STRIPE-seq data, we developed a series of integrated scripts that will form the basis of an R package, TSRexploreR (manuscript in preparation). In this paper, TSRexploreR was used to explore TSS read thresholds, determine the genomic distributions of TSSs, assess TSS and TSR correlation between samples, determine TSS density relative to annotated start codons and promoters, analyze the sequence context of TSSs, perform differential TSR and expression analysis, and perform Gene Ontology (GO) analysis. The version of TSRexploreR used here is available at [https://github.com/zentnerlab/STRIPE-seq](https://github.com/zentnerlab/stripeseq) and as Supplemental Code. For analysis of yeast samples, we used the Ensembl 98 R64-1-1 yeast genome sequence (Saccharomyces_cerevisiae.R64-1-1.dna.toplevel.fa) and annotation file (Saccharomyces_cerevisiae.R64-1-1.98.gtf). For analysis of K562 samples, we used the Ensembl 98 GRCh38.p13 soft-masked human genome sequence (Homo_sapiens.GRCh38.dna_sm.primary_assembly.fa) and annotation file (Homo_sapiens.GRCh38.98.chr.gtf). Scripts used to automate TSRexploreR functions used in this work (*yeast_TSRexploreR.R*, *human_TSR_exploreR.R*) are available at <https://github.com/zentnerlab/STRIPE-seq> and as Supplemental Code. For visualization of TSS mapping data, we used Gviz (Hahne and Ivanek 2016) with custom automation scripts (*yeast_Gviz.R*, *human_Gviz.R*), available at <https://github.com/zentnerlab/STRIPE-seq> and as Supplemental Code.

TSR shape analysis

TSR shape index was calculated according to the previously published formula (Hoskins et al. 2011) in R. Only TSRs with a score ≥ 10 were considered, and only constituent TSSs with ≥ 2 were included in the SI calculation. A SI cutoff of -1 was used to distinguish broad and peaked TSRs. The R script used for SI analysis (*shape_index.R)* is available at [https://github.com/zentnerlab/STRIPE-seq](https://github.com/zentnerlab/stripeseq) and as Supplemental Code.

Promoter correlation analysis

To generate sets of protein-coding gene promoters, we read the GTFs listed above into R as TxDb objects and subjected them to a filtering step. For yeast, we required that the transcript name contain “mRNA” and excluded mitochondrial transcripts, yielding a set of 6,572 transcripts. For human, we required that the transcript name be present in a list of 168,608 protein-coding transcripts obtained from Ensembl and excluded transcripts originating from the Y or mitochondrial chromosomes, yielding a set of 152,701 transcripts. Promoter windows (-250 to +100 for yeast, -500 to +500 for human) were obtained from the corresponding TxDb object and filtered against the lists of mRNA IDs generated above. We then counted the number of TSSs from each sample within each promoter window, normalized counts, and performed Spearman correlation analysis. Scripts used for promoter correlation analysis (*yeast_promoter_correlation.R*, *human_promoter_correlation.R*) are available at <https://github.com/zentnerlab/STRIPE-seq> and as Supplemental Code.

TSS shifting analysis

We assessed shifts in TSS distribution in TSRs using CAGEr according to the supplemental vignette accompanying the original publication (Haberle et al. 2015). Three replicates of 100 ng control and diamide STRIPE-seq were merged for shifting analysis. Default parameters were used for each step of the analysis with the following exceptions. *normalizeTagCount*: alpha = 1.93, T = 1e6; *clusterCTSS*: maxDist = 40, keepSingletonsAbove = 3; *aggregateTagClusters*: tpmThreshold = 3. For the relaxed-stringency set of shifts, *getShiftingPromoters* was run with scoreThreshold = -Inf and fdrThreshold = 1e-10. The R script used for TSS shifting analysis (*shifting.R*) is available at <https://github.com/zentnerlab/STRIPE-seq> and as Supplemental Code.

***RNA-seq***

rRNA reads were first removed from paired-end FASTQ files using TagDust2 (Lassmann 2015) (v2.33.0) with additional settings -fe 3 -dust 97. STAR (Dobin et al. 2013) (v2.7.0e) was then used to generate genome indices (with the additional setting *--genomeSAindexNbases* *10* for yeast) and align reads to the GRCh38.p13 or R64-1-1 genome assemblies for human and yeast data, respectively. Finally, the aligned reads were counted to the nearest overlapping feature using the Subread (Liao et al. 2019) (v1.6.4) function *featureCounts* with the settings *-t exon -g gene_id --minOverlap 10 --largestOverlap -s 2 -p -B*. bigWig files representing RNA-seq coverage were generated with deepTools (Ramírez et al. 2016) (v3.3.0) as follows: bamCoverage *--normalizeUsing CPM -bs 1 --filterRNAstrand [forward or reverse] --smoothLength 25*. RNA-seq libraries were constructed using the deoxy-UTP (dUTP) method, so reads corresponding to positively-stranded transcripts were obtained with *--filterRNAstrand forward*, which excludes positively-stranded reads, as negatively-stranded reads correspond to positively-stranded transcripts in the dUTP protocol. Similarly, reads corresponding to negatively-stranded transcripts were obtained with *--filterRNAstrand reverse*. Reads were not extended so as not to generate coverage of skipped regions (introns). STRIPE-seq fragments in transcripts were counted with Subread featureCounts as above. Differential expression analysis was performed with edgeR (Robinson et al. 2010) as part of TSRexploreR.

***Distal TSR analysis***

Overlap of TSRs with enhancers

TSRs from three K562 100 ng STRIPE-seq replicates were merged to yield a set of 16,745 TSRs and annotated with ChIPseeker (Yu et al. 2015). Only TSRs with signal in all three replicates (n = 7,161) were considered for the ensuing analysis. We considered TSRs < 1 kb from an annotated TSS to be proximal and TSRs ≥ 1 kb from a TSS to be distal. A set of 43,148 K562 enhancer annotations (using hg19 coordinates) was obtained from EnhancerAtlas 2.0 (Gao and Qian 2019) and converted to hg38 coordinates with UCSC liftOver, yielding a set of 43,119 enhancers. Proximal and distal TSRs were then overlapped with enhancer coordinates and counted. Proportions of proximal and distal TSRs overlapping enhancers were compared using Pearson’s chi-squared test. The script used for this analysis (*distal_TSR_analysis.R*) is available at <https://github.com/zentnerlab/STRIPE-seq> and as Supplemental Code. To enable display of enhancer annotations in Gviz, chromosome names were converted from UCSC to Ensembl format (i.e. chr1 to 1) with sed ‘/s/chr//g’, as we used Ensembl genome sequences and annotations for STRIPE-seq analysis.

Analysis of TSS signal at distal TSRs

CPM-normalized TSS bedGraphs were converted to bigWigs with UCSC bedGraphToBigWig to enable compatibility with deepTools (Ramírez et al. 2016) v3.3.0. Signal around TSR midpoints was then determined with deepTools *computeMatrix* and heatmaps were generated with the deepTools function *plotHeatmap*, sorting all heatmaps descending by mean STRIPE-seq minus strand signal. The nearly exact splitting of the heatmap into plus and minus strand signal likely arises from the fact that most TSRs only display signal on one strand in each method at these TSRs.

Analysis of histone modifications at distal TSRs

K562 CUT&Tag datasets (Kaya-Okur et al. 2019) were downloaded from NCBI SRA, converted to FASTQ format with fastq-dump (Leinonen et al. 2010), and aligned to the GRCh38 and Ensembl EB1 (*E. coli*) genome assemblies with Bowtie2 (Langmead and Salzberg 2012) v2.3.5 with default parameters plus *-I 10 -X 700 --no-unal --no-discordant --no-mixed --dovetail*. Replicate BAM files were merged with SAMtools and a normalization factor corresponding to (1,000/number of fragments mapped to EB1) was calculated for each sample. Spike-in-normalized bigWig signal tracks were generated with deepTools *bamCoverage* with the *--scaleFactor* flag set to the appropriate normalization factor and *-bs 25 -e* to set the resolution to 25 bp and extend reads to their paired-end fragment length. Signal around TSR midpoints was then determined with deepTools *computeMatrix* and plotted as heatmaps with deepTools *plotHeatmap*, sorting all heatmaps in descending order by mean H3K4me1 signal. For the purpose of displaying CUT&Tag bigWig files with Gviz, chromosome names were converted from UCSC to Ensembl format using *convertBigWigChroms.py* (<https://gist.github.com/dpryan79>) with the *GRCh38_UCSC2ensembl* conversion file (<https://github.com/dpryan79/ChromosomeMappings>). Scripts used for generation of TSS and CUT&Tag bigWigs (*bedgraphtobigwig.sh*, *merge_ecoli.sh*, *merge_human.sh*) and heatmaps (*distal_TSR_heatmaps.sh*) are available at <https://github.com/zentnerlab/STRIPE-seq> and as Supplemental Code.

**Supplemental Figure S1. Steps taken to mitigate drawbacks of current TSRT-based TSS profiling methods**

1. During TSRT, the TSO can hybridize to poly(C) stretches in the nascent cDNA transcript (TSO invasion), leading to artifactual TSSs within gene bodies. Addition of the TSO 5 minutes into the reaction ensures that a majority of cDNA transcripts are fully extended to help suppress this artifact. 2) The TSO can also act as a primer, annealing to CCC sequences in RNA molecules. This is also suppressed by later addition of the TSO to the TSRT reaction.3) Additional TSOs can hybridize to a CCC tract added to the end of the first TSO by reverse transcriptase. This phenomenon is reduced by modification of the 5’ end of the TSO with a biotin moiety. 4) TSRT produces a wide range of cDNA sizes, with very large and very small molecules incompatible with Illumina sequencing. Tagmentation with Tn5 transposase is frequently used to optimize library size, but requires an additional PCR step. In STRIPE-seq, SPRI bead-based size selection is used to optimize library size. 5) On Illumina sequencers that use two-color chemistry (e.g. NextSeq, NovaSeq), G is represented as the absence of color. The homogeneity inherent to the TSO (TATAGGG) can lead to reduced cluster acquisition and loss of data. To improve sequence diversity, the STRIPE-seq TSO has an 8-nt unique molecular identified (UMI) as the first 8 bases sequenced. 6) The presence of the UMI also allows for removal of PCR duplicates when single-end sequencing is used, providing more accurate quantification of TSSs.

**Supplemental Figure S2. Design of the STRIPE-seq TSO and RTO**

**Supplemental Figure S3. TapeStation analysis of STRIPE-seq libraries**

Shown are representative results for libraries constructed with 50, 100, and 250 ng of control yeast total RNA, 100 ng diamide-treated yeast total RNA, 100 ng K562 total RNA, no RNA input with the indicated number of PCR cycles, and pooled libraries before and after a mild bead cleanup (1:1 beads:sample ratio) to remove oligo dimers. Note that the trace shown for the pre-cleanup pool is for the 9 untreated yeast samples, while the trace shown for the post-cleanup pool is for these 9 samples plus 9 additional yeast samples sequenced for testing purposes but not presented here. Unpooled libraries were run on HSD5000 ScreenTapes and pooled libraries were run on HSD1000 ScreenTapes.

**Supplemental Figure S4. Dependency map of the GoSTRIPES computational workflow**

**Supplemental Figure S5. Sequencing saturation analysis of yeast TSS mapping datasets**

Analysis of sequencing saturation in STRIPE-seq, SLIC-CAGE, nanoCAGE. rRNA was computationally removed from FASTQ files, and then reads were aligned to the yeast R64-1-1 genome assembly. The given numbers of mappable reads were sampled from the BAMs, PCR duplicates were removed from STRIPE-seq samples, and only primary alignments with properly paired mates were retained. TSSs were then called using TSRchitect and annotated using ChIPseeker. Note that PCR duplicates could not be removed from SLIC-CAGE and nanoCAGE samples because the FASTQ files were single-end and, in the case of nanoCAGE, deposited with the UMI removed.

**Supplemental Figure S6. Threshold analysis of all yeast STRIPE-seq samples**

As in Figure 2A, plots show the fraction of unique TSSs that is promoter-proximal (-250 to +100 bp relative to an annotated start codon) at the indicated read threshold for each sample. Dot color indicates the number of genes with a promoter-proximal TSS.

**Supplemental Figure S7. Genomic distribution of yeast TSSs identified by STRIPE-seq**


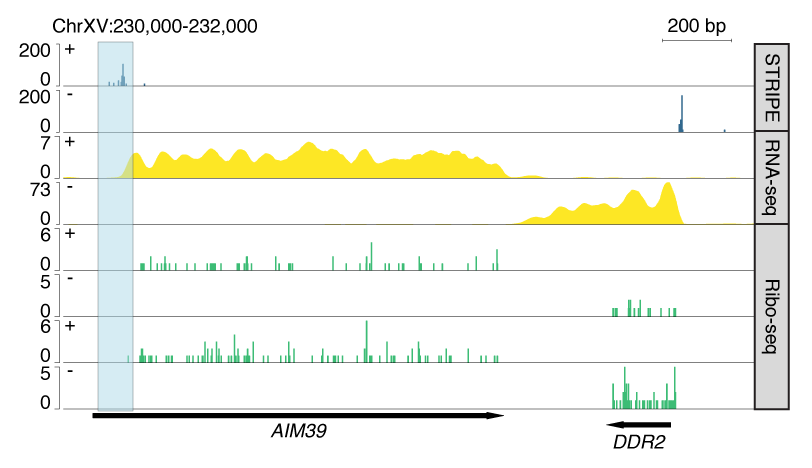


**Supplemental Figure S8. Analysis of ribosome profiling at *AIM39***

Genome browser-style tracks showing CPM-normalized STRIPE-seq and poly(A)+ RNA-seq as well as two replicates of Ribo-seq signal at the *AIM39* locus. STRIPE-seq signal (highlighted in blue) is upstream of the start of the RNA-seq signal, which in turn is upstream of the start of the Ribo-seq signal, strongly suggesting misannotation of the *AIM39* start codon.

**Supplemental Figure S9. Sequence logos for yeast TSSs identified by STRIPE-seq**

**Supplemental Figure S10. Dinucleotide frequencies at yeast TSSs identified by STRIPE-seq**

Dinucleotides are in descending order based on their average frequency across all samples.

**Supplemental Figure S11. Analysis of soft-clipped base prevalence in yeast TSS mapping datasets**

Bar charts showing the frequencies of STRIPE-seq, SLIC-CAGE, and nanoCAGE R1 reads with the given number of soft-clipped bases extending upstream from the called TSS. Reads with more than 3 soft clipped-bases were infrequent in all methods and were thus not analyzed further.

**Supplemental Figure S12. Sequence distribution of TSS-adjacent soft-clipped bases in yeast TSS mapping datasets**

Bar charts showing the frequencies of soft-clipped bases in STRIPE-seq, SLIC-CAGE, and nanoCAGE at the position directly upstream of the called TSSs. Bases displayed are relative to the first-strand cDNA.

**Supplemental Figure S13. Threshold analysis of yeast STRIPE-seq, SLIC-CAGE, and nanoCAGE datasets**

As in Figure 2A, plots show the fraction of unique TSSs that is promoter-proximal (-250 to +100 bp relative to an annotated start codon) at the indicated read threshold for each sample. Dot color indicates the number of genes with a promoter-proximal TSS.

**Supplemental Figure S14. Dinucleotide frequencies at yeast TSSs identified by STRIPE-seq, SLIC-CAGE, and nanoCAGE**

Dinucleotides are in descending order based on their average frequency across all samples.

**Supplemental Figure S15. Yeast TSR shape analysis**

Violin plots of shape index (SI) values for TSRs with scores ≥ 10 detected in each replicate of each method indicated. The dashed line indicates a SI of -1, used as the cutoff to distinguish broad and peaked TSRs.

**Supplemental Figure S16. Correlation of yeast control and diamide STRIPE-seq and RNA-seq signal**

STRIPE-seq and RNA-seq fragments within transcripts were counted, compared by Spearman correlation analysis, and plotted as a hierarchically clustered heatmap.

**Supplemental Figure S17. GO biological process analysis of DEGs in STRIPE-seq and RNA-seq data for control and diamide-treated yeast**

**Supplemental Figure S18. Sequencing saturation analysis of K562 TSS mapping datasets**

Analysis of sequencing saturation in STRIPE-seq, RAMPAGE, CAGE, and nanoCAGE-XL datasets. rRNA was computationally removed from FASTQ files and reads were aligned to the human GRCh38.p13 genome assembly. The given numbers of mappable reads were sampled from the BAMs, PCR duplicates were removed, and only primary alignments with properly paired mates were retained. TSSs were then called using TSRchitect and annotated using ChIPseeker.

**Supplemental Figure S19. Genomic context analysis of K562 TSSs detected by STRIPE-seq**

(A) Genomic distribution of K562 TSSs identified by STRIPE-seq. (B) Sequence logos for K562 TSSs identified by STRIPE-seq. (C) Dinucleotide frequencies at K562 TSSs identified by STRIPE-seq. Dinucleotides are in descending order based on their average frequency across all samples.

**Supplemental Figure S20. Analysis of soft-clipped base prevalence in human TSS mapping datasets**

Bar charts showing the frequencies of STRIPE-seq, CAGE, RAMPAGE, and nanoCAGE-XL R1 reads with the given number of soft-clipped bases extending upstream from the called TSS. Reads with more than 3 soft clipped-bases were infrequent in all methods and were thus not analyzed further.

**Supplemental Figure S21. Sequence distribution of TSS-adjacent soft-clipped bases in human TSS mapping datasets**

Bar charts showing the frequencies of soft-clipped bases in STRIPE-seq, CAGE, RAMPAGE, and nanoCAGE-XL at the position directly upstream of the called TSSs. Bases displayed are relative to the first-strand cDNA.

**Supplemental Figure S22. Comparison of K562 STRIPE-seq and RNA-seq transcript abundance measurements**

STRIPE-seq and RNA-seq fragments within transcripts were counted, compared by Spearman correlation analysis, and plotted as a hierarchically clustered heatmap.

**Supplemental Figure S23. Human TSR shape analysis**

Violin plots of shape index (SI) values for TSRs with a score ≥ 10 detected in each replicate of each method indicated. The dashed line indicates a SI of -1, used as the cutoff to distinguish broad and peaked TSRs.

**Supplemental Figure S24. Analysis of K562 distal TSRs**

(A) Heatmaps of CPM-normalized STRIPE-seq, CAGE, RAMPAGE, and nanoCAGE-XL signal at 513 distal (≥ 1 kb from an annotated TSS) TSRs detected in all three K562 STRIPE-seq replicates. Replicate 1 is shown for all data types. (B) Heatmaps of spike-in-normalized H3K4me1/2/3, H3K27ac, and IgG control CUT&Tag signal at distal K562 TSRs. Heatmaps are sorted descending by average H3K4me1 signal. (C) Genome browser-style tracks showing CPM-normalized replicate 1 STRIPE-seq, CAGE, RAMPAGE, and nanoCAGE-XL signal, spike-in-normalized H3K4me1/2/3, H3K27ac, and IgG control CUT&Tag signal, and EnhancerAtlas 2.0 K562 enhancer annotations at two regions of the human genome.

**Supplemental Figure S25. Cost and time comparison of TSS mapping methods**

A summary of the time and cost analysis of TSS mapping methods presented in Supplemental Table S4.

**Supplemental References**

Andrews S. 2010. FastQC: A quality control tool for high throughput sequence data. *Available online at:* <http://wwwbioinformaticsbabrahamacuk/projects/fastqc>.

Batut P, Dobin A, Plessy C, Carninci P, Gingeras TR. 2013. High-fidelity promoter profiling reveals widespread alternative promoter usage and transposon-driven developmental gene expression. *Genome Res* **23**: 169-180.

Batut P, Gingeras TR. 2013. RAMPAGE: Promoter Activity Profiling by Paired-End Sequencing of 5′-Complete cDNAs. *Curr Protoc Mol Biol* **104**: 25B.11.21-25B.11.16.

Bolger AM, Lohse M, Usadel B. 2014. Trimmomatic: a flexible trimmer for Illumina sequence data. *Bioinformatics* **30**: 2114-2120.

Dobin A, Davis CA, Schlesinger F, Drenkow J, Zaleski C, Jha S, Batut P, Chaisson M, Gingeras TR. 2013. STAR: ultrafast universal RNA-seq aligner. *Bioinformatics* **29**: 15-21.

Gao T, Qian J. 2019. EnhancerAtlas 2.0: an updated resource with enhancer annotation in 586 tissue/cell types across nine species. *Nucleic Acids Res* **48**: D58-D64.

Haberle V, Forrest ARR, Hayashizaki Y, Carninci P, Lenhard B. 2015. CAGEr: precise TSS data retrieval and high-resolution promoterome mining for integrative analyses. *Nucleic Acids Res* **43**: e51-e51.

Hahne F, Ivanek R. 2016. Visualizing Genomic Data Using Gviz and Bioconductor. In *Statistical Genomics: Methods and Protocols*, doi:10.1007/978-1-4939-3578-9_16 (ed. E Mathé, S Davis), pp. 335-351. Springer New York, New York, NY.

Harbers M, Kato S, de Hoon M, Hayashizaki Y, Carninci P, Plessy C. 2013. Comparison of RNA- or LNA-hybrid oligonucleotides in template-switching reactions for high-speed sequencing library preparation. *BMC Genomics* **14**: 665.

Hoskins RA, Landolin JM, Brown JB, Sandler JE, Takahashi H, Lassmann T, Yu C, Booth BW, Zhang D, Wan KH et al. 2011. Genome-wide analysis of promoter architecture in Drosophila melanogaster. *Genome Res* **21**: 182-192.

Kapteyn J, He R, McDowell ET, Gang DR. 2010. Incorporation of non-natural nucleotides into template-switching oligonucleotides reduces background and improves cDNA synthesis from very small RNA samples. *BMC Genomics* **11**: 413-413.

Kaya-Okur HS, Wu SJ, Codomo CA, Pledger ES, Bryson TD, Henikoff JG, Ahmad K, Henikoff S. 2019. CUT&Tag for efficient epigenomic profiling of small samples and single cells. *Nature Communications* **10**: 1930.

Kivioja T, Vähärautio A, Karlsson K, Bonke M, Enge M, Linnarsson S, Taipale J. 2011. Counting absolute numbers of molecules using unique molecular identifiers. *Nat Methods* **9**: 72.

Krueger F, Andrews SR, Osborne CS. 2011. Large Scale Loss of Data in Low-Diversity Illumina Sequencing Libraries Can Be Recovered by Deferred Cluster Calling. *PLOS ONE* **6**: e16607.

Kurtzer GM, Sochat V, Bauer MW. 2017. Singularity: Scientific containers for mobility of compute. *PLOS ONE* **12**: e0177459.

Langmead B, Salzberg SL. 2012. Fast gapped-read alignment with Bowtie 2. *Nat Methods* **9**: 357-359.

Lassmann T. 2015. TagDust2: a generic method to extract reads from sequencing data. *BMC Bioinformatics* **16**: 24.

Leinonen R, Sugawara H, Shumway M, Collaboration obotINSD. 2010. The Sequence Read Archive. *Nucleic Acids Res* **39**: D19-D21.

Li H, Handsaker B, Wysoker A, Fennell T, Ruan J, Homer N, Marth G, Abecasis G, Durbin R, Genome Project Data Processing S. 2009. The Sequence Alignment/Map format and SAMtools. *Bioinformatics* **25**: 2078-2079.

Liao Y, Smyth GK, Shi W. 2019. The R package Rsubread is easier, faster, cheaper and better for alignment and quantification of RNA sequencing reads. *Nucleic Acids Res* **47**: e47-e47.

Martin M. 2011. Cutadapt removes adapter sequences from high-throughput sequencing reads. *EMBnetjournal* **17**: 3.

Mitra A, Skrzypczak M, Ginalski K, Rowicka M. 2015. Strategies for achieving high sequencing accuracy for low diversity samples and avoiding sample bleeding using illumina platform. *PLOS ONE* **10**: e0120520-e0120520.

Picelli S, Björklund ÅK, Faridani OR, Sagasser S, Winberg G, Sandberg R. 2013. Smart-seq2 for sensitive full-length transcriptome profiling in single cells. *Nat Methods* **10**: 1096.

Raborn RT, Sridharan K, Brendel VP. 2017. TSRchitect: Promoter identification from large-scale TSS profiling data. <https://doiorg/doi:1018129/B9biocTSRchitect>.

Ramírez F, Ryan DP, Grüning B, Bhardwaj V, Kilpert F, Richter AS, Heyne S, Dündar F, Manke T. 2016. deepTools2: a next generation web server for deep-sequencing data analysis. *Nucleic Acids Res* **44**: W160-W165.

Robinson MD, McCarthy DJ, Smyth GK. 2010. edgeR: a Bioconductor package for differential expression analysis of digital gene expression data. *Bioinformatics* **26**: 139-140.

Smith TS, Heger A, Sudbery I. 2017. UMI-tools: Modelling sequencing errors in Unique Molecular Identifiers to improve quantification accuracy. *Genome Res* doi:10.1101/gr.209601.116.

Sochat VV, Prybol CJ, Kurtzer GM. 2017. Enhancing reproducibility in scientific computing: Metrics and registry for Singularity containers. *PLOS ONE* **12**: e0188511.

Tang DTP, Plessy C, Salimullah M, Suzuki AM, Calligaris R, Gustincich S, Carninci P. 2013. Suppression of artifacts and barcode bias in high-throughput transcriptome analyses utilizing template switching. *Nucleic Acids Res* **41**: e44-e44.

Thodberg M, Thieffry A, Vitting-Seerup K, Andersson R, Sandelin A. 2019. CAGEfightR: analysis of 5′-end data using R/Bioconductor. *BMC Bioinformatics* **20**: 487.

Turchinovich A, Surowy H, Serva A, Zapatka M, Lichter P, Burwinkel B. 2014. Capture and Amplification by Tailing and Switching (CATS): An ultrasensitive ligation-independent method for generation of DNA libraries for deep sequencing from picogram amounts of DNA and RNA. *RNA Biol* **11**: 817-828.

Wulf MG, Maguire S, Humbert P, Dai N, Bei Y, Nichols NM, Corrêa IR, Guan S. 2019. Non-templated addition and template switching by Moloney murine leukemia virus (MMLV)-based reverse transcriptases co-occur and compete with each other. *J Biol Chem* **294**: 18220-18231.

Yu G, Wang L-G, He Q-Y. 2015. ChIPseeker: an R/Bioconductor package for ChIP peak annotation, comparison and visualization. *Bioinformatics* **31**: 2382-2383.

Zajac P, Islam S, Hochgerner H, Lönnerberg P, Linnarsson S. 2014. Base Preferences in Non-Templated Nucleotide Incorporation by MMLV-Derived Reverse Transcriptases. *PLOS ONE* **8**: e85270.
