# Supplementary material for: Simple and efficient profiling of transcription initiation and transcript levels with STRIPE-seq
Source: HighWire-hosted journal article supplement (doi:10.1101/gr.261545.120), 2020-06-01
Supplement: Supplemental_protocol.pdf [file Supplemental_protocol.pdf]

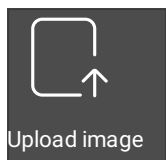

Upload image

Version 3

Mar 23, 2020

# STRIPE-seq library construction V.3

Robert PolICASTRO<sup>1</sup>, Gabe Zentner<sup>1</sup><sup>1</sup>Indiana University

1

Works for me

dx.doi.org/10.17504/protocols.io.bdtri6m6

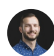Gabe Zentner  
Indiana University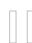

## ABSTRACT

Accurate mapping of transcription start sites (TSSs) is key for understanding transcriptional regulation; however, current protocols for genome-wide TSS profiling are laborious and expensive. We present Survey of TRanscription Initiation at Promoter Elements with high-throughput sequencing (STRIPE-seq), a simple, rapid, and cost-effective protocol for sequencing capped RNA 5' ends from as little as 50 ng total RNA. Including depletion of uncapped RNA and bead cleanups, a STRIPE-seq library can be constructed in approximately 5 hours.

## DOI

dx.doi.org/10.17504/protocols.io.bdtri6m6

## PROTOCOL CITATION

Robert PolICASTRO, Gabe Zentner 2020. STRIPE-seq library construction. **protocols.io**  
dx.doi.org/10.17504/protocols.io.bdtri6m6

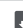

## KEYWORDS

TSS, transcription, transcription start site

## LICENSE

————— This is an open access protocol distributed under the terms of the [Creative Commons Attribution License](https://creativecommons.org/licenses/by/4.0/), which permits unrestricted use, distribution, and reproduction in any medium, provided the original author and source are credited

## CREATED

Mar 17, 2020

## LAST MODIFIED

Mar 23, 2020

## PROTOCOL INTEGER ID

34385

## MATERIALS

| NAME                                                         | CATALOG #    | VENDOR                                   |
|--------------------------------------------------------------|--------------|------------------------------------------|
| <a href="#">Terminator 5-Phosphate-Dependent Exonuclease</a> | TER51020     | <a href="#">Lucigen</a>                  |
| <a href="#">RNAClean XP</a>                                  | A63987       | <a href="#">Beckman Coulter</a>          |
| <a href="#">5M Betain</a>                                    | AAJ77507UCR  | <a href="#">Thermo Fisher Scientific</a> |
| <a href="#">KAPA HiFi HotStart ReadyMix</a>                  | KK2601       | <a href="#">Roche</a>                    |
| <a href="#">Sorbitol</a>                                     | DSS23080-500 | <a href="#">Dot Scientific</a>           |
| <a href="#">Trehalose</a>                                    | 0210309705   | <a href="#">MP Biomedicals</a>           |
| <a href="#">dNTPs 10 µM each</a>                             | 97063-232    | <a href="#">VWR Scientific</a>           |
| <a href="#">SuperScript II Reverse Transcriptase</a>         | 18064014     | <a href="#">Thermo Fisher Scientific</a> |
| <a href="#">RNA ScreenTape</a>                               | 5067-5576    | <a href="#">Agilent Technologies</a>     |
| <a href="#">High Sensitivity D5000 ScreenTape</a>            | 5067-5592    | <a href="#">Agilent Technologies</a>     |

## FOLLOWUP

**Citation:** Robert PolICASTRO, Gabe Zentner (03/23/2020). STRIPE-seq library construction. <https://dx.doi.org/10.17504/protocols.io.bdtri6m6>

This is an open access protocol distributed under the terms of the **Creative Commons Attribution License** (<https://creativecommons.org/licenses/by/4.0/>), which permits unrestricted use, distribution, and reproduction in any medium, provided the original author and source are credited

| NAME        | CATALOG # | VENDOR |
|-------------|-----------|--------|
| TapeStation | G2991AA   |        |

#### BEFORE STARTING

Prepare 3.3 M sorbitol/0.66 M trehalose solution as per Batut and Gingeras (PMID 24510412).

1. Add **2 mL RNase-free H<sub>2</sub>O** to a 50 mL tube.
2. Add **8.02 g trehalose** to the tube.
3. Add **3 mL RNase-free H<sub>2</sub>O**.
4. Add **17.8 g sorbitol** to the tube.
5. Add **5.5 mL RNase-free H<sub>2</sub>O**
6. Bring volume to 30 mL with **0 mL RNase-free H<sub>2</sub>O**
7. Transfer to an RNase-free glass bottle and autoclave at 121°C for 30 min.

Store **1.5 mL** aliquots at **Room temperature** protected from light.

#### Prepare Total RNA

- 1 Check RNA quality and concentration on an Agilent TapeStation using a High-Sensitivity RNA ScreenTape. 15m

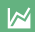

You should have at least 50 to 200 ng of total RNA at a concentration of at least 30 to 125 ng/μl. Your total RNA should also not be highly degraded, as measured by the quality of the rRNA peaks.

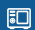

TapeStation

Agilent G2991AA [↗](#)

#### Terminator Exonuclease (TEX) Digestion of Uncapped RNA

- 2 **Prepare TEX Reaction.** TEX preferentially degrades uncapped RNA, thus reducing the amount of rRNA and degraded mRNA fragments in the sample.

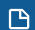

TEX is magnesium-dependent, so ensure that the RNA storage buffer does not contain EDTA.

2.1 Create TEX master mix. Prepare a sufficient volume for the number of reactions to be performed + 1<sup>3m</sup> to account for volume loss during pipetting.

1. **0.2 µl Terminator Exonuclease** .
2. **0.2 µl Terminator Exonuclease Reaction Buffer A** .

Vortex to mix and spin down.

2.2 Prepare TEX reactions in 0.2 mL PCR tubes.

1. **0.4 µl TEX Master Mix**
2. Up to **1.6 µl Total RNA** .
3. Nuclease free water to **2 µl** total reaction volume.

Vortex to mix and spin down.

3 Incubate the TEX reactions in thermal cycler.

1h

1. **30 °C** for **01:00:00** .
2. **4 °C Hold** .

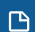

This is a good time to prepare the Reverse Transcription Oligo (RTO) annealing and Template Switching Reverse Transcription (TSRT) reaction mixtures from steps 4.1 and 5.1.

#### Template Switching Reverse Transcription

4 **Anneal reverse transcription oligo (RTO) to RNA.** STRIPE-seq primes reverse transcription via a random pentamer adjacent to the full length TrueSeq R2 adapter (including the barcode) in the RTO.

4.1 Prepare one RTO annealing mix per sample in 0.2 mL PCR tubes.

5m

1. **1.5 µl Sorbitol/Trehalose Solution** .
2. **1 µl Reverse Transcription Oligo (RTO)** [**10 Micromolar (µM)**] . Each sample should have its own unique barcode.
3. **0.5 µl dNTPs** [**10 Millimolar (mM)**] Each .

Vortex to mix and spin down.

4.2 Add **2 µl TEX Reaction** (from step 3) to **3 µl RTO Annealing Mixture** (from step 4.1).<sup>3m</sup>

Vortex to mix and spin down.

4.3 Incubate RTO annealing mixture in thermal cycler.

7m

1. **65 °C** **00:05:00** .
2. **4 °C** **00:02:00** .
3. **4 °C Hold** .

5 **Prepare template switching reverse transcription (TSRT) reactions.** The process of TSRT enriches for the 5' ends of capped RNA in the final library.

- 5.1 Prepare TSRT reaction master mix (per sample). 5m
1. **2 µl Betaine** [M]**5 Molarity (M)** .
  2. **2 µl 5X SuperScript II First Strand Buffer** .
  3. **0.5 µl DTT** [M]**0.1 Molarity (M)** .
  4. **0.5 µl SuperScript II Reverse Transcriptase** .
- Vortex to mix and spin down.

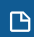

Add reverse transcriptase to master mix just prior to adding to samples.

- 5.2 Add **5 µl TSRT Master Mix** (from step 5.1) into the **5 µl RTO Annealing Reaction** from step 4.3. Vortex to mix and spin down. 3m

## 6 TSRT.

- 6.1 First half of TSRT reaction. 25m
1. **25 °C** **00:10:00** .
  2. **42 °C** **00:05:00** .

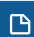

Move on to step 6.2 immediately after the end of step 6.1.

- 6.2 Add TSO. Keep the samples in the thermal cycler while adding the TSO. 3m
1. **0.25 µl TSO** [M]**400 Micromolar (µM)** .
  2. Quickly vortex to mix, spin down, and immediately place tubes back in thermal cycler.

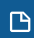

Move on to step 6.3 immediately after end of step 6.2.

- 6.3 Second half of TSRT reaction. 30m
1. **00:25:00** **42 °C** .
  2. **00:10:00** **70 °C** .
  3. **4 °C Hold** .

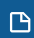

This is a good time to prepare the library PCR master mix in step 8.1.

20m

- 7 Cleanup of TSRT product.
  1. Transfer the TSRT product from step 6.3 into 0.5 mL tube.
  2. Pipette **8 µl RNAClean XP Beads** up and down 10 times into **10 µl TSRT Reaction** from step 6.3.
  3. Incubate for **00:05:00** at **Room temperature**.
  4. Place tubes on magnetic rack and incubate for **00:05:00** at **Room temperature**.
  5. Carefully aspirate supernatant, leaving ~ **2 µl** in tube to avoid sucking up beads.
  6. While tube is still on rack, wash beads with **175 µl 70% Ethanol**, and immediately discard wash without incubation.
  7. Air dry beads for **00:05:00** at **Room temperature**.
  8. Resuspend beads in **12 µl Nuclease Free Water**, and incubate on magnetic rack for **00:01:00** at **Room temperature**.
  9. Transfer **11 µl Supernatant** into new 0.2 mL PCR tubes.

## Library PCR

## 8 Prepare library PCR reaction.

5m

- 8.1 Create library PCR master mix (per sample).
  1. **12.5 µl 2X KAPA HiFi HotStart ReadyMix**.
  2. **0.75 µl Forward Library Oligo (FLO)** **10 Micromolar (µM)**.
  3. **0.75 µl Reverse Library Oligo (RLO)** **10 Micromolar (µM)**.
 Vortex to mix and spin down.

2m

- 8.2 Add **14 µl Library PCR Master Mix** (from step 8.1) into **11 µl Cleaned TSRT Product** (from step 7). Vortex to mix and spin down.

45m

## 9 Run library PCR reaction.

Initial Denaturation:

- **95 °C 00:03:00**

16-20 cycles:

- **98 °C 00:00:20**
- **63 °C 00:00:15**
- **72 °C 00:00:45**

Final Extension:

- **72 °C 00:02:00**
- **4 °C Hold**

## 10 Size selection of final library. SPRI bead size selection is used to remove fragments that are outside the ideal size for Illumina sequencing.

20m

## 10.1 Removal of small fragments.

1. Transfer library PCR product from step 9 into 0.5 mL tube.
2. Pipette **16.3 µl RNAClean XP Beads** up and down 10 times into **25 µl Library PCR Product** from step 9.
3. Incubate for **00:05:00** at **Room temperature**.
4. Place tubes on magnetic rack and incubate for **00:05:00** at **Room temperature**.
5. Carefully aspirate supernatant, leaving ~ **2 µl** in tube to avoid sucking up beads.
6. While tube is still on rack, wash beads with **175 µl 70% Ethanol** and immediately discard wash without incubation.
7. Air dry beads for **00:05:00** at **Room temperature**.
8. Resuspend beads in **17 µl Nuclease Free Water** and incubate on magnetic rack for **00:01:00** at **Room temperature**.
9. Transfer **15 µl Supernatant** to new 0.5 mL tube.
10. **Optional:** Reserve **1 µl Remaining Supernatant** from beads if you would like to see library size distribution after removing small fragments.

- ## 10.2 Removal of large fragments. 40m
1. Pipette **8.3 µl RNAClean XP Beads** up and down 10 times into **15 µl Cleaned Product** from step 10.1. Make sure to vortex the beads again prior to use.
  2. Incubate for **00:10:00** at **Room temperature**.
  3. Place tubes on magnetic rack and incubate for **00:10:00** at **Room temperature**.
  4. Transfer **22 µl Supernatant** to new tube.
  5. Pipette **22 µl RNAClean XP Beads** up and down 10 times into **22 µl Supernatant** from previous step.
  6. Incubate for **00:05:00** at **Room temperature**.
  7. Place tubes on magnetic rack and incubate for **00:05:00** at **Room temperature**.
  8. Carefully aspirate supernatant, leaving ~ **2 µl** in tube to avoid sucking up beads.
  9. While tube is still on rack, wash beads with **175 µl 70% Ethanol**, and immediately discard wash without incubation.
  10. Air dry beads for **00:05:00** at **Room temperature**.
  11. Resuspend beads in **16 µl Nuclease Free Water**, and incubate on magnetic rack for **00:01:00** at **Room temperature**.
  12. Transfer **15 µl Supernatant** to new tube.

### Library Quality Control

- ## 11 Run final libraries on the Agilent TapeStation using a High Sensitivity D5000 ScreenTape. 15m

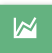

Final libraries should be distributed between 250 to 750 bp with a total library amount of 25 to 100 ng.
