# Supplementary material for: Simple and efficient profiling of transcription initiation and transcript levels with STRIPE-seq
Source: HighWire-hosted journal article supplement (doi:10.1101/gr.261545.120), 2020-06-01
Supplement: Supplemental_Table_S2.xlsx [file Supplemental_Table_S2.xlsx]

## Sheet: README
Policastro et al
Supplemental Table S2
Tab	Description
Differential TSRs	Information on all yeast TSRs differentially regulated by diamide treatment
Promoter-proximal diff. TSRs	Information on promoter-proximal yeast TSRs differentially regulated by diamide treatment

## Sheet: Differential TSRs
chr	start	end	strand	log2FC	logCPM	F	PValue	FDR
I	101151	101196	-	-1.65216	9.55459	132.606	1.35203e-07	2.27646e-06
I	114803	114818	+	-1.06631	5.57722	7.87806	0.0166505	0.0307949
I	124782	124818	+	1.03272	7.90692	37.8292	6.36949e-05	0.000273315
I	130686	130779	+	-2.20261	8.65417	207.174	1.25824e-08	4.29795e-07
I	136815	136905	+	2.20349	7.79525	51.2996	1.57625e-05	9.09849e-05
I	140012	140378	-	6.26079	7.39592	57.0537	9.51163e-06	6.23768e-05
I	140597	141029	-	3.16101	8.92087	110.531	3.49171e-07	4.69356e-06
I	141095	141133	-	2.6351	7.24408	50.721	1.66269e-05	9.47381e-05
I	141182	141675	-	1.39649	11.2395	54.7711	1.15596e-05	7.16545e-05
I	142117	142246	+	-1.70883	10.0702	104.344	4.69997e-07	5.99937e-06
I	142639	142936	+	-1.89666	7.6506	23.8025	0.000449213	0.00141572
I	158847	158897	+	-1.35981	6.74504	23.8523	0.000445499	0.00140675
I	165849	165919	-	1.16932	6.54796	13.9904	0.00311042	0.00730469
I	188621	188684	-	1.48457	7.18508	37.9919	6.24893e-05	0.000270047
I	190145	190217	+	2.78887	6.94123	130.917	1.44605e-07	2.36919e-06
I	192549	192619	+	1.47204	6.39159	8.0472	0.015771	0.0293579
I	24828	25010	+	3.21644	7.91254	211.81	1.11672e-08	3.91187e-07
I	31517	31542	+	7.88149	5.75919	94.7456	3.4662e-06	2.82049e-05
I	34345	34362	-	-3.96142	5.45851	54.0484	1.23134e-05	7.48027e-05
I	36511	36571	+	-2.35184	6.58935	58.9448	8.13282e-06	5.51174e-05
I	39190	39237	+	1.57145	6.28947	14.4861	0.00277032	0.00661775
I	44423	44601	-	7.27822	5.23325	48.0988	5.72359e-05	0.000253543
I	45037	45102	-	11.3098	8.92865	664.17	5.58675e-10	8.49536e-08
I	45742	45951	+	2.38517	7.68882	66.8958	4.39823e-06	3.34926e-05
I	52617	52669	-	1.31541	6.29558	11.6806	0.00552455	0.0119424
I	72395	72631	+	-1.34746	7.41383	10.2334	0.00818861	0.016756
I	76178	76199	-	-1.64746	5.35106	9.69367	0.00955629	0.019144
I	76364	76455	+	-1.06872	10.6375	49.1327	1.93021e-05	0.000106732
I	81974	82006	-	1.51738	7.3905	43.8123	3.28139e-05	0.000161956
I	82688	82711	+	-2.37482	5.87454	17.2465	0.00151462	0.00395182
I	84482	84509	-	1.12334	6.65449	19.0833	0.00104819	0.00287837
I	92849	92893	+	-1.4086	6.27934	15.381	0.00226121	0.00557115
II	101161	101224	-	1.85107	8.24106	66.7793	4.43597e-06	3.37273e-05
II	111383	111473	+	1.43949	8.23045	79.5285	1.86679e-06	1.71392e-05
II	113626	113651	+	1.88958	5.4132	20.5562	0.000793368	0.00228163
II	117460	117491	+	-2.36713	5.84422	34.2143	9.91159e-05	0.00039565
II	126591	126717	+	9.18153	6.92755	243.609	5.40709e-08	1.139e-06
II	127535	127594	-	-7.0892	4.76516	44.3366	7.89173e-05	0.000327097
II	132399	132432	+	-2.00939	5.96941	40.2534	4.82261e-05	0.000221177
II	136527	136580	+	3.60857	6.7787	56.7895	9.72544e-06	6.32674e-05
II	140316	140349	-	-1.81035	6.05985	28.9954	0.000200949	0.000721637
II	143270	143351	+	7.83652	5.72777	90.8138	4.15398e-06	3.21867e-05
II	145758	145818	-	-4.85345	6.45327	106.006	4.33276e-07	5.65234e-06
II	159691	159724	-	1.09648	8.30321	53.4427	1.299e-05	7.83261e-05
II	160074	160147	+	-1.22141	8.11684	52.3322	1.43478e-05	8.4626e-05
II	161661	161724	+	-1.13105	6.1315	13.753	0.00329071	0.00765421
II	166906	166967	-	1.78941	6.21148	29.3081	0.000192118	0.000694021
II	167850	167899	-	-1.11832	7.67343	28.2524	0.000223925	0.000789133
II	168364	168418	+	-2.55337	10.022	244.726	5.11106e-09	2.29131e-07
II	171399	171483	+	1.35473	6.10175	13.3659	0.00361184	0.00829019
II	172472	172530	+	-2.3807	6.73191	78.6619	1.97197e-06	1.77696e-05
II	194016	194083	+	2.56198	7.56003	138.423	1.07898e-07	1.94456e-06
II	201742	201792	-	-1.42545	5.33414	12.2338	0.00478749	0.0105455
II	217380	217430	+	-1.93741	5.61552	11.0967	0.00645291	0.0136403
II	220982	221031	-	-6.93779	4.62778	53.4035	3.76733e-05	0.000180254
II	221105	221165	-	-2.86092	6.36504	81.8307	1.6179e-06	1.51398e-05
II	227499	227586	+	-1.57547	7.15531	29.0607	0.000199066	0.000715401
II	235786	235856	-	-2.47533	8.55018	207.027	1.26306e-08	4.29795e-07
II	236356	236518	+	-2.1217	8.50339	156.318	5.6753e-08	1.17515e-06
II	237404	237579	-	1.26305	9.22696	66.6899	4.46516e-06	3.38434e-05
II	23756	23795	-	-1.13165	7.58489	36.1129	7.82352e-05	0.000324823
II	241396	241447	-	1.70836	6.30466	31.5318	0.000140957	0.000531787
II	245813	245883	+	1.22107	6.70503	14.4334	0.00280434	0.00669574
II	248015	248099	+	-3.36807	5.01607	25.1701	0.000359306	0.00117105
II	250947	251014	-	-1.69868	5.76812	13.4288	0.00355719	0.00817248
II	254881	254940	-	-2.76485	5.13703	20.8226	0.000755477	0.00219603
II	255706	255782	-	-1.27025	8.86358	62.7074	6.02951e-06	4.35305e-05
II	256303	256324	+	-1.03466	7.37256	25.688	0.000330924	0.00109499
II	28155	28285	-	4.32582	7.17936	264.022	3.38343e-09	1.76789e-07
II	283482	283530	-	2.3354	4.94044	12.953	0.00399604	0.00904406
II	293968	294087	-	2.20314	7.44855	52.3459	1.433e-05	8.46234e-05
II	300142	300160	+	-1.94481	7.88174	86.2866	1.23872e-06	1.25575e-05
II	305986	306005	-	-1.28431	5.6207	8.56281	0.0134116	0.025423
II	307556	307608	+	-1.51034	5.46761	12.5914	0.00437282	0.00977748
II	311461	311512	-	1.83864	7.72681	60.5447	7.14722e-06	4.96125e-05
II	311777	311888	+	-1.33091	7.57213	31.1534	0.000148406	0.00055507
II	315481	315552	+	1.43773	9.43448	82.9201	1.51386e-06	1.43876e-05
II	31825	31929	+	1.89234	6.68084	13.6558	0.003368	0.00780785
II	326258	326338	+	-1.34276	5.64509	14.6296	0.00268018	0.00643718
II	331504	331595	-	1.00884	8.19216	20.5138	0.00079959	0.00229546
II	332733	332900	+	-2.44373	10.9537	123.98	1.9226e-07	2.94194e-06
II	333388	333492	+	-2.86129	5.97682	15.0842	0.00241671	0.00588279
II	336902	336967	-	1.02018	6.50593	11.3463	0.00603508	0.0128858
II	338121	338332	-	3.82079	8.13984	288.319	2.09356e-09	1.4133e-07
II	340736	340782	-	1.12523	8.07087	48.2925	2.09212e-05	0.000113492
II	347767	347885	+	1.11359	7.10413	24.1347	0.000425142	0.00135035
II	365713	365754	-	-1.09991	6.47063	16.634	0.00172214	0.00440817
II	366578	366629	-	1.51158	7.26472	52.8313	1.37178e-05	8.14037e-05
II	36702	36830	+	1.36661	9.17937	91.2313	9.34053e-07	1.01453e-05
II	371908	371960	+	-2.30926	5.42578	22.5522	0.000555433	0.00169663
II	372351	372865	-	1.55715	11.0973	63.6879	5.59133e-06	4.0852e-05
II	380201	380381	+	1.94402	8.6125	64.0168	5.45284e-06	3.99e-05
II	380434	380469	+	2.17883	6.19891	35.7123	8.21725e-05	0.000339144
II	381883	382395	+	4.52945	10.6139	512.196	8.84069e-11	3.50135e-08
II	398294	398312	-	-1.31694	6.66108	28.2513	0.000223961	0.000789133
II	406980	407042	-	3.68763	5.18214	24.2417	0.000417715	0.00133111
II	40765	40789	+	-1.05624	5.66321	7.01333	0.0221781	0.0392027
II	410971	411040	+	-2.85632	6.43365	51.2072	1.58969e-05	9.15438e-05
II	415255	415343	-	-2.31078	9.99633	236.112	6.20743e-09	2.58165e-07
II	419142	419255	-	1.34837	8.90439	88.5394	1.08731e-06	1.13537e-05
II	426793	426921	-	1.85657	8.82678	160.551	4.92453e-08	1.05563e-06
II	429115	429132	-	-7.46297	5.06943	74.581	9.54707e-06	6.24409e-05
II	447539	447603	+	1.90384	6.54448	46.243	2.55905e-05	0.00013318
II	449575	449607	+	-4.1558	4.844	29.5685	0.00018511	0.000672198
II	451985	452114	-	-2.14817	8.1256	160.553	4.9242e-08	1.05563e-06
II	45512	45680	+	-1.90706	9.84312	227.707	7.55377e-09	2.96424e-07
II	467290	467411	+	1.28061	6.21355	9.44684	0.0102713	0.0203674
II	473945	474043	-	-2.15154	7.08018	98.3607	6.36398e-07	7.38859e-06
II	474277	474344	+	-6.06194	6.52094	137.366	1.12337e-07	1.995e-06
II	476458	476503	-	9.88373	7.57536	420.671	4.53393e-09	2.18437e-07
II	479268	479338	+	-1.94563	6.25719	38.7426	5.72635e-05	0.000253543
II	483361	483572	-	-1.61727	9.74442	87.0102	1.18753e-06	1.21909e-05
II	486702	486773	-	1.08758	6.18389	9.3053	0.01071	0.0211162
II	489525	489888	-	1.95551	7.34369	24.3135	0.000412816	0.00131982
II	501580	501629	-	2.75428	6.19456	42.6233	3.72104e-05	0.000178215
II	512937	513031	+	2.36248	6.89728	71.0036	3.28063e-06	2.71028e-05
II	528234	528285	+	-1.09973	6.73984	16.9765	0.00160224	0.00414707
II	533706	533721	+	-1.32714	5.56004	8.01481	0.015935	0.0296066
II	549674	549742	+	-1.63473	6.12808	26.8883	0.0002747	0.000941346
II	554310	554398	-	2.12481	7.71826	111.982	3.26383e-07	4.46119e-06
II	564985	565016	+	-1.88189	5.35328	8.0224	0.0158964	0.0295574
II	565604	565644	+	-1.70134	5.91424	17.1843	0.0015343	0.00399246
II	565728	565733	+	-2.35668	4.60532	13.7185	0.00331787	0.0077137
II	571220	571246	-	-1.13578	6.9288	26.642	0.000285256	0.000972228
II	576011	576112	-	1.68023	8.34272	80.8763	1.71603e-06	1.59051e-05
II	578056	578159	-	1.02213	7.54577	22.5157	0.000558956	0.00170632
II	592766	592839	-	-3.31401	9.57717	507.008	9.3542e-11	3.50135e-08
II	59548	59608	-	1.04793	6.33095	13.1559	0.00380148	0.00866417
II	602505	602554	+	-4.34639	5.29647	39.6943	5.13594e-05	0.00023273
II	604454	604537	+	-3.18726	9.69136	405.527	3.21738e-10	6.80685e-08
II	606191	606276	+	-2.66599	9.05065	256.754	3.93832e-09	1.9555e-07
II	60757	60845	-	-3.13959	7.01788	107.264	4.07695e-07	5.37627e-06
II	615848	615896	-	-1.00303	6.48466	12.2523	0.00476496	0.010501
II	620809	620841	+	1.99258	6.36399	27.9103	0.000235536	0.000823362
II	623203	623263	-	7.94715	5.82264	100.706	2.66824e-06	2.26196e-05
II	623422	623477	+	1.28764	7.77321	33.352	0.000110731	0.000432783
II	628934	628989	+	1.32928	6.13187	14.8819	0.00252999	0.0061279
II	633406	633457	-	2.60378	6.15333	58.4054	8.50058e-06	5.64738e-05
II	647434	647550	+	1.09854	7.50513	14.2816	0.00290502	0.00690349
II	670440	670514	+	1.76065	6.13461	20.3667	0.000821667	0.00235467
II	679758	679969	-	4.9971	6.21464	21.0854	0.000720188	0.00211238
II	680011	680116	-	1.21875	10.4372	21.9387	0.000618279	0.00185253
II	683099	683170	-	1.88401	7.56411	59.152	7.99652e-06	5.44973e-05
II	697286	697402	-	-4.31311	7.82702	250.257	4.527e-09	2.18437e-07
II	704070	704095	-	3.24761	6.11636	39.1061	5.49185e-05	0.000245168
II	714449	714537	-	-1.16133	8.90929	56.8719	9.65813e-06	6.29979e-05
II	71540	71595	+	-2.09989	7.16858	77.5728	2.11421e-06	1.8705e-05
II	716510	716561	-	-2.81928	6.17382	29.8919	0.000176823	0.00064496
II	718015	718130	-	-3.13909	7.5364	132.146	1.37693e-07	2.29457e-06
II	722559	722605	+	-1.92501	7.15095	96.2745	7.10119e-07	8.087e-06
II	727044	727124	-	1.57696	7.75354	88.9237	1.06372e-06	1.11553e-05
II	736023	736099	-	1.00513	8.90045	27.7898	0.000239797	0.000835007
II	742510	742607	-	1.23715	9.21628	36.865	7.14276e-05	0.000300632
II	764664	764742	-	1.80673	6.12433	19.5337	0.000961168	0.00269105
II	773771	773846	+	4.34147	5.72048	35.316	8.62984e-05	0.000353475
II	776499	776548	+	1.0577	6.91251	18.6823	0.00113357	0.00307809
II	779504	779521	-	-1.28726	6.41511	21.1238	0.000715195	0.00210153
II	786831	786870	-	-1.32685	5.18524	10.0082	0.00872903	0.0177129
II	789093	789181	+	9.62631	7.32133	101.882	2.53828e-06	2.1742e-05
II	798551	798605	-	3.98165	7.91268	242.791	5.33606e-09	2.33921e-07
II	799367	799469	+	7.73106	5.61073	58.5951	2.58709e-05	0.000134352
II	80687	80803	-	2.09383	9.20551	180.919	2.60472e-08	6.85112e-07
II	84269	84307	-	-2.28563	6.47687	56.7067	9.79356e-06	6.34709e-05
II	85732	85813	-	7.12352	5.11565	54.6838	3.42405e-05	0.000167116
II	85855	86071	-	8.64894	6.40422	41.6245	0.000100943	0.000401626
II	86456	86491	-	10.392	8.05082	504.479	1.97488e-09	1.39431e-07
II	89436	89501	-	-1.82634	9.14708	158.87	5.20771e-08	1.10658e-06
II	90685	90712	+	-3.73923	5.65864	42.8806	3.62028e-05	0.000174074
II	92339	92396	+	-1.44951	5.86403	14.7618	0.00260026	0.00627621
II	96094	96179	-	1.13112	8.47424	24.7599	0.000383839	0.00123775
III	103344	103402	-	-1.01218	7.91696	38.7203	5.74108e-05	0.000253965
III	104362	104394	-	1.2094	6.04827	14.5876	0.00270622	0.00648693
III	105520	105598	-	-1.31569	8.51544	53.5179	1.29036e-05	7.79988e-05
III	106807	106919	-	-1.2341	8.37724	39.9973	4.96324e-05	0.000226771
III	114594	114678	+	3.0591	5.473	28.2933	0.000222584	0.000786158
III	120478	120527	-	2.07824	7.91046	78.8875	1.94393e-06	1.76213e-05
III	122338	122401	-	2.36307	7.85768	171.52	3.46374e-08	8.24065e-07
III	123358	123449	-	-3.46101	6.01105	48.3854	2.07347e-05	0.000112774
III	132548	132669	-	7.83512	5.72108	93.6869	3.63682e-06	2.90392e-05
III	133173	133280	-	6.26535	9.61789	529.799	7.32953e-11	3.48983e-08
III	133415	133456	-	4.35556	6.06744	37.7897	6.39918e-05	0.000274347
III	143573	143626	+	-2.90439	6.61246	33.1177	0.000114159	0.000443335
III	155227	155310	+	1.23582	5.9201	11.7773	0.00538643	0.0116698
III	166389	166425	-	1.32861	6.8244	35.6395	8.29126e-05	0.00034162
III	16878	16944	-	1.06002	9.09566	51.6139	1.53151e-05	8.91428e-05
III	17226	17317	+	-1.13076	7.00006	29.6835	0.000182111	0.000662791
III	178220	178270	-	-2.31673	8.95535	267.856	3.12796e-09	1.76336e-07
III	190536	190566	+	-2.33445	5.33588	21.0152	0.000729422	0.00213303
III	206668	206703	-	-1.41824	6.32688	15.1029	0.00240657	0.00586105
III	216593	216667	+	-1.47296	6.686	26.8173	0.000277695	0.000948922
III	220137	220184	-	-1.78222	4.97037	13.283	0.00368533	0.008435
III	22141	22172	-	1.96155	5.83344	19.1776	0.00102921	0.0028422
III	23384	23447	-	-2.06238	7.72608	118.046	2.48236e-07	3.57372e-06
III	23519	23614	+	-1.10915	7.12791	27.6105	0.000246301	0.00085485
III	250018	250070	-	1.13862	6.45002	9.9863	0.00878372	0.0178016
III	258810	258913	+	1.05143	9.71472	47.4653	2.26738e-05	0.000121242
III	263299	263348	+	1.64876	5.59065	8.1422	0.0153013	0.0286122
III	264431	264509	-	-2.14919	6.61371	30.774	0.000156346	0.000581635
III	27326	27399	-	1.81867	6.47826	37.6072	6.5384e-05	0.000279332
III	38799	38874	-	-1.19585	8.2733	69.2561	3.7095e-06	2.94461e-05
III	40739	40809	-	1.24352	6.27872	13.268	0.00369886	0.00845456
III	48372	48447	-	2.18768	6.71653	39.2142	5.42431e-05	0.000243045
III	49570	49953	-	9.71633	7.40138	68.9957	1.32079e-05	7.94433e-05
III	50778	50868	+	1.89586	8.80782	156.556	5.62955e-08	1.17066e-06
III	51209	51514	+	4.64888	7.30919	44.3277	3.11002e-05	0.000155205
III	51612	51707	+	7.18566	5.16964	59.6616	2.40356e-05	0.000126557
III	58734	58772	-	-1.89545	7.23487	90.6677	9.63917e-07	1.03541e-05
III	61099	61264	-	1.65394	10.2141	137.88	1.1015e-07	1.97055e-06
III	63214	63293	-	2.71695	5.95552	21.0326	0.000727115	0.00212885
III	63364	63439	+	1.03133	7.44838	19.2362	0.00101764	0.00281836
III	67753	67824	-	-3.25465	4.97134	14.3282	0.00287364	0.00683771
III	68359	68415	-	-5.24416	7.79306	232.563	6.73826e-09	2.70978e-07
IV	1005564	1005651	+	1.38072	8.19937	37.2237	6.84282e-05	0.000290045
IV	1008926	1008991	+	1.2126	8.6562	82.8675	1.5187e-06	1.44054e-05
IV	101068	101119	-	1.7355	6.66315	25.1714	0.000359231	0.00117105
IV	1011573	1011641	+	-1.35921	7.26583	44.144	3.16987e-05	0.000157394
IV	1012155	1012181	+	3.01702	6.38915	86.5899	1.21695e-06	1.23885e-05
IV	1015832	1015863	-	-1.22356	7.83086	51.0015	1.6201e-05	9.28476e-05
IV	1020592	1020705	+	-1.13507	7.96976	45.3029	2.8137e-05	0.000142768
IV	1022352	1022479	-	2.89078	7.13972	80.3691	1.77102e-06	1.63525e-05
IV	1024711	1024762	-	1.50497	5.9713	12.5699	0.0043965	0.00981798
IV	103368	103422	-	1.09089	7.10299	15.7767	0.00207184	0.00515681
IV	1035907	1036003	+	2.082	6.97751	60.9854	6.90087e-06	4.82466e-05
IV	1056515	1056529	+	-5.40746	5.90324	83.9493	1.42273e-06	1.3628e-05
IV	1058890	1058994	-	2.16598	7.30058	81.7648	1.62446e-06	1.5172e-05
IV	1059545	1059615	+	-2.1226	9.60378	99.5085	5.99688e-07	7.15216e-06
IV	1062797	1062869	-	-2.72068	6.00019	49.7668	1.81774e-05	0.000101668
IV	1067660	1067706	+	-1.21648	6.16984	19.009	0.0010634	0.00291358
IV	1072754	1072767	+	-6.71965	4.46465	47.2507	6.14165e-05	0.000266833
IV	1084553	1084617	-	1.24799	6.98154	17.2979	0.00149861	0.00391424
IV	1095625	1095667	+	1.95443	5.94881	12.2937	0.00471488	0.0104143
IV	1108099	1108171	-	1.02896	7.09893	28.449	0.000217558	0.000772728
IV	1108483	1108537	-	3.09569	5.51298	17.1681	0.00153947	0.00400272
IV	1108652	1108680	+	-2.01129	5.88576	18.74	0.00112079	0.00305019
IV	1112288	1112339	-	1.77984	7.93878	108.388	3.8634e-07	5.13642e-06
IV	1127561	1127629	-	1.24409	7.76667	34.0452	0.000101275	0.00040229
IV	1127788	1127845	+	1.45202	7.42862	27.5486	0.000248596	0.000861586
IV	1135768	1135798	+	1.18392	5.6805	8.3254	0.0144416	0.0271219
IV	1150500	1150560	-	-1.03051	7.546	31.6082	0.000139508	0.000527054
IV	1153617	1153718	-	-1.27254	7.26121	40.6961	4.59038e-05	0.000211904
IV	1155962	1156108	-	1.15775	9.41281	43.4804	3.39764e-05	0.000166327
IV	1161405	1161422	-	7.70535	5.60753	76.7916	8.44667e-06	5.63806e-05
IV	1164677	1164697	-	-6.76739	7.22386	220.515	8.98513e-09	3.33753e-07
IV	1172008	1172040	-	-1.07076	5.89411	9.05272	0.0115494	0.022399
IV	117605	117699	+	-1.82837	9.50179	202.734	1.41391e-08	4.52637e-07
IV	1189535	1189738	-	1.65832	7.62187	59.5501	7.74214e-06	5.32108e-05
IV	1195118	1195217	-	1.49252	6.00164	13.5478	0.00345654	0.00799026
IV	1198772	1198821	-	1.353	5.6806	9.29666	0.0107375	0.0211361
IV	1201926	1201956	+	7.79435	5.68472	91.2713	4.06592e-06	3.17064e-05
IV	1204166	1204242	-	1.66128	6.72847	21.1964	0.000705868	0.00207915
IV	1206399	1206474	-	-2.82559	7.8684	276.465	2.63264e-09	1.58153e-07
IV	1206944	1206999	+	1.7485	7.68767	56.4921	9.97286e-06	6.42754e-05
IV	1212779	1212811	+	-1.30844	5.2919	7.18955	0.0208923	0.0373758
IV	1213848	1213904	+	2.19039	6.0205	20.1965	0.000848131	0.00241769
IV	121987	122046	+	-1.28383	6.18995	16.8566	0.00164306	0.00424145
IV	1222658	1222726	+	1.16958	5.98491	9.86871	0.00908491	0.0182968
IV	1228354	1228433	+	6.54347	8.03363	196.202	1.68622e-08	5.12822e-07
IV	1228478	1228813	+	1.24889	11.1797	46.4709	2.50146e-05	0.000130462
IV	1234096	1234218	+	4.10855	7.8972	240.576	5.60806e-09	2.39867e-07
IV	1238822	1238889	-	1.70192	6.08152	9.10467	0.0113705	0.0221227
IV	1239385	1239434	+	-2.00057	8.17027	135.958	1.18591e-07	2.08327e-06
IV	1242060	1242160	-	2.85817	8.62319	265.217	3.30125e-09	1.76789e-07
IV	1243117	1243214	+	-1.90007	8.79375	146.816	7.91022e-08	1.52328e-06
IV	1269986	1270076	+	-1.81926	7.48956	50.4516	1.70483e-05	9.67541e-05
IV	1277559	1277651	+	1.38034	8.29178	53.6992	1.26982e-05	7.68527e-05
IV	1288857	1288935	-	-2.92148	6.80942	34.9243	9.06182e-05	0.000368686
IV	1294426	1294467	-	1.65216	5.61637	14.0218	0.0030875	0.00725787
IV	1294607	1294708	+	-1.003	9.61552	61.324	6.71843e-06	4.74483e-05
IV	1301544	1301654	+	-2.51641	8.31442	174.68	3.14213e-08	7.75374e-07
IV	1305968	1306071	+	1.04899	7.33808	23.3401	0.000485439	0.00151711
IV	1319835	1319898	-	1.33242	6.41029	19.4368	0.000979137	0.00273349
IV	133391	133420	+	-1.04678	7.98265	37.9193	6.30239e-05	0.000271633
IV	1337263	1337307	+	-2.73451	5.01201	32.8783	0.000117793	0.000455989
IV	1339575	1339624	+	-1.65487	5.41356	17.7329	0.00137066	0.00362086
IV	134990	135227	+	2.28536	9.28727	139.458	1.03746e-07	1.88368e-06
IV	1350198	1350225	+	-1.66699	5.50608	12.736	0.00421735	0.0094657
IV	1355561	1355590	-	-4.16858	7.46312	228.531	7.40755e-09	2.9305e-07
IV	1358919	1358943	-	-2.97815	6.00755	60.9939	6.89624e-06	4.82466e-05
IV	1359878	1359939	+	-1.93257	9.59034	119.581	2.32104e-07	3.43288e-06
IV	1362710	1362765	+	1.4658	7.43736	56.0344	1.03684e-05	6.58649e-05
IV	1365682	1365744	-	3.81119	7.70378	64.7672	5.15169e-06	3.7982e-05
IV	1366840	1366887	-	-1.56818	6.66527	23.8927	0.000442522	0.00139916
IV	1385760	1385828	-	2.58127	6.72974	41.9551	3.99849e-05	0.000189636
IV	1394574	1394642	-	-1.92511	8.24847	67.6072	4.17589e-06	3.22538e-05
IV	1401689	1401803	+	-2.33222	9.38247	269.686	3.0141e-09	1.72549e-07
IV	1402919	1402919	+	-3.14165	4.9851	16.5036	0.00177055	0.00450837
IV	1410173	1410199	-	-1.4837	5.52349	16.0346	0.00195846	0.00492245
IV	1411137	1411192	-	1.52669	6.88023	6.80879	0.0237909	0.0415978
IV	1414507	1414588	+	-1.199	7.53555	33.3084	0.00011136	0.000433821
IV	1417056	1417097	+	3.40459	4.96137	18.271	0.0012298	0.0032989
IV	1420619	1420691	-	2.97196	7.08753	107.461	4.03871e-07	5.34031e-06
IV	1428987	1429059	-	-1.15295	6.90789	27.7694	0.000240527	0.000836601
IV	1430976	1431011	+	-2.15854	5.46133	22.3695	0.000573332	0.00174365
IV	1434770	1434800	+	-2.83022	6.14426	81.3936	1.662e-06	1.54633e-05
IV	1443407	1443471	-	-1.61334	8.82042	62.917	5.93252e-06	4.29578e-05
IV	1450766	1450926	-	-1.52394	8.59454	113.163	3.09111e-07	4.261e-06
IV	1451327	1451340	+	-2.473	5.87807	54.4066	1.19327e-05	7.31293e-05
IV	1459360	1459409	-	4.70642	6.02356	56.8545	9.67225e-06	6.30056e-05
IV	1461570	1461624	-	1.67849	6.19087	23.6658	0.000459576	0.00144557
IV	1468378	1468554	-	-1.70302	9.54553	77.889	2.0717e-06	1.84632e-05
IV	1469953	1470032	+	1.4909	6.58674	15.7273	0.00209442	0.00520665
IV	1470953	1471089	+	1.7111	7.79963	105.286	4.48755e-07	5.79216e-06
IV	147531	147693	-	1.7675	9.37948	126.12	1.75813e-07	2.76863e-06
IV	1476477	1476588	-	-1.11272	7.66286	29.9548	0.000175262	0.00064026
IV	1480356	1480427	+	1.36679	7.3877	47.1308	2.34312e-05	0.000124065
IV	1489034	1489085	-	-1.4102	7.41072	38.1528	6.13236e-05	0.000266833
IV	1489780	1489866	-	-1.21564	9.69064	78.5006	1.99231e-06	1.79197e-05
IV	1490481	1490575	+	1.15924	6.48643	10.4956	0.00760857	0.0157345
IV	1492657	1492922	-	3.29702	8.11292	65.4413	4.8977e-06	3.66649e-05
IV	1493008	1493026	-	1.8429	6.0052	23.2225	0.000495194	0.00154364
IV	1497762	1497837	-	1.79127	5.91922	24.7509	0.000384399	0.00123873
IV	1501743	1501849	-	8.31619	6.10667	47.6904	5.92042e-05	0.000260007
IV	1501987	1502222	-	4.68484	9.63267	438.708	2.08397e-10	5.33716e-08
IV	1518265	1518317	+	7.71925	5.61338	68.6711	1.3469e-05	8.04175e-05
IV	158721	158789	-	2.98859	8.57783	277.302	2.58959e-09	1.57512e-07
IV	159522	159588	+	1.08862	6.24615	10.8599	0.00688158	0.0144522
IV	163188	163213	-	-1.38638	6.40277	16.8071	0.00166026	0.0042813
IV	183001	183105	-	-1.20301	10.183	48.6054	2.03004e-05	0.000111366
IV	183203	183262	+	-1.45791	7.21379	53.1608	1.33197e-05	7.99184e-05
IV	184872	184959	+	1.71541	7.8152	85.9766	1.26144e-06	1.25657e-05
IV	18737	18780	-	8.59858	6.39573	152.821	4.3299e-07	5.65234e-06
IV	190600	190664	-	-2.30283	8.51257	240.127	5.66516e-09	2.39867e-07
IV	199739	199792	-	1.21841	7.35806	17.2717	0.00150675	0.00393338
IV	202800	202848	+	-1.34863	5.21545	8.44741	0.013901	0.0262077
IV	215967	216153	+	1.21496	9.24772	70.6111	3.37165e-06	2.76668e-05
IV	217534	217591	+	-2.64201	8.01082	154.506	6.03727e-08	1.2448e-06
IV	222271	222370	+	1.86602	6.87331	52.1371	1.46032e-05	8.58202e-05
IV	227341	227393	+	-1.32877	7.10881	46.5962	2.47043e-05	0.000129121
IV	229091	229355	+	1.73675	10.4189	62.4212	6.16494e-06	4.42875e-05
IV	229794	229897	+	-1.98537	9.25036	118.531	2.43e-07	3.5513e-06
IV	230855	230997	+	-1.85419	6.27668	22.393	0.000570986	0.0017376
IV	236596	237004	-	2.18071	8.49909	25.5914	0.000336012	0.001107
IV	237047	237139	-	3.59003	5.07379	19.1941	0.00102594	0.0028381
IV	238629	238744	-	1.01855	9.46886	56.6867	9.81014e-06	6.34709e-05
IV	239711	239816	-	2.36258	8.48934	34.7201	9.29706e-05	0.000375945
IV	240124	240283	+	1.50334	10.4081	126.376	1.73957e-07	2.75725e-06
IV	242312	242362	+	-2.12366	5.55893	19.2858	0.00100795	0.00279628
IV	258300	258396	-	2.98118	5.40401	25.6819	0.000331242	0.00109499
IV	258835	258870	+	-1.37504	6.23271	19.5424	0.000959569	0.00269105
IV	264935	265036	-	1.76039	8.36383	104.941	4.56407e-07	5.85983e-06
IV	286662	286759	-	1.61926	8.36603	58.6193	8.3524e-06	5.61364e-05
IV	303094	303189	+	5.10789	7.2221	163.556	4.46216e-08	9.91455e-07
IV	307783	307826	-	-3.47191	8.47634	406.74	3.16478e-10	6.80685e-08
IV	308333	308419	+	-2.84036	9.26521	370.872	5.26357e-10	8.29424e-08
IV	310130	310235	-	-1.72225	8.00636	84.8762	1.34614e-06	1.31798e-05
IV	314734	314861	-	-1.01061	9.34804	11.1471	0.00636587	0.0134856
IV	316398	316464	-	1.04023	7.17015	10.9033	0.00680042	0.0142941
IV	322103	322232	+	-2.41166	9.4545	297.348	1.76896e-09	1.36631e-07
IV	326172	326236	-	-1.18044	6.34048	20.9404	0.000739416	0.00215578
IV	330452	330518	-	1.47778	7.86666	64.772	5.14981e-06	3.7982e-05
IV	334370	334454	-	1.29579	9.08795	59.9238	7.512e-06	5.17021e-05
IV	341207	341279	-	-2.03479	8.33353	138.126	1.09123e-07	1.95939e-06
IV	363903	363943	+	-1.85849	7.80491	94.2138	7.93007e-07	8.87074e-06
IV	36522	36625	-	1.39425	7.22674	42.2092	3.89022e-05	0.000185405
IV	365889	365973	-	7.68889	5.59366	81.1902	6.68112e-06	4.72534e-05
IV	368162	368361	-	-1.93456	9.38965	192.321	1.87718e-08	5.50263e-07
IV	369303	369317	+	-6.67798	4.43126	47.8012	5.86623e-05	0.000258093
IV	381465	381500	-	-1.2753	7.25664	43.1052	3.53498e-05	0.000171498
IV	385765	385787	-	-7.7597	5.32357	93.6657	3.64034e-06	2.90392e-05
IV	403388	403467	-	1.01553	5.91827	7.03157	0.0220407	0.0390426
IV	413855	413988	+	1.82918	7.67894	64.3809	5.30422e-06	3.89884e-05
IV	416673	416855	-	2.54491	8.95935	282.385	2.34528e-09	1.50123e-07
IV	427215	427292	+	-2.83771	7.0427	103.892	4.80615e-07	6.09029e-06
IV	431969	432072	-	-2.77453	6.03436	51.7907	1.50702e-05	8.80329e-05
IV	44026	44044	+	-2.90214	7.34308	203.662	1.37959e-08	4.47539e-07
IV	444556	444579	+	-3.56448	4.91981	19.8674	0.000902172	0.00255082
IV	447607	447714	-	-1.01594	8.12998	44.4806	3.06122e-05	0.000153724
IV	451863	452036	-	3.76052	6.18567	21.9136	0.000621017	0.00185847
IV	452204	452207	-	6.70475	4.78789	42.9538	8.93243e-05	0.00036403
IV	452813	452837	+	1.4156	5.83001	13.1376	0.00381857	0.00869905
IV	454030	454143	+	1.02859	7.39385	22.0064	0.000610948	0.00183397
IV	465657	465687	+	-1.31397	6.7336	27.8473	0.000237753	0.000830394
IV	471809	471843	+	-2.19592	6.04574	46.5073	2.4924e-05	0.000130129
IV	477770	477796	+	7.08601	5.09136	55.2612	3.28172e-05	0.000161956
IV	483838	483891	-	7.08371	5.07941	51.9764	4.20065e-05	0.000196353
IV	486668	486727	+	-2.0658	5.72452	23.4823	0.000473944	0.00148548
IV	488666	488739	-	1.55038	8.25163	103.699	4.85248e-07	6.10357e-06
IV	489452	489500	+	-1.63204	8.80764	140.314	1.00456e-07	1.83633e-06
IV	491413	491546	+	-2.11079	9.76444	170.334	3.59438e-08	8.4494e-07
IV	494134	494277	-	2.22971	7.78998	43.5431	3.37534e-05	0.000165736
IV	497385	497449	-	1.94173	5.82196	16.2563	0.00186683	0.00471651
IV	501331	501387	-	1.6973	7.39745	46.8636	2.40577e-05	0.000126557
IV	501487	501549	-	4.18699	5.59147	34.6727	9.35271e-05	0.000377366
IV	503440	503500	+	1.71832	6.31454	31.3119	0.000145232	0.000545326
IV	504730	504768	-	2.20935	8.20325	177.717	2.86568e-08	7.22507e-07
IV	507875	507951	+	-1.3313	7.59786	37.0657	6.97309e-05	0.000294796
IV	512239	512261	-	-1.10523	5.48528	7.33638	0.0198886	0.0359368
IV	521255	521321	+	3.4334	7.3805	108.397	3.86181e-07	5.13642e-06
IV	521727	521843	+	-1.16521	7.80502	53.9888	1.23781e-05	7.51022e-05
IV	525324	525431	+	-3.32034	8.48225	344.722	7.86826e-10	9.11594e-08
IV	526884	526889	+	-2.617	5.21329	13.5854	0.00342543	0.00792212
IV	530943	531062	+	1.30236	6.87016	14.3302	0.0028723	0.00683771
IV	538053	538128	-	2.4149	6.07111	34.7147	9.30336e-05	0.000375945
IV	538575	538619	-	-1.85849	5.56615	8.75649	0.0126356	0.0242352
IV	544757	544871	+	5.95334	7.12622	135.572	1.20377e-07	2.09947e-06
IV	548431	548469	-	-2.04842	5.52725	23.1948	0.000497531	0.00154993
IV	550651	550679	-	-1.91182	7.27721	78.8524	1.94827e-06	1.76213e-05
IV	551510	551516	+	-7.11256	4.77141	59.67	2.40217e-05	0.000126557
IV	551703	551750	+	1.41461	5.9528	16.4123	0.00180539	0.00458749
IV	562336	562537	-	1.31717	7.44664	23.953	0.000438114	0.00138642
IV	563448	563487	+	1.8954	9.39953	194.496	1.76719e-08	5.3081e-07
IV	569779	569857	-	2.92803	7.41118	184.42	2.35068e-08	6.3451e-07
IV	570047	570103	+	6.98254	5.00979	51.6261	4.31611e-05	0.000200786
IV	570555	570627	+	-2.50308	8.48473	120.259	2.25371e-07	3.35369e-06
IV	579360	579523	+	-2.45437	9.06836	211.785	1.11745e-08	3.91187e-07
IV	587693	587792	-	1.47034	7.41936	47.1479	2.33919e-05	0.000124065
IV	588285	588557	-	3.93649	9.40378	265.157	3.30534e-09	1.76789e-07
IV	591470	591540	-	-1.19509	5.96651	7.49225	0.0188853	0.0343664
IV	592445	592478	+	1.38941	7.12485	27.0256	0.000269015	0.000924454
IV	593609	593729	+	-2.30835	5.59109	16.0162	0.0019663	0.00493961
IV	59456	59651	-	7.88111	5.73519	57.4845	2.79665e-05	0.000142296
IV	600706	601621	+	1.74931	12.5651	77.438	2.13264e-06	1.87997e-05
IV	60442	60468	-	8.11223	5.96974	108.817	1.91064e-06	1.74759e-05
IV	612043	612060	+	-1.79998	8.41031	112.236	3.22577e-07	4.42158e-06
IV	616157	616329	-	2.34015	8.76042	216.966	9.80801e-09	3.56708e-07
IV	618319	618366	-	-3.55906	6.93238	86.4169	1.22931e-06	1.24881e-05
IV	61869	61932	-	4.28617	7.37712	102.68	5.10514e-07	6.33715e-06
IV	621576	621608	+	3.0083	6.49417	26.9362	0.0002727	0.000935795
IV	628547	628606	-	-1.42452	5.97067	19.4448	0.000977645	0.0027309
IV	631000	631027	+	-1.92608	5.63902	28.0824	0.000229608	0.000806114
IV	636486	636626	+	1.26087	6.88578	20.5787	0.000790072	0.00227485
IV	637046	637078	+	-2.065	5.12363	11.0161	0.00659521	0.0139108
IV	65188	65241	+	-2.20053	5.9004	14.5911	0.00270401	0.00648693
IV	657482	657494	-	-1.92261	6.66665	40.1037	4.90424e-05	0.000224497
IV	658227	658365	+	-1.21122	7.44727	22.9185	0.000521505	0.00161223
IV	66436	66477	+	8.58888	6.38479	166.548	2.95941e-07	4.12621e-06
IV	664931	664984	-	1.33668	6.05525	13.9328	0.0031531	0.00738352
IV	690945	690987	+	1.4369	7.27772	47.1991	2.32742e-05	0.000123773
IV	693230	693241	-	-1.42685	6.16911	15.3786	0.00226243	0.00557135
IV	693442	693488	+	-1.75443	7.25467	57.7093	9.00454e-06	5.92911e-05
IV	693696	693732	+	7.93063	5.80439	95.4969	3.351e-06	2.75439e-05
IV	702634	702767	-	1.75883	7.75833	72.7989	2.89949e-06	2.44099e-05
IV	704101	704131	-	-6.93036	4.62596	47.0543	6.24367e-05	0.000270047
IV	704394	704461	+	-1.77477	6.22432	41.1426	4.36937e-05	0.000202489
IV	73326	73363	-	-3.90076	4.94255	29.2213	0.000194524	0.00070219
IV	733901	733996	-	1.12838	6.22209	7.82375	0.0169452	0.0312805
IV	73935	74159	-	2.5503	8.96726	179.782	2.69403e-08	6.97907e-07
IV	755089	755319	-	1.60758	7.71288	25.5815	0.000336537	0.00110798
IV	755247	755303	+	-1.47547	5.29896	6.78885	0.0239556	0.0418381
IV	765213	765271	-	-1.27572	6.28065	15.5808	0.00216315	0.00535942
IV	765319	765347	-	-2.17942	5.15777	21.6547	0.000650182	0.00193504
IV	76577	76675	-	8.39219	6.21121	144.651	5.51654e-07	6.67749e-06
IV	768019	768043	-	-1.74213	5.19776	7.05182	0.0218893	0.0388377
IV	770310	770386	+	-2.65562	9.83688	263.57	3.41515e-09	1.76789e-07
IV	770606	770828	+	-1.61148	7.50649	13.5854	0.0034254	0.00792212
IV	775948	776060	+	1.13943	6.0982	12.3299	0.00467168	0.0103376
IV	778970	779025	+	-2.76518	6.24937	43.0293	3.56354e-05	0.000172196
IV	784801	784861	+	-2.89162	6.77828	129.678	1.51996e-07	2.47105e-06
IV	802183	802261	-	1.49669	6.18572	12.8795	0.00406943	0.00920161
IV	803142	803142	+	-1.59942	7.24458	64.9207	5.0925e-06	3.77305e-05
IV	806739	806799	+	3.37617	4.9521	18.6103	0.00114975	0.00311463
IV	812195	812274	+	-2.63702	6.12063	70.8022	3.32696e-06	2.7439e-05
IV	827356	827414	-	1.28461	6.41868	21.3956	0.000681002	0.00201322
IV	831500	831619	-	-2.61305	8.53676	184.553	2.34166e-08	6.3451e-07
IV	850949	851076	-	1.23853	7.28365	38.7821	5.70029e-05	0.00025308
IV	87443	87503	+	-1.87713	8.06421	89.3675	1.03721e-06	1.09008e-05
IV	884653	884711	+	-1.61334	5.55854	17.9591	0.00130924	0.00348202
IV	889489	889591	+	-1.50206	7.66321	47.1395	2.34112e-05	0.000124065
IV	904058	904105	-	8.22992	6.08306	82.8012	6.14893e-06	4.42614e-05
IV	911804	911819	+	3.17449	7.26003	139.297	1.0438e-07	1.88815e-06
IV	917420	917491	+	1.36531	7.10895	22.6886	0.000542508	0.00166192
IV	930314	930451	-	-1.7467	9.30437	133.74	1.29294e-07	2.2153e-06
IV	933473	933524	+	-1.00749	6.02854	7.6898	0.0176991	0.0324384
IV	94107	94117	+	-1.178	5.23428	7.28113	0.0202594	0.0364444
IV	94540	94605	+	2.07605	8.98435	167.574	3.92135e-08	9.08633e-07
IV	952697	952742	+	-1.12454	7.12489	26.5965	0.000287258	0.00097748
IV	969664	969730	-	9.27361	7.01072	280.051	2.88242e-08	7.22983e-07
IV	975941	976003	-	1.66197	5.70186	15.973	0.00198488	0.00497723
IV	982612	982664	+	-1.07308	5.46611	6.69554	0.0247443	0.0430542
IV	99458	99544	+	-1.06844	6.9851	27.1788	0.000262838	0.000905785
IV	998324	998447	-	1.46817	7.5214	46.7585	2.43094e-05	0.00012733
IX	102256	102329	-	-2.3757	5.63834	17.7824	0.00135693	0.00359045
IX	102631	102686	+	1.04263	6.29208	12.6922	0.00426377	0.00955667
IX	117652	117722	-	-1.97587	8.90151	149.25	7.25156e-08	1.43439e-06
IX	122386	122590	+	2.12339	8.87306	178.224	2.82239e-08	7.15299e-07
IX	126146	126237	+	2.33878	6.45681	44.2942	3.12083e-05	0.000155435
IX	127427	127472	+	-1.24623	7.39168	45.0633	2.88331e-05	0.000145687
IX	128085	128110	+	-3.24214	5.5235	42.2806	3.86042e-05	0.000184203
IX	132186	132240	+	-1.86242	6.53366	32.0735	0.000131045	0.000498449
IX	141606	141720	-	5.70488	6.91206	113.34	3.06627e-07	4.25084e-06
IX	142858	142901	+	-1.56612	6.85267	39.6711	5.1495e-05	0.000233093
IX	150005	150056	-	-1.18405	5.61036	7.78236	0.017174	0.0316548
IX	154862	154933	-	-7.16094	4.80278	52.761	3.95533e-05	0.000188139
IX	155176	155202	+	-3.37244	5.48407	16.0831	0.00193799	0.00487856
IX	160858	160871	+	1.46037	5.96873	6.66207	0.0250347	0.0434912
IX	165913	165943	-	1.04847	7.09572	19.0308	0.00105891	0.00290453
IX	166399	166399	+	-2.26672	4.90282	12.955	0.00399413	0.00904396
IX	171692	171732	+	-1.77864	5.68276	16.4319	0.00179787	0.00457243
IX	177268	177435	-	2.27308	8.68958	164.072	4.388e-08	9.88519e-07
IX	187647	187735	-	-1.58701	6.49301	34.5324	9.51973e-05	0.000383151
IX	193178	193249	-	-1.73152	8.79036	123.064	1.99841e-07	3.04836e-06
IX	197431	197501	-	7.6569	5.58045	70.644	1.1973e-05	7.32837e-05
IX	199426	199484	-	1.26196	6.70197	21.1103	0.000716942	0.0021054
IX	200092	200201	-	1.26156	7.2648	17.7553	0.00136443	0.00360833
IX	202065	202108	-	-1.88262	4.9801	15.3184	0.00229299	0.00563455
IX	212432	212482	+	-2.06044	7.5508	67.7601	4.12987e-06	3.21022e-05
IX	218397	218609	-	3.61612	6.8635	21.5609	0.000661145	0.00196406
IX	232376	232459	-	-2.89127	8.79089	131.061	1.43772e-07	2.36919e-06
IX	241756	241866	-	1.33328	8.24409	41.7818	4.07439e-05	0.000192081
IX	248369	248502	-	6.66251	9.48318	902.351	3.76784e-12	9.16715e-09
IX	249650	249724	+	-1.32648	5.82104	14.1982	0.00296218	0.00702427
IX	252984	253040	-	6.75815	4.81906	41.8609	9.87486e-05	0.000394591
IX	255049	255109	+	-2.17381	8.76371	112.707	3.15653e-07	4.33889e-06
IX	257080	257164	-	-1.95277	8.81199	149.554	7.17407e-08	1.42486e-06
IX	257929	258100	-	7.8387	5.7222	76.8621	8.41423e-06	5.62614e-05
IX	261467	261586	+	8.07249	5.94624	72.1547	1.09623e-05	6.86519e-05
IX	268420	268470	+	7.75502	5.64901	52.2289	4.11973e-05	0.000193687
IX	289459	289632	-	9.48982	7.20591	313.137	1.73822e-08	5.25352e-07
IX	309190	309228	-	8.04252	5.89807	108.976	1.89864e-06	1.73988e-05
IX	312814	312875	+	-1.01055	6.94434	26.0408	0.000313098	0.00104999
IX	31326	31351	-	-1.92089	5.34414	21.7064	0.000644236	0.00192076
IX	314840	314919	-	-1.67282	6.84506	53.0062	1.35048e-05	8.05323e-05
IX	315061	315095	+	-2.51403	6.49563	61.9529	6.39435e-06	4.56231e-05
IX	316703	316774	+	-3.15334	7.49823	105.435	4.45491e-07	5.78069e-06
IX	322285	322324	+	-3.57821	4.93958	23.0199	0.000512557	0.00158658
IX	325566	325614	-	2.31102	5.25471	13.9116	0.00316891	0.00741341
IX	32964	32973	-	-1.18257	5.41444	8.36241	0.0142751	0.0268609
IX	344034	344064	+	2.25165	5.18697	13.8056	0.00324968	0.00756601
IX	345631	345716	+	1.78141	6.76813	43.3052	3.46097e-05	0.00016858
IX	37346	37350	+	-1.46438	5.7163	16.4039	0.00180866	0.00458859
IX	374447	374519	+	-1.82699	6.49458	37.3376	6.75072e-05	0.000287896
IX	381049	381088	+	1.0223	6.78036	12.7557	0.00419662	0.00942787
IX	381924	381950	+	-2.99378	5.92714	53.1033	1.33882e-05	8.01319e-05
IX	382578	382607	+	1.68338	5.98389	14.8932	0.00252352	0.00611831
IX	386323	386354	-	-4.40476	5.04081	33.9386	0.000102666	0.000407149
IX	386400	386485	-	-6.76118	4.49752	48.9953	5.31866e-05	0.000239192
IX	405974	406031	-	-2.25455	6.98498	70.0945	3.496e-06	2.83526e-05
IX	412778	412810	-	-2.96728	4.6969	14.3573	0.0028543	0.00680168
IX	41445	41478	-	9.40021	7.12957	258.366	4.14807e-08	9.47629e-07
IX	421810	421859	-	-3.01191	6.15653	78.0221	2.05412e-06	1.83844e-05
IX	422859	422931	-	2.09825	7.36441	77.2228	2.16246e-06	1.90281e-05
IX	423049	423128	+	3.09666	6.35125	31.3114	0.000145241	0.000545326
IX	424513	424571	-	1.21765	8.01342	64.8749	5.11008e-06	3.77898e-05
IX	46131	46140	+	3.28742	4.86529	18.5789	0.00115688	0.00312918
IX	46185	46216	+	-2.39503	6.80749	74.7267	2.54684e-06	2.1742e-05
IX	47513	47586	-	1.10114	7.61133	37.2485	6.82262e-05	0.000289947
IX	53724	53809	-	3.12011	7.39382	125.896	1.77456e-07	2.78549e-06
IX	68643	68708	+	-1.6979	9.88664	143.645	8.87694e-08	1.66777e-06
IX	77284	77358	-	-2.43723	7.1073	90.5641	9.69527e-07	1.03915e-05
IX	93510	94180	+	2.20997	11.1581	173.808	3.22727e-08	7.85195e-07
IX	99392	99490	-	-2.84473	9.42818	441.381	2.01516e-10	5.33716e-08
Mito	13987	13991	+	3.20578	5.56274	13.8523	0.00321385	0.00748975
Mito	16632	16745	+	7.55282	5.44638	40.9812	0.000107223	0.000422383
Mito	6546	6715	+	4.03126	6.43772	18.1759	0.00125339	0.00335294
Mito	7157	7275	+	3.82431	6.71186	34.741	9.27272e-05	0.000375383
Mito	7332	7388	+	7.9777	5.83088	77.22	8.25163e-06	5.56899e-05
V	101753	101890	+	-1.57696	7.57746	45.5436	2.74575e-05	0.000141107
V	118034	118052	-	1.40646	6.51001	21.0949	0.000718955	0.00211003
V	122937	122977	-	-2.04636	7.58069	86.7547	1.20531e-06	1.22957e-05
V	126401	126421	-	-2.1749	5.23523	25.3256	0.000350492	0.00114689
V	131627	131765	+	1.3058	8.64894	39.2841	5.38121e-05	0.000241336
V	132040	132208	+	7.79942	5.67352	61.5281	2.11892e-05	0.000114563
V	141629	141652	+	1.11082	6.81864	12.2573	0.00475886	0.0104924
V	141711	141807	+	3.05911	5.26639	15.6381	0.00213593	0.00530007
V	153462	153482	+	-1.51243	5.82444	20.7301	0.000768382	0.00223088
V	156739	156796	+	-1.19284	9.30182	63.5852	5.63544e-06	4.10509e-05
V	159293	159410	+	1.93824	6.32881	43.9918	3.22049e-05	0.000159257
V	159548	159582	+	1.59447	7.53452	81.9549	1.60562e-06	1.5083e-05
V	162658	162706	+	-1.90957	8.99379	98.3204	6.37733e-07	7.38859e-06
V	16288	16342	+	-3.61744	5.81887	34.3045	9.79852e-05	0.000392102
V	167586	167586	-	-1.12923	5.31008	8.47132	0.0137978	0.0260638
V	172027	172106	+	-1.25999	7.58773	46.768	2.42866e-05	0.00012733
V	173306	173367	-	1.39186	5.36351	7.25735	0.0204215	0.0366413
V	175182	175205	+	-2.9407	5.67033	27.8277	0.000238448	0.000831748
V	182546	182584	+	1.00095	6.57114	14.7328	0.00261752	0.0063085
V	184465	184547	+	7.87342	5.76177	87.5308	4.85882e-06	3.64861e-05
V	192842	192875	+	-1.87224	5.85275	28.384	0.000219641	0.000778989
V	196874	196965	+	1.32668	8.11695	68.9025	3.80412e-06	3.00501e-05
V	202160	202194	+	4.48403	6.67047	89.6034	1.02344e-06	1.08262e-05
V	211902	211988	-	-8.37781	5.89473	116.863	1.40253e-06	1.35143e-05
V	225810	225889	+	1.26804	5.79962	9.08511	0.0114375	0.0222303
V	237139	237203	-	-1.8877	7.3777	51.5234	1.54424e-05	8.96691e-05
V	251697	251719	+	-2.3094	5.85615	37.2957	6.78445e-05	0.000288829
V	254625	254648	+	1.25096	5.40383	8.58451	0.0133219	0.0253022
V	258007	258098	-	-5.17126	5.68963	67.1005	4.33286e-06	3.30984e-05
V	263977	264168	-	1.56309	9.15133	84.5284	1.3743e-06	1.3348e-05
V	264903	264967	+	8.06982	5.92582	112.827	1.63361e-06	1.52283e-05
V	265761	265918	-	-6.57534	7.94094	226.397	7.79316e-09	3.00964e-07
V	268178	268204	-	-2.5443	6.73158	102.157	5.2409e-07	6.45626e-06
V	270148	270239	-	-2.22692	9.31466	251.234	4.43217e-09	2.17848e-07
V	271701	271774	+	1.7017	6.93327	28.5552	0.000214208	0.000764176
V	27568	27669	+	1.13263	8.08345	55.3382	1.1006e-05	6.88368e-05
V	286922	286978	-	2.41066	8.53032	208.42	1.21823e-08	4.20418e-07
V	287163	287194	-	-2.50918	4.83273	15.3122	0.00229615	0.00563726
V	298872	298917	+	-4.41044	6.97915	106.228	4.28621e-07	5.62176e-06
V	303144	303230	-	-7.60072	5.16869	45.289	7.25994e-05	0.000304542
V	303944	303981	+	-2.37395	7.25865	124.123	1.911e-07	2.93907e-06
V	306267	306358	+	-2.24449	8.18112	119.222	2.35764e-07	3.47645e-06
V	327244	327264	+	4.36187	6.09209	32.3797	0.000125806	0.000482407
V	328368	328463	+	-1.55557	6.44168	33.0491	0.000115187	0.000446836
V	337623	337692	-	-1.01147	6.94758	25.2016	0.000357502	0.00116674
V	337856	337902	+	-1.41563	5.67189	11.6071	0.00563218	0.0121427
V	349382	349456	-	1.03226	7.63462	21.8137	0.000632084	0.0018881
V	355247	355331	+	1.39877	6.50635	22.0895	0.000602087	0.00181025
V	362696	362723	+	-2.54006	9.55927	332.088	9.65818e-10	1.03567e-07
V	364515	364621	+	1.23882	8.61287	38.2182	6.08565e-05	0.000265497
V	382215	382244	-	-1.86932	5.77057	27.8213	0.000238673	0.000831937
V	396205	396287	-	1.31947	7.0701	33.722	0.00010556	0.000417947
V	396718	396788	+	-2.78851	8.67892	163.069	4.5336e-08	9.96221e-07
V	402043	402202	-	4.5346	6.21262	54.0644	1.22961e-05	7.4791e-05
V	402299	402376	-	4.14133	5.53776	33.8813	0.000103423	0.000409818
V	402304	402510	+	2.78878	8.5904	175.729	3.04326e-08	7.58814e-07
V	404359	404393	-	-1.02541	6.20757	9.11833	0.011324	0.0220411
V	414188	414285	-	-1.41383	8.62469	84.3015	1.39305e-06	1.34732e-05
V	414442	414477	+	-2.33095	5.25711	27.8435	0.000237889	0.000830394
V	41654	42024	-	1.86235	10.3815	189.381	2.03896e-08	5.87077e-07
V	422486	422557	-	-1.73412	6.47893	35.6112	8.32022e-05	0.000342523
V	423472	423580	+	-2.37187	10.4775	132.153	1.37655e-07	2.29457e-06
V	42590	42701	-	1.47111	7.25399	38.3962	5.96083e-05	0.000261545
V	43052	43069	-	3.5633	5.62306	20.681	0.000775339	0.00224304
V	437779	437858	-	-1.20628	6.79507	28.3426	0.000220977	0.000782017
V	439471	439610	+	1.38182	7.93079	35.9278	8.0026e-05	0.000331128
V	441829	441896	-	-1.61382	6.56867	19.2788	0.00100931	0.00279687
V	441986	442328	+	1.81398	9.45223	47.6836	2.2195e-05	0.000118944
V	449539	449539	+	-3.45196	5.4408	30.4391	0.000163773	0.000605564
V	451336	451371	-	1.0674	5.77478	8.35589	0.0143042	0.0268951
V	456019	456129	-	2.89289	7.43498	134.701	1.24523e-07	2.15302e-06
V	456249	456315	+	1.16757	8.43366	59.2869	7.90924e-06	5.42062e-05
V	45798	45833	-	7.89772	5.78967	72.8738	1.05178e-05	6.64993e-05
V	460873	461115	-	1.14043	7.7306	12.5204	0.00445164	0.00991381
V	484343	484372	-	-2.61402	5.2389	18.1808	0.00125216	0.0033515
V	502888	502941	-	1.48438	7.37871	60.0551	7.43306e-06	5.1355e-05
V	505177	505222	+	2.69232	5.16648	11.7953	0.00536119	0.0116358
V	51537	51634	-	-1.92441	7.74764	102.708	5.09787e-07	6.33715e-06
V	517823	517862	+	2.03482	5.94101	18.765	0.00111529	0.00303885
V	522693	522721	-	-3.48309	4.68128	16.7846	0.00166818	0.00428808
V	53203	53304	-	-2.79068	8.34498	281.722	2.37555e-09	1.50123e-07
V	544081	544130	+	4.07364	5.49047	32.1327	0.000130012	0.000496186
V	551140	551170	-	1.60645	5.49805	10.8605	0.0068804	0.0144522
V	68884	68910	-	-1.41421	6.63867	26.6407	0.000285315	0.000972228
V	69737	69793	+	-1.19801	6.37517	16.5459	0.00175468	0.00447969
V	70419	70474	+	1.28366	5.74754	11.2166	0.00624814	0.0132766
V	73560	73607	+	-1.42176	5.95413	13.4903	0.00350473	0.00807482
V	75659	75733	+	7.61091	5.51795	70.8806	1.18074e-05	7.25442e-05
V	75801	75893	+	1.39132	5.39776	6.91054	0.0229717	0.0403882
V	78021	78049	+	-7.63454	5.2067	70.2925	1.22241e-05	7.44462e-05
V	80041	80176	-	-2.45178	7.74177	148.055	7.56646e-08	1.47274e-06
V	86853	86911	+	-1.26441	5.07297	8.58114	0.0133358	0.0253188
V	96028	96120	+	-1.6407	5.44201	14.7885	0.00258444	0.00625045
VI	103135	103230	-	1.39068	8.99692	46.7075	2.44328e-05	0.000127839
VI	106237	106326	-	2.42999	6.46135	52.9846	1.3531e-05	8.05897e-05
VI	107123	107526	+	5.04952	10.8851	554.193	5.70873e-11	3.38119e-08
VI	11251	11464	+	3.57882	7.13559	85.0095	1.33554e-06	1.31553e-05
VI	146915	146993	-	-2.705	5.66544	15.1483	0.00238208	0.00581889
VI	153331	153404	+	1.34453	7.91461	61.125	6.82496e-06	4.80611e-05
VI	15492	15504	-	7.98411	5.82853	70.932	1.17718e-05	7.24168e-05
VI	156085	156310	+	1.59297	8.59787	117.616	2.52996e-07	3.62082e-06
VI	160458	160541	+	1.09826	6.29094	7.30476	0.0200998	0.0362242
VI	173871	173973	-	1.35464	8.0737	41.4471	4.22583e-05	0.000197151
VI	196753	196830	+	-3.83511	5.55482	25.4389	0.000344233	0.00112949
VI	210104	210145	-	-1.57797	6.63173	41.861	4.0395e-05	0.000191022
VI	220767	220920	-	-7.1502	4.79986	55.9863	3.11302e-05	0.000155205
VI	221412	221528	-	-3.23278	7.74963	203.746	1.37654e-08	4.47539e-07
VI	223793	223806	-	-2.88106	6.76821	118.698	2.41222e-07	3.54619e-06
VI	239835	239858	-	1.19286	5.43889	9.25107	0.0108839	0.0213811
VI	245180	245206	-	1.33281	6.58028	20.9868	0.000733192	0.00214148
VI	248337	248517	+	1.79519	8.40373	133.474	1.30652e-07	2.23072e-06
VI	255614	255677	-	-6.88697	4.59407	52.0211	4.18616e-05	0.000195864
VI	264132	264198	+	-9.14666	6.63573	235.495	6.29742e-08	1.28014e-06
VI	45542	45641	-	1.67762	7.92227	98.4274	6.34191e-07	7.38272e-06
VI	55443	55851	-	1.97032	7.80189	25.8184	0.0003242	0.00107757
VI	64021	64064	-	-1.03583	6.96021	14.3433	0.00286356	0.00682041
VI	64939	64991	-	-2.85132	7.43671	190.211	1.99166e-08	5.80325e-07
VI	69525	69583	-	-7.40165	5.02115	64.3504	1.76222e-05	9.90179e-05
VI	82524	82565	+	-3.42302	7.40094	183.327	2.42674e-08	6.48821e-07
VI	96416	96484	+	1.3529	5.96042	7.98775	0.0160737	0.0298415
VII	1000860	1000890	+	1.04151	8.39961	39.0023	5.55761e-05	0.000247877
VII	1004528	1004626	+	6.88305	7.99189	261.455	3.56817e-09	1.82765e-07
VII	1010760	1010840	-	2.24379	7.32957	54.4951	1.18409e-05	7.26579e-05
VII	1016758	1016806	-	-1.21788	5.50091	10.192	0.00828482	0.0169244
VII	1021860	1021904	-	-3.38746	5.89083	69.5668	3.62865e-06	2.90392e-05
VII	1026614	1026698	-	1.30979	6.88928	10.7133	0.00716367	0.01498
VII	102853	103008	-	1.86563	5.81652	12.3387	0.00466125	0.0103192
VII	1038502	1038567	-	-1.75801	7.63314	94.3658	7.86516e-07	8.81841e-06
VII	1043095	1043116	-	1.18675	5.50793	9.78324	0.00931154	0.0187044
VII	1051717	1051786	-	-3.78499	9.17618	486.176	1.1803e-10	3.82888e-08
VII	1060048	1060086	-	-1.3377	6.70044	28.6128	0.000212414	0.000758331
VII	1061543	1061670	-	1.71658	7.02505	36.5521	7.41721e-05	0.000310871
VII	1063120	1063185	-	-1.95608	7.88114	102.619	5.12071e-07	6.3403e-06
VII	107932	108150	+	10.834	8.47271	587.857	9.79054e-10	1.03567e-07
VII	115926	116037	+	-1.88829	7.05004	70.363	3.43069e-06	2.80402e-05
VII	124647	124719	+	7.09422	5.10542	52.7405	3.96153e-05	0.00018825
VII	129802	129822	+	-1.67761	5.94285	22.6954	0.000541876	0.00166192
VII	131482	131512	+	-1.26258	6.48339	21.2349	0.00070098	0.00206725
VII	144678	144800	+	1.94138	9.017	174.473	3.16212e-08	7.75374e-07
VII	148910	149042	-	-2.27329	10.0097	233.292	6.62501e-09	2.68644e-07
VII	150545	150587	-	1.06656	6.58738	7.18285	0.0209395	0.0374189
VII	156043	156140	-	1.45304	5.80322	11.9874	0.00510041	0.0111494
VII	159869	159899	+	1.74444	6.07364	27.1154	0.000265373	0.000912582
VII	164999	165177	-	-1.00912	6.69479	16.1287	0.00191897	0.00483819
VII	167458	167542	-	-7.0971	4.76729	52.1443	4.14662e-05	0.000194388
VII	167792	167857	+	-1.06331	7.11542	24.545	0.000397482	0.00127835
VII	182318	182387	+	-2.19124	7.58923	114.968	2.84756e-07	3.98937e-06
VII	196514	196561	-	2.19117	5.53312	25.8648	0.000321843	0.00107193
VII	198092	198140	+	-7.04243	4.71485	60.8883	2.21162e-05	0.000118783
VII	208898	208965	+	-3.96402	6.26268	99.3056	6.05991e-07	7.20101e-06
VII	210305	210421	+	9.48054	7.20155	317.372	1.63545e-08	5.03676e-07
VII	226119	226182	-	-7.22681	4.87399	56.7688	2.94266e-05	0.000147923
VII	226293	226399	+	-1.23911	8.40322	68.5333	3.90597e-06	3.07997e-05
VII	228254	228379	-	-5.28429	9.12102	907.65	3.64642e-12	9.16715e-09
VII	228437	228490	-	-4.90826	5.48829	46.1928	2.57192e-05	0.000133707
VII	229624	229727	-	7.85844	5.76051	60.0528	2.34022e-05	0.000124065
VII	238286	238345	+	1.39097	6.27135	16.3098	0.00184551	0.00466991
VII	23879	23919	+	-2.73588	7.41302	101.181	5.50557e-07	6.67749e-06
VII	254518	254605	+	-2.70243	7.86851	216.606	9.89635e-09	3.56708e-07
VII	27491	27544	-	1.21484	7.16098	24.9097	0.000374658	0.00121377
VII	277486	277612	+	-2.56751	8.48572	203.2	1.39654e-08	4.50037e-07
VII	281107	281292	-	4.70392	8.84772	287.651	2.12025e-09	1.4133e-07
VII	283955	284011	-	-2.38475	7.76909	161.821	4.72257e-08	1.02961e-06
VII	299922	299957	+	-1.66371	6.33904	26.3106	0.000300225	0.0010131
VII	307367	307452	+	-1.07442	9.15989	45.4367	2.77568e-05	0.000141726
VII	310173	310225	-	2.47785	5.523	16.1548	0.00190814	0.00481339
VII	310902	311007	+	-1.98823	9.04808	205.162	1.32615e-08	4.41991e-07
VII	312115	312183	+	-1.48382	6.94085	34.2053	9.92288e-05	0.000395776
VII	31855	31916	+	1.28098	6.87903	15.839	0.00204376	0.00509734
VII	321716	321764	+	-1.46893	5.45958	15.7856	0.00206779	0.00514937
VII	325284	325296	+	4.01266	5.44124	30.5685	0.000160854	0.000596583
VII	343063	343103	-	3.74785	5.23115	24.9192	0.000374086	0.00121273
VII	343238	343319	+	1.16209	8.09052	10.6747	0.00724033	0.0151208
VII	35661	35810	+	1.10606	8.24398	19.3671	0.000992316	0.00276078
VII	358531	358671	+	1.68664	9.12137	121.124	2.17107e-07	3.28087e-06
VII	361888	361985	-	-1.13887	7.86261	22.1491	0.000595827	0.00179969
VII	365981	366139	-	-2.60771	8.43744	294.895	1.85089e-09	1.38561e-07
VII	368419	368480	+	2.57059	5.28301	17.1529	0.00154435	0.00401217
VII	368648	368735	+	1.55502	6.3417	14.088	0.0030397	0.00716975
VII	375987	376085	+	-1.65477	8.70807	56.9645	9.58315e-06	6.25928e-05
VII	377611	377626	+	1.53925	5.35686	10.9427	0.00672795	0.0141663
VII	385095	385173	+	1.06125	8.16007	30.7468	0.000156935	0.000583075
VII	389705	389809	-	-1.04664	7.61495	33.6285	0.00010684	0.000421298
VII	38977	39013	+	-1.16402	6.56518	12.875	0.00407395	0.00920327
VII	402887	402992	+	4.73712	6.06165	53.1266	1.33604e-05	8.00639e-05
VII	411284	411339	-	1.02296	8.20787	43.7256	3.31132e-05	0.000163251
VII	411451	411518	+	2.1048	6.60701	61.5636	6.59269e-06	4.66958e-05
VII	413724	413835	+	4.36148	5.72843	41.9707	3.99173e-05	0.0001895
VII	415896	415944	-	3.84689	5.63024	26.1593	0.000307364	0.00103249
VII	423826	423902	+	-2.99563	5.76646	57.0966	9.47745e-06	6.22365e-05
VII	436872	437018	-	-1.77223	7.17818	31.4366	0.00014279	0.000537367
VII	438415	438449	-	-2.41671	9.15015	245.311	5.04528e-09	2.29131e-07
VII	438945	439100	+	-2.32819	8.80654	132.82	1.34062e-07	2.27269e-06
VII	439932	440068	+	-1.36583	9.45294	64.3017	5.33611e-06	3.91637e-05
VII	448543	448579	-	-1.01861	6.42719	9.89976	0.0090042	0.0181501
VII	461597	461628	+	-2.93959	5.16774	22.3195	0.000578338	0.00175739
VII	472810	472849	+	-1.76085	6.67476	28.8408	0.000205493	0.000735782
VII	475476	475499	+	2.025	5.52332	23.4804	0.000474096	0.00148548
VII	478688	478735	-	-2.02425	7.01119	71.8184	3.10076e-06	2.58361e-05
VII	479779	480097	-	-3.56122	6.80307	17.1091	0.0015585	0.00404463
VII	482896	482910	-	-2.44853	7.9203	153.205	6.31389e-08	1.28014e-06
VII	485473	485669	+	1.78278	6.9911	28.1471	0.000227428	0.000799036
VII	496516	496615	-	-1.85923	6.53701	26.7827	0.000279168	0.000953286
VII	498043	498073	-	-1.04658	7.58865	30.9703	0.000152177	0.000567429
VII	508345	508473	-	1.20329	10.6334	82.0167	1.59956e-06	1.5055e-05
VII	508543	508550	-	-1.80939	5.20991	19.8565	0.000904021	0.00255457
VII	511580	511753	+	8.25446	6.11097	59.9348	2.35911e-05	0.000124641
VII	525163	525195	+	2.00264	6.82442	56.0836	1.0325e-05	6.57609e-05
VII	534804	534838	-	-1.98589	7.97452	91.5735	9.16449e-07	1.00342e-05
VII	535998	536088	+	1.23141	7.59764	36.3596	7.59216e-05	0.000316839
VII	542162	542205	+	2.37799	5.43952	11.9357	0.0051691	0.0112793
VII	547816	547860	+	2.11959	8.11242	156.864	5.57125e-08	1.16351e-06
VII	547956	548033	+	7.72279	5.62787	71.2932	1.15254e-05	7.15337e-05
VII	548082	548118	+	5.22865	6.46985	89.3954	1.03557e-06	1.09008e-05
VII	548447	548522	+	-2.18504	5.88027	24.3747	0.000408693	0.00130922
VII	555044	555097	-	2.41256	5.91323	40.2669	4.81534e-05	0.000221051
VII	555734	555805	+	-2.49671	8.67904	188.679	2.07995e-08	5.91873e-07
VII	557466	557523	-	-3.23839	7.57532	116.795	2.62377e-07	3.73312e-06
VII	56380	56464	+	-1.88918	5.93613	25.3807	0.000347431	0.00113922
VII	572423	572604	-	1.92487	6.94865	15.5206	0.00219213	0.00542017
VII	581431	581485	-	5.63193	8.36867	248.798	4.67315e-09	2.20857e-07
VII	589470	589520	-	1.28798	7.25197	30.3741	0.000165262	0.000609216
VII	589730	589799	+	1.31347	8.21285	58.9975	8.09785e-06	5.49584e-05
VII	591149	591298	+	-1.49409	7.99294	44.3804	3.09308e-05	0.000155164
VII	596513	596534	+	-1.02022	6.98893	15.7622	0.00207842	0.00517056
VII	615972	616087	-	-1.94065	6.86025	78.8766	1.94527e-06	1.76213e-05
VII	61999	62066	+	-1.10943	7.74527	35.0696	8.89861e-05	0.000362956
VII	622051	622112	+	-1.29958	5.3388	8.33418	0.0144019	0.0270683
VII	624780	624895	-	1.46419	7.29985	34.8493	9.14745e-05	0.000371238
VII	627095	627170	-	-1.80733	6.72144	50.726	1.66192e-05	9.47381e-05
VII	640402	640428	-	-1.60131	7.61252	65.0675	5.03667e-06	3.75897e-05
VII	640808	640849	+	-1.99521	5.26824	21.0058	0.000730664	0.00213538
VII	643784	643844	-	-1.49773	6.71944	30.2416	0.000168348	0.000619186
VII	648649	649036	-	-2.2663	11.0453	140.234	1.00761e-07	1.83633e-06
VII	649891	650094	-	3.30052	6.77599	19.2894	0.00100726	0.00279597
VII	650628	650744	-	1.07104	9.25977	56.6889	9.80833e-06	6.34709e-05
VII	654591	654615	+	1.17262	6.33377	12.8516	0.00409772	0.00923479
VII	662056	662090	+	-1.29904	6.3894	20.8491	0.00075183	0.00218673
VII	666247	666272	+	-1.46066	4.8738	8.30856	0.0145182	0.0272553
VII	668068	668145	+	-1.72335	5.43306	13.513	0.00348557	0.0080421
VII	672131	672268	+	-1.29277	8.42809	40.3831	4.75316e-05	0.000218403
VII	676384	676416	-	-1.39315	6.56488	32.8381	0.000118417	0.000458041
VII	678575	678683	+	2.02283	6.53334	44.0743	3.19291e-05	0.000158215
VII	695341	695394	+	-2.68465	6.45226	56.7325	9.77225e-06	6.34709e-05
VII	699825	699846	-	-1.25764	6.76781	19.85	0.00090514	0.00255624
VII	700067	700098	+	-1.42718	5.18731	11.7465	0.00543	0.0117537
VII	703349	703428	+	-1.37784	6.07669	17.1668	0.00153989	0.00400272
VII	713619	713708	+	2.63153	7.74084	148.182	7.5324e-08	1.47199e-06
VII	715735	715821	+	1.74402	6.98639	49.1349	1.92982e-05	0.000106732
VII	718819	718850	+	-1.62724	5.5177	11.3177	0.00608125	0.012973
VII	726928	727022	+	-1.65611	9.08946	91.3587	9.27454e-07	1.00962e-05
VII	729708	729760	-	-1.18328	5.69819	10.3356	0.00795653	0.0163649
VII	731337	731363	+	-1.37128	5.43713	11.2143	0.00625197	0.013279
VII	738212	738304	-	-2.19835	7.75735	76.7025	2.23662e-06	1.95745e-05
VII	739903	739939	+	-1.36312	6.78739	24.3345	0.000411399	0.00131702
VII	742058	742094	-	2.26692	4.8944	11.8198	0.00532711	0.011567
VII	750112	750172	-	-2.11675	7.06143	69.6418	3.60944e-06	2.89827e-05
VII	756465	756551	-	2.00135	7.80424	96.467	7.02909e-07	8.04745e-06
VII	765868	765895	-	-4.19134	6.18985	65.8648	4.7457e-06	3.5747e-05
VII	770510	770569	+	2.08142	6.89478	79.6542	1.85209e-06	1.70364e-05
VII	772395	772412	+	-2.13774	6.16878	44.2442	3.13703e-05	0.000156082
VII	781694	781747	+	-3.31185	5.93074	35.7344	8.19487e-05	0.000338508
VII	784195	784206	+	-6.63121	4.39626	44.0381	8.10334e-05	0.000335012
VII	784996	785205	-	1.82503	9.70214	153.506	6.24866e-08	1.27756e-06
VII	788142	788238	-	-2.34875	9.56263	175.587	3.05647e-08	7.58814e-07
VII	795509	795605	-	-2.3517	5.68532	26.6048	0.000286891	0.000976916
VII	796071	796087	+	1.30828	6.35874	20.128	0.000859044	0.00244308
VII	796203	796232	+	2.623	5.13681	9.84251	0.00915367	0.0184057
VII	796366	796443	+	7.61767	5.52781	66.2598	1.56187e-05	9.05845e-05
VII	798458	798533	+	-1.30157	8.19884	70.217	3.46604e-06	2.82049e-05
VII	802178	802211	+	-1.73878	6.5832	39.693	5.13671e-05	0.00023273
VII	807673	807718	-	-8.58175	6.08562	113.401	1.59806e-06	1.5055e-05
VII	809446	809453	-	-1.14255	5.2787	7.02467	0.0220925	0.0391059
VII	809490	809542	-	-1.7713	8.50497	110.681	3.46724e-07	4.69356e-06
VII	810176	810279	+	2.4569	7.20131	73.4739	2.76983e-06	2.344e-05
VII	812301	812344	+	1.50191	5.58517	9.04996	0.0115589	0.0224087
VII	812459	812504	+	2.13488	6.48828	23.0468	0.00051021	0.00158032
VII	823976	824064	+	-1.61965	7.51804	42.95	3.59369e-05	0.000173309
VII	835907	835938	-	-1.42142	5.96698	16.3822	0.00181706	0.00460751
VII	843778	843834	+	-1.25437	6.61104	20.3258	0.000827947	0.00236848
VII	846291	846383	-	1.11896	9.38257	49.7895	1.81385e-05	0.000101567
VII	853406	853458	-	1.1317	6.41403	17.4978	0.00143812	0.00377043
VII	856507	856533	-	-2.15674	6.9018	84.2892	1.39407e-06	1.34732e-05
VII	859484	859564	-	1.23199	8.03544	18.393	0.00120027	0.00323217
VII	865923	865942	+	-1.2189	5.16067	8.6715	0.0129693	0.0247486
VII	867529	867572	-	-1.83941	6.51848	53.8049	1.25802e-05	7.62334e-05
VII	873045	873099	-	4.12555	5.54072	33.2362	0.00011241	0.000437241
VII	875114	875165	-	1.14993	5.79614	6.57868	0.0257763	0.044636
VII	878222	878282	-	1.51545	6.36346	19.1018	0.00104443	0.00287454
VII	880175	880283	+	-1.119	7.87478	24.4532	0.00040348	0.00129337
VII	888738	888808	+	-1.13908	7.48164	40.6884	4.5943e-05	0.000211904
VII	894652	894677	+	-1.28783	6.41976	22.6937	0.000542031	0.00166192
VII	903123	903321	-	2.94055	6.68741	50.3831	1.71573e-05	9.69659e-05
VII	905857	905907	+	-2.02657	7.0449	96.1901	7.13307e-07	8.0908e-06
VII	909073	909129	+	1.66407	7.12439	58.3961	8.50704e-06	5.64738e-05
VII	911626	911686	-	-1.20799	7.37359	19.4472	0.000977196	0.0027309
VII	911780	911872	+	-1.63224	8.26884	46.335	2.53562e-05	0.000132102
VII	913254	913318	-	2.04749	9.61841	143.158	9.03718e-08	1.69134e-06
VII	914732	914900	-	-1.66362	8.49923	42.8987	3.61332e-05	0.000173911
VII	915117	915218	+	-1.21329	7.10602	17.5995	0.00140846	0.00370842
VII	920493	920570	+	-2.59123	8.74557	188.793	2.07326e-08	5.91873e-07
VII	920614	920618	+	-6.6789	4.43147	46.8696	6.34153e-05	0.000272356
VII	924465	924511	-	-1.83658	5.48837	8.198	0.0150331	0.0281351
VII	939914	939925	+	2.05037	5.51919	11.1585	0.00634642	0.0134561
VII	942220	942280	-	1.58018	6.34895	26.0147	0.000314374	0.00105137
VII	951741	951791	+	1.39668	6.18394	16.5504	0.00175299	0.00447779
VII	95771	95832	+	-9.64273	7.12958	364.511	8.71479e-09	3.26201e-07
VII	958382	958471	-	2.03299	5.79244	22.1663	0.000594032	0.00179538
VII	962062	962132	-	1.54926	7.26542	38.2292	6.07789e-05	0.000265497
VII	962791	963035	-	7.2907	9.81779	462.354	1.55883e-10	4.74079e-08
VII	97263	97361	+	1.15462	8.17748	38.6838	5.76533e-05	0.000254574
VII	973931	974001	-	-1.13873	7.84083	44.3564	3.10078e-05	0.000155205
VII	977190	977414	+	1.6461	9.17495	77.0791	2.18264e-06	1.9171e-05
VII	979330	979457	-	1.8441	10.0177	152.982	6.3629e-08	1.28472e-06
VII	985924	985965	+	2.10719	6.89451	26.8338	0.000276996	0.000947197
VII	987932	988040	+	-4.60302	6.69139	60.7775	7.01585e-06	4.88848e-05
VII	993650	993775	-	1.08161	9.33041	22.1829	0.00059231	0.0017924
VII	998578	998825	-	4.02527	6.75011	34.1503	9.99273e-05	0.000398236
VIII	10213	10247	-	2.06375	7.16907	51.1408	1.59943e-05	9.19954e-05
VIII	104213	104318	+	-2.52102	8.04244	179.658	2.70401e-08	6.97907e-07
VIII	107719	107828	+	1.25816	9.21983	85.1725	1.3227e-06	1.30552e-05
VIII	111303	111349	-	-1.96231	7.20649	68.0178	4.05361e-06	3.16611e-05
VIII	123056	123198	-	8.33737	6.14902	65.5733	1.63054e-05	9.32342e-05
VIII	123596	123695	-	2.19256	8.72676	240.098	5.66886e-09	2.39867e-07
VIII	126436	126551	+	-3.23225	8.77454	134.649	1.24774e-07	2.15302e-06
VIII	131473	131505	-	-1.2664	6.57708	22.7502	0.000536788	0.00165213
VIII	138490	138516	-	1.27387	5.91144	12.5448	0.00442441	0.00986673
VIII	141424	141467	-	-1.7131	6.76317	51.7302	1.51534e-05	8.84132e-05
VIII	143577	143626	-	-1.73836	8.5435	95.5351	7.38631e-07	8.35855e-06
VIII	143851	143974	+	-3.16294	6.83737	38.6062	5.81735e-05	0.000256639
VIII	146469	146481	+	3.64592	5.12608	23.2768	0.000490665	0.00153148
VIII	148677	148766	-	-2.05853	9.4488	193.83	1.80008e-08	5.37374e-07
VIII	159187	159234	-	-1.3888	6.68048	25.2047	0.000357324	0.00116674
VIII	159393	159431	+	-2.58822	6.13946	50.4441	1.70602e-05	9.67541e-05
VIII	162847	163099	-	5.16815	6.36732	21.2934	0.000693622	0.00204928
VIII	164705	164796	-	1.19981	8.7884	41.1527	4.3645e-05	0.000202456
VIII	180209	180237	+	-1.23273	5.88452	9.37025	0.010506	0.0207645
VIII	181916	181970	+	1.3377	7.51948	25.7148	0.000329527	0.00109155
VIII	193567	193647	-	3.21359	5.58896	32.474	0.000124242	0.000477159
VIII	201308	201388	-	-1.49379	6.45109	25.6111	0.000334965	0.00110579
VIII	206387	206433	+	-3.7276	5.92343	101.709	5.36058e-07	6.58702e-06
VIII	209498	209639	+	1.59593	8.46968	98.5941	6.28723e-07	7.37196e-06
VIII	210768	210826	+	-1.74525	6.26771	32.4828	0.000124098	0.000476983
VIII	216065	216238	-	1.80686	6.98088	30.8904	0.000153858	0.000572817
VIII	218771	218905	-	1.27343	8.44617	71.9474	3.07335e-06	2.56958e-05
VIII	225192	225226	-	-1.66745	5.84546	14.2808	0.00290554	0.00690349
VIII	227139	227220	-	-1.36654	8.6236	63.2901	5.76444e-06	4.18029e-05
VIII	229047	229101	-	-1.57366	6.30982	22.6804	0.000543278	0.00166264
VIII	229281	229317	+	-4.33346	4.97468	33.6731	0.000106228	0.000419364
VIII	232038	232090	+	-1.35418	7.44833	35.4177	8.52162e-05	0.000350221
VIII	234863	234892	+	-1.02599	5.7703	6.41527	0.0273072	0.047
VIII	236616	236694	+	-2.05528	8.28362	179.895	2.68502e-08	6.97907e-07
VIII	239013	239048	+	-1.35294	5.83211	11.5691	0.00568891	0.0122434
VIII	266839	267058	-	1.02656	7.47	21.5557	0.00066176	0.00196469
VIII	267465	267537	+	-1.65878	8.77289	99.5678	5.97861e-07	7.15216e-06
VIII	276722	276744	+	-1.15064	5.42441	8.50554	0.0136518	0.0258281
VIII	281418	281519	+	-1.50785	9.46719	86.1278	1.25029e-06	1.25657e-05
VIII	283296	283379	-	-3.06293	7.9267	163.925	4.40899e-08	9.88669e-07
VIII	288871	288893	-	-8.56386	6.06504	161.122	3.42712e-07	4.6582e-06
VIII	291144	291189	+	7.34089	5.30445	63.4017	1.87334e-05	0.00010406
VIII	292637	292680	-	-7.25673	4.88221	55.0591	3.33072e-05	0.000164041
VIII	294277	294330	+	-7.22411	4.8558	55.8009	3.15514e-05	0.000156823
VIII	296552	296619	-	4.73201	7.98941	448.181	1.85181e-10	5.30054e-08
VIII	316388	316448	+	1.14351	7.59812	19.7365	0.000924797	0.0026042
VIII	325575	325657	+	1.97081	5.67373	25.3491	0.000349182	0.00114419
VIII	32754	32812	-	1.84234	7.33075	71.2542	3.22403e-06	2.67716e-05
VIII	345268	345311	-	2.75354	5.40025	18.7902	0.0011098	0.00302875
VIII	357672	357712	+	3.4354	4.97602	20.6694	0.000777006	0.00224386
VIII	36017	36064	-	-2.02135	8.22352	135.809	1.19274e-07	2.08773e-06
VIII	360853	360915	+	-1.30706	7.35539	33.5493	0.000107938	0.000424596
VIII	369789	369889	-	1.24926	8.24398	75.4597	2.42618e-06	2.09694e-05
VIII	374979	375033	-	1.71813	6.99016	45.0077	2.89973e-05	0.000146067
VIII	375656	375750	+	2.73808	8.70573	318.985	1.20436e-09	1.10574e-07
VIII	377697	377798	-	1.15663	8.32587	58.7873	8.23824e-06	5.56768e-05
VIII	379210	379241	-	7.61805	5.5356	76.7425	8.46939e-06	5.64549e-05
VIII	382737	382802	-	-2.42156	8.83554	125.699	1.78914e-07	2.79934e-06
VIII	38438	38587	-	2.7659	7.72509	94.8209	7.67458e-07	8.64456e-06
VIII	388693	388782	-	-2.2433	7.09173	54.6047	1.17282e-05	7.22715e-05
VIII	39282	39334	-	3.86401	5.32875	27.9266	0.000234969	0.000822559
VIII	393493	393514	+	-1.74272	5.53642	8.63232	0.0131267	0.0249705
VIII	402914	402945	+	-1.28506	6.39292	20.6891	0.000774192	0.00224106
VIII	417461	417515	+	1.1098	6.3603	14.728	0.00262043	0.00631238
VIII	422883	422917	+	-2.0716	7.74081	131.443	1.41597e-07	2.34357e-06
VIII	423705	423726	+	-2.88445	6.13841	74.874	2.52203e-06	2.16441e-05
VIII	443739	443819	+	-1.79336	7.99175	133.1	1.32591e-07	2.2559e-06
VIII	451289	451311	+	-1.25485	8.72339	49.6284	1.84162e-05	0.000102767
VIII	452872	452999	+	1.26756	7.05104	13.2942	0.00367529	0.00841599
VIII	467170	467228	+	-1.20527	6.52772	18.0868	0.00127601	0.00340783
VIII	470875	470887	+	-1.97627	5.08947	17.5698	0.00141707	0.00372727
VIII	491857	491895	+	-1.49625	5.59293	16.2273	0.00187855	0.0047412
VIII	493855	493892	+	-4.99753	5.54558	52.9369	1.35888e-05	8.08349e-05
VIII	498385	498482	-	2.6386	6.09912	34.2418	9.87693e-05	0.000394591
VIII	501138	501187	-	-1.3338	6.66778	24.2123	0.000419742	0.00133582
VIII	505538	505655	-	-2.40957	8.569	169.37	3.70482e-08	8.66714e-07
VIII	509266	509325	+	3.79242	5.27543	25.4933	0.000341271	0.00112204
VIII	517467	517522	+	-1.73897	7.65941	85.9586	1.26277e-06	1.25657e-05
VIII	519396	519439	+	3.6576	6.30783	54.6399	1.16923e-05	7.22017e-05
VIII	54505	54570	+	2.20126	5.28884	13.4927	0.00350273	0.00807403
VIII	55234	55261	-	-4.22965	4.89762	33.6786	0.000106152	0.000419364
VIII	70250	70266	+	-1.46701	5.1797	10.6311	0.00732793	0.0152579
VIII	75358	75439	+	-3.41513	9.899	417.88	2.72636e-10	6.63324e-08
VIII	83719	83794	-	1.54548	7.3372	61.6669	6.53937e-06	4.64534e-05
X	105291	105404	+	5.16959	6.40989	65.4471	4.8956e-06	3.66649e-05
X	111194	111390	-	1.06406	8.85265	67.05	4.34889e-06	3.31688e-05
X	113328	113413	-	1.90631	7.0039	60.1123	7.399e-06	5.12141e-05
X	116884	117094	-	2.87459	7.12157	87.739	1.13846e-06	1.18119e-05
X	117181	117265	+	2.61501	6.25771	21.4358	0.000676104	0.00200239
X	120292	121121	+	1.30948	11.6427	58.3769	8.52056e-06	5.64864e-05
X	122930	123010	-	-1.49597	9.66311	124.2	1.90484e-07	2.93907e-06
X	126374	126430	-	-1.40531	5.40331	11.6942	0.00550482	0.0119051
X	129004	129035	-	3.51075	5.3726	21.7115	0.000643654	0.00192031
X	130679	130830	-	2.16437	6.60995	42.0925	3.93952e-05	0.000187571
X	137334	137358	+	2.2317	5.96714	26.5246	0.000290457	0.000984922
X	139949	139952	-	1.03007	5.58794	7.29496	0.0201658	0.0363163
X	140362	140395	+	-3.0657	7.92506	171.567	3.45866e-08	8.24065e-07
X	144902	144923	-	-3.22115	5.35748	27.787	0.000239897	0.000835007
X	154722	154771	-	-1.6801	8.00598	89.8533	1.00908e-06	1.07209e-05
X	156127	156235	-	2.30484	7.21365	67.5063	4.20662e-06	3.23371e-05
X	157261	157349	-	-2.83188	8.47099	130.942	1.44463e-07	2.36919e-06
X	159841	159895	-	-1.87841	7.50606	90.1639	9.91566e-07	1.06043e-05
X	172944	172947	-	-3.02458	6.75132	126.429	1.73578e-07	2.75725e-06
X	186689	186731	-	-1.94943	5.56614	7.04192	0.0219632	0.0389336
X	18744	18779	-	7.11181	5.11156	56.0586	3.0968e-05	0.000155191
X	189675	189718	+	-1.38761	7.22706	26.6613	0.000284413	0.000970516
X	191098	191115	-	-1.84749	6.49316	38.8334	5.66669e-05	0.000251819
X	191638	191687	+	-2.0395	5.37753	16.5245	0.0017627	0.00449543
X	192434	192516	+	1.96018	5.84029	23.1102	0.000504729	0.00156733
X	195037	195096	-	2.87562	7.40978	146.781	7.92006e-08	1.52328e-06
X	217319	217351	-	-2.42462	6.69906	90.0485	9.98033e-07	1.06464e-05
X	220037	220111	-	-1.01055	7.47313	9.51618	0.0100642	0.0200132
X	23090	23132	+	2.2478	6.77011	36.227	7.71548e-05	0.000321434
X	231259	231330	+	2.45574	6.883	88.7995	1.07127e-06	1.12103e-05
X	236484	236512	-	1.44642	7.25682	25.6026	0.000335419	0.00110654
X	241817	241980	+	1.11917	5.8414	9.29366	0.010747	0.0211464
X	265912	265932	+	6.81655	4.86566	43.7997	8.27728e-05	0.000341333
X	281067	281138	+	-3.38219	5.61388	38.0656	6.19519e-05	0.000268201
X	289386	289497	-	-2.35068	8.89124	185.81	2.25804e-08	6.17283e-07
X	305862	305931	-	-1.27533	6.29069	21.2025	0.00070509	0.00207812
X	312692	312770	-	-1.33845	7.52017	46.0387	2.612e-05	0.000135501
X	313915	313999	-	1.40509	6.5012	20.539	0.000795879	0.00228616
X	314854	314925	-	1.72254	7.61308	75.6945	2.38896e-06	2.07498e-05
X	330131	330227	-	1.85366	5.96165	27.2905	0.000258437	0.000892514
X	338155	338229	+	2.43836	8.30599	161.711	4.73966e-08	1.02961e-06
X	342416	342515	+	-1.60631	8.98778	72.1736	3.026e-06	2.53434e-05
X	348633	348735	-	1.21847	7.7198	24.9037	0.000375022	0.00121414
X	355972	356011	+	7.70476	5.571	40.9747	0.000107288	0.000422383
X	36277	36293	-	-7.08297	4.74469	60.2937	2.30224e-05	0.000122754
X	37903	37952	+	-1.54326	6.52826	28.2696	0.000223362	0.000788164
X	381249	381336	+	2.98424	7.97212	120.918	2.19037e-07	3.2896e-06
X	382727	382965	+	8.05168	5.84877	23.0088	0.000887173	0.00251572
X	383785	383820	+	-3.43438	6.26476	34.1302	0.000100183	0.000398927
X	400483	400523	-	1.77325	5.68189	16.5185	0.00176496	0.00449883
X	403543	403613	+	4.40672	5.76003	46.0099	2.61957e-05	0.000135749
X	419587	419637	-	-2.18665	5.64368	22.7367	0.000538032	0.00165386
X	438833	438870	+	-1.41402	7.54761	60.7659	7.0223e-06	4.88848e-05
X	448691	448825	-	5.32156	7.42338	111.608	3.32078e-07	4.52631e-06
X	450882	450936	+	-1.43957	6.32771	17.8896	0.00132777	0.00352478
X	452254	452452	+	1.99364	7.77014	68.513	3.91167e-06	3.07997e-05
X	460193	460217	-	1.04022	5.94872	7.24948	0.0204755	0.0367245
X	466212	466227	-	-2.11803	6.02385	43.2636	3.4762e-05	0.000169152
X	469729	469779	+	1.34596	6.96488	41.7744	4.07767e-05	0.000192081
X	471623	471841	-	1.37504	8.98705	75.7214	2.38474e-06	2.07498e-05
X	478291	478328	+	1.50133	5.56522	13.5365	0.00346593	0.00800817
X	496572	496663	+	1.17528	8.14121	19.1827	0.0010282	0.0028422
X	497324	497354	+	1.49383	6.45608	25.2697	0.000353636	0.00115567
X	49894	50158	-	1.48564	8.46268	105.087	4.53159e-07	5.83353e-06
X	503936	503987	+	1.49208	6.29231	21.8847	0.000624198	0.00186684
X	513811	513842	-	-1.59286	5.76041	22.4772	0.000562703	0.00171669
X	521482	521532	-	6.80603	4.84843	37.9034	0.000144755	0.000544343
X	528461	528516	-	1.64739	6.52326	30.4711	0.000163046	0.00060379
X	531977	532081	+	1.22744	7.60784	27.3011	0.000258025	0.000891724
X	538713	538762	+	1.03584	6.01584	10.7743	0.00704459	0.0147563
X	54354	54376	+	-2.58176	5.99849	51.8375	1.5006e-05	8.77637e-05
X	547224	547340	+	3.06112	5.45754	13.0489	0.00390271	0.00886581
X	550191	550248	+	2.82882	5.47198	23.3626	0.0004836	0.00151234
X	555137	555185	+	-3.45764	5.53615	38.7688	5.70903e-05	0.000253237
X	559368	559395	+	1.17504	6.778	18.7647	0.00111537	0.00303885
X	569408	569477	-	-1.37892	7.20443	50.3861	1.71526e-05	9.69659e-05
X	570617	570705	-	-3.04613	6.8891	128.049	1.62394e-07	2.61659e-06
X	572940	572976	-	2.55255	6.36323	43.632	3.34395e-05	0.000164527
X	581611	581699	-	1.28329	7.05383	22.8993	0.000523222	0.00161548
X	58814	58882	-	-3.98072	5.86326	50.9896	1.62188e-05	9.28476e-05
X	598650	598735	+	-4.03032	6.33669	83.2959	1.47982e-06	1.40915e-05
X	600295	600328	+	6.83215	4.88401	43.3884	8.58826e-05	0.000352068
X	605791	605891	-	2.82179	7.31412	91.5098	9.19698e-07	1.00342e-05
X	607375	607489	-	2.74144	7.60592	174.382	3.17097e-08	7.75374e-07
X	60771	60838	+	-2.65501	6.69413	69.006	3.77614e-06	2.98776e-05
X	608273	608309	+	-2.21694	7.60737	159.014	5.18271e-08	1.1061e-06
X	609598	609676	+	10.0809	7.75889	482.479	2.42233e-09	1.51116e-07
X	611073	611197	+	2.17251	9.15996	116.412	2.66896e-07	3.78041e-06
X	612314	612350	+	-4.16561	5.20064	29.7864	0.000179477	0.000653694
X	620681	620766	+	1.51533	7.18254	43.4348	3.41402e-05	0.000166961
X	622762	623071	-	1.15928	9.95243	64.9381	5.08588e-06	3.77305e-05
X	623534	623561	+	-1.36066	6.31661	17.3656	0.0014778	0.00386613
X	628642	628744	-	1.23773	9.57702	76.9954	2.19451e-06	1.92405e-05
X	632953	633028	-	-2.26305	8.08358	118.528	2.4303e-07	3.5513e-06
X	636786	636840	-	-2.8411	5.29429	13.768	0.00327894	0.00763047
X	639995	640166	+	-3.61643	7.59173	206.01	1.297e-08	4.38277e-07
X	640246	640277	+	-2.65245	5.17439	17.6319	0.00139918	0.00368821
X	649698	649782	+	2.26934	5.88877	31.2203	0.000147056	0.00055129
X	651814	651910	+	-2.27512	9.68516	299.496	1.70068e-09	1.35376e-07
X	662748	662848	-	-2.57336	6.51396	75.0078	2.49975e-06	2.14907e-05
X	667368	667456	+	-1.12702	6.48496	11.9518	0.0051476	0.0112395
X	68782	68814	-	-2.06113	5.67369	26.4059	0.000295826	0.00100104
X	700618	700705	-	-2.25749	6.00472	17.6969	0.00138074	0.00364353
X	702410	702497	-	-7.63195	5.21904	59.5616	2.42008e-05	0.000127172
X	703059	703133	-	-2.96954	8.40652	359.701	6.22812e-10	8.66094e-08
X	705597	705755	+	2.01387	9.05441	224.736	8.10977e-09	3.08298e-07
X	707188	707226	+	6.94366	4.97229	49.3395	5.17247e-05	0.000233425
X	71347	71368	+	-2.56218	5.24657	32.0935	0.000130696	0.000498015
X	717533	717611	-	1.10857	5.45688	6.94936	0.0226681	0.0399358
X	727001	727119	+	7.33464	5.30281	42.3755	9.41681e-05	0.000379323
X	727586	727655	+	8.32331	6.13055	89.2284	4.47763e-06	3.38852e-05
X	73420	73471	-	-1.16527	8.10071	49.4689	1.86959e-05	0.000104004
X	73736	73801	+	-2.48448	7.33528	113.202	3.08561e-07	4.261e-06
X	75242	75390	-	-3.37463	9.23462	408.472	3.09146e-10	6.80685e-08
X	75898	75915	+	-1.56904	7.5401	67.2508	4.28559e-06	3.27888e-05
X	79396	79451	-	3.44772	4.99764	20.2795	0.000835106	0.00238476
X	80107	80134	+	1.03665	6.10013	10.3897	0.00783674	0.0161378
X	90679	90777	+	-2.85753	8.77084	352.322	6.97981e-10	8.70865e-08
X	94952	95071	+	-1.26945	7.29339	35.0906	8.87539e-05	0.000362312
XI	100311	100397	+	-1.82122	8.80869	114.926	2.85307e-07	3.98937e-06
XI	107099	107140	+	-2.61217	7.02446	126.529	1.72861e-07	2.75725e-06
XI	109213	109275	+	-2.94919	9.20876	375.733	4.89949e-10	8.29424e-08
XI	125682	125796	+	-1.43406	10.6268	60.2491	7.31825e-06	5.07273e-05
XI	140689	140748	-	2.52905	6.26915	41.8064	4.06352e-05	0.000191786
XI	142894	142911	-	-1.16389	8.4259	63.4774	5.68216e-06	4.13294e-05
XI	144320	144384	+	10.2108	7.88058	528.198	1.59985e-09	1.35376e-07
XI	150710	150763	-	6.92372	4.94034	39.557	0.000122901	0.000473131
XI	155534	155633	+	1.59588	6.47735	10.7619	0.00706872	0.0148005
XI	158543	158801	+	-2.08794	9.02388	243.854	5.21104e-09	2.30517e-07
XI	165934	165965	-	1.39422	8.32347	80.5987	1.74587e-06	1.61509e-05
XI	171200	171316	-	1.83987	8.48136	131.593	1.40754e-07	2.33757e-06
XI	171583	171783	+	1.7789	7.92031	78.0355	2.05235e-06	1.83844e-05
XI	176727	176775	+	-2.77712	6.73128	101.412	5.44148e-07	6.61956e-06
XI	178436	178493	+	1.66787	8.31836	67.5472	4.19415e-06	3.23196e-05
XI	179620	179675	+	1.14276	7.49139	36.0708	7.8638e-05	0.000326217
XI	185010	185069	-	1.22343	6.14271	9.44536	0.0102758	0.0203674
XI	185801	185833	+	7.58206	5.50612	73.6576	1.00579e-05	6.45672e-05
XI	201789	201810	-	-2.09121	6.20695	49.1168	1.93315e-05	0.000106773
XI	203483	203516	+	-2.79672	5.83992	60.0428	7.44047e-06	5.1355e-05
XI	210432	210516	+	1.48063	5.40139	10.9212	0.00676741	0.0142432
XI	21223	21282	+	9.37996	7.11218	223.092	8.03029e-08	1.53237e-06
XI	217188	217316	+	-1.52753	8.03548	84.9646	1.3391e-06	1.31638e-05
XI	219233	219271	-	-1.18444	5.64399	11.9131	0.00519948	0.0113303
XI	220507	220828	+	5.06719	7.17467	86.1706	1.24716e-06	1.25657e-05
XI	22074	22381	+	5.84578	10.0338	827.892	6.09837e-12	9.89156e-09
XI	222894	222924	-	-3.20127	4.86408	28.35	0.000220738	0.000781742
XI	225887	225937	-	-1.43081	7.66377	45.065	2.8828e-05	0.000145687
XI	229898	229939	-	-2.19737	7.16499	99.2816	6.06743e-07	7.20101e-06
XI	230099	230126	-	-2.97439	5.53451	51.5758	1.53686e-05	8.93473e-05
XI	230301	230322	-	-6.84991	4.56348	53.8597	3.64041e-05	0.000174697
XI	245381	245601	-	2.08711	8.47498	125.458	1.80714e-07	2.81844e-06
XI	247672	247793	-	1.95454	8.59944	158.047	5.35344e-08	1.1326e-06
XI	248659	248678	+	-1.24112	5.217	9.21804	0.0109915	0.0215403
XI	25148	25206	+	-4.23001	7.95595	321.789	1.14794e-09	1.07712e-07
XI	256483	256566	-	-2.02604	7.35343	91.0829	9.41808e-07	1.01841e-05
XI	259871	260048	-	7.22174	8.67066	288.355	2.09214e-09	1.4133e-07
XI	261085	261110	+	2.64053	6.83279	58.55	8.4001e-06	5.62614e-05
XI	262092	262192	+	1.00702	7.91493	30.4449	0.000163642	0.000605536
XI	264699	264786	+	3.26122	6.25562	39.9563	4.98622e-05	0.000227394
XI	278250	278299	+	4.19557	6.6037	84.8845	1.34548e-06	1.31798e-05
XI	278967	279070	+	1.41034	9.21019	103.782	4.83262e-07	6.10357e-06
XI	279633	280037	+	6.19562	7.33306	75.0416	2.49416e-06	2.14807e-05
XI	282332	282421	-	-1.14817	9.89913	57.0272	9.5328e-06	6.24315e-05
XI	282812	282898	+	-2.42609	7.48747	84.1475	1.40594e-06	1.35204e-05
XI	284903	284947	+	-1.53284	8.3898	83.3814	1.4722e-06	1.40465e-05
XI	296353	296430	+	1.45395	7.91047	61.7296	6.50726e-06	4.62929e-05
XI	299371	299377	+	-7.38289	5.0002	73.6011	1.00902e-05	6.46891e-05
XI	305070	305097	+	7.62804	5.53967	79.0418	7.48083e-06	5.15605e-05
XI	315876	315982	+	4.58245	6.94453	126.254	1.7484e-07	2.76224e-06
XI	317004	317136	-	1.53531	8.85086	93.1645	8.39565e-07	9.28483e-06
XI	334925	335003	-	-2.04611	8.81835	89.6301	1.02189e-06	1.08262e-05
XI	338023	338188	-	2.66057	5.97668	11.1503	0.00636044	0.0134799
XI	338262	338456	-	3.19376	5.70172	11.852	0.00528262	0.0114909
XI	34128	34151	-	1.21927	6.72043	24.2046	0.000420273	0.00133663
XI	345532	345586	+	7.65609	5.5803	64.8046	1.71186e-05	9.69659e-05
XI	360182	360244	+	2.3068	6.69884	39.1175	5.48468e-05	0.000245073
XI	38147	38230	-	-2.41087	5.6134	22.4548	0.000564892	0.0017212
XI	384749	384847	-	-3.50235	8.3599	311.914	1.36168e-09	1.20472e-07
XI	387418	387519	+	-1.01931	5.92065	7.7245	0.0175001	0.0321462
XI	389884	390020	-	3.84505	7.96736	219.25	9.26882e-09	3.41682e-07
XI	393352	393365	-	-1.3449	5.69412	9.39248	0.0104372	0.0206453
XI	398596	398634	-	-1.76158	6.71878	45.7464	2.69001e-05	0.000138955
XI	407968	408093	-	1.62766	8.81707	102.18	5.23479e-07	6.45626e-06
XI	408428	408499	+	1.32674	6.47865	25.5966	0.000335734	0.00110683
XI	416922	416943	-	-4.84996	5.41061	52.2973	1.43931e-05	8.47241e-05
XI	426165	426263	+	-1.85739	9.08672	85.5416	1.29415e-06	1.28256e-05
XI	428577	428642	-	-3.68523	4.78868	21.6998	0.00064499	0.00192076
XI	431861	431912	+	-3.6847	8.64533	277.362	2.58654e-09	1.57512e-07
XI	435227	435233	+	-1.95756	5.43504	23.2368	0.000494002	0.00154091
XI	437684	437738	+	1.05882	8.49762	45.644	2.71798e-05	0.000140103
XI	452154	452201	+	-1.15824	8.0216	10.4413	0.00772446	0.0159272
XI	457091	457222	-	9.61654	7.33049	254.262	4.45872e-08	9.91455e-07
XI	46305	46396	-	-1.43329	8.21179	66.7567	4.44332e-06	3.37304e-05
XI	463886	463932	+	-1.97924	8.17688	106.344	4.26227e-07	5.60547e-06
XI	473419	473468	-	1.45071	6.44359	16.2352	0.00187535	0.00473558
XI	475907	475958	-	1.33194	8.71288	92.1665	8.86862e-07	9.74147e-06
XI	489705	489810	-	-1.25892	6.89425	28.3748	0.000219935	0.000779463
XI	49829	49866	-	1.1619	6.41426	9.93438	0.00891522	0.0180155
XI	506890	506918	+	7.18913	5.18122	57.7836	2.73824e-05	0.000140997
XI	514960	515020	+	8.02186	5.89338	94.0862	3.57129e-06	2.87238e-05
XI	517546	517552	-	1.09566	6.66023	17.2343	0.00151848	0.00395733
XI	519298	519352	+	-2.0698	7.43642	73.353	2.79254e-06	2.35911e-05
XI	521694	521748	-	-1.2529	7.91502	57.8733	8.88267e-06	5.86473e-05
XI	521936	521970	+	-1.07751	5.85145	9.24007	0.0109196	0.0214426
XI	525074	525109	-	4.08503	6.52857	38.8338	5.66643e-05	0.000251819
XI	527171	527263	-	2.31142	8.25462	185.907	2.2517e-08	6.17283e-07
XI	534039	534102	+	-2.22991	6.04799	36.9523	7.06836e-05	0.000298305
XI	551608	551654	+	-2.38487	8.01987	179.398	2.72508e-08	6.97907e-07
XI	554889	554993	+	-1.63752	6.21863	34.0516	0.000101193	0.00040229
XI	556447	556489	+	-1.94929	6.81357	75.5018	2.41945e-06	2.09485e-05
XI	557666	557689	+	4.06276	5.46856	30.3914	0.000164865	0.000608215
XI	567800	567930	+	2.54105	5.81688	17.3135	0.00149378	0.00390372
XI	579140	579175	+	1.92131	6.45538	33.7113	0.000105706	0.000418183
XI	580759	580811	-	-1.84241	8.5641	86.0383	1.25688e-06	1.25657e-05
XI	582206	582293	+	4.73942	9.35631	583.165	4.30098e-11	3.38119e-08
XI	590313	590337	+	-7.86516	5.41764	93.3911	3.68631e-06	2.93098e-05
XI	592550	592594	-	-2.02381	6.93516	83.8867	1.42809e-06	1.36525e-05
XI	605403	605447	-	-1.00336	6.419	12.2264	0.00479651	0.0105562
XI	608768	608810	+	-1.17383	5.96602	13.2677	0.00369909	0.00845456
XI	611425	611518	+	1.06997	9.14136	34.857	9.1386e-05	0.000371189
XI	618730	618840	-	-2.72081	7.96878	92.9138	8.5116e-07	9.37046e-06
XI	625014	625123	+	7.20646	5.15554	34.7159	0.000201905	0.000724534
XI	626503	626583	+	2.1762	6.60553	37.2357	6.83309e-05	0.000290018
XI	630997	631062	+	6.0586	8.09611	291.356	1.97713e-09	1.39431e-07
XI	635568	635594	+	-2.18419	6.05659	43.0338	3.56185e-05	0.000172196
XI	70507	70560	-	-2.26004	5.40107	13.1926	0.00376749	0.00859072
XI	79882	79971	-	1.40428	7.55522	56.2655	1.01664e-05	6.50299e-05
XI	81005	81019	+	-7.23303	4.87573	58.1748	2.66408e-05	0.000137762
XI	88736	88948	-	3.21319	7.64697	120.975	2.18504e-07	3.2896e-06
XI	91504	91597	-	7.54917	8.61809	356.519	6.53995e-10	8.70865e-08
XI	92281	92399	+	4.10337	6.35355	38.2134	6.08908e-05	0.000265497
XI	93310	93357	-	-1.12924	7.00002	28.2918	0.000222632	0.000786158
XI	93525	93567	-	1.59334	6.45172	30.4059	0.000164531	0.000607902
XI	93626	93672	-	1.50597	7.28217	41.7496	4.08868e-05	0.000192413
XII	1001807	1001864	-	3.27868	5.4439	19.2815	0.0010088	0.00279687
XII	1002415	1002507	+	-1.08897	7.72979	47.7352	2.20837e-05	0.00011874
XII	1006285	1006342	+	-3.17289	7.26065	126.532	1.72842e-07	2.75725e-06
XII	1011959	1012092	-	-1.61738	6.50221	18.1468	0.00126073	0.00337073
XII	1012451	1012476	+	1.08367	7.39248	21.8584	0.000627104	0.00187438
XII	1018924	1018949	-	-2.5577	8.67581	293.377	1.90385e-09	1.39431e-07
XII	1022240	1022343	-	1.63726	6.926	48.9574	1.96274e-05	0.000108285
XII	1027884	1027964	-	-1.17938	6.81977	20.8835	0.000747124	0.00217435
XII	1028758	1028901	+	-2.63233	8.98416	338.235	8.73338e-10	9.88294e-08
XII	1030775	1030825	+	-2.08949	8.24926	134.81	1.23997e-07	2.15302e-06
XII	108078	108277	-	1.57061	10.087	101.444	5.43265e-07	6.61956e-06
XII	116294	116370	+	1.34577	5.96488	11.0344	0.0065625	0.0138599
XII	121291	121324	+	-1.06716	7.24533	25.1355	0.000361306	0.001176
XII	124935	125020	-	1.05343	6.92931	25.9053	0.000319805	0.00106587
XII	125477	125481	+	-1.63699	5.28061	14.9051	0.00251672	0.0061079
XII	131415	131493	-	1.12492	7.8295	38.1915	6.10468e-05	0.000265939
XII	131658	131729	+	-2.66415	8.64075	257.342	3.88968e-09	1.95126e-07
XII	146253	146293	+	-1.99341	5.60161	28.4024	0.000219047	0.000777449
XII	147823	147866	+	1.24355	6.43031	20.6437	0.000780679	0.00225313
XII	156335	156435	-	-2.30197	7.87749	141.792	9.50614e-08	1.77229e-06
XII	157739	157797	-	-1.43424	7.90131	76.6256	2.24783e-06	1.9602e-05
XII	159985	160039	+	1.51253	6.83961	34.6486	9.38114e-05	0.000378199
XII	166131	166194	-	-1.96211	6.12274	35.1273	8.8348e-05	0.000360958
XII	166349	166445	+	-1.86946	7.68404	56.2612	1.01701e-05	6.50299e-05
XII	177590	177655	+	-1.59337	7.36694	70.3475	3.43444e-06	2.80402e-05
XII	183396	183468	-	-1.14524	6.76123	25.3217	0.000350712	0.00114689
XII	183551	183655	+	-1.20899	8.28327	6.73267	0.0244268	0.0425414
XII	184873	184991	-	-1.4677	8.28158	86.0448	1.25639e-06	1.25657e-05
XII	187198	187212	-	-1.24515	5.07704	8.99448	0.0117539	0.0227476
XII	193453	193477	-	2.23167	5.19499	12.4341	0.00454981	0.0101139
XII	201341	201547	-	1.22731	8.53572	47.113	2.34723e-05	0.000124148
XII	202205	202368	-	-3.2099	6.58938	30.6716	0.000158574	0.000588575
XII	202392	202648	-	-2.54614	9.99715	371.267	5.23284e-10	8.29424e-08
XII	204909	204983	+	1.99346	5.59182	20.6712	0.000776739	0.00224386
XII	21761	21830	-	9.18171	6.92639	242.674	5.50144e-08	1.15388e-06
XII	224549	224603	-	1.38853	6.4271	19.5978	0.000949498	0.00266758
XII	225181	225266	-	1.84196	8.57335	86.83	1.20004e-06	1.22676e-05
XII	22638	22726	-	-4.27336	5.73793	50.9971	1.62075e-05	9.28476e-05
XII	229638	229728	-	-2.40487	5.27007	14.1684	0.00298289	0.00706314
XII	230468	230549	-	-2.86764	6.47686	12.6562	0.00430234	0.00963422
XII	232798	232856	-	-1.53256	5.4395	10.6174	0.00735576	0.0152964
XII	233056	233153	-	-7.01158	4.68723	52.4522	4.04976e-05	0.000191322
XII	233301	233352	-	-2.27687	5.55473	17.354	0.00148132	0.00387325
XII	233937	234153	-	-1.46775	10.3075	93.3184	8.32541e-07	9.23413e-06
XII	242128	242226	+	-2.92979	9.65229	359.685	6.22961e-10	8.66094e-08
XII	246950	247028	-	-1.08665	9.07877	57.739	8.98229e-06	5.92247e-05
XII	248351	248480	-	5.1265	7.23446	101.597	5.39101e-07	6.59112e-06
XII	253776	253804	+	-1.66711	7.22509	51.3209	1.57317e-05	9.09849e-05
XII	259430	259508	-	-2.7054	7.30856	67.7345	4.13753e-06	3.21104e-05
XII	260915	260971	+	-2.23265	7.9743	98.4566	6.3323e-07	7.38272e-06
XII	263123	263186	+	-2.48082	9.67814	204.774	1.33971e-08	4.43472e-07
XII	266912	266979	-	-1.18471	8.00067	52.4974	1.41356e-05	8.35768e-05
XII	270932	271008	+	-1.03018	9.66651	62.0408	6.35053e-06	4.55106e-05
XII	278617	278659	-	-1.12259	5.61015	10.0601	0.00860066	0.0174742
XII	281699	281782	-	-3.67941	5.6103	40.7996	4.53799e-05	0.000209881
XII	282478	282527	-	-1.03736	8.4323	37.2713	6.8042e-05	0.000289416
XII	282869	282919	+	-1.64289	9.07157	117.243	2.57207e-07	3.6703e-06
XII	287423	287491	+	2.8757	5.32313	23.1155	0.000504276	0.00156693
XII	287918	287993	+	2.95485	6.89643	97.1458	6.78169e-07	7.78295e-06
XII	29474	29527	-	1.36618	5.68929	10.7828	0.00702816	0.0147283
XII	296182	296263	-	-2.93678	6.03439	59.2439	7.93696e-06	5.42433e-05
XII	341610	341614	+	7.13227	5.1186	54.2183	3.5443e-05	0.000171778
XII	346541	346585	+	1.18829	7.03232	20.6986	0.000772844	0.00223982
XII	363833	363893	-	-4.27257	5.28446	29.5008	0.000186904	0.0006777
XII	371271	371278	+	-4.78804	5.69135	54.9025	1.14284e-05	7.11065e-05
XII	384492	384591	-	1.68591	8.20743	78.9424	1.93718e-06	1.76193e-05
XII	388253	388335	-	1.37706	7.80664	38.2466	6.06552e-05	0.000265421
XII	388907	388933	+	2.3256	5.25049	14.106	0.00302691	0.0071511
XII	389078	389082	-	7.28752	5.26586	47.2091	6.16307e-05	0.000267525
XII	389581	389596	+	7.00929	5.00661	39.4734	0.000123906	0.000476623
XII	395550	395599	-	1.32876	5.79363	9.59015	0.00984874	0.019649
XII	416677	416742	-	1.41517	8.91279	31.8802	0.000134485	0.000510057
XII	425146	425172	+	2.19234	6.07837	32.797	0.000119057	0.000459786
XII	433755	433770	-	-1.46401	5.0561	10.2347	0.00818551	0.016756
XII	439867	439914	-	1.44272	7.13351	38.4934	5.8939e-05	0.000259076
XII	440279	440449	+	-2.10636	9.91308	117.797	2.50975e-07	3.60249e-06
XII	442711	442760	-	2.59142	6.71364	63.3808	5.72444e-06	4.15748e-05
XII	449609	449644	-	6.86923	4.92243	46.1088	6.76477e-05	0.000288243
XII	449738	449742	+	-1.31227	4.91515	8.65402	0.0130393	0.0248334
XII	452130	452256	-	2.43114	5.77521	9.19201	0.0110772	0.0216652
XII	453304	454533	-	1.09044	11.1354	10.3231	0.00798446	0.0163934
XII	458098	458100	-	-1.5804	5.28643	11.6313	0.00559646	0.0120818
XII	458241	458298	-	-1.14646	5.97555	12.0346	0.00503863	0.0110392
XII	459384	459685	-	1.95459	10.3598	110.559	3.48705e-07	4.69356e-06
XII	460624	460675	-	2.06062	7.12591	45.2663	2.8242e-05	0.000143152
XII	48621	48710	-	-2.58715	9.52437	323.268	1.11945e-09	1.07712e-07
XII	487690	487803	+	1.10955	6.26286	13.6559	0.00336798	0.00780785
XII	493832	493888	+	7.9313	5.81	98.2099	2.9719e-06	2.49336e-05
XII	498841	498962	+	-2.56769	10.0491	240.806	5.57905e-09	2.39867e-07
XII	504521	504590	+	10.7208	8.36118	322.031	1.53078e-08	4.77486e-07
XII	513832	513856	-	1.3895	8.51616	100.518	5.69443e-07	6.8757e-06
XII	514768	514796	-	-3.21655	6.17051	33.4008	0.000110033	0.000430749
XII	515175	515226	+	-5.17268	7.93086	522.821	7.88906e-11	3.48983e-08
XII	522614	522720	+	-2.11096	9.21038	246.044	4.96425e-09	2.27887e-07
XII	523559	523604	+	-2.02806	6.77141	66.4721	4.53729e-06	3.42301e-05
XII	53863	54021	-	1.22898	9.24146	29.5014	0.000186887	0.0006777
XII	540537	540616	-	1.0981	6.9833	16.7886	0.00166676	0.00428759
XII	543295	543353	-	-1.01154	7.84737	20.713	0.000770797	0.00223599
XII	543884	543945	+	-2.38219	6.84109	49.1523	1.92663e-05	0.000106732
XII	546041	546078	+	-3.57796	7.38932	225.875	7.89105e-09	3.02345e-07
XII	553683	553769	-	4.41924	8.24657	205.551	1.31268e-08	4.40516e-07
XII	554392	554485	+	1.26983	7.29455	25.8374	0.000323233	0.00107509
XII	564581	564589	-	2.54857	5.26382	17.0417	0.00158055	0.00409528
XII	581778	581821	-	-1.88072	6.81895	45.4677	2.76698e-05	0.000141579
XII	586308	586366	+	-1.65811	6.19401	8.79679	0.0124809	0.0239763
XII	593190	593282	-	1.14229	7.22569	28.7911	0.00020698	0.000740561
XII	595500	595578	+	2.47499	5.93008	21.703	0.000644625	0.00192076
XII	596597	596686	+	1.3778	6.08422	6.53367	0.0261874	0.0452997
XII	596753	596845	+	3.90747	6.12519	23.0652	0.000508614	0.00157638
XII	603863	603908	+	1.62504	5.66232	13.1117	0.00384295	0.00874232
XII	604941	605005	-	-1.05299	7.19653	18.4888	0.00117768	0.00317662
XII	614562	614584	-	2.40098	5.78691	32.5683	0.000122702	0.000472737
XII	614654	614705	+	1.26723	6.66462	22.7429	0.000537463	0.00165316
XII	620405	620468	+	1.29049	6.5912	20.3048	0.000831173	0.00237494
XII	626336	626375	-	-1.62305	6.95258	54.187	1.21645e-05	7.4269e-05
XII	626498	626575	+	-7.45661	5.06753	64.7502	1.7178e-05	9.697e-05
XII	626931	626971	-	-1.09164	5.8855	10.6657	0.00725819	0.0151495
XII	636727	636766	+	-2.64745	7.95795	186.582	2.20839e-08	6.16185e-07
XII	63708	63760	-	1.23969	7.64222	43.0419	3.55879e-05	0.000172196
XII	639356	639432	+	-4.30257	4.95026	30.745	0.000156973	0.000583075
XII	644995	645111	-	1.49406	7.09121	41.9084	4.01878e-05	0.00019025
XII	65256	65321	-	1.86043	9.20758	154.178	6.10568e-08	1.2536e-06
XII	655334	655407	+	1.76426	5.41395	12.1552	0.00488481	0.0107408
XII	678142	678205	+	1.87344	7.32228	74.7488	2.5431e-06	2.1742e-05
XII	681068	681123	+	2.28691	8.06096	146.475	8.0079e-08	1.53237e-06
XII	682564	682622	+	1.09602	7.46134	30.293	0.000167143	0.000615219
XII	682633	682650	-	2.83337	5.29162	14.1028	0.00302917	0.00715184
XII	696860	696967	-	-2.17641	7.1858	99.0639	6.13605e-07	7.24709e-06
XII	705063	705188	+	1.10317	6.94045	9.75233	0.00939515	0.0188523
XII	707038	707136	-	3.0121	7.13161	121.888	2.10107e-07	3.18498e-06
XII	713102	713224	-	-1.00321	9.37906	56.5127	9.9555e-06	6.42487e-05
XII	721370	721528	-	-3.20817	8.85405	354.478	6.74967e-10	8.70865e-08
XII	722331	722478	-	1.10276	9.07347	65.7016	4.8036e-06	3.61272e-05
XII	73166	73211	-	-2.02682	7.24222	95.4525	7.41899e-07	8.37606e-06
XII	737508	737632	-	1.92323	8.88914	128.169	1.61603e-07	2.6125e-06
XII	747132	747257	-	10.4597	8.11488	540.145	1.44388e-09	1.25463e-07
XII	764140	764216	-	-1.76786	8.33626	103.691	4.85425e-07	6.10357e-06
XII	778903	778988	-	6.84319	4.88777	45.3825	7.20133e-05	0.000302605
XII	779144	779193	+	1.03792	6.17024	8.17709	0.0151329	0.028311
XII	781310	781486	-	-1.42209	9.67468	58.3191	8.56119e-06	5.66786e-05
XII	796355	796406	-	-2.24522	8.58781	178.275	2.81807e-08	7.15299e-07
XII	805812	805900	+	-2.19481	8.34682	171.272	3.49061e-08	8.2453e-07
XII	819267	819314	+	-3.50335	6.94541	62.8109	5.98138e-06	4.32473e-05
XII	820392	820511	+	1.33892	7.92486	54.8889	1.14419e-05	7.11065e-05
XII	822624	822669	-	6.78268	4.84101	43.6491	8.38958e-05	0.000345086
XII	823243	823337	+	8.28269	6.11755	128.802	9.17841e-07	1.00342e-05
XII	830933	831016	+	1.25403	7.14991	24.174	0.000422395	0.0013425
XII	839313	839340	-	-1.46792	7.61841	58.7138	8.28792e-06	5.58574e-05
XII	840232	840313	+	1.91976	7.96423	98.5464	6.30282e-07	7.37248e-06
XII	844166	844264	+	-2.84261	7.15683	136.56	1.15869e-07	2.04282e-06
XII	849820	849850	+	3.4997	5.03987	19.3912	0.000987738	0.00275119
XII	853423	853451	+	-1.86597	5.83972	19.0842	0.00104799	0.00287837
XII	855809	855882	+	-1.44665	8.20468	86.1446	1.24906e-06	1.25657e-05
XII	867205	867218	+	-3.59038	5.91014	48.6705	2.01738e-05	0.000110922
XII	87159	87205	+	-1.03532	7.39454	25.1406	0.000361011	0.00117582
XII	871646	871692	+	-1.24513	6.58543	24.8499	0.000378296	0.00122393
XII	874828	874833	-	7.05983	5.07115	54.7049	3.41871e-05	0.000167023
XII	877374	877388	-	1.38421	5.93151	17.9895	0.00130124	0.00346761
XII	892871	892894	-	-2.51559	6.51019	74.4287	2.59791e-06	2.20618e-05
XII	89651	89779	+	8.58806	6.33552	28.3131	0.000427679	0.00135752
XII	898094	898138	+	-5.44786	6.30318	87.177	1.17608e-06	1.21246e-05
XII	909983	910075	-	1.11626	8.17235	51.3121	1.57443e-05	9.09849e-05
XII	914908	914924	-	-2.17479	5.88836	26.2249	0.000304242	0.00102524
XII	920379	920380	-	-1.20799	5.33564	7.07239	0.0217369	0.0386615
XII	924436	924519	-	-1.55067	7.97088	57.3711	9.26199e-06	6.09038e-05
XII	929766	929791	+	-1.17648	5.19917	7.35699	0.0197523	0.035757
XII	931749	931846	-	-2.58547	9.18506	264.718	3.3353e-09	1.76789e-07
XII	937266	937297	-	-4.61902	5.21601	42.9582	3.59053e-05	0.000173309
XII	951098	951153	+	-10.5722	8.07421	696.827	4.47957e-10	8.29424e-08
XII	963680	963787	+	-1.43152	8.34109	45.309	2.81194e-05	0.000142768
XII	97085	97148	-	2.54233	8.52838	96.4237	7.04524e-07	8.04745e-06
XII	97190	97287	-	3.08985	7.79499	61.9893	6.37617e-06	4.55601e-05
XII	97296	97643	-	-2.36411	10.0901	214.26	1.04956e-08	3.72787e-07
XII	981460	981460	-	1.09707	5.50552	7.27541	0.0202982	0.0364873
XII	98852	98928	-	1.22335	7.25202	22.8722	0.000525664	0.00162096
XII	990866	990989	+	3.30707	7.37809	124.078	1.91468e-07	2.93907e-06
XII	992051	992153	+	1.47357	5.22649	11.611	0.00562642	0.0121357
XIII	10137	10166	+	4.18583	7.5836	284.875	2.23554e-09	1.47002e-07
XIII	102117	102192	+	8.65257	6.45892	80.5933	6.89244e-06	4.82466e-05
XIII	104160	104242	-	1.98211	8.68198	186.264	2.2287e-08	6.16185e-07
XIII	104628	104685	+	-1.01954	7.45316	16.3511	0.00182922	0.00463351
XIII	108682	108709	+	-1.97317	4.71597	10.0025	0.0087431	0.017734
XIII	110972	111002	+	1.65304	5.45477	13.4561	0.00353379	0.00812638
XIII	111811	111860	+	-1.51327	6.7422	24.3028	0.000413541	0.00132121
XIII	120805	120930	-	2.85745	6.6552	17.5511	0.00142251	0.00373754
XIII	124132	124224	-	-2.85297	8.82011	274.758	2.72305e-09	1.6159e-07
XIII	131595	131711	-	-2.06393	7.47216	61.1431	6.81518e-06	4.80611e-05
XIII	13179	13218	-	2.39371	7.55823	21.9795	0.000613849	0.00184041
XIII	132008	132070	+	4.76958	6.05767	48.3886	2.07282e-05	0.000112774
XIII	13266	13287	-	-7.66777	5.24357	90.591	4.1977e-06	3.23196e-05
XIII	137441	137505	+	1.86862	5.19333	7.90008	0.0165327	0.0306237
XIII	146405	146482	+	-2.21921	8.59688	150.096	7.03786e-08	1.40353e-06
XIII	148129	148150	-	-1.80597	4.93221	14.0425	0.00307247	0.0072295
XIII	164220	164299	-	-8.55882	6.05649	143.029	5.79713e-07	6.98239e-06
XIII	164576	164625	+	-7.01467	4.68803	50.9731	4.54181e-05	0.000209881
XIII	16687	16748	-	2.54944	8.98203	301.462	1.64091e-09	1.35376e-07
XIII	167309	167357	-	10.5814	8.23275	519.599	1.72489e-09	1.35376e-07
XIII	170356	170394	+	-1.85474	6.71361	25.8514	0.000322524	0.00107346
XIII	187159	187291	+	1.84898	6.4449	10.5224	0.00755196	0.0156374
XIII	192634	192844	+	7.18498	8.27883	165.367	4.2082e-08	9.56873e-07
XIII	198386	198424	+	1.97951	5.5642	13.5948	0.00341769	0.00791551
XIII	205595	205624	+	-1.11693	6.38269	16.5281	0.00176133	0.00449431
XIII	213876	213986	-	1.40898	7.91412	31.5119	0.000141339	0.00053273
XIII	216483	216648	+	2.62027	6.14941	30.1781	0.00016985	0.000624128
XIII	217241	217362	+	1.26117	8.21829	41.4471	4.2258e-05	0.000197151
XIII	220069	220522	+	1.20511	10.4995	48.2484	2.10106e-05	0.000113723
XIII	221317	221345	+	-1.4454	5.70161	17.4998	0.00143753	0.00377043
XIII	223245	223374	-	-4.19452	5.70043	46.9944	2.37485e-05	0.000125337
XIII	223794	223909	-	-2.4077	9.76621	227.144	7.65554e-09	2.98015e-07
XIII	225831	225886	+	-2.38324	8.72059	235.198	6.33939e-09	2.61419e-07
XIII	228868	228918	+	-1.93338	6.10003	32.1143	0.000130331	0.000497016
XIII	233419	233469	+	-1.29467	7.50522	51.9577	1.48428e-05	8.69136e-05
XIII	23694	23710	-	-1.08536	7.15153	11.8486	0.00528733	0.011496
XIII	241772	241806	-	-1.31751	7.14917	25.9281	0.000318666	0.00106353
XIII	243184	243217	+	-1.32221	5.28042	9.16101	0.0111803	0.0218136
XIII	246311	246496	+	4.62296	5.90476	20.6776	0.000775834	0.00224314
XIII	251542	251571	-	1.6397	6.69663	33.3027	0.000111442	0.000433821
XIII	253679	253986	+	1.60723	9.69421	53.1768	1.33008e-05	7.99036e-05
XIII	262659	262717	-	1.32004	9.2686	68.0456	4.04548e-06	3.16484e-05
XIII	271484	271528	-	-2.58174	5.99765	45.9823	2.62682e-05	0.00013598
XIII	283638	283649	+	-6.89983	4.59726	46.696	6.43522e-05	0.000275407
XIII	288035	288054	+	-2.42846	6.63187	86.1123	1.25143e-06	1.25657e-05
XIII	29830	29897	-	1.81045	7.55858	76.6725	2.24097e-06	1.95773e-05
XIII	30575	30591	+	-1.82379	5.66191	19.409	0.00098438	0.00274341
XIII	305897	305910	-	-1.02508	5.59045	7.34265	0.0198469	0.0358882
XIII	310179	310210	+	6.96812	5.00483	45.9861	6.83622e-05	0.000290018
XIII	315232	315410	+	1.18029	7.72269	36.9224	7.09375e-05	0.000298859
XIII	32198	32291	+	3.32664	6.04804	32.6107	0.000122015	0.000470838
XIII	350289	350413	+	3.56437	6.37679	38.0859	6.18047e-05	0.000267802
XIII	351967	352216	-	1.41114	9.32507	102.989	5.02689e-07	6.27201e-06
XIII	361841	361921	-	-1.79148	4.89976	14.0768	0.00304777	0.00718182
XIII	362641	362698	-	-1.21763	9.09208	87.0415	1.18537e-06	1.21909e-05
XIII	370515	370577	-	-1.29541	8.07994	40.0495	4.9342e-05	0.000225656
XIII	382872	382925	-	2.26153	6.05949	25.9632	0.00031692	0.00105916
XIII	388298	388325	-	6.74345	4.81431	42.2287	9.54479e-05	0.000383842
XIII	396384	396460	-	-2.61427	5.93677	21.4269	0.000677183	0.00200314
XIII	413111	413111	+	-1.41284	5.31327	10.2238	0.00821079	0.0167873
XIII	424919	424973	+	-1.04711	8.30312	39.1586	5.45894e-05	0.000244147
XIII	439119	439198	+	1.71234	6.04437	26.8491	0.000276352	0.00094566
XIII	43992	44040	+	-1.22671	5.59921	6.963	0.0225625	0.0397787
XIII	442469	442513	+	-1.60976	5.08079	11.5652	0.00569483	0.0122453
XIII	448087	448158	-	2.15576	7.14043	79.1186	1.91569e-06	1.74892e-05
XIII	449132	449272	+	4.03502	8.59308	495.524	1.06209e-10	3.69152e-08
XIII	453495	453561	-	2.59338	5.09839	14.7894	0.00258389	0.00625045
XIII	453965	454017	+	-2.36293	6.6829	77.4504	2.13095e-06	1.87997e-05
XIII	458358	458402	+	4.10579	7.504	145.019	8.44181e-08	1.59216e-06
XIII	465901	465983	+	1.44502	6.16295	23.4055	0.000480112	0.00150239
XIII	472660	472705	-	-3.20511	8.20102	370.611	5.28404e-10	8.29424e-08
XIII	475402	475536	-	1.28447	7.93778	50.0398	1.7717e-05	9.94358e-05
XIII	480858	480914	+	2.0853	6.93314	59.1648	7.98821e-06	5.44973e-05
XIII	482964	483064	+	5.0516	9.72546	609.055	3.37796e-11	3.38119e-08
XIII	483823	483909	+	-1.6489	7.24482	45.4727	2.76556e-05	0.000141579
XIII	491983	492054	-	1.11256	8.27209	56.6724	9.82194e-06	6.34709e-05
XIII	496583	496630	-	-3.89194	6.07183	53.401	1.30381e-05	7.85193e-05
XIII	497445	497529	-	1.76186	7.32401	54.898	1.14329e-05	7.11065e-05
XIII	500683	500718	-	-4.69287	6.8212	84.6304	1.36597e-06	1.32937e-05
XIII	502107	502169	+	-2.1177	6.20808	47.6864	2.21889e-05	0.000118944
XIII	502749	502823	-	8.42271	6.23073	125.336	1.03399e-06	1.09008e-05
XIII	509302	509334	-	-4.80664	5.36998	41.0542	4.41212e-05	0.000204276
XIII	511262	511296	+	1.50312	7.81785	56.4118	1.00409e-05	6.4543e-05
XIII	517781	517820	+	7.45928	5.41064	65.1598	1.67369e-05	9.51868e-05
XIII	523635	523678	+	-2.1986	7.85918	122.025	2.08876e-07	3.17622e-06
XIII	532026	532077	+	-1.49114	5.47748	12.563	0.00440419	0.00982614
XIII	534699	534773	-	-1.96488	7.92119	84.2721	1.3955e-06	1.34732e-05
XIII	535603	535657	-	-2.98633	5.64909	55.4134	1.09349e-05	6.85687e-05
XIII	539987	540112	-	1.52087	8.88261	98.1587	6.43127e-07	7.43339e-06
XIII	541353	541446	+	5.86526	7.06418	61.0312	6.87588e-06	4.82466e-05
XIII	544975	545047	-	1.0257	6.65108	8.96491	0.0118593	0.0228907
XIII	545895	545958	+	1.13593	7.46117	23.3281	0.000486429	0.00151923
XIII	551191	551259	-	-2.50684	9.51361	196.872	1.65558e-08	5.0667e-07
XIII	551862	551933	+	-2.67154	9.11694	230.709	7.03671e-09	2.80661e-07
XIII	556449	556615	-	2.66923	7.65195	103.069	5.00685e-07	6.26307e-06
XIII	558531	558623	-	-1.44282	9.29188	107.99	3.93755e-07	5.22073e-06
XIII	559094	559198	+	1.58488	6.73624	24.315	0.000412718	0.00131982
XIII	563013	563105	+	1.50378	7.2673	51.0538	1.61231e-05	9.26269e-05
XIII	56465	56584	+	-2.53476	6.51469	67.6259	4.17024e-06	3.22538e-05
XIII	571014	571046	-	1.45127	6.47435	22.1852	0.000592063	0.0017924
XIII	574825	574893	-	1.00684	6.59772	7.16869	0.0210398	0.0375705
XIII	584053	584118	-	1.67321	5.75334	18.2385	0.00123781	0.00331855
XIII	594594	594743	-	-1.01453	6.84735	11.4192	0.00591913	0.0126633
XIII	600881	600966	-	3.10163	8.63327	172.442	3.36604e-08	8.1085e-07
XIII	603091	603123	-	2.40205	7.38181	50.6448	1.67447e-05	9.51868e-05
XIII	610368	610413	-	4.6416	8.51578	604.88	3.50972e-11	3.38119e-08
XIII	610700	611110	+	7.60282	9.57353	545.168	6.25373e-11	3.38119e-08
XIII	611625	611638	+	-1.26111	5.17911	8.77602	0.0125603	0.0241099
XIII	623867	624143	-	2.32215	7.76355	99.0049	6.15479e-07	7.25162e-06
XIII	624445	624487	+	1.86019	5.17416	16.5503	0.00175302	0.00447779
XIII	628115	628217	+	2.76491	7.61777	74.581	2.57166e-06	2.19154e-05
XIII	632528	632937	+	2.10783	8.12458	16.3363	0.00183504	0.00464583
XIII	637007	637112	-	1.70203	7.41137	51.6369	1.5283e-05	8.90622e-05
XIII	637349	637458	+	-1.13368	6.68184	13.022	0.00392858	0.00891211
XIII	645406	645439	-	1.08708	6.86146	14.2331	0.00293809	0.00697402
XIII	645611	645656	+	1.46974	8.48878	101.627	5.38268e-07	6.59112e-06
XIII	651082	651167	+	-2.02419	9.37663	186.428	2.21822e-08	6.16185e-07
XIII	652275	652309	+	-2.79453	5.41777	37.4574	6.65538e-05	0.00028408
XIII	652820	652974	-	1.88974	7.73032	65.0989	5.02482e-06	3.75588e-05
XIII	653914	654029	+	-2.70491	9.01529	90.8424	9.54538e-07	1.02989e-05
XIII	654956	655059	+	2.25578	7.03532	71.0844	3.26225e-06	2.69968e-05
XIII	664611	664689	+	2.04168	6.30987	25.6475	0.000333043	0.0011002
XIII	667458	667531	+	-1.85396	7.64342	30.3444	0.000165948	0.000611283
XIII	675734	675793	+	2.83019	6.66288	64.9256	5.09064e-06	3.77305e-05
XIII	701664	701774	+	-4.46019	8.08506	399.307	3.50372e-10	6.85997e-08
XIII	706889	706968	-	1.18394	6.61652	16.1036	0.00192939	0.00485959
XIII	707058	707235	+	1.14241	9.0452	38.3009	6.02731e-05	0.000264137
XIII	716313	716360	-	-1.01149	6.34178	12.6162	0.00434568	0.00972681
XIII	731171	731243	-	-1.89	5.65088	21.4287	0.000676968	0.00200314
XIII	73123	73286	+	7.58062	5.46605	39.2167	0.000127052	0.000486416
XIII	732356	732425	+	-1.83599	9.2441	141.637	9.56096e-08	1.77571e-06
XIII	742759	742783	-	-1.237	5.85649	11.217	0.00624736	0.0132766
XIII	746225	746373	+	2.8552	6.35635	53.0882	1.34063e-05	8.01413e-05
XIII	749713	749753	-	-4.34853	6.91391	91.124	9.39654e-07	1.01834e-05
XIII	754228	754330	-	-2.58914	9.1921	301.22	1.64812e-09	1.35376e-07
XIII	759078	759127	-	-2.23256	4.77299	13.3285	0.00364474	0.00835389
XIII	759517	759595	+	-3.11581	6.57175	118.433	2.44046e-07	3.55483e-06
XIII	762372	763117	-	1.45868	9.74517	45.3671	2.79538e-05	0.000142296
XIII	770498	770528	-	-1.63881	5.46072	15.0699	0.00242455	0.00589893
XIII	770734	770810	+	1.56568	6.92617	28.151	0.000227295	0.000799036
XIII	773248	773434	+	2.36232	7.75229	87.5288	1.15237e-06	1.19053e-05
XIII	77442	77457	+	3.71981	5.20918	25.1078	0.00036291	0.00117964
XIII	774690	774760	+	1.44037	9.97545	63.599	5.62948e-06	4.10509e-05
XIII	775734	775815	-	-4.00961	5.03432	27.6148	0.000246144	0.00085485
XIII	777916	778034	+	1.13834	8.62023	54.1702	1.21824e-05	7.42851e-05
XIII	779135	779184	-	1.8153	7.93859	96.2429	7.1131e-07	8.087e-06
XIII	789839	789888	-	-1.18393	8.9554	43.5104	3.38694e-05	0.000166137
XIII	798476	798550	+	-1.76921	7.38087	93.3064	8.33084e-07	9.23413e-06
XIII	79885	79904	+	-1.60423	5.23754	9.60306	0.00981169	0.0195912
XIII	804375	804456	+	-1.48651	9.30165	77.7818	2.086e-06	1.85566e-05
XIII	807564	807605	-	3.60967	6.41415	55.8862	1.05003e-05	6.64993e-05
XIII	820137	820159	+	-1.35168	5.85443	12.8031	0.00414741	0.00933023
XIII	82234	82270	+	-1.12367	8.17075	55.9283	1.04627e-05	6.63773e-05
XIII	83058	83090	+	-1.48242	6.86906	18.821	0.00110313	0.00301394
XIII	831342	831436	-	1.67552	5.9704	15.3477	0.00227802	0.00560691
XIII	832268	832290	+	-1.62925	5.78272	18.6635	0.00113776	0.00308777
XIII	836819	836859	-	-1.6163	5.41633	6.83807	0.0235517	0.0412091
XIII	841676	841714	-	-1.7342	5.84521	8.76402	0.0126065	0.024189
XIII	851609	851661	-	-3.39898	6.35431	109.618	3.64469e-07	4.87227e-06
XIII	860980	861107	-	-1.02378	8.67889	27.153	0.000263867	0.000908688
XIII	861842	861922	+	1.36711	8.49733	75.6736	2.39224e-06	2.07498e-05
XIII	86709	86778	-	1.13004	7.17712	19.169	0.00103092	0.0028422
XIII	873448	874233	-	11.1356	8.75578	132.066	8.22649e-07	9.1602e-06
XIII	874274	874404	-	11.251	8.87022	692.529	4.60897e-10	8.29424e-08
XIII	874916	875056	+	5.79006	6.97966	137.764	1.10641e-07	1.97208e-06
XIII	880313	880413	-	-2.15192	7.507	113.483	3.04622e-07	4.23511e-06
XIII	886889	886988	+	-2.70508	7.93727	160.736	4.89453e-08	1.05563e-06
XIII	892321	892410	-	-1.01748	7.47922	18.0591	0.00128312	0.00342495
XIII	895445	895507	-	-2.51146	6.39528	75.2918	2.4532e-06	2.11654e-05
XIII	896639	896759	-	-2.19208	7.36754	18.3073	0.00122093	0.00328053
XIII	897432	897489	-	1.73239	5.39818	8.32887	0.0144259	0.0271029
XIII	898341	898397	+	-1.14456	6.60644	18.6016	0.00115172	0.00311695
XIII	902678	902845	+	1.08211	8.0147	27.1314	0.000264729	0.000911012
XIII	914586	914621	-	-7.72017	5.28595	93.7038	3.63402e-06	2.90392e-05
XIII	914664	914719	-	-8.12319	5.65312	122.44	1.145e-06	1.18544e-05
XIII	915456	915461	+	-6.97414	4.65752	55.999	3.11017e-05	0.000155205
XIII	91581	91613	-	5.1467	7.45139	99.7309	5.92866e-07	7.12318e-06
XIII	92177	92220	+	1.17231	6.19965	12.2983	0.0047094	0.0104069
XIII	9653	9907	-	2.74603	8.76376	215.517	1.01695e-08	3.63858e-07
XIII	97670	97707	+	1.02114	6.34726	8.46187	0.0138385	0.0261203
XIV	122189	122270	-	3.21337	8.17171	168.507	3.80703e-08	8.86365e-07
XIV	13101	13225	+	1.74154	6.10014	12.4309	0.00455345	0.0101174
XIV	137631	137714	-	9.39095	7.12724	108.637	1.92435e-06	1.75354e-05
XIV	145289	145332	-	1.40454	5.89222	9.18738	0.0110925	0.0216732
XIV	157860	157910	-	1.66557	6.57512	40.3872	4.75095e-05	0.000218403
XIV	167765	167865	-	-1.21686	8.90716	33.0453	0.000115244	0.000446836
XIV	175368	175410	+	1.52894	5.91945	18.948	0.00107612	0.00294511
XIV	182623	182679	-	-2.70082	5.73691	31.0187	0.000151171	0.000564542
XIV	182839	182906	+	-1.66597	7.71745	67.3959	4.24052e-06	3.24951e-05
XIV	186903	186938	-	1.34434	6.53311	16.7661	0.00167468	0.00430026
XIV	197758	197910	-	1.23058	6.55138	11.5465	0.00572288	0.0122947
XIV	199989	200032	-	3.26917	5.82713	35.2114	8.74274e-05	0.000357798
XIV	200410	200571	+	1.35819	8.85701	50.3248	1.7251e-05	9.71991e-05
XIV	201526	201629	+	7.68188	5.54659	36.3378	0.000169949	0.000624128
XIV	202146	202183	+	-1.36569	6.16304	16.7484	0.00168095	0.00431407
XIV	205133	205173	+	3.79291	5.2488	27.9187	0.000235245	0.000822933
XIV	214825	214904	+	-1.00242	8.79187	43.3866	3.43138e-05	0.000167306
XIV	217148	217233	-	-1.3402	6.37014	19.0647	0.00105196	0.00288711
XIV	227336	227380	+	3.3061	5.68007	31.8988	0.000134148	0.000509575
XIV	230302	230426	-	1.27312	7.77133	16.4065	0.00180765	0.00458843
XIV	230641	230672	-	1.21948	5.75303	7.30711	0.020084	0.0362092
XIV	234057	234101	-	-5.33045	5.83424	77.6562	2.1029e-06	1.86388e-05
XIV	234302	234419	+	-1.49238	7.73241	58.4303	8.48315e-06	5.64693e-05
XIV	240251	240323	+	-1.03815	8.06269	44.8653	2.94234e-05	0.000147923
XIV	244223	244264	-	-2.68796	5.60011	22.6865	0.000542702	0.00166192
XIV	246939	246991	-	1.81997	5.62135	8.74321	0.012687	0.0243243
XIV	247369	247482	+	2.21056	7.78384	119.684	2.31063e-07	3.4279e-06
XIV	251978	252086	+	-1.60673	8.61348	90.7781	9.57978e-07	1.03131e-05
XIV	254368	254452	+	1.47888	9.26516	82.4754	1.55535e-06	1.46958e-05
XIV	259533	259584	+	8.85202	6.62872	149.936	4.70974e-07	5.99937e-06
XIV	264467	264573	-	2.53025	7.47417	148.484	7.45153e-08	1.46463e-06
XIV	273639	273714	-	2.4176	7.69082	81.2559	1.67618e-06	1.55655e-05
XIV	286188	286273	+	-2.40674	7.59572	15.5753	0.00216576	0.00536316
XIV	289987	290106	+	8.17981	6.0167	76.8555	8.41725e-06	5.62614e-05
XIV	302610	302712	+	-2.54684	8.60633	164.47	4.3318e-08	9.80398e-07
XIV	306950	307172	-	1.55677	7.27579	34.7093	9.30978e-05	0.000375945
XIV	308607	308685	-	-2.49241	7.97543	167.022	3.99086e-08	9.20357e-07
XIV	310484	310548	+	1.66827	6.73071	47.2193	2.3228e-05	0.000123662
XIV	31382	31413	-	1.11899	5.9925	12.2803	0.004731	0.0104404
XIV	31876	31925	+	1.06044	6.16899	7.70438	0.0176152	0.0323331
XIV	323572	323604	-	-1.45161	7.76488	45.356	2.79854e-05	0.000142296
XIV	331285	331364	+	-3.38757	7.52299	222.612	8.53711e-09	3.22028e-07
XIV	340279	340385	+	1.54767	8.34404	85.9956	1.26003e-06	1.25657e-05
XIV	345451	345542	-	-1.40638	5.96957	17.5046	0.00143611	0.00376922
XIV	348529	348598	-	-1.29727	8.31371	44.1014	3.18394e-05	0.000157931
XIV	352337	352390	+	-2.35436	7.18745	110.152	3.55424e-07	4.76444e-06
XIV	359528	359574	+	-8.86005	6.35039	198.286	1.36144e-07	2.28441e-06
XIV	372828	373061	-	8.29128	6.1018	78.2005	7.82537e-06	5.3707e-05
XIV	373590	373652	-	4.79719	8.22848	559.497	5.41456e-11	3.38119e-08
XIV	374680	374768	-	1.45419	7.13627	37.899	6.31738e-05	0.000272039
XIV	375230	375256	+	-2.45727	7.02518	115.348	2.79928e-07	3.9482e-06
XIV	392069	392379	-	1.83545	8.50047	11.4468	0.00587592	0.0125902
XIV	392857	392877	+	-4.76314	5.33256	49.3941	1.88289e-05	0.000104471
XIV	406283	406325	+	10.561	8.21256	616.887	7.84569e-10	9.11594e-08
XIV	412053	412154	-	1.67054	7.92113	70.7529	3.33842e-06	2.74869e-05
XIV	413553	413654	+	-3.36933	8.29457	333.43	9.44676e-10	1.03567e-07
XIV	418491	418587	-	-1.63368	8.20966	58.5397	8.40718e-06	5.62614e-05
XIV	426557	426946	-	1.20681	9.17532	43.4851	3.39597e-05	0.000166327
XIV	427534	427629	+	1.0206	6.68622	12.4248	0.00456049	0.0101238
XIV	441119	441141	+	-2.15096	5.13575	10.9515	0.00671186	0.0141385
XIV	444306	444399	-	-2.70589	9.45292	314.008	1.31271e-09	1.1829e-07
XIV	449778	449870	+	2.4284	6.99888	110.578	3.48402e-07	4.69356e-06
XIV	452244	452283	+	2.42598	6.8623	97.3061	6.72476e-07	7.73586e-06
XIV	462266	462344	+	-7.88484	5.43565	71.6237	1.13053e-05	7.06182e-05
XIV	466850	466895	+	-1.43883	6.63192	10.0701	0.0085764	0.0174322
XIV	48034	48075	-	-1.70243	6.43185	43.1904	3.50323e-05	0.000170297
XIV	485516	485575	+	-1.79913	7.25503	85.7936	1.27508e-06	1.26623e-05
XIV	490253	490357	+	-1.42073	7.91677	71.8537	3.09323e-06	2.58176e-05
XIV	490862	490899	+	3.43865	5.31432	21.278	0.000695558	0.00205375
XIV	494986	495054	-	-1.99769	7.81156	132.736	1.34512e-07	2.27269e-06
XIV	498446	498580	-	-1.12388	6.94397	25.479	0.000342049	0.00112384
XIV	500913	501021	+	-1.26409	8.10469	45.4406	2.7746e-05	0.000141726
XIV	510241	510279	-	-1.76104	6.38419	19.2233	0.00102018	0.00282378
XIV	510438	510542	+	-1.68882	9.20287	124.163	1.90778e-07	2.93907e-06
XIV	515131	515216	+	1.42331	5.6597	7.13306	0.0212946	0.0379697
XIV	517206	517232	+	-1.39409	5.19817	10.2288	0.00819925	0.0167707
XIV	52408	52471	-	-1.07593	6.53265	9.9804	0.00879854	0.0178168
XIV	52594	52653	+	-1.06427	7.23977	22.3018	0.000580131	0.00176102
XIV	526018	526072	+	1.52215	6.76195	31.7896	0.000136133	0.000515505
XIV	542953	543014	+	1.0741	6.14658	7.72767	0.017482	0.0321373
XIV	546633	546664	+	-1.49727	6.31096	23.4656	0.000475277	0.00148822
XIV	54894	54957	-	8.23819	6.05427	77.949	7.9321e-06	5.42433e-05
XIV	553314	553380	+	1.11532	6.81913	15.7049	0.00210474	0.005228
XIV	556989	557061	+	-1.29691	7.0508	23.5694	0.000467059	0.00146626
XIV	558996	559204	-	1.5815	9.10547	118.302	2.45463e-07	3.55483e-06
XIV	559638	559666	+	-3.65031	4.75756	22.3934	0.000570948	0.0017376
XIV	567752	567752	-	-1.04021	6.56397	13.9288	0.00315608	0.00738695
XIV	585587	585609	+	-1.00542	6.64176	18.2893	0.00122532	0.00328978
XIV	592897	592936	-	-1.07665	6.76216	20.6938	0.000773525	0.00224046
XIV	59799	59831	-	1.19642	6.98838	20.6321	0.000782339	0.00225659
XIV	602800	602880	+	-1.33125	6.59956	16.4082	0.00180699	0.00458843
XIV	605211	605516	+	1.73316	10.9418	103.156	4.9851e-07	6.25193e-06
XIV	606237	606267	+	7.37321	5.3435	50.6973	4.64144e-05	0.000213876
XIV	610933	610978	+	3.36219	5.25927	19.0979	0.00104522	0.0028751
XIV	613190	613195	-	-2.37702	5.39716	25.7393	0.000328256	0.00108882
XIV	614776	614823	+	9.25527	6.9922	287.335	2.56633e-08	6.78682e-07
XIV	615827	615871	+	-8.01518	5.54544	94.2369	3.54694e-06	2.86226e-05
XIV	618227	618281	-	1.45797	5.94282	9.90215	0.00899803	0.0181501
XIV	627150	627214	-	-1.21694	9.48961	70.0257	3.51296e-06	2.84427e-05
XIV	62947	62985	-	-2.63529	8.42215	145.812	8.20224e-08	1.55907e-06
XIV	630664	630905	-	2.75292	5.83414	36.4232	7.53384e-05	0.000314675
XIV	631008	631303	-	1.00642	9.46738	58.926	8.14531e-06	5.51253e-05
XIV	633854	633967	-	5.44323	7.53445	141.517	9.60361e-08	1.77685e-06
XIV	635301	635360	-	-1.20643	7.32248	15.9773	0.00198301	0.00497644
XIV	636687	636779	-	-1.81642	5.66362	20.3947	0.000817419	0.00234388
XIV	640132	640235	-	1.33343	7.00604	32.985	0.000116157	0.000450017
XIV	64571	64645	-	-2.30729	8.1182	162.991	4.54503e-08	9.96221e-07
XIV	651715	651759	-	-1.16768	6.40926	15.4357	0.00223381	0.00551203
XIV	652411	652474	+	-6.04341	7.15809	129.621	1.52346e-07	2.47105e-06
XIV	653353	653387	+	-2.21102	6.32468	24.009	0.000434067	0.0013769
XIV	65614	65662	+	-3.7859	7.95664	187.09	2.17643e-08	6.12169e-07
XIV	661625	661667	-	-2.29121	5.40429	28.7125	0.000209355	0.000748508
XIV	661805	661988	-	-1.08114	9.3464	64.199	5.37786e-06	3.94107e-05
XIV	662298	662337	+	-1.32403	5.56391	9.90215	0.00899803	0.0181501
XIV	664202	664297	+	-1.31849	7.98914	67.8639	4.09894e-06	3.19127e-05
XIV	668315	668353	+	-1.04878	6.81692	20.5412	0.000795557	0.00228616
XIV	674881	674919	+	-2.00614	5.29382	16.9316	0.00161739	0.00417961
XIV	685866	685939	+	1.02678	5.6236	6.4724	0.0267598	0.0461913
XIV	692355	692412	+	1.99337	6.79665	39.7174	5.12257e-05	0.000232522
XIV	692454	692517	+	2.33171	8.85548	239.642	5.72759e-09	2.40263e-07
XIV	694781	694879	-	1.12772	7.20744	27.9792	0.000233144	0.000817349
XIV	701833	701889	+	-1.39983	6.88413	30.0122	0.000173851	0.000636536
XIV	703658	703658	+	-7.96348	5.50613	96.115	3.25969e-06	2.69968e-05
XIV	707731	707799	+	-1.31523	7.61902	47.3406	2.29527e-05	0.000122599
XIV	715427	715484	-	-2.24788	6.07686	32.4391	0.000124818	0.000478995
XIV	716115	716117	+	-3.49938	5.08323	31.8876	0.000134352	0.00050995
XIV	720686	720782	-	-1.20707	7.67447	31.7466	0.000136924	0.000518095
XIV	723136	723166	-	-3.55396	6.43354	72.437	2.97194e-06	2.49336e-05
XIV	724285	724366	-	-2.05376	9.45731	264.12	3.37657e-09	1.76789e-07
XIV	762809	762872	-	-1.4968	6.00915	16.6888	0.00170228	0.00436191
XIV	779892	779918	+	-2.15874	5.76993	11.8413	0.00529735	0.0115099
XIV	80560	80684	+	1.04261	7.52857	14.0585	0.00306089	0.00720836
XIV	80754	80820	+	7.45	5.39858	68.3269	1.37528e-05	8.15118e-05
XV	1003938	1003959	+	-4.00853	4.73398	27.573	0.000247688	0.000859052
XV	1015043	1015056	-	-2.67973	5.95613	49.4655	1.8702e-05	0.000104004
XV	1017548	1017580	-	-1.16182	6.72706	24.521	0.00039904	0.00128167
XV	1023192	1023295	-	1.41149	6.6136	20.0438	0.000872713	0.00247761
XV	1028635	1028744	-	-2.88945	7.92883	145.394	8.32748e-08	1.57671e-06
XV	1031250	1031286	-	-2.01402	5.18341	9.68831	0.00957118	0.019166
XV	1031318	1031366	-	-1.12149	5.64839	6.63935	0.0252342	0.0438064
XV	1034237	1034318	-	1.30422	6.95711	23.6545	0.000460444	0.00144736
XV	1039765	1039898	+	2.55284	9.87784	322.539	1.1334e-09	1.07712e-07
XV	1040473	1040607	+	7.11059	5.09972	46.6469	6.46203e-05	0.000276311
XV	1043089	1043118	-	-2.45925	6.63081	73.0394	2.85248e-06	2.40558e-05
XV	1046151	1046299	+	-10.1518	7.64616	259.945	4.03564e-08	9.26294e-07
XV	1060827	1061160	-	1.74328	10.4173	86.9371	1.19258e-06	1.22171e-05
XV	1061449	1061555	+	2.40969	5.71189	29.9745	0.000174776	0.000639443
XV	1064991	1065073	+	-1.48269	7.03087	48.6424	2.02284e-05	0.000111096
XV	117941	117999	+	1.93885	7.16138	84.0908	1.41072e-06	1.35395e-05
XV	122246	122285	+	7.16358	5.11832	32.1212	0.000269745	0.00092631
XV	127900	127983	-	-2.13019	6.82278	50.2036	1.74474e-05	9.81491e-05
XV	137826	137853	-	-1.86166	7.32139	77.9197	2.06763e-06	1.84607e-05
XV	144160	144184	+	-1.26041	6.01733	19.1053	0.00104372	0.00287421
XV	153524	153564	-	1.11032	6.08493	6.85861	0.0233855	0.0409773
XV	159105	159163	+	4.15793	5.895	38.5975	5.82317e-05	0.000256663
XV	160588	160644	-	-2.483	8.96775	289.055	2.06463e-09	1.4133e-07
XV	161457	161494	+	-7.50684	5.09734	77.0058	8.34848e-06	5.61364e-05
XV	161595	161691	-	3.13034	8.19364	282.929	2.32077e-09	1.50123e-07
XV	162230	162321	+	4.30329	6.87354	99.5402	5.98709e-07	7.15216e-06
XV	165585	165648	+	2.58656	5.93814	19.5754	0.000953549	0.00267742
XV	168634	168760	+	1.25672	9.24864	55.4796	1.08728e-05	6.82672e-05
XV	185388	185444	+	1.58176	8.31056	105.589	4.42167e-07	5.7529e-06
XV	186731	186804	-	-2.44569	6.91281	99.1812	6.09896e-07	7.22081e-06
XV	186999	187002	+	-1.26259	5.03834	6.48133	0.0266755	0.0460621
XV	193194	193257	-	1.64242	5.98878	23.9627	0.000437411	0.0013857
XV	212181	212252	+	-1.06959	6.14632	11.9246	0.00518397	0.0113016
XV	215674	215677	+	6.73784	4.81256	43.1119	8.80536e-05	0.000360058
XV	219131	219152	+	-2.66728	6.66119	55.4968	1.08568e-05	6.82545e-05
XV	223174	223239	+	-3.52436	6.23869	35.3595	8.5833e-05	0.000352068
XV	226110	226157	-	6.95006	4.97467	45.9032	6.88501e-05	0.000291579
XV	231662	231843	-	2.22678	9.6679	270.62	2.95784e-09	1.72211e-07
XV	23237	23292	-	3.14951	5.73204	29.4221	0.000189012	0.000684324
XV	233646	233658	-	-7.03245	4.71228	52.551	4.01925e-05	0.00019025
XV	241093	241113	-	4.46611	5.81124	41.5931	4.15895e-05	0.000194778
XV	241567	241607	+	-1.57887	5.66612	7.1108	0.0214556	0.0382289
XV	243375	243415	+	7.62005	5.54378	73.1514	1.03521e-05	6.58472e-05
XV	247082	247111	+	2.19127	5.83346	13.9019	0.00317623	0.00742341
XV	252670	252723	-	-1.52891	7.34141	49.5332	1.85826e-05	0.000103577
XV	253415	253694	-	-2.3156	10.588	266.908	3.18898e-09	1.76336e-07
XV	254129	254323	+	-1.55441	10.2605	77.6704	2.10098e-06	1.86388e-05
XV	255080	255199	-	1.28878	7.58017	32.8025	0.000118972	0.000459786
XV	255259	255311	-	7.47183	5.40698	71.5055	1.13834e-05	7.1015e-05
XV	255283	255334	+	1.46693	7.1646	21.4406	0.00067553	0.0020019
XV	255592	255745	+	3.63114	6.40682	32.3219	0.000126776	0.000485742
XV	267503	267604	-	2.16467	6.49583	52.045	1.47257e-05	8.63833e-05
XV	267938	267983	-	-3.93927	5.44047	53.4757	1.29521e-05	7.81944e-05
XV	27354	27418	-	4.50247	6.65012	36.5177	7.44805e-05	0.000311627
XV	299491	299554	+	-9.31071	6.80148	299.151	2.13828e-08	6.04933e-07
XV	303168	303196	-	1.19319	5.75333	9.51052	0.0100809	0.0200383
XV	303409	303460	+	-1.2624	5.24379	9.37833	0.0104809	0.0207233
XV	304587	304625	+	1.74166	6.92361	48.0757	2.13646e-05	0.000115383
XV	305299	305328	+	-2.78862	4.78512	15.8594	0.00203464	0.00507982
XV	310115	310194	-	1.40317	6.97154	22.1974	0.000590806	0.00179065
XV	312436	312452	-	-3.91471	4.96217	25.0196	0.000368087	0.00119567
XV	31646	31692	-	1.49231	7.78852	21.049	0.000724954	0.0021238
XV	333527	333561	+	-3.59378	5.19542	34.0151	0.000101667	0.000403516
XV	338636	338688	-	-1.16696	5.85031	11.4314	0.00589994	0.0126305
XV	369492	369674	+	-1.72522	6.83531	28.4656	0.000217031	0.000771983
XV	371598	371696	+	3.03404	7.75051	210.882	1.14348e-08	3.97443e-07
XV	384624	384682	-	1.13437	5.41305	7.5139	0.0187507	0.0341599
XV	389180	389215	+	3.96557	5.41568	29.0812	0.000198478	0.000713817
XV	400080	400161	-	1.16469	7.60466	28.6722	0.000210586	0.000752356
XV	406995	407096	+	2.80882	6.85317	55.8061	1.05726e-05	6.664e-05
XV	412761	412767	+	-1.3923	5.83083	13.5193	0.00348031	0.00803378
XV	415920	415956	-	-1.33204	7.53176	20.8871	0.000746638	0.00217423
XV	417776	417842	-	-3.10565	7.74571	295.838	1.81889e-09	1.38292e-07
XV	422386	422426	+	1.56464	5.45874	6.54249	0.0261063	0.0451754
XV	423917	423933	-	-6.75783	4.49671	47.4687	6.03075e-05	0.000264137
XV	426092	426174	-	-2.61877	7.08271	94.4999	7.80842e-07	8.775e-06
XV	429855	430018	-	2.09145	8.08308	31.4396	0.00014273	0.000537367
XV	431675	431751	-	-1.73266	6.87376	48.7399	2.00401e-05	0.000110311
XV	435571	435616	-	7.68349	5.58418	82.1392	6.36113e-06	4.55195e-05
XV	43646	43690	+	3.74661	7.20247	69.8114	3.56642e-06	2.87238e-05
XV	437605	437670	-	2.1664	5.61126	12.7538	0.00419864	0.00942806
XV	444598	444717	+	-2.46773	9.33442	200.213	1.51238e-08	4.77486e-07
XV	446712	446820	-	1.06446	7.76873	22.7142	0.000540119	0.00165818
XV	449317	449339	+	-1.63878	5.5063	17.2304	0.00151969	0.00395733
XV	461712	461745	-	-1.48506	4.74856	8.74129	0.0126945	0.0243291
XV	468180	468207	+	1.23214	6.24791	8.99329	0.0117581	0.0227476
XV	471627	471661	-	1.32085	6.51794	20.2196	0.000844475	0.00240868
XV	472642	472752	+	-2.04727	8.74192	78.6934	1.96803e-06	1.77671e-05
XV	474588	474770	+	1.10051	6.49351	11.5039	0.00578771	0.0124121
XV	48636	48695	-	2.76729	6.09185	56.1162	1.02964e-05	6.56648e-05
XV	502471	502499	-	-1.15894	6.63953	14.4112	0.00281877	0.0067269
XV	505695	505787	+	-3.41376	8.30067	299.043	1.71482e-09	1.35376e-07
XV	507509	507639	-	1.07019	7.14638	18.77	0.0011142	0.00303885
XV	514287	514349	-	8.62625	6.42263	168.333	2.82273e-07	3.96977e-06
XV	515143	515182	+	-1.55324	5.8339	20.1848	0.00084997	0.00242152
XV	521062	521088	+	-3.95137	4.67831	26.5867	0.000287692	0.000977955
XV	522616	522634	-	-7.21317	4.85284	67.5741	1.43993e-05	8.47241e-05
XV	522986	523019	+	-7.04877	4.71646	53.0779	3.86123e-05	0.000184203
XV	53037	53097	+	-1.48859	7.74938	61.9221	6.40979e-06	4.56662e-05
XV	544341	544359	-	-1.25395	6.1322	14.5459	0.00273234	0.00653988
XV	550487	550497	+	-2.5282	5.12148	24.8207	0.000380084	0.0012289
XV	551007	551108	+	3.46169	7.62305	184.282	2.36018e-08	6.3451e-07
XV	55129	55194	-	-1.01694	8.34213	47.5154	2.2563e-05	0.000120783
XV	566204	566275	-	-1.11331	7.94043	49.7388	1.82255e-05	0.00010182
XV	570812	570905	-	-2.71328	5.58926	23.8146	0.000448302	0.00141376
XV	574996	575068	+	-1.49022	7.22611	37.1283	6.92115e-05	0.000292855
XV	578433	578474	+	2.66075	7.00458	67.4262	4.23119e-06	3.24747e-05
XV	580120	580223	+	1.22017	8.43799	39.4537	5.27818e-05	0.000237592
XV	586636	586687	+	1.13928	7.66689	28.4699	0.000216894	0.000771983
XV	592829	592895	+	1.48047	7.99465	69.1424	3.73962e-06	2.96368e-05
XV	598519	598568	+	3.0464	5.91295	17.945	0.00131296	0.00348871
XV	606187	606249	-	-1.05717	8.13563	56.2375	1.01906e-05	6.50757e-05
XV	606568	606582	+	2.87584	5.66585	26.1574	0.000307456	0.00103249
XV	61051	61118	-	-1.07034	7.68402	32.2731	0.000127601	0.000487749
XV	619632	619691	+	-2.16648	8.42028	193.391	1.8221e-08	5.40629e-07
XV	624653	624719	+	-1.1359	7.48671	29.1791	0.000195706	0.000705745
XV	627964	628012	-	1.24262	6.16633	13.7145	0.00332108	0.00771746
XV	631755	631850	-	1.09857	8.52076	55.6098	1.07518e-05	6.76824e-05
XV	649011	649076	-	-1.39351	7.45039	52.7681	1.37958e-05	8.16668e-05
XV	657167	657261	+	1.85045	7.79165	82.7111	1.5332e-06	1.45147e-05
XV	661719	661769	-	-1.84449	5.77809	24.2548	0.000416813	0.0013291
XV	662218	662239	+	-3.96882	4.70511	26.3309	0.000299283	0.00101063
XV	662911	662934	+	3.60292	5.10627	21.7315	0.000641362	0.00191464
XV	670489	670600	-	1.22332	8.34053	60.851	6.97495e-06	4.86946e-05
XV	672399	672450	-	-1.66511	6.58064	42.9056	3.61068e-05	0.000173911
XV	675420	675512	+	3.17267	6.29646	68.329	3.96373e-06	3.11591e-05
XV	675653	675676	-	-1.44787	5.70234	17.5972	0.00140914	0.00370842
XV	678788	678840	-	-1.11665	7.80082	41.6251	4.14446e-05	0.000194388
XV	679243	679273	+	1.14945	5.54178	9.22683	0.0109627	0.0215122
XV	679298	679321	+	-7.73421	5.30299	95.2491	3.38847e-06	2.77581e-05
XV	682127	682184	-	2.89616	7.30128	120.339	2.2459e-07	3.35232e-06
XV	68967	69024	-	-7.29802	4.92764	61.316	2.14911e-05	0.000115938
XV	721919	721951	+	-2.99722	7.06881	163.076	4.53247e-08	9.96221e-07
XV	722876	722901	+	-1.52876	6.62559	35.3551	8.58803e-05	0.000352068
XV	727439	727489	+	-1.38432	8.07838	43.5737	3.3645e-05	0.00016537
XV	733451	733518	-	-1.45873	6.2496	19.7257	0.000926681	0.002608
XV	733695	733783	+	1.17666	6.37508	15.7259	0.00209507	0.00520665
XV	733939	734028	+	1.96348	5.67921	17.8617	0.00133527	0.00354084
XV	738251	738326	+	-1.32341	7.60378	54.5997	1.17333e-05	7.22715e-05
XV	73886	73937	-	-1.58374	5.98456	17.8445	0.00133994	0.00355128
XV	742622	742703	+	2.22188	7.08077	93.1212	8.41554e-07	9.28572e-06
XV	742735	742840	+	-2.40546	7.73223	134.281	1.26584e-07	2.17653e-06
XV	747194	747347	-	1.64291	10.2679	141.223	9.70946e-08	1.78963e-06
XV	757853	757890	+	-1.58339	5.27241	12.4184	0.00456793	0.0101265
XV	758271	758311	+	-3.48951	6.83047	148.435	7.46459e-08	1.46463e-06
XV	759498	759529	-	-1.72143	5.6561	11.9511	0.00514857	0.0112395
XV	761266	761301	-	-1.03407	6.75456	18.7598	0.00111643	0.00304004
XV	767980	768049	-	2.91266	5.85809	15.6078	0.00215025	0.00533289
XV	772413	772558	+	-1.23535	7.93753	22.6373	0.000547324	0.00167397
XV	779414	779437	-	-3.9098	6.71058	198.532	1.58252e-08	4.9048e-07
XV	780278	780421	+	2.44163	7.66508	71.2913	3.21575e-06	2.67484e-05
XV	783659	783679	+	-1.34148	5.42188	11.588	0.00566063	0.0121933
XV	787098	787177	+	-1.10336	6.30617	16.4301	0.00179853	0.00457243
XV	792255	792299	-	-1.12795	6.61407	14.6593	0.00266201	0.00639672
XV	795520	795590	-	1.33009	6.93507	15.1322	0.00239075	0.00583419
XV	797414	797476	+	-2.38117	9.15562	171.446	3.47171e-08	8.24065e-07
XV	80308	80340	+	-2.13108	8.91521	173.449	3.26306e-08	7.89952e-07
XV	804336	804370	+	-1.70047	6.15374	34.3104	9.79127e-05	0.000392102
XV	813924	813972	+	-1.25564	6.26464	17.9581	0.00130951	0.00348202
XV	816985	817062	-	1.05761	8.43604	52.8782	1.36603e-05	8.11612e-05
XV	817219	817291	+	1.60158	6.2303	24.7869	0.000382166	0.00123481
XV	81820	82109	-	4.54924	7.23205	28.3077	0.000222111	0.000785461
XV	82968	83007	-	1.00793	8.20175	25.5244	0.000339594	0.00111729
XV	832323	832348	+	-1.04832	6.19738	8.9893	0.0117723	0.0227588
XV	832723	832800	+	-4.37124	6.7257	103.943	4.79401e-07	6.09029e-06
XV	83474	83520	+	-3.56039	5.12562	22.1377	0.000597017	0.00180041
XV	836502	836548	-	-2.46438	6.25081	68.2996	3.9721e-06	3.11746e-05
XV	837031	837065	-	9.02918	6.78734	233.673	6.5212e-08	1.31125e-06
XV	83773	83806	+	-2.28658	5.80418	24.9821	0.000370316	0.00120131
XV	849606	849734	+	1.279	8.94671	66.504	4.52662e-06	3.42027e-05
XV	851858	851887	-	-2.31509	5.90526	28.947	0.00020236	0.000725631
XV	853097	853158	-	1.24607	5.82705	11.7217	0.00546533	0.0118249
XV	853348	853411	+	1.97833	7.66182	88.0987	1.11514e-06	1.16194e-05
XV	867027	867103	+	-1.99224	9.66101	201.949	1.44374e-08	4.59166e-07
XV	86774	86803	-	-3.27495	6.25126	36.8587	7.1482e-05	0.000300632
XV	868291	868311	+	-1.18572	6.27958	15.842	0.0020424	0.00509658
XV	878354	878422	+	-1.33174	6.07273	10.2963	0.00804482	0.0164965
XV	880931	881017	+	-2.7652	7.80778	118.335	2.45107e-07	3.55483e-06
XV	898384	898399	-	-4.0772	4.78821	27.1947	0.000262203	0.00090424
XV	901177	901264	-	-2.48792	9.19722	247.9	4.76572e-09	2.20857e-07
XV	904673	904716	+	-7.01015	4.68685	57.0407	2.88611e-05	0.000145687
XV	907674	907717	-	1.76939	6.14417	26.2136	0.000304777	0.00102633
XV	91455	91459	-	1.74008	4.97114	7.00129	0.0222693	0.0393187
XV	922914	922940	-	-1.06214	7.44344	38.6855	5.76423e-05	0.000254574
XV	925017	925056	-	7.06574	5.07295	49.3443	5.17047e-05	0.000233425
XV	925114	925219	-	1.10697	7.91427	42.7177	3.68373e-05	0.000176601
XV	92859	92944	-	-2.82738	8.77829	350.31	7.20294e-10	8.76238e-08
XV	931085	931173	-	1.48856	8.12086	61.616	6.56559e-06	4.65717e-05
XV	94396	94444	-	-2.93687	8.38561	292.025	1.95251e-09	1.39431e-07
XV	949182	949256	-	-1.33601	6.39127	20.0076	0.000878659	0.00249304
XV	960862	960880	+	-2.50435	6.59929	69.9462	3.53269e-06	2.85549e-05
XV	96366	96466	-	2.08082	6.77695	59.0263	8.07885e-06	5.49584e-05
XV	967708	967757	-	-2.43994	6.30857	37.8666	6.34149e-05	0.000272356
XV	986732	986747	-	8.78108	6.55301	170.42	2.67255e-07	3.78041e-06
XVI	106978	106993	+	2.17064	5.63459	13.0252	0.00392552	0.00890932
XVI	115577	115674	+	3.57357	5.05687	17.9838	0.00130274	0.00346968
XVI	121283	121339	-	-1.44344	7.27237	48.3815	2.07424e-05	0.000112774
XVI	121694	121759	+	-1.60283	7.24721	45.4021	2.78546e-05	0.000142076
XVI	128052	128209	-	1.9865	7.09244	58.9972	8.09806e-06	5.49584e-05
XVI	129156	129210	-	7.47547	8.55106	321.631	1.15105e-09	1.07712e-07
XVI	130010	130130	+	5.1651	7.27796	147.442	7.73439e-08	1.49942e-06
XVI	135747	135782	+	-1.72581	6.19452	36.1971	7.7436e-05	0.000322055
XVI	147378	147408	+	1.13438	5.40298	7.93028	0.0163729	0.0303506
XVI	151853	151928	-	6.64027	7.76396	199.994	1.52133e-08	4.77486e-07
XVI	153453	153469	+	-2.603	5.7751	41.1673	4.35748e-05	0.000202324
XVI	171164	171206	-	10.1998	7.87313	388.993	6.48082e-09	2.65005e-07
XVI	171417	171489	+	7.42889	5.39076	55.5353	3.21667e-05	0.00015923
XVI	172753	172813	-	-1.68139	7.63273	93.7869	8.11572e-07	9.05759e-06
XVI	174966	175039	+	2.40298	5.69502	35.9824	7.94925e-05	0.0003292
XVI	175303	175377	+	8.01774	5.86623	71.07	1.16769e-05	7.22017e-05
XVI	184708	184756	-	1.31173	5.64022	11.1586	0.00634626	0.0134561
XVI	195339	195590	-	2.33389	10.4702	216.743	9.86266e-09	3.56708e-07
XVI	198989	199048	+	1.05529	7.15902	15.2691	0.00231841	0.00568618
XVI	202525	202583	-	-1.60429	5.86491	13.1219	0.00383336	0.00872865
XVI	227350	227428	-	10.5777	8.22748	584.375	1.00613e-09	1.04167e-07
XVI	228521	228629	+	1.02078	9.20409	36.7627	7.23114e-05	0.000303596
XVI	242706	242769	-	-2.71063	8.87606	130.468	1.47236e-07	2.40419e-06
XVI	246871	246978	+	-1.92848	8.57541	105.31	4.48228e-07	5.79216e-06
XVI	24950	25079	+	-1.90047	7.03316	65.0109	5.05811e-06	3.76918e-05
XVI	256738	256852	-	1.9699	8.70072	118.17	2.46885e-07	3.56481e-06
XVI	273195	273263	+	3.85394	8.70917	324.764	1.09148e-09	1.07712e-07
XVI	277546	277615	-	-1.6123	6.93778	47.9932	2.15363e-05	0.000116053
XVI	279933	280030	-	-1.22892	7.19497	38.539	5.86281e-05	0.000258093
XVI	281514	281517	-	-3.98579	4.74149	24.6869	0.000388414	0.00125084
XVI	282058	282112	+	-2.44275	7.71527	126.503	1.73046e-07	2.75725e-06
XVI	292404	292506	-	1.08239	7.04444	9.90181	0.00899891	0.0181501
XVI	299506	299534	-	2.08367	6.43783	54.6523	1.16797e-05	7.22017e-05
XVI	30033	30103	+	1.04313	7.73084	22.129	0.000597929	0.00180078
XVI	301492	301648	+	1.69045	7.23231	36.9226	7.09357e-05	0.000298859
XVI	303051	303117	+	-2.80979	9.12915	353.732	6.82821e-10	8.70865e-08
XVI	303459	303499	+	-6.83537	4.55989	44.6085	7.70478e-05	0.000321263
XVI	303532	303644	+	-5.70455	6.21423	81.9065	1.6104e-06	1.50987e-05
XVI	310153	310200	+	-2.71737	6.78027	74.465	2.59163e-06	2.2047e-05
XVI	326287	326349	-	2.29563	7.27845	90.0157	9.99878e-07	1.06464e-05
XVI	328776	328847	-	-1.03967	7.8996	48.3913	2.07228e-05	0.000112774
XVI	337141	337175	-	7.68137	5.6045	61.6821	2.09731e-05	0.000113647
XVI	344877	344985	-	2.01083	6.07666	39.6284	5.17445e-05	0.000233425
XVI	35081	35261	+	1.11444	8.07192	48.9098	1.97169e-05	0.000108655
XVI	370894	370942	+	-4.07589	6.5532	70.1563	3.48084e-06	2.82767e-05
XVI	373629	373684	+	3.12588	6.74883	42.4688	3.78314e-05	0.000180833
XVI	378398	378483	-	-2.29255	9.71442	267.365	3.15939e-09	1.76336e-07
XVI	381606	381671	+	-2.32073	5.49292	24.7826	0.000382432	0.00123485
XVI	383292	383464	+	1.59728	7.63535	48.4917	2.05234e-05	0.00011221
XVI	386453	386514	-	-1.72413	6.24689	24.2664	0.000416019	0.00132744
XVI	39025	39098	+	-1.93831	6.63225	47.9584	2.16093e-05	0.000116317
XVI	404907	404926	+	-2.22363	7.72779	80.1418	1.79633e-06	1.65548e-05
XVI	406589	406628	+	-2.67883	8.43241	104.838	4.58722e-07	5.87405e-06
XVI	408738	408827	-	1.23398	8.10989	48.4722	2.05619e-05	0.000112294
XVI	40915	40971	+	2.688	9.63884	361.373	6.07126e-10	8.66094e-08
XVI	42301	42676	+	6.72684	8.7268	260.719	3.62338e-09	1.8366e-07
XVI	425114	425167	-	-2.02111	5.62552	22.4723	0.000563174	0.00171705
XVI	426023	426075	+	-1.58382	5.61771	19.0198	0.00106117	0.00290911
XVI	453403	453422	+	-1.04163	7.19925	30.5559	0.000161136	0.000597172
XVI	454637	454837	-	4.94276	6.22464	64.419	5.28895e-06	3.8935e-05
XVI	455599	455823	+	2.35848	8.29155	84.7529	1.35605e-06	1.32287e-05
XVI	458723	458778	+	1.32403	5.59322	9.64326	0.00969737	0.0193868
XVI	464444	464464	+	-3.30276	4.96798	27.1974	0.000262097	0.00090424
XVI	46507	46580	-	-3.02397	6.41216	61.0365	6.87297e-06	4.82466e-05
XVI	47139	47887	+	1.87262	9.79078	136.625	1.15579e-07	2.04282e-06
XVI	503206	503256	+	-1.19863	5.71538	9.54696	0.00997388	0.019858
XVI	506397	506449	-	1.20465	6.21282	16.7747	0.00167163	0.00429469
XVI	514262	514323	-	1.72224	6.5462	33.3372	0.000110945	0.000433272
XVI	520160	520224	-	1.0535	5.94937	9.12004	0.0113182	0.0220386
XVI	527513	527542	+	-3.70914	7.70674	248.744	4.67862e-09	2.20857e-07
XVI	527614	527615	+	-6.71559	4.46366	47.1875	6.17424e-05	0.00026777
XVI	528330	528430	+	7.30016	5.26087	50.4121	4.74728e-05	0.000218403
XVI	529565	529691	+	-2.67949	6.51672	50.3201	1.72585e-05	9.71991e-05
XVI	544541	544610	+	2.22177	6.57979	39.285	5.38064e-05	0.000241336
XVI	545486	545491	+	-6.95535	4.65275	50.1629	4.84217e-05	0.000221864
XVI	545542	545579	+	-2.72629	5.29333	15.3365	0.00228376	0.0056182
XVI	551499	551619	-	4.25656	5.60696	31.1957	0.000147551	0.000552721
XVI	556299	556397	+	9.66663	7.37575	283.817	2.71343e-08	6.97907e-07
XVI	558365	558383	+	6.74055	7.86244	182.287	2.50176e-08	6.65221e-07
XVI	565340	565378	+	-2.0102	6.38478	39.1972	5.43488e-05	0.000243294
XVI	566688	566797	-	7.37925	5.32784	64.205	1.77872e-05	9.97148e-05
XVI	569000	569124	-	9.15467	6.9067	177.585	2.22566e-07	3.33232e-06
XVI	572824	572848	+	2.58532	6.98602	78.0131	2.0553e-06	1.83844e-05
XVI	581208	581262	-	-2.58103	6.28024	51.3174	1.57367e-05	9.09849e-05
XVI	582726	582825	-	3.21661	7.74798	244.537	5.1326e-09	2.29131e-07
XVI	593117	593199	-	-1.09015	7.50342	15.941	0.00199875	0.00500048
XVI	609991	610095	-	1.44318	7.87086	54.2449	1.21028e-05	7.39853e-05
XVI	615346	615390	+	8.48282	6.30856	86.5609	5.09431e-06	3.77305e-05
XVI	622991	622999	+	-1.64556	5.69636	16.5092	0.00176843	0.00450532
XVI	634057	634120	+	1.91794	6.658	8.13326	0.0153448	0.0286728
XVI	638989	639020	-	-1.60137	5.56443	15.8307	0.00204749	0.00510379
XVI	644963	644966	-	-1.25357	5.57044	9.93441	0.00891515	0.0180155
XVI	648597	648621	+	-1.16272	7.14607	29.4848	0.00018733	0.00067874
XVI	654085	654157	+	-2.00654	9.53992	203.919	1.37025e-08	4.47539e-07
XVI	664904	664950	+	-1.11701	7.43674	20.9564	0.000737265	0.00215209
XVI	66783	66805	-	-2.55642	5.65304	45.0535	2.88619e-05	0.000145687
XVI	675641	675706	-	-3.74321	6.2635	52.0384	1.47345e-05	8.63833e-05
XVI	677108	677222	+	-1.42955	9.71178	84.7464	1.35658e-06	1.32287e-05
XVI	679504	679711	+	1.05105	10.1683	31.6268	0.000139156	0.000526133
XVI	688145	688160	+	-1.36976	5.24138	11.3253	0.00606904	0.0129526
XVI	694893	694951	-	-1.18097	7.5078	37.9549	6.27609e-05	0.00027074
XVI	696852	696882	-	1.01126	6.23341	7.3721	0.0196531	0.0355907
XVI	697486	697647	+	8.60396	6.39652	118.533	1.31861e-06	1.30414e-05
XVI	700545	700585	+	-1.33246	9.6065	98.073	6.46008e-07	7.44899e-06
XVI	709915	709952	-	1.07264	5.36871	6.56505	0.0259	0.0448344
XVI	710268	710328	+	8.53693	6.31989	83.1104	6.05274e-06	4.36336e-05
XVI	719370	719388	-	-2.18583	4.63277	11.2026	0.00627165	0.0133091
XVI	729508	729572	-	1.2329	7.27492	34.4911	9.56956e-05	0.000384322
XVI	731413	731898	-	-2.60539	12.1863	140.972	9.80103e-08	1.79969e-06
XVI	73882	73960	-	-1.64123	7.57484	69.3457	3.68596e-06	2.93098e-05
XVI	739685	739686	-	-3.07462	4.57977	15.1497	0.00238134	0.00581889
XVI	742325	742423	+	1.00323	8.63618	32.0834	0.000130871	0.000498294
XVI	744592	744632	+	2.72073	5.21172	16.6033	0.00173341	0.00443469
XVI	746830	746874	-	-2.7024	8.29919	248.079	4.7471e-09	2.20857e-07
XVI	751926	751994	-	-2.18035	8.10457	151.642	6.66624e-08	1.33489e-06
XVI	752210	752249	+	-4.97186	6.12934	58.1747	8.66384e-06	5.72802e-05
XVI	76180	76300	-	-2.1249	10.2895	270.369	2.97281e-09	1.72211e-07
XVI	76338	76375	-	-1.76286	5.99696	26.2064	0.000305119	0.00102677
XVI	771258	771340	+	-4.52407	5.13334	41.6705	4.12401e-05	0.000193701
XVI	786023	786047	+	2.27029	7.08567	43.1738	3.50939e-05	0.000170426
XVI	789890	789918	+	-1.95708	5.22814	17.9998	0.00129854	0.00346229
XVI	790016	790167	+	1.15759	8.4398	38.2259	6.0802e-05	0.000265497
XVI	794910	794967	+	-2.07318	8.39724	193.144	1.83465e-08	5.41054e-07
XVI	801386	801455	+	7.79649	5.68553	91.6999	3.98548e-06	3.12292e-05
XVI	810283	810325	-	1.31003	5.88346	10.4752	0.00765189	0.0158107
XVI	818271	818323	+	-1.01208	9.02256	46.7685	2.42855e-05	0.00012733
XVI	821433	821492	-	-2.32665	5.85901	23.9734	0.000436633	0.00138414
XVI	822491	822688	+	-2.36254	8.61064	189.508	2.03163e-08	5.87077e-07
XVI	82316	82406	-	1.83145	7.78167	55.8367	1.05449e-05	6.65517e-05
XVI	824786	825086	-	1.03439	9.64806	25.3219	0.000350703	0.00114689
XVI	830057	830178	+	2.90268	6.06836	21.1266	0.000714836	0.00210153
XVI	831648	831809	-	10.9227	8.55623	734.082	3.52444e-10	6.85997e-08
XVI	839725	839758	+	7.38145	5.33745	48.3244	5.61824e-05	0.000250122
[truncated: 17 more rows]

## Sheet: Promoter-proximal diff. TSRs
seqnames	start	end	width	strand	log2FC	logCPM	F	PValue	FDR	annotation	geneChr	geneStart	geneEnd	geneLength	geneStrand	geneId	transcriptId	distanceToTSS
I	101151	101196	46	-	-1.65216	9.55459	132.606	1.35203e-07	2.27646e-06	Promoter	1	100225	101145	921	2	YAL025C	YAL025C_mRNA	-51
I	114803	114818	16	+	-1.06631	5.57722	7.87806	0.0166505	0.0307949	Promoter	1	114919	118314	3396	1	YAL019W	YAL019W_mRNA	-101
I	124782	124818	37	+	1.03272	7.90692	37.8292	6.36949e-05	0.000273315	Promoter	1	124879	126786	1908	1	YAL016W	YAL016W_mRNA	-61
I	130686	130779	94	+	-2.20261	8.65417	207.174	1.25824e-08	4.29795e-07	Promoter	1	130799	131983	1185	1	YAL012W	YAL012W_mRNA	-20
I	136815	136905	91	+	2.20349	7.79525	51.2996	1.57625e-05	9.09849e-05	Promoter	1	136914	137510	597	1	YAL008W	YAL008W_mRNA	-9
I	140597	141029	433	-	3.16101	8.92087	110.531	3.49171e-07	4.69356e-06	Promoter	1	140760	141407	648	1	YAL004W	YAL004W_mRNA	0
I	141182	141675	494	-	1.39649	11.2395	54.7711	1.15596e-05	7.16545e-05	Promoter	1	139503	141431	1929	2	YAL005C	YAL005C_mRNA	0
I	142117	142246	130	+	-1.70883	10.0702	104.344	4.69997e-07	5.99937e-06	Promoter	1	142174	143160	987	1	YAL003W	YAL003W_mRNA	0
I	158847	158897	51	+	-1.35981	6.74504	23.8523	0.000445499	0.00140675	Promoter	1	158966	159793	828	1	YAR008W	YAR008W_mRNA	-69
I	165849	165919	71	-	1.16932	6.54796	13.9904	0.00311042	0.00730469	Promoter	1	164544	165866	1323	2	YAR010C	YAR010C	0
I	190145	190217	73	+	2.78887	6.94123	130.917	1.44605e-07	2.36919e-06	Promoter	1	190193	192256	2064	1	YAR035W	YAR035W_mRNA	0
I	192549	192619	71	+	1.47204	6.39159	8.0472	0.015771	0.0293579	Promoter	1	192619	196185	3567	1	YAR042W	YAR042W_mRNA	0
I	31517	31542	26	+	7.88149	5.75919	94.7456	3.4662e-06	2.82049e-05	Promoter	1	31567	32940	1374	1	YAL062W	YAL062W_mRNA	-25
I	36511	36571	61	+	-2.35184	6.58935	58.9448	8.13282e-06	5.51174e-05	Promoter	1	36509	37147	639	1	YAL059W	YAL059W_mRNA	2
I	39190	39237	48	+	1.57145	6.28947	14.4861	0.00277032	0.00661775	Promoter	1	39259	41901	2643	1	YAL056W	YAL056W_mRNA	-22
I	45037	45102	66	-	11.3098	8.92865	664.17	5.58675e-10	8.49536e-08	Promoter	1	42881	45022	2142	2	YAL054C	YAL054C_mRNA	-80
I	45742	45951	210	+	2.38517	7.68882	66.8958	4.39823e-06	3.34926e-05	Promoter	1	45899	48250	2352	1	YAL053W	YAL053W_mRNA	0
I	52617	52669	53	-	1.31541	6.29558	11.6806	0.00552455	0.0119424	Promoter	1	51855	52595	741	2	YAL049C	YAL049C_mRNA	-74
I	76178	76199	22	-	-1.64746	5.35106	9.69367	0.00955629	0.019144	Promoter	1	75043	76152	1110	2	YAL036C	YAL036C_mRNA	-47
I	76364	76455	92	+	-1.06872	10.6375	49.1327	1.93021e-05	0.000106732	Promoter	1	76427	79435	3009	1	YAL035W	YAL035W_mRNA	0
I	81974	82006	33	-	1.51738	7.3905	43.8123	3.28139e-05	0.000161956	Promoter	1	80710	81951	1242	2	YAL034C	YAL034C_mRNA	-55
I	82688	82711	24	+	-2.37482	5.87454	17.2465	0.00151462	0.00395182	Promoter	1	82706	83227	522	1	YAL033W	YAL033W_mRNA	0
I	84482	84509	28	-	1.12334	6.65449	19.0833	0.00104819	0.00287837	Promoter	1	83335	84474	1140	2	YAL032C	YAL032C_mRNA	-35
I	92849	92893	45	+	-1.4086	6.27934	15.381	0.00226121	0.00557115	Promoter	1	92900	94486	1587	1	YAL028W	YAL028W_mRNA	-7
II	101161	101224	64	-	1.85107	8.24106	66.7793	4.43597e-06	3.37273e-05	Promoter	2	100371	101156	786	2	YBL064C	YBL064C_mRNA	-68
II	111383	111473	91	+	1.43949	8.23045	79.5285	1.86679e-06	1.71392e-05	Promoter	2	111437	112708	1272	1	YBL058W	YBL058W_mRNA	0
II	113626	113651	26	+	1.88958	5.4132	20.5562	0.000793368	0.00228163	Promoter	2	113762	115168	1407	1	YBL056W	YBL056W_mRNA	-111
II	117460	117491	32	+	-2.36713	5.84422	34.2143	9.91159e-05	0.00039565	Promoter	2	117589	119166	1578	1	YBL054W	YBL054W_mRNA	-98
II	126591	126717	127	+	9.18153	6.92755	243.609	5.40709e-08	1.139e-06	Promoter	2	126828	127244	417	1	YBL049W	YBL049W_mRNA	-111
II	132399	132432	34	+	-2.00939	5.96941	40.2534	4.82261e-05	0.000221177	Promoter	2	132424	133749	1326	1	YBL046W	YBL046W_mRNA	0
II	136527	136580	54	+	3.60857	6.7787	56.7895	9.72544e-06	6.32674e-05	Promoter	2	136688	137461	774	1	YBL043W	YBL043W_mRNA	-108
II	140316	140349	34	-	-1.81035	6.05985	28.9954	0.000200949	0.000721637	Promoter	2	138341	140260	1920	2	YBL042C	YBL042C_mRNA	-89
II	143270	143351	82	+	7.83652	5.72777	90.8138	4.15398e-06	3.21867e-05	Promoter	2	143393	143572	180	1	YBL039W-B	YBL039W-B_mRNA	-42
II	145758	145818	61	-	-4.85345	6.45327	106.006	4.33276e-07	5.65234e-06	Promoter	2	143989	145728	1740	2	YBL039C	YBL039C_mRNA	-90
II	159691	159724	34	-	1.09648	8.30321	53.4427	1.299e-05	7.83261e-05	Promoter	2	158656	159693	1038	2	YBL033C	YBL033C_mRNA	0
II	160074	160147	74	+	-1.22141	8.11684	52.3322	1.43478e-05	8.4626e-05	Promoter	2	160184	161329	1146	1	YBL032W	YBL032W_mRNA	-37
II	161661	161724	64	+	-1.13105	6.1315	13.753	0.00329071	0.00765421	Promoter	2	161699	162715	1017	1	YBL031W	YBL031W_mRNA	0
II	167850	167899	50	-	-1.11832	7.67343	28.2524	0.000223925	0.000789133	Promoter	2	167518	167838	321	2	YBL028C	YBL028C_mRNA	-61
II	168364	168418	55	+	-2.55337	10.022	244.726	5.11106e-09	2.29131e-07	Promoter	2	168423	169376	954	1	YBL027W	YBL027W_mRNA	-5
II	171399	171483	85	+	1.35473	6.10175	13.3659	0.00361184	0.00829019	Promoter	2	171481	171918	438	1	YBL025W	YBL025W_mRNA	0
II	172472	172530	59	+	-2.3807	6.73191	78.6619	1.97197e-06	1.77696e-05	Promoter	2	172534	174588	2055	1	YBL024W	YBL024W_mRNA	-4
II	194016	194083	68	+	2.56198	7.56003	138.423	1.07898e-07	1.94456e-06	Promoter	2	194122	195702	1581	1	YBL015W	YBL015W_mRNA	-39
II	201742	201792	51	-	-1.42545	5.33414	12.2338	0.00478749	0.0105455	Promoter	2	199064	201748	2685	2	YBL014C	YBL014C_mRNA	0
II	217380	217430	51	+	-1.93741	5.61552	11.0967	0.00645291	0.0136403	Promoter	2	217470	220400	2931	1	YBL005W	YBL005W_mRNA	-40
II	227499	227586	88	+	-1.57547	7.15531	29.0607	0.000199066	0.000715401	Promoter	2	227636	235117	7482	1	YBL004W	YBL004W_mRNA	-50
II	235786	235856	71	-	-2.47533	8.55018	207.027	1.26306e-08	4.29795e-07	Promoter	2	235394	235792	399	2	YBL003C	YBL003C_mRNA	0
II	236356	236518	163	+	-2.1217	8.50339	156.318	5.6753e-08	1.17515e-06	Promoter	2	236492	236887	396	1	YBL002W	YBL002W_mRNA	0
II	237404	237579	176	-	1.26305	9.22696	66.6899	4.46516e-06	3.38434e-05	Promoter	2	237153	237467	315	2	YBL001C	YBL001C_mRNA	0
II	241396	241447	52	-	1.70836	6.30466	31.5318	0.000140957	0.000531787	Promoter	2	238941	241283	2343	2	YBR001C	YBR001C_mRNA	-164
II	245813	245883	71	+	1.22107	6.70503	14.4334	0.00280434	0.00669574	Promoter	2	245906	246547	642	1	YBR005W	YBR005W_mRNA	-23
II	250947	251014	68	-	-1.69868	5.76812	13.4288	0.00355719	0.00817248	Promoter	2	248806	251016	2211	2	YBR007C	YBR007C_mRNA	69
II	255706	255782	77	-	-1.27025	8.86358	62.7074	6.02951e-06	4.35305e-05	Promoter	2	255373	255684	312	2	YBR009C	YBR009C_mRNA	-98
II	256303	256324	22	+	-1.03466	7.37256	25.688	0.000330924	0.00109499	Promoter	2	256331	256741	411	1	YBR010W	YBR010W_mRNA	-7
II	293968	294087	120	-	2.20314	7.44855	52.3459	1.433e-05	8.46234e-05	Promoter	2	292877	294019	1143	2	YBR026C	YBR026C_mRNA	0
II	300142	300160	19	+	-1.94481	7.88174	86.2866	1.23872e-06	1.25575e-05	Promoter	2	300166	301254	1089	1	YBR031W	YBR031W_mRNA	-6
II	305986	306005	20	-	-1.28431	5.6207	8.56281	0.0134116	0.025423	Promoter	2	304930	305976	1047	2	YBR034C	YBR034C_mRNA	-29
II	311461	311512	52	-	1.83864	7.72681	60.5447	7.14722e-06	4.96125e-05	Promoter	2	310565	311452	888	2	YBR037C	YBR037C_mRNA	-60
II	311777	311888	112	+	-1.33091	7.57213	31.1534	0.000148406	0.00055507	Promoter	2	311898	314789	2892	1	YBR038W	YBR038W_mRNA	-10
II	315481	315552	72	+	1.43773	9.43448	82.9201	1.51386e-06	1.43876e-05	Promoter	2	315575	316510	936	1	YBR039W	YBR039W_mRNA	-23
II	331504	331595	92	-	1.00884	8.19216	20.5138	0.00079959	0.00229546	Promoter	2	330507	331511	1005	2	YBR046C	YBR046C_mRNA	0
II	332733	332900	168	+	-2.44373	10.9537	123.98	1.9226e-07	2.94194e-06	Promoter	2	332831	333812	982	1	YBR048W	YBR048W_mRNA	0
II	336902	336967	66	-	1.02018	6.50593	11.3463	0.00603508	0.0128858	Promoter	2	334386	336818	2433	2	YBR049C	YBR049C_mRNA	-149
II	338121	338332	212	-	3.82079	8.13984	288.319	2.09356e-09	1.4133e-07	Promoter	2	337183	338199	1017	2	YBR050C	YBR050C_mRNA	0
II	340736	340782	47	-	1.12523	8.07087	48.2925	2.09212e-05	0.000113492	Promoter	2	339675	340751	1077	2	YBR053C	YBR053C_mRNA	0
II	347767	347885	119	+	1.11359	7.10413	24.1347	0.000425142	0.00135035	Promoter	2	347879	349384	1506	1	YBR056W	YBR056W_mRNA	0
II	365713	365754	42	-	-1.09991	6.47063	16.634	0.00172214	0.00440817	Promoter	2	364787	365719	933	2	YBR061C	YBR061C_mRNA	0
II	366578	366629	52	-	1.51158	7.26472	52.8313	1.37178e-05	8.14037e-05	Promoter	2	365976	366600	625	2	YBR062C	YBR062C_mRNA	0
II	36702	36830	129	+	1.36661	9.17937	91.2313	9.34053e-07	1.01453e-05	Promoter	2	37053	38690	1638	1	YBL099W	YBL099W_mRNA	-223
II	372351	372865	515	-	1.55715	11.0973	63.6879	5.59133e-06	4.0852e-05	Promoter	2	372103	372735	633	2	YBR067C	YBR067C_mRNA	0
II	380201	380381	181	+	1.94402	8.6125	64.0168	5.45284e-06	3.99e-05	Promoter	2	380411	381046	636	1	YBR071W	YBR071W_mRNA	-30
II	380434	380469	36	+	2.17883	6.19891	35.7123	8.21725e-05	0.000339144	Promoter	2	380411	381046	636	1	YBR071W	YBR071W_mRNA	23
II	381883	382395	513	+	4.52945	10.6139	512.196	8.84069e-11	3.50135e-08	Promoter	2	382030	382674	645	1	YBR072W	YBR072W_mRNA	0
II	398294	398312	19	-	-1.31694	6.66108	28.2513	0.000223961	0.000789133	Promoter	2	395383	398277	2895	2	YBR079C	YBR079C_mRNA	-35
II	40765	40789	25	+	-1.05624	5.66321	7.01333	0.0221781	0.0392027	Promoter	2	40831	43095	2265	1	YBL097W	YBL097W_mRNA	-42
II	410971	411040	70	+	-2.85632	6.43365	51.2072	1.58969e-05	9.15438e-05	Promoter	2	411054	413981	2928	1	YBR084W	YBR084W_mRNA	-14
II	415255	415343	89	-	-2.31078	9.99633	236.112	6.20743e-09	2.58165e-07	Promoter	2	414186	415261	1076	2	YBR084C-A	YBR084C-A_mRNA	0
II	419142	419255	114	-	1.34837	8.90439	88.5394	1.08731e-06	1.13537e-05	Promoter	2	418907	419164	258	2	YBR085C-A	YBR085C-A_mRNA	0
II	429115	429132	18	-	-7.46297	5.06943	74.581	9.54707e-06	6.24409e-05	Promoter	2	427698	429101	1404	2	YBR092C	YBR092C_mRNA	-31
II	447539	447603	65	+	1.90384	6.54448	46.243	2.55905e-05	0.00013318	Promoter	2	447709	449316	1608	1	YBR103W	YBR103W_mRNA	-106
II	449575	449607	33	+	-4.1558	4.844	29.5685	0.00018511	0.000672198	Promoter	2	449667	450656	990	1	YBR104W	YBR104W_mRNA	-60
II	451985	452114	130	-	-2.14817	8.1256	160.553	4.9242e-08	1.05563e-06	Promoter	2	450881	451969	1089	2	YBR105C	YBR105C_mRNA	-145
II	467290	467411	122	+	1.28061	6.21355	9.44684	0.0102713	0.0203674	Promoter	2	467248	469620	2373	1	YBR114W	YBR114W_mRNA	42
II	473945	474043	99	-	-2.15154	7.08018	98.3607	6.36398e-07	7.38859e-06	Promoter	2	469748	473926	4179	2	YBR115C	YBR115C_mRNA	-117
II	476458	476503	46	-	9.88373	7.57536	420.671	4.53393e-09	2.18437e-07	Promoter	2	474392	476437	2046	2	YBR117C	YBR117C_mRNA	-66
II	479268	479338	71	+	-1.94563	6.25719	38.7426	5.72635e-05	0.000253543	Promoter	2	479338	480323	986	1	YBR119W	YBR119W_mRNA	0
II	483361	483572	212	-	-1.61727	9.74442	87.0102	1.18753e-06	1.21909e-05	Promoter	2	481364	483367	2004	2	YBR121C	YBR121C_mRNA	0
II	486702	486773	72	-	1.08758	6.18389	9.3053	0.01071	0.0211162	Promoter	2	484742	486691	1950	2	YBR123C	YBR123C_mRNA	-82
II	501580	501629	50	-	2.75428	6.19456	42.6233	3.72104e-05	0.000178215	Promoter	2	499652	501442	1791	2	YBR132C	YBR132C_mRNA	-187
II	512937	513031	95	+	2.36248	6.89728	71.0036	3.28063e-06	2.71028e-05	Promoter	2	513044	513583	540	1	YBR137W	YBR137W_mRNA	-13
II	528234	528285	52	+	-1.09973	6.73984	16.9765	0.00160224	0.00414707	Promoter	2	528317	530638	2322	1	YBR142W	YBR142W_mRNA	-32
II	533706	533721	16	+	-1.32714	5.56004	8.01481	0.015935	0.0296066	Promoter	2	533762	534817	1056	1	YBR145W	YBR145W_mRNA	-41
II	549674	549742	69	+	-1.63473	6.12808	26.8883	0.0002747	0.000941346	Promoter	2	549771	550928	1158	1	YBR155W	YBR155W_mRNA	-29
II	554310	554398	89	-	2.12481	7.71826	111.982	3.26383e-07	4.46119e-06	Promoter	2	553543	554310	768	2	YBR157C	YBR157C_mRNA	0
II	564985	565016	32	+	-1.88189	5.35328	8.0224	0.0158964	0.0295574	Promoter	2	565231	565428	198	1	YBR162W-A	YBR162W-A_mRNA	-215
II	565604	565644	41	+	-1.70134	5.91424	17.1843	0.0015343	0.00399246	Promoter	2	565723	567480	1758	1	YBR163W	YBR163W_mRNA	-79
II	565728	565733	6	+	-2.35668	4.60532	13.7185	0.00331787	0.0077137	Promoter	2	565723	567480	1758	1	YBR163W	YBR163W_mRNA	5
II	571220	571246	27	-	-1.13578	6.9288	26.642	0.000285256	0.000972228	Promoter	2	569842	571200	1359	2	YBR166C	YBR166C_mRNA	-46
II	576011	576112	102	-	1.68023	8.34272	80.8763	1.71603e-06	1.59051e-05	Promoter	2	573915	575996	2082	2	YBR169C	YBR169C_mRNA	-116
II	578056	578159	104	-	1.02213	7.54577	22.5157	0.000558956	0.00170632	Promoter	2	576344	578086	1743	2	YBR170C	YBR170C_mRNA	0
II	592766	592839	74	-	-3.31401	9.57717	507.008	9.3542e-11	3.50135e-08	Promoter	2	591712	592774	1063	2	YBR181C	YBR181C_mRNA	0
II	59548	59608	61	-	1.04793	6.33095	13.1559	0.00380148	0.00866417	Promoter	2	51019	59382	8364	2	YBL088C	YBL088C_mRNA	-226
II	602505	602554	50	+	-4.34639	5.29647	39.6943	5.13594e-05	0.00023273	Promoter	2	602634	603476	843	1	YBR187W	YBR187W_mRNA	-80
II	604454	604537	84	+	-3.18726	9.69136	405.527	3.21738e-10	6.80685e-08	Promoter	2	604508	605508	1001	1	YBR189W	YBR189W_mRNA	0
II	606191	606276	86	+	-2.66599	9.05065	256.754	3.93832e-09	1.9555e-07	Promoter	2	606270	607140	871	1	YBR191W	YBR191W_mRNA	0
II	60757	60845	89	-	-3.13959	7.01788	107.264	4.07695e-07	5.37627e-06	Promoter	2	59822	60739	918	2	YBL087C	YBL087C_mRNA	-106
II	615848	615896	49	-	-1.00303	6.48466	12.2523	0.00476496	0.010501	Promoter	2	615203	615856	654	2	YBR197C	YBR197C_mRNA	0
II	620809	620841	33	+	1.99258	6.36399	27.9103	0.000235536	0.000823362	Promoter	2	620872	622527	1656	1	YBR200W	YBR200W_mRNA	-31
II	623422	623477	56	+	1.28764	7.77321	33.352	0.000110731	0.000432783	Promoter	2	623576	624211	636	1	YBR201W	YBR201W_mRNA	-99
II	628934	628989	56	+	1.32928	6.13187	14.8819	0.00252999	0.0061279	Promoter	2	629168	631942	2775	1	YBR203W	YBR203W_mRNA	-179
II	633406	633457	52	-	2.60378	6.15333	58.4054	8.50058e-06	5.64738e-05	Promoter	2	632254	633381	1128	2	YBR204C	YBR204C_mRNA	-76
II	670440	670514	75	+	1.76065	6.13461	20.3667	0.000821667	0.00235467	Promoter	2	670627	673329	2703	1	YBR225W	YBR225W_mRNA	-113
II	680011	680116	106	-	1.21875	10.4372	21.9387	0.000618279	0.00185253	Promoter	2	679549	680050	502	2	YBR230C	YBR230C_mRNA	0
II	683099	683170	72	-	1.88401	7.56411	59.152	7.99652e-06	5.44973e-05	Promoter	2	682179	683090	912	2	YBR231C	YBR231C_mRNA	-80
II	697286	697402	117	-	-4.31311	7.82702	250.257	4.527e-09	2.18437e-07	Promoter	2	695107	697302	2196	2	YBR238C	YBR238C_mRNA	0
II	704070	704095	26	-	3.24761	6.11636	39.1061	5.49185e-05	0.000245168	Promoter	2	702589	704055	1467	2	YBR241C	YBR241C_mRNA	-40
II	714449	714537	89	-	-1.16133	8.90929	56.8719	9.65813e-06	6.29979e-05	Promoter	2	713004	714455	1452	2	YBR247C	YBR247C_mRNA	0
II	716510	716561	52	-	-2.81928	6.17382	29.8919	0.000176823	0.00064496	Promoter	2	714807	716465	1659	2	YBR248C	YBR248C_mRNA	-96
II	718015	718130	116	-	-3.13909	7.5364	132.146	1.37693e-07	2.29457e-06	Promoter	2	716882	717994	1113	2	YBR249C	YBR249C_mRNA	-136
II	722559	722605	47	+	-1.92501	7.15095	96.2745	7.10119e-07	8.087e-06	Promoter	2	722611	723054	444	1	YBR252W	YBR252W_mRNA	-6
II	727044	727124	81	-	1.57696	7.75354	88.9237	1.06372e-06	1.11553e-05	Promoter	2	726618	727074	457	2	YBR255C-A	YBR255C-A_mRNA	0
II	736023	736099	77	-	1.00513	8.90045	27.7898	0.000239797	0.000835007	Promoter	2	735720	736040	321	2	YBR262C	YBR262C_mRNA	0
II	742510	742607	98	-	1.23715	9.21628	36.865	7.14276e-05	0.000300632	Promoter	2	742160	742576	417	2	YBR269C	YBR269C_mRNA	0
II	764664	764742	79	-	1.80673	6.12433	19.5337	0.000961168	0.00269105	Promoter	2	762784	764697	1914	2	YBR280C	YBR280C_mRNA	0
II	773771	773846	76	+	4.34147	5.72048	35.316	8.62984e-05	0.000353475	Promoter	2	773922	774356	435	1	YBR285W	YBR285W_mRNA	-76
II	776499	776548	50	+	1.0577	6.91251	18.6823	0.00113357	0.00307809	Promoter	2	776571	777854	1284	1	YBR287W	YBR287W_mRNA	-23
II	779504	779521	18	-	-1.28726	6.41511	21.1238	0.000715195	0.00210153	Promoter	2	778012	779463	1452	2	YBR288C	YBR288C_mRNA	-58
II	789093	789181	89	+	9.62631	7.32133	101.882	2.53828e-06	2.1742e-05	Promoter	2	789235	791814	2580	1	YBR294W	YBR294W_mRNA	-54
II	798551	798605	55	-	3.98165	7.91268	242.791	5.33606e-09	2.33921e-07	Promoter	2	796798	798522	1725	2	YBR296C	YBR296C_mRNA	-83
II	80687	80803	117	-	2.09383	9.20551	180.919	2.60472e-08	6.85112e-07	Promoter	2	80378	80731	354	2	YBL078C	YBL078C_mRNA	0
II	84269	84307	39	-	-2.28563	6.47687	56.7067	9.79356e-06	6.34709e-05	Promoter	2	81043	84261	3219	2	YBL076C	YBL076C_mRNA	-46
II	86456	86491	36	-	10.392	8.05082	504.479	1.97488e-09	1.39431e-07	Promoter	2	84499	86448	1950	2	YBL075C	YBL075C_mRNA	-43
II	90685	90712	28	+	-3.73923	5.65864	42.8806	3.62028e-05	0.000174074	Promoter	2	90741	92030	1290	1	YBL069W	YBL069W_mRNA	-29
II	92339	92396	58	+	-1.44951	5.86403	14.7618	0.00260026	0.00627621	Promoter	2	92414	93394	981	1	YBL068W	YBL068W_mRNA	-18
III	103344	103402	59	-	-1.01218	7.91696	38.7203	5.74108e-05	0.000253965	Promoter	3	102075	103358	1284	2	YCL011C	YCL011C_mRNA	0
III	104362	104394	33	-	1.2094	6.04827	14.5876	0.00270622	0.00648693	Promoter	3	103571	104350	780	2	YCL010C	YCL010C_mRNA	-44
III	105520	105598	79	-	-1.31569	8.51544	53.5179	1.29036e-05	7.79988e-05	Promoter	3	104619	105548	930	2	YCL009C	YCL009C_mRNA	0
III	106807	106919	113	-	-1.2341	8.37724	39.9973	4.96324e-05	0.000226771	Promoter	3	105696	106853	1158	2	YCL008C	YCL008C_mRNA	0
III	120478	120527	50	-	2.07824	7.91046	78.8875	1.94393e-06	1.76213e-05	Promoter	3	119575	120318	744	2	YCR004C	YCR004C_mRNA	-209
III	122338	122401	64	-	2.36307	7.85768	171.52	3.46374e-08	8.24065e-07	Promoter	3	120946	122328	1383	2	YCR005C	YCR005C_mRNA	-73
III	133173	133280	108	-	6.26535	9.61789	529.799	7.32953e-11	3.48983e-08	Promoter	3	132273	133124	852	2	YCR010C	YCR010C_mRNA	-156
III	143573	143626	54	+	-2.90439	6.61246	33.1177	0.000114159	0.000443335	Promoter	3	143634	144506	873	1	YCR016W	YCR016W_mRNA	-8
III	155227	155310	84	+	1.23582	5.9201	11.7773	0.00538643	0.0116698	Promoter	3	155320	155556	237	1	YCR020W-B	YCR020W-B_mRNA	-10
III	166389	166425	37	-	1.32861	6.8244	35.6395	8.29126e-05	0.00034162	Promoter	3	164111	166339	2229	2	YCR026C	YCR026C_mRNA	-86
III	16878	16944	67	-	1.06002	9.09566	51.6139	1.53151e-05	8.91428e-05	Promoter	3	15798	16880	1083	2	YCL064C	YCL064C_mRNA	0
III	17226	17317	92	+	-1.13076	7.00006	29.6835	0.000182111	0.000662791	Promoter	3	17290	18561	1272	1	YCL063W	YCL063W_mRNA	0
III	178220	178270	51	-	-2.31673	8.95535	267.856	3.12796e-09	1.76336e-07	Promoter	3	177500	178220	721	2	YCR031C	YCR031C_mRNA	0
III	190536	190566	31	+	-2.33445	5.33588	21.0152	0.000729422	0.00213303	Promoter	3	190592	191635	1044	1	YCR034W	YCR034W_mRNA	-26
III	206668	206703	36	-	-1.41824	6.32688	15.1029	0.00240657	0.00586105	Promoter	3	206261	206644	384	2	YCR043C	YCR043C_mRNA	-59
III	216593	216667	75	+	-1.47296	6.686	26.8173	0.000277695	0.000948922	Promoter	3	216697	218241	1545	1	YCR053W	YCR053W_mRNA	-30
III	220137	220184	48	-	-1.78222	4.97037	13.283	0.00368533	0.008435	Promoter	3	218376	220067	1692	2	YCR054C	YCR054C_mRNA	-117
III	22141	22172	32	-	1.96155	5.83344	19.1776	0.00102921	0.0028422	Promoter	3	18816	22106	3291	2	YCL061C	YCL061C_mRNA	-66
III	23384	23447	64	-	-2.06238	7.72608	118.046	2.48236e-07	3.57372e-06	Promoter	3	22429	23379	951	2	YCL059C	YCL059C_mRNA	-68
III	23519	23614	96	+	-1.10915	7.12791	27.6105	0.000246301	0.00085485	Promoter	3	23584	23925	342	1	YCL058W-A	YCL058W-A_mRNA	0
III	250018	250070	53	-	1.13862	6.45002	9.9863	0.00878372	0.0178016	Promoter	3	249293	250045	753	2	YCR076C	YCR076C_mRNA	0
III	258810	258913	104	+	1.05143	9.71472	47.4653	2.26738e-05	0.000121242	Promoter	3	258883	259269	387	1	YCR082W	YCR082W_mRNA	0
III	263299	263348	50	+	1.64876	5.59065	8.1422	0.0153013	0.0286122	Promoter	3	263392	263964	573	1	YCR086W	YCR086W_mRNA	-44
III	264431	264509	79	-	-2.14919	6.61371	30.774	0.000156346	0.000581635	Promoter	3	264006	264467	462	2	YCR087C-A	YCR087C-A_mRNA	0
III	27326	27399	74	-	1.81867	6.47826	37.6072	6.5384e-05	0.000279332	Promoter	3	26925	27359	435	2	YCL056C	YCL056C_mRNA	0
III	38799	38874	76	-	-1.19585	8.2733	69.2561	3.7095e-06	2.94461e-05	Promoter	3	37836	38801	966	2	YCL050C	YCL050C_mRNA	0
III	40739	40809	71	-	1.24352	6.27872	13.268	0.00369886	0.00845456	Promoter	3	39786	40724	939	2	YCL049C	YCL049C_mRNA	-85
III	48372	48447	76	-	2.18768	6.71653	39.2142	5.42431e-05	0.000243045	Promoter	3	47111	48364	1254	2	YCL044C	YCL044C_mRNA	-83
III	50778	50868	91	+	1.89586	8.80782	156.556	5.62955e-08	1.17066e-06	Promoter	3	50838	52340	1503	1	YCL040W	YCL040W_mRNA	0
III	58734	58772	39	-	-1.89545	7.23487	90.6677	9.63917e-07	1.03541e-05	Promoter	3	57374	58678	1305	2	YCL037C	YCL037C_mRNA	-94
III	61099	61264	166	-	1.65394	10.2141	137.88	1.1015e-07	1.97055e-06	Promoter	3	60841	61173	333	2	YCL035C	YCL035C_mRNA	0
III	63214	63293	80	-	2.71695	5.95552	21.0326	0.000727115	0.00212885	Promoter	3	62776	63282	507	2	YCL033C	YCL033C_mRNA	0
III	63364	63439	76	+	1.03133	7.44838	19.2362	0.00101764	0.00281836	Promoter	3	63441	64481	1041	1	YCL032W	YCL032W_mRNA	-2
III	68359	68415	57	-	-5.24416	7.79306	232.563	6.73826e-09	2.70978e-07	Promoter	3	65934	68333	2400	2	YCL030C	YCL030C_mRNA	-82
IV	1005564	1005651	88	+	1.38072	8.19937	37.2237	6.84282e-05	0.000290045	Promoter	4	1005675	1008689	3015	1	YDR270W	YDR270W_mRNA	-24
IV	1008926	1008991	66	+	1.2126	8.6562	82.8675	1.5187e-06	1.44054e-05	Promoter	4	1009010	1009834	825	1	YDR272W	YDR272W_mRNA	-19
IV	101068	101119	52	-	1.7355	6.66315	25.1714	0.000359231	0.00117105	Promoter	4	100501	101067	567	2	YDL200C	YDL200C_mRNA	-52
IV	1012155	1012181	27	+	3.01702	6.38915	86.5899	1.21695e-06	1.23885e-05	Promoter	4	1012252	1012959	708	1	YDR275W	YDR275W_mRNA	-71
IV	1015832	1015863	32	-	-1.22356	7.83086	51.0015	1.6201e-05	9.28476e-05	Promoter	4	1014401	1015702	1302	2	YDR277C	YDR277C_mRNA	-161
IV	1020592	1020705	114	+	-1.13507	7.96976	45.3029	2.8137e-05	0.000142768	Promoter	4	1020747	1021664	918	1	YDR280W	YDR280W_mRNA	-42
IV	1022352	1022479	128	-	2.89078	7.13972	80.3691	1.77102e-06	1.63525e-05	Promoter	4	1022007	1022321	315	2	YDR281C	YDR281C_mRNA	-158
IV	1024711	1024762	52	-	1.50497	5.9713	12.5699	0.0043965	0.00981798	Promoter	4	1023511	1024755	1245	2	YDR282C	YDR282C_mRNA	0
IV	103368	103422	55	-	1.09089	7.10299	15.7767	0.00207184	0.00515681	Promoter	4	101290	103353	2064	2	YDL199C	YDL199C_mRNA	-69
IV	1035907	1036003	97	+	2.082	6.97751	60.9854	6.90087e-06	4.82466e-05	Promoter	4	1035995	1036873	879	1	YDR287W	YDR287W_mRNA	0
IV	1056515	1056529	15	+	-5.40746	5.90324	83.9493	1.42273e-06	1.3628e-05	Promoter	4	1056551	1057600	1050	1	YDR297W	YDR297W_mRNA	-22
IV	1058890	1058994	105	-	2.16598	7.30058	81.7648	1.62446e-06	1.5172e-05	Promoter	4	1058176	1058814	639	2	YDR298C	YDR298C_mRNA	-180
IV	1059545	1059615	71	+	-2.1226	9.60378	99.5085	5.99688e-07	7.15216e-06	Promoter	4	1059627	1061231	1605	1	YDR299W	YDR299W_mRNA	-12
IV	1062797	1062869	73	-	-2.72068	6.00019	49.7668	1.81774e-05	0.000101668	Promoter	4	1061505	1062791	1287	2	YDR300C	YDR300C_mRNA	-78
IV	1067660	1067706	47	+	-1.21648	6.16984	19.009	0.0010634	0.00291358	Promoter	4	1067731	1068390	660	1	YDR302W	YDR302W_mRNA	-25
IV	1108099	1108171	73	-	1.02896	7.09893	28.449	0.000217558	0.000772728	Promoter	4	1106095	1108101	2007	2	YDR320C	YDR320C_mRNA	0
IV	1108483	1108537	55	-	3.09569	5.51298	17.1681	0.00153947	0.00400272	Promoter	4	1108280	1108498	219	2	YDR320C-A	YDR320C-A_mRNA	0
IV	1108652	1108680	29	+	-2.01129	5.88576	18.74	0.00112079	0.00305019	Promoter	4	1108702	1109847	1146	1	YDR321W	YDR321W_mRNA	-22
IV	1112288	1112339	52	-	1.77984	7.93878	108.388	3.8634e-07	5.13642e-06	Promoter	4	1112003	1112293	291	2	YDR322C-A	YDR322C-A_mRNA	0
IV	1127561	1127629	69	-	1.24409	7.76667	34.0452	0.000101275	0.00040229	Promoter	4	1126270	1127595	1326	2	YDR329C	YDR329C_mRNA	0
IV	1127788	1127845	58	+	1.45202	7.42862	27.5486	0.000248596	0.000861586	Promoter	4	1127872	1129374	1503	1	YDR330W	YDR330W_mRNA	-27
IV	1135768	1135798	31	+	1.18392	5.6805	8.3254	0.0144416	0.0271219	Promoter	4	1135932	1140476	4545	1	YDR334W	YDR334W_mRNA	-134
IV	1150500	1150560	61	-	-1.03051	7.546	31.6082	0.000139508	0.000527054	Promoter	4	1149951	1150520	570	2	YDR339C	YDR339C_mRNA	0
IV	1153617	1153718	102	-	-1.27254	7.26121	40.6961	4.59038e-05	0.000211904	Promoter	4	1151803	1153626	1824	2	YDR341C	YDR341C_mRNA	0
IV	1155962	1156108	147	-	1.15775	9.41281	43.4804	3.39764e-05	0.000166327	Promoter	4	1154216	1155928	1713	2	YDR342C	YDR342C_mRNA	-180
IV	1161405	1161422	18	-	7.70535	5.60753	76.7916	8.44667e-06	5.63806e-05	Promoter	4	1159608	1161320	1713	2	YDR343C	YDR343C_mRNA	-102
IV	1164677	1164697	21	-	-6.76739	7.22386	220.515	8.98513e-09	3.33753e-07	Promoter	4	1162957	1164660	1704	2	YDR345C	YDR345C_mRNA	-37
IV	1172008	1172040	33	-	-1.07076	5.89411	9.05272	0.0115494	0.022399	Promoter	4	1170326	1171825	1500	2	YDR348C	YDR348C_mRNA	-215
IV	117605	117699	95	+	-1.82837	9.50179	202.734	1.41391e-08	4.52637e-07	Promoter	4	117664	118517	854	1	YDL191W	YDL191W_mRNA	0
IV	1189535	1189738	204	-	1.65832	7.62187	59.5501	7.74214e-06	5.32108e-05	Promoter	4	1189199	1189567	369	2	YDR357C	YDR357C_mRNA	0
IV	1198772	1198821	50	-	1.353	5.6806	9.29666	0.0107375	0.0211361	Promoter	4	1196679	1198697	2019	2	YDR362C	YDR362C_mRNA	-124
IV	1201926	1201956	31	+	7.79435	5.68472	91.2713	4.06592e-06	3.17064e-05	Promoter	4	1202128	1202397	270	1	YDR363W-A	YDR363W-A_mRNA	-172
IV	1204166	1204242	77	-	1.66128	6.72847	21.1964	0.000705868	0.00207915	Promoter	4	1202843	1204210	1368	2	YDR364C	YDR364C_mRNA	0
IV	1206399	1206474	76	-	-2.82559	7.8684	276.465	2.63264e-09	1.58153e-07	Promoter	4	1204497	1206383	1887	2	YDR365C	YDR365C_mRNA	-91
IV	1206944	1206999	56	+	1.7485	7.68767	56.4921	9.97286e-06	6.42754e-05	Promoter	4	1206997	1208319	1323	1	YDR365W-A	YDR365W-A	0
IV	1212779	1212811	33	+	-1.30844	5.2919	7.18955	0.0208923	0.0373758	Promoter	4	1212848	1213614	767	1	YDR367W	YDR367W_mRNA	-37
IV	1213848	1213904	57	+	2.19039	6.0205	20.1965	0.000848131	0.00241769	Promoter	4	1213904	1214842	939	1	YDR368W	YDR368W_mRNA	0
IV	121987	122046	60	+	-1.28383	6.18995	16.8566	0.00164306	0.00424145	Promoter	4	122216	123589	1374	1	YDL189W	YDL189W_mRNA	-170
IV	1222658	1222726	69	+	1.16958	5.98491	9.86871	0.00908491	0.0182968	Promoter	4	1222759	1223331	573	1	YDR373W	YDR373W_mRNA	-33
IV	1228354	1228433	80	+	6.54347	8.03363	196.202	1.68622e-08	5.12822e-07	Promoter	4	1228611	1228916	306	1	YDR377W	YDR377W_mRNA	-178
IV	1228478	1228813	336	+	1.24889	11.1797	46.4709	2.50146e-05	0.000130462	Promoter	4	1228611	1228916	306	1	YDR377W	YDR377W_mRNA	0
IV	1234096	1234218	123	+	4.10855	7.8972	240.576	5.60806e-09	2.39867e-07	Promoter	4	1234218	1236125	1908	1	YDR380W	YDR380W_mRNA	0
IV	1238822	1238889	68	-	1.70192	6.08152	9.10467	0.0113705	0.0221227	Promoter	4	1238312	1238850	539	2	YDR381C-A	YDR381C-A_mRNA	0
IV	1239385	1239434	50	+	-2.00057	8.17027	135.958	1.18591e-07	2.08327e-06	Promoter	4	1239492	1239824	333	1	YDR382W	YDR382W_mRNA	-58
IV	1242060	1242160	101	-	2.85817	8.62319	265.217	3.30125e-09	1.76789e-07	Promoter	4	1241204	1242031	828	2	YDR384C	YDR384C_mRNA	-129
IV	1243117	1243214	98	+	-1.90007	8.79375	146.816	7.91022e-08	1.52328e-06	Promoter	4	1243230	1245758	2529	1	YDR385W	YDR385W_mRNA	-16
IV	1269986	1270076	91	+	-1.81926	7.48956	50.4516	1.70483e-05	9.67541e-05	Promoter	4	1270068	1270733	666	1	YDR399W	YDR399W_mRNA	0
IV	1277559	1277651	93	+	1.38034	8.29178	53.6992	1.26982e-05	7.68527e-05	Promoter	4	1277646	1278437	792	1	YDR405W	YDR405W_mRNA	0
IV	1288857	1288935	79	-	-2.92148	6.80942	34.9243	9.06182e-05	0.000368686	Promoter	4	1288215	1288859	645	2	YDR408C	YDR408C_mRNA	0
IV	1294426	1294467	42	-	1.65216	5.61637	14.0218	0.0030875	0.00725787	Promoter	4	1293369	1294394	1026	2	YDR411C	YDR411C_mRNA	-73
IV	1294607	1294708	102	+	-1.003	9.61552	61.324	6.71843e-06	4.74483e-05	Promoter	4	1294693	1295400	708	1	YDR412W	YDR412W_mRNA	0
IV	1301544	1301654	111	+	-2.51641	8.31442	174.68	3.14213e-08	7.75374e-07	Promoter	4	1301616	1302113	498	1	YDR418W	YDR418W_mRNA	0
IV	1305968	1306071	104	+	1.04899	7.33808	23.3401	0.000485439	0.00151711	Promoter	4	1306267	1311675	5409	1	YDR420W	YDR420W_mRNA	-196
IV	1319835	1319898	64	-	1.33242	6.41029	19.4368	0.000979137	0.00273349	Promoter	4	1319387	1319841	455	2	YDR424C	YDR424C_mRNA	0
IV	133391	133420	30	+	-1.04678	7.98265	37.9193	6.30239e-05	0.000271633	Promoter	4	133437	134723	1287	1	YDL182W	YDL182W_mRNA	-17
IV	1337263	1337307	45	+	-2.73451	5.01201	32.8783	0.000117793	0.000455989	Promoter	4	1337352	1337774	423	1	YDR437W	YDR437W_mRNA	-45
IV	1339575	1339624	50	+	-1.65487	5.41356	17.7329	0.00137066	0.00362086	Promoter	4	1339676	1340719	1044	1	YDR439W	YDR439W_mRNA	-52
IV	134990	135227	238	+	2.28536	9.28727	139.458	1.03746e-07	1.88368e-06	Promoter	4	135179	135436	258	1	YDL181W	YDL181W_mRNA	0
IV	1350198	1350225	28	+	-1.66699	5.50608	12.736	0.00421735	0.0094657	Promoter	4	1350290	1352353	2064	1	YDR444W	YDR444W_mRNA	-65
IV	1355561	1355590	30	-	-4.16858	7.46312	228.531	7.40755e-09	2.9305e-07	Promoter	4	1354829	1355553	725	2	YDR447C	YDR447C_mRNA	-37
IV	1358919	1358943	25	-	-2.97815	6.00755	60.9939	6.89624e-06	4.82466e-05	Promoter	4	1357580	1358902	1323	2	YDR449C	YDR449C_mRNA	-41
IV	1359878	1359939	62	+	-1.93257	9.59034	119.581	2.32104e-07	3.43288e-06	Promoter	4	1359923	1360798	876	1	YDR450W	YDR450W_mRNA	0
IV	1362710	1362765	56	+	1.4658	7.43736	56.0344	1.03684e-05	6.58649e-05	Promoter	4	1362878	1364902	2025	1	YDR452W	YDR452W_mRNA	-113
IV	1365682	1365744	63	-	3.81119	7.70378	64.7672	5.15169e-06	3.7982e-05	Promoter	4	1365072	1365662	591	2	YDR453C	YDR453C_mRNA	-82
IV	1366840	1366887	48	-	-1.56818	6.66527	23.8927	0.000442522	0.00139916	Promoter	4	1366264	1366827	564	2	YDR454C	YDR454C_mRNA	-60
IV	1385760	1385828	69	-	2.58127	6.72974	41.9551	3.99849e-05	0.000189636	Promoter	4	1385524	1385766	243	2	YDR461C-A	YDR461C-A_mRNA	0
IV	1394574	1394642	69	-	-1.92511	8.24847	67.6072	4.17589e-06	3.22538e-05	Promoter	4	1393336	1394574	1239	2	YDR465C	YDR465C_mRNA	0
IV	1401689	1401803	115	+	-2.33222	9.38247	269.686	3.0141e-09	1.72549e-07	Promoter	4	1401770	1402564	795	1	YDR471W	YDR471W_mRNA	0
IV	1402919	1402919	1	+	-3.14165	4.9851	16.5036	0.00177055	0.00450837	Promoter	4	1402919	1403042	124	1	snR13	snR13_snoRNA	0
IV	1410173	1410199	27	-	-1.4837	5.52349	16.0346	0.00195846	0.00492245	Promoter	4	1407464	1410094	2631	2	YDR475C	YDR475C_mRNA	-105
IV	1411137	1411192	56	-	1.52669	6.88023	6.80879	0.0237909	0.0415978	Promoter	4	1410453	1411127	675	2	YDR476C	YDR476C_mRNA	-65
IV	1414507	1414588	82	+	-1.199	7.53555	33.3084	0.00011136	0.000433821	Promoter	4	1414575	1415171	597	1	YDR478W	YDR478W_mRNA	0
IV	1428987	1429059	73	-	-1.15295	6.90789	27.7694	0.000240527	0.000836601	Promoter	4	1428354	1428980	627	2	YDR487C	YDR487C_mRNA	-79
IV	1430976	1431011	36	+	-2.15854	5.46133	22.3695	0.000573332	0.00174365	Promoter	4	1431012	1431896	885	1	YDR489W	YDR489W_mRNA	-1
IV	1434770	1434800	31	+	-2.83022	6.14426	81.3936	1.662e-06	1.54633e-05	Promoter	4	1434924	1435874	951	1	YDR492W	YDR492W_mRNA	-124
IV	1443407	1443471	65	-	-1.61334	8.82042	62.917	5.93252e-06	4.29578e-05	Promoter	4	1441433	1443403	1971	2	YDR496C	YDR496C_mRNA	-68
IV	1450766	1450926	161	-	-1.52394	8.59454	113.163	3.09111e-07	4.261e-06	Promoter	4	1450198	1450853	656	2	YDR500C	YDR500C_mRNA	0
IV	1451327	1451340	14	+	-2.473	5.87807	54.4066	1.19327e-05	7.31293e-05	Promoter	4	1451353	1452918	1566	1	YDR501W	YDR501W_mRNA	-13
IV	1459360	1459409	50	-	4.70642	6.02356	56.8545	9.67225e-06	6.30056e-05	Promoter	4	1456695	1459220	2526	2	YDR505C	YDR505C_mRNA	-189
IV	1461570	1461624	55	-	1.67849	6.19087	23.6658	0.000459576	0.00144557	Promoter	4	1459728	1461554	1827	2	YDR506C	YDR506C_mRNA	-70
IV	1468378	1468554	177	-	-1.70302	9.54553	77.889	2.0717e-06	1.84632e-05	Promoter	4	1466453	1468444	1992	2	YDR508C	YDR508C_mRNA	0
IV	1469953	1470032	80	+	1.4909	6.58674	15.7273	0.00209442	0.00520665	Promoter	4	1470017	1470418	402	1	YDR511W	YDR511W_mRNA	0
IV	1470953	1471089	137	+	1.7111	7.79963	105.286	4.48755e-07	5.79216e-06	Promoter	4	1470500	1471063	564	2	YDR512C	YDR512C_mRNA	0
IV	147531	147693	163	-	1.7675	9.37948	126.12	1.75813e-07	2.76863e-06	Promoter	4	145826	147589	1764	2	YDL174C	YDL174C_mRNA	0
IV	1476477	1476588	112	-	-1.11272	7.66286	29.9548	0.000175262	0.00064026	Promoter	4	1474974	1476476	1503	2	YDR516C	YDR516C_mRNA	-112
IV	1480356	1480427	72	+	1.36679	7.3877	47.1308	2.34312e-05	0.000124065	Promoter	4	1480425	1480832	408	1	YDR519W	YDR519W_mRNA	0
IV	1489034	1489085	52	-	-1.4102	7.41072	38.1528	6.13236e-05	0.000266833	Promoter	4	1487542	1488990	1449	2	YDR524C	YDR524C_mRNA	-95
IV	1489780	1489866	87	-	-1.21564	9.69064	78.5006	1.99231e-06	1.79197e-05	Promoter	4	1489598	1489798	201	2	YDR524C-B	YDR524C-B_mRNA	0
IV	1490481	1490575	95	+	1.15924	6.48643	10.4956	0.00760857	0.0157345	Promoter	4	1490596	1490835	240	1	YDR525W-A	YDR525W-A_mRNA	-21
IV	1493008	1493026	19	-	1.8429	6.0052	23.2225	0.000495194	0.00154364	Promoter	4	1492477	1493026	550	2	snR84	snR84_snoRNA	0
IV	1497762	1497837	76	-	1.79127	5.91922	24.7509	0.000384399	0.00123873	Promoter	4	1496791	1497768	978	2	YDR530C	YDR530C_mRNA	0
IV	1501987	1502222	236	-	4.68484	9.63267	438.708	2.08397e-10	5.33716e-08	Promoter	4	1501447	1502160	714	2	YDR533C	YDR533C_mRNA	0
IV	158721	158789	69	-	2.98859	8.57783	277.302	2.58959e-09	1.57512e-07	Promoter	4	158064	158735	672	2	YDL169C	YDL169C_mRNA	0
IV	159522	159588	67	+	1.08862	6.24615	10.8599	0.00688158	0.0144522	Promoter	4	159604	160764	1161	1	YDL168W	YDL168W_mRNA	-16
IV	163188	163213	26	-	-1.38638	6.40277	16.8071	0.00166026	0.0042813	Promoter	4	160995	163154	2160	2	YDL167C	YDL167C_mRNA	-59
IV	183001	183105	105	-	-1.20301	10.183	48.6054	2.03004e-05	0.000111366	Promoter	4	181186	183018	1833	2	YDL153C	YDL153C_mRNA	0
IV	183203	183262	60	+	-1.45791	7.21379	53.1608	1.33197e-05	7.99184e-05	Promoter	4	183343	184611	1269	1	YDL150W	YDL150W_mRNA	-81
IV	184872	184959	88	+	1.71541	7.8152	85.9766	1.26144e-06	1.25657e-05	Promoter	4	184925	187918	2994	1	YDL149W	YDL149W_mRNA	0
IV	18737	18780	44	-	8.59858	6.39573	152.821	4.3299e-07	5.65234e-06	Promoter	4	17577	18566	990	2	YDL243C	YDL243C_mRNA	-214
IV	190600	190664	65	-	-2.30283	8.51257	240.127	5.66516e-09	2.39867e-07	Promoter	4	188154	190586	2433	2	YDL148C	YDL148C_mRNA	-78
IV	199739	199792	54	-	1.21841	7.35806	17.2717	0.00150675	0.00393338	Promoter	4	198662	199732	1071	2	YDL144C	YDL144C_mRNA	-60
IV	202800	202848	49	+	-1.34863	5.21545	8.44741	0.013901	0.0262077	Promoter	4	203039	205111	2073	1	YDL141W	YDL141W_mRNA	-191
IV	217534	217591	58	+	-2.64201	8.01082	154.506	6.03727e-08	1.2448e-06	Promoter	4	217600	218367	768	1	YDL136W	YDL136W_mRNA	-9
IV	222271	222370	100	+	1.86602	6.87331	52.1371	1.46032e-05	8.58202e-05	Promoter	4	222427	223740	1314	1	YDL133W	YDL133W_mRNA	-57
IV	227341	227393	53	+	-1.32877	7.10881	46.5962	2.47043e-05	0.000129121	Promoter	4	227393	228715	1323	1	YDL131W	YDL131W_mRNA	0
IV	229091	229355	265	+	1.73675	10.4189	62.4212	6.16494e-06	4.42875e-05	Promoter	4	229171	229431	261	1	YDL130W-A	YDL130W-A_mRNA	0
IV	229794	229897	104	+	-1.98537	9.25036	118.531	2.43e-07	3.5513e-06	Promoter	4	229906	230527	622	1	YDL130W	YDL130W_mRNA	-9
IV	230855	230997	143	+	-1.85419	6.27668	22.393	0.000570986	0.0017376	Promoter	4	231024	231899	876	1	YDL129W	YDL129W_mRNA	-27
IV	238629	238744	116	-	1.01855	9.46886	56.6867	9.81014e-06	6.34709e-05	Promoter	4	236157	238664	2508	2	YDL126C	YDL126C_mRNA	0
IV	239711	239816	106	-	2.36258	8.48934	34.7201	9.29706e-05	0.000375945	Promoter	4	239019	239606	588	2	YDL125C	YDL125C_mRNA	-210
IV	240124	240283	160	+	1.50334	10.4081	126.376	1.73957e-07	2.75725e-06	Promoter	4	240259	241197	939	1	YDL124W	YDL124W_mRNA	0
IV	242312	242362	51	+	-2.12366	5.55893	19.2858	0.00100795	0.00279628	Promoter	4	242552	244981	2430	1	YDL122W	YDL122W_mRNA	-190
IV	258835	258870	36	+	-1.37504	6.23271	19.5424	0.000959569	0.00269105	Promoter	4	258915	263225	4311	1	YDL112W	YDL112W_mRNA	-45
IV	264935	265036	102	-	1.76039	8.36383	104.941	4.56407e-07	5.85983e-06	Promoter	4	264512	264964	453	2	YDL110C	YDL110C_mRNA	0
IV	286662	286759	98	-	1.61926	8.36603	58.6193	8.3524e-06	5.61364e-05	Promoter	4	285391	286695	1305	2	YDL097C	YDL097C_mRNA	0
IV	303094	303189	96	+	5.10789	7.2221	163.556	4.46216e-08	9.91455e-07	Promoter	4	303211	304848	1638	1	YDL085W	YDL085W_mRNA	-22
IV	307783	307826	44	-	-3.47191	8.47634	406.74	3.16478e-10	6.80685e-08	Promoter	4	306926	307789	864	2	YDL083C	YDL083C_mRNA	0
IV	308333	308419	87	+	-2.84036	9.26521	370.872	5.26357e-10	8.29424e-08	Promoter	4	308424	309388	965	1	YDL082W	YDL082W_mRNA	-5
IV	310130	310235	106	-	-1.72225	8.00636	84.8762	1.34614e-06	1.31798e-05	Promoter	4	309802	310122	321	2	YDL081C	YDL081C_mRNA	-113
IV	314734	314861	128	-	-1.01061	9.34804	11.1471	0.00636587	0.0134856	Promoter	4	312951	314748	1798	2	YDL079C	YDL079C_mRNA	0
IV	316398	316464	67	-	1.04023	7.17015	10.9033	0.00680042	0.0142941	Promoter	4	315357	316388	1032	2	YDL078C	YDL078C_mRNA	-76
IV	322103	322232	130	+	-2.41166	9.4545	297.348	1.76896e-09	1.36631e-07	Promoter	4	322226	322988	763	1	YDL075W	YDL075W_mRNA	0
IV	326172	326236	65	-	-1.18044	6.34048	20.9404	0.000739416	0.00215578	Promoter	4	324047	326149	2103	2	YDL074C	YDL074C_mRNA	-87
IV	330452	330518	67	-	1.47778	7.86666	64.772	5.14981e-06	3.7982e-05	Promoter	4	329836	330447	612	2	YDL072C	YDL072C_mRNA	-71
IV	334370	334454	85	-	1.29579	9.08795	59.9238	7.512e-06	5.17021e-05	Promoter	4	334217	334396	180	2	YDL067C	YDL067C_mRNA	0
IV	363903	363943	41	+	-1.85849	7.80491	94.2138	7.93007e-07	8.87074e-06	Promoter	4	363952	364779	828	1	YDL051W	YDL051W_mRNA	-9
IV	36522	36625	104	-	1.39425	7.22674	42.2092	3.89022e-05	0.000185405	Promoter	4	34237	36477	2241	2	YDL234C	YDL234C_mRNA	-148
IV	365889	365973	85	-	7.68889	5.59366	81.1902	6.68112e-06	4.72534e-05	Promoter	4	365068	365874	807	2	YDL049C	YDL049C_mRNA	-99
IV	368162	368361	200	-	-1.93456	9.38965	192.321	1.87718e-08	5.50263e-07	Promoter	4	366739	368211	1473	2	YDL048C	YDL048C_mRNA	0
IV	381465	381500	36	-	-1.2753	7.25664	43.1052	3.53498e-05	0.000171498	Promoter	4	378874	381438	2565	2	YDL040C	YDL040C_mRNA	-62
IV	385765	385787	23	-	-7.7597	5.32357	93.6657	3.64034e-06	2.90392e-05	Promoter	4	384601	385587	987	2	YDL037C	YDL037C_mRNA	-200
IV	403388	403467	80	-	1.01553	5.91827	7.03157	0.0220407	0.0390426	Promoter	4	400997	403291	2295	2	YDL028C	YDL028C_mRNA	-176
IV	413855	413988	134	+	1.82918	7.67894	64.3809	5.30422e-06	3.89884e-05	Promoter	4	413953	414888	936	1	YDL021W	YDL021W_mRNA	0
IV	416673	416855	183	-	2.54491	8.95935	282.385	2.34528e-09	1.50123e-07	Promoter	4	415113	416708	1596	2	YDL020C	YDL020C_mRNA	0
IV	427215	427292	78	+	-2.83771	7.0427	103.892	4.80615e-07	6.09029e-06	Promoter	4	427364	428347	984	1	YDL014W	YDL014W_mRNA	-72
IV	44026	44044	19	+	-2.90214	7.34308	203.662	1.37959e-08	4.47539e-07	Promoter	4	44065	45906	1842	1	YDL229W	YDL229W_mRNA	-21
IV	444556	444579	24	+	-3.56448	4.91981	19.8674	0.000902172	0.00255082	Promoter	4	444683	446383	1701	1	YDL003W	YDL003W_mRNA	-104
IV	447607	447714	108	-	-1.01594	8.12998	44.4806	3.06122e-05	0.000153724	Promoter	4	446967	447578	612	2	YDL002C	YDL002C_mRNA	-136
IV	452813	452837	25	+	1.4156	5.83001	13.1376	0.00381857	0.00869905	Promoter	4	453045	453650	606	1	YDR002W	YDR002W_mRNA	-208
IV	454030	454143	114	+	1.02859	7.39385	22.0064	0.000610948	0.00183397	Promoter	4	454122	454754	633	1	YDR003W	YDR003W_mRNA	0
IV	465657	465687	31	+	-1.31397	6.7336	27.8473	0.000237753	0.000830394	Promoter	4	465919	470424	4506	1	YDR011W	YDR011W_mRNA	-232
IV	471809	471843	35	+	-2.19592	6.04574	46.5073	2.4924e-05	0.000130129	Promoter	4	471853	472941	1089	1	YDR012W	YDR012W_mRNA	-10
IV	477770	477796	27	+	7.08601	5.09136	55.2612	3.28172e-05	0.000161956	Promoter	4	477797	478285	489	1	YDR014W-A	YDR014W-A_mRNA	-1
IV	483838	483891	54	-	7.08371	5.07941	51.9764	4.20065e-05	0.000196353	Promoter	4	482670	483860	1191	2	YDR018C	YDR018C_mRNA	0
IV	486668	486727	60	+	-2.0658	5.72452	23.4823	0.000473944	0.00148548	Promoter	4	486804	488003	1200	1	YDR021W	YDR021W_mRNA	-77
IV	488666	488739	74	-	1.55038	8.25163	103.699	4.85248e-07	6.10357e-06	Promoter	4	488072	488662	591	2	YDR022C	YDR022C_mRNA	-77
IV	489452	489500	49	+	-1.63204	8.80764	140.314	1.00456e-07	1.83633e-06	Promoter	4	489508	490896	1389	1	YDR023W	YDR023W_mRNA	-8
IV	491413	491546	134	+	-2.11079	9.76444	170.334	3.59438e-08	8.4494e-07	Promoter	4	491515	492324	810	1	YDR025W	YDR025W_mRNA	0
IV	494134	494277	144	-	2.22971	7.78998	43.5431	3.37534e-05	0.000165736	Promoter	4	492556	494268	1713	2	YDR026C	YDR026C_mRNA	0
IV	497385	497449	65	-	1.94173	5.82196	16.2563	0.00186683	0.00471651	Promoter	4	494649	497318	2670	2	YDR027C	YDR027C_mRNA	-131
IV	503440	503500	61	+	1.71832	6.31454	31.3119	0.000145232	0.000545326	Promoter	4	503498	503863	366	1	YDR031W	YDR031W_mRNA	0
IV	504730	504768	39	-	2.20935	8.20325	177.717	2.86568e-08	7.22507e-07	Promoter	4	504099	504695	597	2	YDR032C	YDR032C_mRNA	-73
IV	507875	507951	77	+	-1.3313	7.59786	37.0657	6.97309e-05	0.000294796	Promoter	4	508147	509109	963	1	YDR033W	YDR033W_mRNA	-196
IV	512239	512261	23	-	-1.10523	5.48528	7.33638	0.0198886	0.0359368	Promoter	4	509737	512109	2373	2	YDR034C	YDR034C_mRNA	-152
IV	521255	521321	67	+	3.4334	7.3805	108.397	3.86181e-07	5.13642e-06	Promoter	4	521314	521469	156	1	YDR034W-B	YDR034W-B_mRNA	0
IV	521727	521843	117	+	-1.16521	7.80502	53.9888	1.23781e-05	7.51022e-05	Promoter	4	521816	522928	1113	1	YDR035W	YDR035W_mRNA	0
IV	525324	525431	108	+	-3.32034	8.48225	344.722	7.86826e-10	9.11594e-08	Promoter	4	525440	527215	1776	1	YDR037W	YDR037W_mRNA	-9
IV	538575	538619	45	-	-1.85849	5.56615	8.75649	0.0126356	0.0242352	Promoter	4	535192	538467	3276	2	YDR040C	YDR040C_mRNA	-152
IV	548431	548469	39	-	-2.04842	5.52725	23.1948	0.000497531	0.00154993	Promoter	4	547978	548310	333	2	YDR045C	YDR045C_mRNA	-159
IV	550651	550679	29	-	-1.91182	7.27721	78.8524	1.94827e-06	1.76213e-05	Promoter	4	548762	550576	1815	2	YDR046C	YDR046C_mRNA	-103
IV	551703	551750	48	+	1.41461	5.9528	16.4123	0.00180539	0.00458749	Promoter	4	551860	552948	1089	1	YDR047W	YDR047W_mRNA	-110
IV	562336	562537	202	-	1.31717	7.44664	23.953	0.000438114	0.00138642	Promoter	4	561440	562327	888	2	YDR054C	YDR054C_mRNA	-210
IV	563448	563487	40	+	1.8954	9.39953	194.496	1.76719e-08	5.3081e-07	Promoter	4	563527	564861	1335	1	YDR055W	YDR055W_mRNA	-40
IV	569779	569857	79	-	2.92803	7.41118	184.42	2.35068e-08	6.3451e-07	Promoter	4	569234	569770	537	2	YDR059C	YDR059C_mRNA	-87
IV	570555	570627	73	+	-2.50308	8.48473	120.259	2.25371e-07	3.35369e-06	Promoter	4	570649	573726	3078	1	YDR060W	YDR060W_mRNA	-22
IV	579360	579523	164	+	-2.45437	9.06836	211.785	1.11745e-08	3.91187e-07	Promoter	4	579458	580452	995	1	YDR064W	YDR064W_mRNA	0
IV	587693	587792	100	-	1.47034	7.41936	47.1479	2.33919e-05	0.000124065	Promoter	4	584939	587719	2781	2	YDR069C	YDR069C_mRNA	0
IV	588285	588557	273	-	3.93649	9.40378	265.157	3.30534e-09	1.76789e-07	Promoter	4	588098	588379	282	2	YDR070C	YDR070C_mRNA	0
IV	591470	591540	71	-	-1.19509	5.96651	7.49225	0.0188853	0.0343664	Promoter	4	589761	591344	1584	2	YDR072C	YDR072C_mRNA	-196
IV	592445	592478	34	+	1.38941	7.12485	27.0256	0.000269015	0.000924454	Promoter	4	592439	592948	510	1	YDR073W	YDR073W_mRNA	6
IV	593609	593729	121	+	-2.30835	5.59109	16.0162	0.0019663	0.00493961	Promoter	4	593893	596583	2691	1	YDR074W	YDR074W_mRNA	-164
IV	600706	601621	916	+	1.74931	12.5651	77.438	2.13264e-06	1.87997e-05	Promoter	4	600793	601809	1017	1	YDR077W	YDR077W_mRNA	0
IV	60442	60468	27	-	8.11223	5.96974	108.817	1.91064e-06	1.74759e-05	Promoter	4	57265	60405	3141	2	YDL223C	YDL223C_mRNA	-63
IV	612043	612060	18	+	-1.79998	8.41031	112.236	3.22577e-07	4.42158e-06	Promoter	4	612073	613251	1179	1	YDR083W	YDR083W_mRNA	-13
IV	616157	616329	173	-	2.34015	8.76042	216.966	9.80801e-09	3.56708e-07	Promoter	4	614288	616150	1863	2	YDR085C	YDR085C_mRNA	-179
IV	618319	618366	48	-	-3.55906	6.93238	86.4169	1.22931e-06	1.24881e-05	Promoter	4	617470	618306	837	2	YDR087C	YDR087C_mRNA	-60
IV	61869	61932	64	-	4.28617	7.37712	102.68	5.10514e-07	6.33715e-06	Promoter	4	60872	61801	930	2	YDL222C	YDL222C_mRNA	-131
IV	628547	628606	60	-	-1.42452	5.97067	19.4448	0.000977645	0.0027309	Promoter	4	626708	628534	1827	2	YDR091C	YDR091C_mRNA	-72
IV	636486	636626	141	+	1.26087	6.88578	20.5787	0.000790072	0.00227485	Promoter	4	636117	636527	411	2	YDR095C	YDR095C_mRNA	0
IV	637046	637078	33	+	-2.065	5.12363	11.0161	0.00659521	0.0139108	Promoter	4	637139	639823	2685	1	YDR096W	YDR096W_mRNA	-61
IV	65188	65241	54	+	-2.20053	5.9004	14.5911	0.00270401	0.00648693	Promoter	4	65242	65765	524	1	YDL219W	YDL219W_mRNA	-1
IV	657482	657494	13	-	-1.92261	6.66665	40.1037	4.90424e-05	0.000224497	Promoter	4	655686	657467	1782	2	YDR101C	YDR101C_mRNA	-27
IV	658227	658365	139	+	-1.21122	7.44727	22.9185	0.000521505	0.00161223	Promoter	4	658350	661103	2754	1	YDR103W	YDR103W_mRNA	0
IV	66436	66477	42	+	8.58888	6.38479	166.548	2.95941e-07	4.12621e-06	Promoter	4	66493	67446	954	1	YDL218W	YDL218W_mRNA	-16
IV	664931	664984	54	-	1.33668	6.05525	13.9328	0.0031531	0.00738352	Promoter	4	661173	664910	3738	2	YDR104C	YDR104C_mRNA	-74
IV	690945	690987	43	+	1.4369	7.27772	47.1991	2.32742e-05	0.000123773	Promoter	4	691014	691214	201	1	YDR119W-A	YDR119W-A_mRNA	-27
IV	693230	693241	12	-	-1.42685	6.16911	15.3786	0.00226243	0.00557135	Promoter	4	691549	693261	1713	2	YDR120C	YDR120C_mRNA	31
IV	693442	693488	47	+	-1.75443	7.25467	57.7093	9.00454e-06	5.92911e-05	Promoter	4	693585	694175	591	1	YDR121W	YDR121W_mRNA	-97
IV	702634	702767	134	-	1.75883	7.75833	72.7989	2.89949e-06	2.44099e-05	Promoter	4	701397	702758	1362	2	YDR125C	YDR125C_mRNA	0
IV	704394	704461	68	+	-1.77477	6.22432	41.1426	4.36937e-05	0.000202489	Promoter	4	704484	709250	4767	1	YDR127W	YDR127W_mRNA	-23
IV	733901	733996	96	-	1.12838	6.22209	7.82375	0.0169452	0.0312805	Promoter	4	733618	733924	307	2	YDR139C	YDR139C_mRNA	0
IV	73935	74159	225	-	2.5503	8.96726	179.782	2.69403e-08	6.97907e-07	Promoter	4	70640	73918	3279	2	YDL215C	YDL215C_mRNA	-241
IV	765213	765271	59	-	-1.27572	6.28065	15.5808	0.00216315	0.00535942	Promoter	4	764178	765155	978	2	YDR151C	YDR151C_mRNA	-116
IV	765319	765347	29	-	-2.17942	5.15777	21.6547	0.000650182	0.00193504	Promoter	4	764178	765155	978	2	YDR151C	YDR151C_mRNA	-192
IV	76577	76675	99	-	8.39219	6.21121	144.651	5.51654e-07	6.67749e-06	Promoter	4	74446	76545	2100	2	YDL214C	YDL214C_mRNA	-130
IV	768019	768043	25	-	-1.74213	5.19776	7.05182	0.0218893	0.0388377	Promoter	4	766736	767971	1236	2	YDR153C	YDR153C_mRNA	-72
IV	770310	770386	77	+	-2.65562	9.83688	263.57	3.41515e-09	1.76789e-07	Promoter	4	770357	771454	1098	1	YDR158W	YDR158W_mRNA	0
IV	775948	776060	113	+	1.13943	6.0982	12.3299	0.00467168	0.0103376	Promoter	4	776163	778721	2559	1	YDR160W	YDR160W_mRNA	-103
IV	778970	779025	56	+	-2.76518	6.24937	43.0293	3.56354e-05	0.000172196	Promoter	4	779043	780206	1164	1	YDR161W	YDR161W_mRNA	-18
IV	784801	784861	61	+	-2.89162	6.77828	129.678	1.51996e-07	2.47105e-06	Promoter	4	784871	786205	1335	1	YDR165W	YDR165W_mRNA	-10
IV	802183	802261	79	-	1.49669	6.18572	12.8795	0.00406943	0.00920161	Promoter	4	796193	802222	6030	2	YDR170C	YDR170C_mRNA	0
IV	803142	803142	1	+	-1.59942	7.24458	64.9207	5.0925e-06	3.77305e-05	Promoter	4	803195	804517	1323	1	YDR170W-A	YDR170W-A	-53
IV	812195	812274	80	+	-2.63702	6.12063	70.8022	3.32696e-06	2.7439e-05	Promoter	4	812110	812850	741	1	YDR174W	YDR174W_mRNA	85
IV	827356	827414	59	-	1.28461	6.41868	21.3956	0.000681002	0.00201322	Promoter	4	825910	827355	1446	2	YDR181C	YDR181C_mRNA	-59
IV	831500	831619	120	-	-2.61305	8.53676	184.553	2.34166e-08	6.3451e-07	Promoter	4	830629	831513	885	2	YDR184C	YDR184C_mRNA	0
IV	850949	851076	128	-	1.23853	7.28365	38.7821	5.70029e-05	0.00025308	Promoter	4	850274	850999	726	2	YDR196C	YDR196C_mRNA	0
IV	87443	87503	61	+	-1.87713	8.06421	89.3675	1.03721e-06	1.09008e-05	Promoter	4	87512	87982	471	1	YDL208W	YDL208W_mRNA	-9
IV	884653	884711	59	+	-1.61334	5.55854	17.9591	0.00130924	0.00348202	Promoter	4	884727	886865	2139	1	YDR211W	YDR211W_mRNA	-16
IV	889489	889591	103	+	-1.50206	7.66321	47.1395	2.34112e-05	0.000124065	Promoter	4	889751	892492	2742	1	YDR213W	YDR213W_mRNA	-160
IV	917420	917491	72	+	1.36531	7.10895	22.6886	0.000542508	0.00166192	Promoter	4	917571	921647	4077	1	YDR227W	YDR227W_mRNA	-80
IV	930314	930451	138	-	-1.7467	9.30437	133.74	1.29294e-07	2.2153e-06	Promoter	4	929470	930357	888	2	YDR233C	YDR233C_mRNA	0
IV	933473	933524	52	+	-1.00749	6.02854	7.6898	0.0176991	0.0324384	Promoter	4	933504	935138	1635	1	YDR235W	YDR235W_mRNA	0
IV	94540	94605	66	+	2.07605	8.98435	167.574	3.92135e-08	9.08633e-07	Promoter	4	94605	95786	1182	1	YDL204W	YDL204W_mRNA	0
IV	952697	952742	46	+	-1.12454	7.12489	26.5965	0.000287258	0.00097748	Promoter	4	952800	953981	1182	1	YDR245W	YDR245W_mRNA	-58
IV	969664	969730	67	-	9.27361	7.01072	280.051	2.88242e-08	7.22983e-07	Promoter	4	968133	969680	1548	2	YDR256C	YDR256C_mRNA	0
IV	975941	976003	63	-	1.66197	5.70186	15.973	0.00198488	0.00497723	Promoter	4	974631	975782	1152	2	YDR259C	YDR259C_mRNA	-221
IV	99458	99544	87	+	-1.06844	6.9851	27.1788	0.000262838	0.000905785	Promoter	4	99561	100421	861	1	YDL201W	YDL201W_mRNA	-17
IV	998324	998447	124	-	1.46817	7.5214	46.7585	2.43094e-05	0.00012733	Promoter	4	996029	998323	2295	2	YDR264C	YDR264C_mRNA	-124
IX	102256	102329	74	-	-2.3757	5.63834	17.7824	0.00135693	0.00359045	Promoter	9	100781	102235	1455	2	YIL131C	YIL131C_mRNA	-94
IX	102631	102686	56	+	1.04263	6.29208	12.6922	0.00426377	0.00955667	Promoter	9	102782	105676	2895	1	YIL130W	YIL130W_mRNA	-96
IX	117652	117722	71	-	-1.97587	8.90151	149.25	7.25156e-08	1.43439e-06	Promoter	9	117024	117644	621	2	YIL127C	YIL127C_mRNA	-78
IX	122386	122590	205	+	2.12339	8.87306	178.224	2.82239e-08	7.15299e-07	Promoter	9	122689	125733	3045	1	YIL125W	YIL125W_mRNA	-99
IX	126146	126237	92	+	2.33878	6.45681	44.2942	3.12083e-05	0.000155435	Promoter	9	126204	127097	894	1	YIL124W	YIL124W_mRNA	0
IX	128085	128110	26	+	-3.24214	5.5235	42.2806	3.86042e-05	0.000184203	Promoter	9	128151	129581	1431	1	YIL123W	YIL123W_mRNA	-41
IX	132186	132240	55	+	-1.86242	6.53366	32.0735	0.000131045	0.000498449	Promoter	9	132244	133872	1629	1	YIL121W	YIL121W_mRNA	-4
IX	141606	141720	115	-	5.70488	6.91206	113.34	3.06627e-07	4.25084e-06	Promoter	9	140613	141569	957	2	YIL117C	YIL117C_mRNA	-151
IX	142858	142901	44	+	-1.56612	6.85267	39.6711	5.1495e-05	0.000233093	Promoter	9	142928	144085	1158	1	YIL116W	YIL116W_mRNA	-27
IX	150005	150056	52	-	-1.18405	5.61036	7.78236	0.017174	0.0316548	Promoter	9	149143	149988	846	2	YIL114C	YIL114C_mRNA	-68
IX	155176	155202	27	+	-3.37244	5.48407	16.0831	0.00193799	0.00487856	Promoter	9	155311	155765	455	1	YIL111W	YIL111W_mRNA	-109
IX	160858	160871	14	+	1.46037	5.96873	6.66207	0.0250347	0.0434912	Promoter	9	160887	162977	2091	1	YIL108W	YIL108W_mRNA	-16
IX	165913	165943	31	-	1.04847	7.09572	19.0308	0.00105891	0.00290453	Promoter	9	163278	165761	2484	2	YIL107C	YIL107C_mRNA	-182
IX	166399	166399	1	+	-2.26672	4.90282	12.955	0.00399413	0.00904396	Promoter	9	166415	167444	1030	1	YIL106W	YIL106W_mRNA	-16
IX	171692	171732	41	+	-1.77864	5.68276	16.4319	0.00179787	0.00457243	Promoter	9	171751	173028	1278	1	YIL103W	YIL103W_mRNA	-19
IX	177268	177435	168	-	2.27308	8.68958	164.072	4.388e-08	9.88519e-07	Promoter	9	177373	177726	354	1	YIL100W	YIL100W_mRNA	0
IX	187647	187735	89	-	-1.58701	6.49301	34.5324	9.51973e-05	0.000383151	Promoter	9	186517	187632	1116	2	YIL094C	YIL094C_mRNA	-103
IX	193178	193249	72	-	-1.73152	8.79036	123.064	1.99841e-07	3.04836e-06	Promoter	9	191030	193195	2166	2	YIL091C	YIL091C_mRNA	0
IX	199426	199484	59	-	1.26196	6.70197	21.1103	0.000716942	0.0021054	Promoter	9	197931	199403	1473	2	YIL088C	YIL088C_mRNA	-81
IX	200092	200201	110	-	1.26156	7.2648	17.7553	0.00136443	0.00360833	Promoter	9	199646	200119	474	2	YIL087C	YIL087C_mRNA	0
IX	202065	202108	44	-	-1.88262	4.9801	15.3184	0.00229299	0.00563455	Promoter	9	200490	202043	1554	2	YIL085C	YIL085C_mRNA	-65
IX	212432	212482	51	+	-2.06044	7.5508	67.7601	4.12987e-06	3.21022e-05	Promoter	9	212499	214703	2205	1	YIL078W	YIL078W_mRNA	-17
IX	232376	232459	84	-	-2.89127	8.79089	131.061	1.43772e-07	2.36919e-06	Promoter	9	231553	232369	817	2	YIL069C	YIL069C_mRNA	-90
IX	241756	241866	111	-	1.33328	8.24409	41.7818	4.07439e-05	0.000192081	Promoter	9	241308	241775	468	2	YIL065C	YIL065C_mRNA	0
IX	248369	248502	134	-	6.66251	9.48318	902.351	3.76784e-12	9.16715e-09	Promoter	9	247902	248396	495	2	YIL057C	YIL057C_mRNA	0
IX	255049	255109	61	+	-2.17381	8.76371	112.707	3.15653e-07	4.33889e-06	Promoter	9	255115	255867	753	1	YIL053W	YIL053W_mRNA	-6
IX	257080	257164	85	-	-1.95277	8.81199	149.554	7.17407e-08	1.42486e-06	Promoter	9	256226	257063	838	2	YIL052C	YIL052C_mRNA	-101
IX	261467	261586	120	+	8.07249	5.94624	72.1547	1.09623e-05	6.86519e-05	Promoter	9	261437	264892	3456	1	YIL048W	YIL048W_mRNA	30
IX	309190	309228	39	-	8.04252	5.89807	108.976	1.89864e-06	1.73988e-05	Promoter	9	308602	309171	570	2	YIL024C	YIL024C_mRNA	-57
IX	312814	312875	62	+	-1.01055	6.94434	26.0408	0.000313098	0.00104999	Promoter	9	312905	313861	957	1	YIL021W	YIL021W_mRNA	-30
IX	314840	314919	80	-	-1.67282	6.84506	53.0062	1.35048e-05	8.05323e-05	Promoter	9	314035	314820	786	2	YIL020C	YIL020C_mRNA	-99
IX	315061	315095	35	+	-2.51403	6.49563	61.9529	6.39435e-06	4.56231e-05	Promoter	9	315093	316133	1041	1	YIL019W	YIL019W_mRNA	0
IX	316703	316774	72	+	-3.15334	7.49823	105.435	4.45491e-07	5.78069e-06	Promoter	9	316768	317932	1165	1	YIL018W	YIL018W_mRNA	0
IX	322285	322324	40	+	-3.57821	4.93958	23.0199	0.000512557	0.00158658	Promoter	9	322342	324105	1764	1	YIL015W	YIL015W_mRNA	-18
IX	325566	325614	49	-	2.31102	5.25471	13.9116	0.00316891	0.00741341	Promoter	9	325212	325526	315	2	YIL014C-A	YIL014C-A_mRNA	-88
IX	344034	344064	31	+	2.25165	5.18697	13.8056	0.00324968	0.00756601	Promoter	9	344062	345183	1122	1	YIL006W	YIL006W_mRNA	0
IX	345631	345716	86	+	1.78141	6.76813	43.3052	3.46097e-05	0.00016858	Promoter	9	345692	347797	2106	1	YIL005W	YIL005W_mRNA	0
IX	37346	37350	5	+	-1.46438	5.7163	16.4039	0.00180866	0.00458859	Promoter	9	37385	38983	1599	1	YIL162W	YIL162W_mRNA	-35
IX	374447	374519	73	+	-1.82699	6.49458	37.3376	6.75072e-05	0.000287896	Promoter	9	374525	374860	336	1	YIR009W	YIR009W_mRNA	-6
IX	381049	381088	40	+	1.0223	6.78036	12.7557	0.00419662	0.00942787	Promoter	9	381086	381814	729	1	YIR014W	YIR014W_mRNA	0
IX	381924	381950	27	+	-2.99378	5.92714	53.1033	1.33882e-05	8.01319e-05	Promoter	9	381948	382382	435	1	YIR015W	YIR015W_mRNA	0
IX	382578	382607	30	+	1.68338	5.98389	14.8932	0.00252352	0.00611831	Promoter	9	382628	383425	798	1	YIR016W	YIR016W_mRNA	-21
IX	405974	406031	58	-	-2.25455	6.98498	70.0945	3.496e-06	2.83526e-05	Promoter	9	404873	405967	1095	2	YIR026C	YIR026C_mRNA	-64
IX	412778	412810	33	-	-2.96728	4.6969	14.3573	0.0028543	0.00680168	Promoter	9	412036	412770	735	2	YIR030C	YIR030C_mRNA	-40
IX	41445	41478	34	-	9.40021	7.12957	258.366	4.14807e-08	9.47629e-07	Promoter	9	40191	41444	1254	2	YIL160C	YIL160C_mRNA	-34
IX	421810	421859	50	-	-3.01191	6.15653	78.0221	2.05412e-06	1.83844e-05	Promoter	9	421026	421790	765	2	YIR035C	YIR035C_mRNA	-69
IX	422859	422931	73	-	2.09825	7.36441	77.2228	2.16246e-06	1.90281e-05	Promoter	9	422074	422865	792	2	YIR036C	YIR036C_mRNA	0
IX	423049	423128	80	+	3.09666	6.35125	31.3114	0.000145241	0.000545326	Promoter	9	423128	423619	492	1	YIR037W	YIR037W_mRNA	0
IX	424513	424571	59	-	1.21765	8.01342	64.8749	5.11008e-06	3.77898e-05	Promoter	9	423809	424513	705	2	YIR038C	YIR038C_mRNA	0
IX	46131	46140	10	+	3.28742	4.86529	18.5789	0.00115688	0.00312918	Promoter	9	46201	46815	615	1	YIL158W	YIL158W_mRNA	-61
IX	46185	46216	32	+	-2.39503	6.80749	74.7267	2.54684e-06	2.1742e-05	Promoter	9	46201	46815	615	1	YIL158W	YIL158W_mRNA	0
IX	47513	47586	74	-	1.10114	7.61133	37.2485	6.82262e-05	0.000289947	Promoter	9	46949	47542	594	2	YIL157C	YIL157C_mRNA	0
IX	53724	53809	86	-	3.12011	7.39382	125.896	1.77456e-07	2.78549e-06	Promoter	9	51759	53708	1950	2	YIL155C	YIL155C_mRNA	-101
IX	68643	68708	66	+	-1.6979	9.88664	143.645	8.87694e-08	1.66777e-06	Promoter	9	68708	69528	821	1	YIL148W	YIL148W_mRNA	0
IX	77284	77358	75	-	-2.43723	7.1073	90.5641	9.69527e-07	1.03915e-05	Promoter	9	76354	77283	930	2	YIL145C	YIL145C_mRNA	-75
IX	93510	94180	671	+	2.20997	11.1581	173.808	3.22727e-08	7.85195e-07	Promoter	9	93619	94800	1182	1	YIL136W	YIL136W_mRNA	0
IX	99392	99490	99	-	-2.84473	9.42818	441.381	2.01516e-10	5.33716e-08	Promoter	9	98527	99416	890	2	YIL133C	YIL133C_mRNA	0
Mito	6546	6715	170	+	4.03126	6.43772	18.1759	0.00125339	0.00335294	Promoter	17	6546	8194	1649	1	Q0020	Q0020_rRNA	0
V	101753	101890	138	+	-1.57696	7.57746	45.5436	2.74575e-05	0.000141107	Promoter	5	101943	102323	381	1	YEL026W	YEL026W_mRNA	-53
V	118034	118052	19	-	1.40646	6.51001	21.0949	0.000718955	0.00211003	Promoter	5	117667	118035	369	2	RPR1	RPR1_ncRNA	0
V	122937	122977	41	-	-2.04636	7.58069	86.7547	1.20531e-06	1.22957e-05	Promoter	5	122798	122929	132	2	YEL017C-A	YEL017C-A_mRNA	-48
V	126401	126421	21	-	-2.1749	5.23523	25.3256	0.000350492	0.00114689	Promoter	5	124737	126218	1482	2	YEL016C	YEL016C_mRNA	-203
V	131627	131765	139	+	1.3058	8.64894	39.2841	5.38121e-05	0.000241336	Promoter	5	131772	132551	780	1	YEL012W	YEL012W_mRNA	-7
V	141629	141652	24	+	1.11082	6.81864	12.2573	0.00475886	0.0104924	Promoter	5	141892	143892	2001	1	YEL007W	YEL007W_mRNA	-240
V	141711	141807	97	+	3.05911	5.26639	15.6381	0.00213593	0.00530007	Promoter	5	141892	143892	2001	1	YEL007W	YEL007W_mRNA	-85
V	153462	153482	21	+	-1.51243	5.82444	20.7301	0.000768382	0.00223088	Promoter	5	153520	155808	2289	1	YER001W	YER001W_mRNA	-38
V	156739	156796	58	+	-1.19284	9.30182	63.5852	5.63544e-06	4.10509e-05	Promoter	5	156803	157498	696	1	YER002W	YER002W_mRNA	-7
V	159293	159410	118	+	1.93824	6.32881	43.9918	3.22049e-05	0.000159257	Promoter	5	159580	160275	696	1	YER004W	YER004W_mRNA	-170
V	159548	159582	35	+	1.59447	7.53452	81.9549	1.60562e-06	1.5083e-05	Promoter	5	159580	160275	696	1	YER004W	YER004W_mRNA	0
V	162658	162706	49	+	-1.90957	8.99379	98.3204	6.37733e-07	7.38859e-06	Promoter	5	162723	164285	1563	1	YER006W	YER006W_mRNA	-17
V	16288	16342	55	+	-3.61744	5.81887	34.3045	9.79852e-05	0.000392102	Promoter	5	16355	17845	1491	1	YEL071W	YEL071W_mRNA	-13
V	167586	167586	1	-	-1.12923	5.31008	8.47132	0.0137978	0.0260638	Promoter	5	167427	167586	160	2	snR14	snR14_snRNA	0
V	172027	172106	80	+	-1.25999	7.58773	46.768	2.42866e-05	0.00012733	Promoter	5	172115	172492	378	1	YER009W	YER009W_mRNA	-9
V	173306	173367	62	-	1.39186	5.36351	7.25735	0.0204215	0.0366413	Promoter	5	172634	173338	705	2	YER010C	YER010C_mRNA	0
V	175182	175205	24	+	-2.9407	5.67033	27.8277	0.000238448	0.000831748	Promoter	5	175248	176012	765	1	YER011W	YER011W_mRNA	-43
V	182546	182584	39	+	1.00095	6.57114	14.7328	0.00261752	0.0063085	Promoter	5	182600	184219	1620	1	YER014W	YER014W_mRNA	-16
V	184465	184547	83	+	7.87342	5.76177	87.5308	4.85882e-06	3.64861e-05	Promoter	5	184541	186775	2235	1	YER015W	YER015W_mRNA	0
V	192842	192875	34	+	-1.87224	5.85275	28.384	0.000219641	0.000778989	Promoter	5	192797	194230	1434	1	YER019W	YER019W_mRNA	45
V	196874	196965	92	+	1.32668	8.11695	68.9025	3.80412e-06	3.00501e-05	Promoter	5	196948	198519	1572	1	YER021W	YER021W_mRNA	0
V	202160	202194	35	+	4.48403	6.67047	89.6034	1.02344e-06	1.08262e-05	Promoter	5	202192	204963	2772	1	YER024W	YER024W_mRNA	0
V	211902	211988	87	-	-8.37781	5.89473	116.863	1.40253e-06	1.35143e-05	Promoter	5	210692	211876	1185	2	YER028C	YER028C_mRNA	-112
V	225810	225889	80	+	1.26804	5.79962	9.08511	0.0114375	0.0222303	Promoter	5	225889	226854	966	1	YER037W	YER037W_mRNA	0
V	237139	237203	65	-	-1.8877	7.3777	51.5234	1.54424e-05	8.96691e-05	Promoter	5	235770	237119	1350	2	YER043C	YER043C_mRNA	-84
V	251697	251719	23	+	-2.3094	5.85615	37.2957	6.78445e-05	0.000288829	Promoter	5	251728	253662	1935	1	YER049W	YER049W_mRNA	-9
V	254625	254648	24	+	1.25096	5.40383	8.58451	0.0133219	0.0253022	Promoter	5	254656	256134	1479	1	YER051W	YER051W_mRNA	-8
V	258007	258098	92	-	-5.17126	5.68963	67.1005	4.33286e-06	3.30984e-05	Promoter	5	256375	257958	1584	2	YER052C	YER052C_mRNA	-140
V	265761	265918	158	-	-6.57534	7.94094	226.397	7.79316e-09	3.00964e-07	Promoter	5	264892	265785	894	2	YER055C	YER055C_mRNA	0
V	268178	268204	27	-	-2.5443	6.73158	102.157	5.2409e-07	6.45626e-06	Promoter	5	266512	268113	1602	2	YER056C	YER056C_mRNA	-91
V	270148	270239	92	-	-2.22692	9.31466	251.234	4.43217e-09	2.17848e-07	Promoter	5	269423	270185	763	2	YER056C-A	YER056C-A_mRNA	0
V	271701	271774	74	+	1.7017	6.93327	28.5552	0.000214208	0.000764176	Promoter	5	271768	272091	324	1	YER058W	YER058W_mRNA	0
V	27568	27669	102	+	1.13263	8.08345	55.3382	1.1006e-05	6.88368e-05	Promoter	5	27657	29543	1887	1	YEL065W	YEL065W_mRNA	0
V	286922	286978	57	-	2.41066	8.53032	208.42	1.21823e-08	4.20418e-07	Promoter	5	285241	286914	1674	2	YER065C	YER065C_mRNA	-64
V	298872	298917	46	+	-4.41044	6.97915	106.228	4.28621e-07	5.62176e-06	Promoter	5	298950	301616	2667	1	YER070W	YER070W_mRNA	-33
V	303944	303981	38	+	-2.37395	7.25865	124.123	1.911e-07	2.93907e-06	Promoter	5	304030	305592	1563	1	YER073W	YER073W_mRNA	-49
V	306267	306358	92	+	-2.24449	8.18112	119.222	2.35764e-07	3.47645e-06	Promoter	5	306323	307196	874	1	YER074W	YER074W_mRNA	0
V	328368	328463	96	+	-1.55557	6.44168	33.0491	0.000115187	0.000446836	Promoter	5	328477	330207	1731	1	YER086W	YER086W_mRNA	-14
V	337856	337902	47	+	-1.41563	5.67189	11.6071	0.00563218	0.0121427	Promoter	5	337949	339472	1524	1	YER090W	YER090W_mRNA	-47
V	349382	349456	75	-	1.03226	7.63462	21.8137	0.000632084	0.0018881	Promoter	5	348729	349346	618	2	YER094C	YER094C_mRNA	-110
V	364515	364621	107	+	1.23882	8.61287	38.2182	6.08565e-05	0.000265497	Promoter	5	364589	366517	1929	1	YER103W	YER103W_mRNA	0
V	382215	382244	30	-	-1.86932	5.77057	27.8213	0.000238673	0.000831937	Promoter	5	378762	382103	3342	2	YER110C	YER110C_mRNA	-141
V	396205	396287	83	-	1.31947	7.0701	33.722	0.00010556	0.000417947	Promoter	5	395348	396172	825	2	YER116C	YER116C_mRNA	-115
V	396718	396788	71	+	-2.78851	8.67892	163.069	4.5336e-08	9.96221e-07	Promoter	5	396769	397653	885	1	YER117W	YER117W_mRNA	0
V	402299	402376	78	-	4.14133	5.53776	33.8813	0.000103423	0.000409818	Promoter	5	402375	402719	345	1	YER121W	YER121W_mRNA	0
V	402304	402510	207	+	2.78878	8.5904	175.729	3.04326e-08	7.58814e-07	Promoter	5	402375	402719	345	1	YER121W	YER121W_mRNA	0
V	404359	404393	35	-	-1.02541	6.20757	9.11833	0.011324	0.0220411	Promoter	5	402871	404352	1482	2	YER122C	YER122C_mRNA	-41
V	414188	414285	98	-	-1.41383	8.62469	84.3015	1.39305e-06	1.34732e-05	Promoter	5	413394	414179	786	2	YER126C	YER126C_mRNA	-106
V	414442	414477	36	+	-2.33095	5.25711	27.8435	0.000237889	0.000830394	Promoter	5	414481	415554	1074	1	YER127W	YER127W_mRNA	-4
V	41654	42024	371	-	1.86235	10.3815	189.381	2.03896e-08	5.87077e-07	Promoter	5	40046	41953	1908	2	YEL060C	YEL060C_mRNA	0
V	422486	422557	72	-	-1.73412	6.47893	35.6112	8.32022e-05	0.000342523	Promoter	5	421115	422446	1332	2	YER130C	YER130C_mRNA	-111
V	42590	42701	112	-	1.47111	7.25399	38.3962	5.96083e-05	0.000261545	Promoter	5	42400	42624	225	2	YEL059C-A	YEL059C-A_mRNA	0
V	437779	437858	80	-	-1.20628	6.79507	28.3426	0.000220977	0.000782017	Promoter	5	437267	437803	537	2	YER134C	YER134C_mRNA	0
V	439471	439610	140	+	1.38182	7.93079	35.9278	8.0026e-05	0.000331128	Promoter	5	439616	440971	1356	1	YER136W	YER136W_mRNA	-6
V	441829	441896	68	-	-1.61382	6.56867	19.2788	0.00100931	0.00279687	Promoter	5	441373	441819	447	2	YER137C	YER137C_mRNA	-77
V	441986	442328	343	+	1.81398	9.45223	47.6836	2.2195e-05	0.000118944	Promoter	5	441987	442508	522	1	SCR1	SCR1_ncRNA	0
V	449539	449539	1	+	-3.45196	5.4408	30.4391	0.000163773	0.000605564	Promoter	5	449474	449578	105	1	YER138W-A	YER138W-A_mRNA	65
V	451336	451371	36	-	1.0674	5.77478	8.35589	0.0143042	0.0268951	Promoter	5	450563	451243	681	2	YER139C	YER139C_mRNA	-128
V	456019	456129	111	-	2.89289	7.43498	134.701	1.24523e-07	2.15302e-06	Promoter	5	455146	456036	891	2	YER142C	YER142C_mRNA	0
V	456249	456315	67	+	1.16757	8.43366	59.2869	7.90924e-06	5.42062e-05	Promoter	5	456319	457605	1287	1	YER143W	YER143W_mRNA	-4
V	45798	45833	36	-	7.89772	5.78967	72.8738	1.05178e-05	6.64993e-05	Promoter	5	45020	45721	702	2	YEL057C	YEL057C_mRNA	-112
V	484343	484372	30	-	-2.61402	5.2389	18.1808	0.00125216	0.0033515	Promoter	5	483325	484341	1017	2	YER156C	YER156C_mRNA	-31
V	502888	502941	54	-	1.48438	7.37871	60.0551	7.43306e-06	5.1355e-05	Promoter	5	500630	502894	2265	2	YER162C	YER162C_mRNA	0
V	505177	505222	46	+	2.69232	5.16648	11.7953	0.00536119	0.0116358	Promoter	5	505392	509798	4407	1	YER164W	YER164W_mRNA	-170
V	51537	51634	98	-	-1.92441	7.74764	102.708	5.09787e-07	6.33715e-06	Promoter	5	48471	51539	3069	2	YEL055C	YEL055C_mRNA	0
V	522693	522721	29	-	-3.48309	4.68128	16.7846	0.00166818	0.00428808	Promoter	5	521029	522669	1641	2	YER168C	YER168C_mRNA	-52
V	53203	53304	102	-	-2.79068	8.34498	281.722	2.37555e-09	1.50123e-07	Promoter	5	52721	53218	498	2	YEL054C	YEL054C_mRNA	0
V	551140	551170	31	-	1.60645	5.49805	10.8605	0.0068804	0.0144522	Promoter	5	550865	551122	258	2	YER180C-A	YER180C-A_mRNA	-48
V	68884	68910	27	-	-1.41421	6.63867	26.6407	0.000285315	0.000972228	Promoter	5	67629	68792	1164	2	YEL046C	YEL046C_mRNA	-118
V	69737	69793	57	+	-1.19801	6.37517	16.5459	0.00175468	0.00447969	Promoter	5	69757	70257	501	1	YEL044W	YEL044W_mRNA	0
V	70419	70474	56	+	1.28366	5.74754	11.2166	0.00624814	0.0132766	Promoter	5	70478	73348	2871	1	YEL043W	YEL043W_mRNA	-4
V	73560	73607	48	+	-1.42176	5.95413	13.4903	0.00350473	0.00807482	Promoter	5	73771	75327	1557	1	YEL042W	YEL042W_mRNA	-164
V	75659	75733	75	+	7.61091	5.51795	70.8806	1.18074e-05	7.25442e-05	Promoter	5	75944	77431	1488	1	YEL041W	YEL041W_mRNA	-211
V	75801	75893	93	+	1.39132	5.39776	6.91054	0.0229717	0.0403882	Promoter	5	75944	77431	1488	1	YEL041W	YEL041W_mRNA	-51
V	78021	78049	29	+	-7.63454	5.2067	70.2925	1.22241e-05	7.44462e-05	Promoter	5	78053	79456	1404	1	YEL040W	YEL040W_mRNA	-4
V	80041	80176	136	-	-2.45178	7.74177	148.055	7.56646e-08	1.47274e-06	Promoter	5	79636	79977	342	2	YEL039C	YEL039C_mRNA	-199
V	86853	86911	59	+	-1.26441	5.07297	8.58114	0.0133358	0.0253188	Promoter	5	86937	89852	2916	1	YEL032W	YEL032W_mRNA	-26
VI	103135	103230	96	-	1.39068	8.99692	46.7075	2.44328e-05	0.000127839	Promoter	6	101628	103127	1500	2	YFL018C	YFL018C_mRNA	-103
VI	106237	106326	90	-	2.42999	6.46135	52.9846	1.3531e-05	8.05897e-05	Promoter	6	104701	106236	1536	2	YFL016C	YFL016C_mRNA	-90
VI	107123	107526	404	+	5.04952	10.8851	554.193	5.70873e-11	3.38119e-08	Promoter	6	107256	107585	330	1	YFL014W	YFL014W_mRNA	0
VI	11251	11464	214	+	3.57882	7.13559	85.0095	1.33554e-06	1.31553e-05	Promoter	6	11363	12259	897	1	YFL059W	YFL059W_mRNA	0
VI	146915	146993	79	-	-2.705	5.66544	15.1483	0.00238208	0.00581889	Promoter	6	145114	146934	1821	2	YFL002C	YFL002C_mRNA	0
VI	153331	153404	74	+	1.34453	7.91461	61.125	6.82496e-06	4.80611e-05	Promoter	6	153393	154313	921	1	YFR004W	YFR004W_mRNA	0
VI	15492	15504	13	-	7.98411	5.82853	70.932	1.17718e-05	7.24168e-05	Promoter	6	14305	15431	1127	2	YFL056C	YFL056C	-73
VI	156085	156310	226	+	1.59297	8.59787	117.616	2.52996e-07	3.62082e-06	Promoter	6	156145	157752	1608	1	YFR006W	YFR006W_mRNA	0
VI	160458	160541	84	+	1.09826	6.29094	7.30476	0.0200998	0.0362242	Promoter	6	160535	161200	666	1	YFR008W	YFR008W_mRNA	0
VI	173871	173973	103	-	1.35464	8.0737	41.4471	4.22583e-05	0.000197151	Promoter	6	172537	173877	1341	2	YFR014C	YFR014C_mRNA	0
VI	196753	196830	78	+	-3.83511	5.55482	25.4389	0.000344233	0.00112949	Promoter	6	196833	199034	2202	1	YFR022W	YFR022W_mRNA	-3
VI	210104	210145	42	-	-1.57797	6.63173	41.861	4.0395e-05	0.000191022	Promoter	6	208413	210068	1656	2	YFR028C	YFR028C_mRNA	-77
VI	221412	221528	117	-	-3.23278	7.74963	203.746	1.37654e-08	4.47539e-07	Promoter	6	220507	221418	912	2	YFR031C-A	YFR031C-A_mRNA	0
VI	239835	239858	24	-	1.19286	5.43889	9.25107	0.0108839	0.0213811	Promoter	6	239114	239827	714	2	YFR043C	YFR043C_mRNA	-31
VI	245180	245206	27	-	1.33281	6.58028	20.9868	0.000733192	0.00214148	Promoter	6	244279	245166	888	2	YFR047C	YFR047C_mRNA	-40
VI	248337	248517	181	+	1.79519	8.40373	133.474	1.30652e-07	2.23072e-06	Promoter	6	248523	248894	372	1	YFR049W	YFR049W_mRNA	-6
VI	264132	264198	67	+	-9.14666	6.63573	235.495	6.29742e-08	1.28014e-06	Promoter	6	264204	265226	1023	1	YFR055W	YFR055W_mRNA	-6
VI	45542	45641	100	-	1.67762	7.92227	98.4274	6.34191e-07	7.38272e-06	Promoter	6	44655	45560	906	2	YFL044C	YFL044C_mRNA	0
VI	64021	64064	44	-	-1.03583	6.96021	14.3433	0.00286356	0.00682041	Promoter	6	63016	63993	978	2	YFL034C-B	YFL034C-B_mRNA	-71
VI	64939	64991	53	-	-2.85132	7.43671	190.211	1.99166e-08	5.80325e-07	Promoter	6	64243	64932	690	2	YFL034C-A	YFL034C-A_mRNA	-59
VI	82524	82565	42	+	-3.42302	7.40094	183.327	2.42674e-08	6.48821e-07	Promoter	6	82580	83875	1296	1	YFL026W	YFL026W_mRNA	-15
VII	1000860	1000890	31	+	1.04151	8.39961	39.0023	5.55761e-05	0.000247877	Promoter	7	1000927	1002240	1314	1	YGR254W	YGR254W_mRNA	-37
VII	1004528	1004626	99	+	6.88305	7.99189	261.455	3.56817e-09	1.82765e-07	Promoter	7	1004624	1006102	1479	1	YGR256W	YGR256W_mRNA	0
VII	1010760	1010840	81	-	2.24379	7.32957	54.4951	1.18409e-05	7.26579e-05	Promoter	7	1007671	1010766	3096	2	YGR258C	YGR258C_mRNA	0
VII	1016758	1016806	49	-	-1.21788	5.50091	10.192	0.00828482	0.0169244	Promoter	7	1014321	1016750	2430	2	YGR261C	YGR261C_mRNA	-56
VII	1021860	1021904	45	-	-3.38746	5.89083	69.5668	3.62865e-06	2.90392e-05	Promoter	7	1019598	1021853	2256	2	YGR264C	YGR264C_mRNA	-51
VII	1026614	1026698	85	-	1.30979	6.88928	10.7133	0.00716367	0.01498	Promoter	7	1026057	1026653	597	2	YGR268C	YGR268C_mRNA	0
VII	1038502	1038567	66	-	-1.75801	7.63314	94.3658	7.86516e-07	8.81841e-06	Promoter	7	1037800	1038501	702	2	YGR271C-A	YGR271C-A_mRNA	-66
VII	1043095	1043116	22	-	1.18675	5.50793	9.78324	0.00931154	0.0187044	Promoter	7	1039895	1043095	3201	2	YGR274C	YGR274C_mRNA	0
VII	1051717	1051786	70	-	-3.78499	9.17618	486.176	1.1803e-10	3.82888e-08	Promoter	7	1050910	1051725	816	2	YGR280C	YGR280C_mRNA	0
VII	1060048	1060086	39	-	-1.3377	6.70044	28.6128	0.000212414	0.000758331	Promoter	7	1059015	1060040	1026	2	YGR283C	YGR283C_mRNA	-46
VII	1061543	1061670	128	-	1.71658	7.02505	36.5521	7.41721e-05	0.000310871	Promoter	7	1060658	1061590	933	2	YGR284C	YGR284C_mRNA	0
VII	1063120	1063185	66	-	-1.95608	7.88114	102.619	5.12071e-07	6.3403e-06	Promoter	7	1061852	1063153	1302	2	YGR285C	YGR285C_mRNA	0
VII	107932	108150	219	+	10.834	8.47271	587.857	9.79054e-10	1.03567e-07	Promoter	7	108158	110404	2247	1	YGL205W	YGL205W_mRNA	-8
VII	115926	116037	112	+	-1.88829	7.05004	70.363	3.43069e-06	2.80402e-05	Promoter	7	116059	117561	1503	1	YGL202W	YGL202W_mRNA	-22
VII	124647	124719	73	+	7.09422	5.10542	52.7405	3.96153e-05	0.00018825	Promoter	7	124698	129161	4464	1	YGL197W	YGL197W_mRNA	0
VII	129802	129822	21	+	-1.67761	5.94285	22.6954	0.000541876	0.00166192	Promoter	7	129883	131169	1287	1	YGL196W	YGL196W_mRNA	-61
VII	131482	131512	31	+	-1.26258	6.48339	21.2349	0.00070098	0.00206725	Promoter	7	131525	139543	8019	1	YGL195W	YGL195W_mRNA	-13
VII	144678	144800	123	+	1.94138	9.017	174.473	3.16212e-08	7.75374e-07	Promoter	7	144808	145197	390	1	YGL191W	YGL191W_mRNA	-8
VII	148910	149042	133	-	-2.27329	10.0097	233.292	6.62501e-09	2.68644e-07	Promoter	7	148824	148964	141	2	YGL188C-A	YGL188C-A_mRNA	0
VII	156043	156140	98	-	1.45304	5.80322	11.9874	0.00510041	0.0111494	Promoter	7	154615	156012	1398	2	YGL184C	YGL184C_mRNA	-128
VII	159869	159899	31	+	1.74444	6.07364	27.1154	0.000265373	0.000912582	Promoter	7	160065	162758	2694	1	YGL180W	YGL180W_mRNA	-166
VII	164999	165177	179	-	-1.00912	6.69479	16.1287	0.00191897	0.00483819	Promoter	7	163409	165091	1683	2	YGL179C	YGL179C_mRNA	0
VII	182318	182387	70	+	-2.19124	7.58923	114.968	2.84756e-07	3.98937e-06	Promoter	7	182390	184084	1695	1	YGL171W	YGL171W_mRNA	-3
VII	196514	196561	48	-	2.19117	5.53312	25.8648	0.000321843	0.00107193	Promoter	7	193707	196403	2697	2	YGL163C	YGL163C_mRNA	-158
VII	198092	198140	49	+	-7.04243	4.71485	60.8883	2.21162e-05	0.000118783	Promoter	7	198138	199037	900	1	YGL162W	YGL162W_mRNA	0
VII	208898	208965	68	+	-3.96402	6.26268	99.3056	6.05991e-07	7.20101e-06	Promoter	7	209006	210049	1044	1	YGL157W	YGL157W_mRNA	-41
VII	210305	210421	117	+	9.48054	7.20155	317.372	1.63545e-08	5.03676e-07	Promoter	7	210416	213667	3252	1	YGL156W	YGL156W_mRNA	0
VII	226293	226399	107	+	-1.23911	8.40322	68.5333	3.90597e-06	3.07997e-05	Promoter	7	226399	227529	1131	1	YGL148W	YGL148W_mRNA	0
VII	228254	228379	126	-	-5.28429	9.12102	907.65	3.64642e-12	9.16715e-09	Promoter	7	227754	228329	576	2	YGL147C	YGL147C_mRNA	0
VII	228437	228490	54	-	-4.90826	5.48829	46.1928	2.57192e-05	0.000133707	Promoter	7	227754	228329	576	2	YGL147C	YGL147C_mRNA	-161
VII	229624	229727	104	-	7.85844	5.76051	60.0528	2.34022e-05	0.000124065	Promoter	7	228751	229686	936	2	YGL146C	YGL146C_mRNA	0
VII	238286	238345	60	+	1.39097	6.27135	16.3098	0.00184551	0.00466991	Promoter	7	238353	241085	2733	1	YGL141W	YGL141W_mRNA	-8
VII	23879	23919	41	+	-2.73588	7.41302	101.181	5.50557e-07	6.67749e-06	Promoter	7	23935	25395	1461	1	YGL253W	YGL253W_mRNA	-16
VII	254518	254605	88	+	-2.70243	7.86851	216.606	9.89635e-09	3.56708e-07	Promoter	7	254641	255294	654	1	YGL135W	YGL135W_mRNA	-36
VII	27491	27544	54	-	1.21484	7.16098	24.9097	0.000374658	0.00121377	Promoter	7	25718	27484	1767	2	YGL252C	YGL252C_mRNA	-60
VII	277486	277612	127	+	-2.56751	8.48572	203.2	1.39654e-08	4.50037e-07	Promoter	7	277617	278381	765	1	YGL123W	YGL123W_mRNA	-5
VII	281107	281292	186	-	4.70392	8.84772	287.651	2.12025e-09	1.4133e-07	Promoter	7	280777	281157	381	2	YGL121C	YGL121C_mRNA	0
VII	283955	284011	57	-	-2.38475	7.76909	161.821	4.72257e-08	1.02961e-06	Promoter	7	281634	283937	2304	2	YGL120C	YGL120C_mRNA	-74
VII	299922	299957	36	+	-1.66371	6.33904	26.3106	0.000300225	0.0010131	Promoter	7	299978	301369	1392	1	YGL111W	YGL111W_mRNA	-21
VII	307367	307452	86	+	-1.07442	9.15989	45.4367	2.77568e-05	0.000141726	Promoter	7	307437	308567	1131	1	YGL105W	YGL105W_mRNA	0
VII	310173	310225	53	-	2.47785	5.523	16.1548	0.00190814	0.00481339	Promoter	7	308713	310173	1461	2	YGL104C	YGL104C_mRNA	0
VII	310902	311007	106	+	-1.98823	9.04808	205.162	1.32615e-08	4.41991e-07	Promoter	7	310967	311927	961	1	YGL103W	YGL103W_mRNA	0
VII	312115	312183	69	+	-1.48382	6.94085	34.2053	9.92288e-05	0.000395776	Promoter	7	312193	312840	648	1	YGL101W	YGL101W_mRNA	-10
VII	31855	31916	62	+	1.28098	6.87903	15.839	0.00204376	0.00509734	Promoter	7	31910	32635	726	1	YGL250W	YGL250W_mRNA	0
VII	321716	321764	49	+	-1.46893	5.45958	15.7856	0.00206779	0.00514937	Promoter	7	321782	323230	1449	1	YGL097W	YGL097W_mRNA	-18
VII	325284	325296	13	+	4.01266	5.44124	30.5685	0.000160854	0.000596583	Promoter	7	325331	326161	831	1	YGL096W	YGL096W_mRNA	-35
VII	343063	343103	41	-	3.74785	5.23115	24.9192	0.000374086	0.00121273	Promoter	7	342056	343042	987	2	YGL091C	YGL091C_mRNA	-61
VII	343238	343319	82	+	1.16209	8.09052	10.6747	0.00724033	0.0151208	Promoter	7	343319	344584	1266	1	YGL090W	YGL090W_mRNA	0
VII	35661	35810	150	+	1.10606	8.24398	19.3671	0.000992316	0.00276078	Promoter	7	35653	36762	1110	1	YGL248W	YGL248W_mRNA	8
VII	358531	358671	141	+	1.68664	9.12137	121.124	2.17107e-07	3.28087e-06	Promoter	7	358636	359028	393	1	YGL080W	YGL080W_mRNA	0
VII	361888	361985	98	-	-1.13887	7.86261	22.1491	0.000595827	0.00179969	Promoter	7	360288	361859	1572	2	YGL078C	YGL078C_mRNA	-126
VII	365981	366139	159	-	-2.60771	8.43744	294.895	1.85089e-09	1.38561e-07	Promoter	7	364335	365996	1662	2	YGL076C	YGL076C_mRNA	0
VII	368648	368735	88	+	1.55502	6.3417	14.088	0.0030397	0.00716975	Promoter	7	368753	371254	2502	1	YGL073W	YGL073W_mRNA	-18
VII	375987	376085	99	+	-1.65477	8.70807	56.9645	9.58315e-06	6.25928e-05	Promoter	7	376101	377255	1155	1	YGL067W	YGL067W_mRNA	-16
VII	377611	377626	16	+	1.53925	5.35686	10.9427	0.00672795	0.0141663	Promoter	7	377609	379582	1974	1	YGL066W	YGL066W_mRNA	2
VII	385095	385173	79	+	1.06125	8.16007	30.7468	0.000156935	0.000583075	Promoter	7	385196	388732	3537	1	YGL062W	YGL062W_mRNA	-23
VII	389705	389809	105	-	-1.04664	7.61495	33.6285	0.00010684	0.000421298	Promoter	7	388968	389711	744	2	YGL061C	YGL061C_mRNA	0
VII	38977	39013	37	+	-1.16402	6.56518	12.875	0.00407395	0.00920327	Promoter	7	39023	41149	2127	1	YGL245W	YGL245W_mRNA	-10
VII	411284	411339	56	-	1.02296	8.20787	43.7256	3.31132e-05	0.000163251	Promoter	7	410069	411286	1218	2	YGL048C	YGL048C_mRNA	0
VII	411451	411518	68	+	2.1048	6.60701	61.5636	6.59269e-06	4.66958e-05	Promoter	7	411552	412160	609	1	YGL047W	YGL047W_mRNA	-34
VII	423826	423902	77	+	-2.99563	5.76646	57.0966	9.47745e-06	6.22365e-05	Promoter	7	423961	425007	1047	1	YGL039W	YGL039W_mRNA	-59
VII	436872	437018	147	-	-1.77223	7.17818	31.4366	0.00014279	0.000537367	Promoter	7	436570	436833	264	2	YGL032C	YGL032C_mRNA	-185
VII	438945	439100	156	+	-2.32819	8.80654	132.82	1.34062e-07	2.27269e-06	Promoter	7	439091	439638	548	1	YGL030W	YGL030W_mRNA	0
VII	439932	440068	137	+	-1.36583	9.45294	64.3017	5.33611e-06	3.91637e-05	Promoter	7	440063	440425	363	1	YGL029W	YGL029W_mRNA	0
VII	448543	448579	37	-	-1.01861	6.42719	9.89976	0.0090042	0.0181501	Promoter	7	446412	448535	2124	2	YGL026C	YGL026C_mRNA	-44
VII	461597	461628	32	+	-2.93959	5.16774	22.3195	0.000578338	0.00175739	Promoter	7	461666	464911	3246	1	YGL016W	YGL016W_mRNA	-38
VII	472810	472849	40	+	-1.76085	6.67476	28.8408	0.000205493	0.000735782	Promoter	7	472855	474276	1422	1	YGL012W	YGL012W_mRNA	-6
VII	475476	475499	24	+	2.025	5.52332	23.4804	0.000474096	0.00148548	Promoter	7	475545	476069	525	1	YGL010W	YGL010W_mRNA	-46
VII	478688	478735	48	-	-2.02425	7.01119	71.8184	3.10076e-06	2.58361e-05	Promoter	7	476313	478652	2340	2	YGL009C	YGL009C_mRNA	-83
VII	485473	485669	197	+	1.78278	6.9911	28.1471	0.000227428	0.000799036	Promoter	7	485423	485533	111	1	YGL006W-A	YGL006W-A_mRNA	50
VII	496516	496615	100	-	-1.85923	6.53701	26.7827	0.000279168	0.000953286	Promoter	7	495453	496502	1050	2	YGL001C	YGL001C_mRNA	-113
VII	498043	498073	31	-	-1.04658	7.58865	30.9703	0.000152177	0.000567429	Promoter	7	497133	498034	902	2	YGR001C	YGR001C_mRNA	-39
VII	508345	508473	129	-	1.20329	10.6334	82.0167	1.59956e-06	1.5055e-05	Promoter	7	508110	508364	255	2	YGR008C	YGR008C_mRNA	0
VII	508543	508550	8	-	-1.80939	5.20991	19.8565	0.000904021	0.00255457	Promoter	7	508110	508364	255	2	YGR008C	YGR008C_mRNA	-186
VII	511580	511753	174	+	8.25446	6.11097	59.9348	2.35911e-05	0.000124641	Promoter	7	511545	512732	1188	1	YGR010W	YGR010W_mRNA	35
VII	525163	525195	33	+	2.00264	6.82442	56.0836	1.0325e-05	6.57609e-05	Promoter	7	525229	526644	1416	1	YGR019W	YGR019W_mRNA	-34
VII	535998	536088	91	+	1.23141	7.59764	36.3596	7.59216e-05	0.000316839	Promoter	7	536057	537379	1323	1	YGR027W-A	YGR027W-A	0
VII	542162	542205	44	+	2.37799	5.43952	11.9357	0.0051691	0.0112793	Promoter	7	542203	543291	1089	1	YGR028W	YGR028W_mRNA	0
VII	547956	548033	78	+	7.72279	5.62787	71.2932	1.15254e-05	7.15337e-05	Promoter	7	548264	553951	5688	1	YGR032W	YGR032W_mRNA	-231
VII	548082	548118	37	+	5.22865	6.46985	89.3954	1.03557e-06	1.09008e-05	Promoter	7	548264	553951	5688	1	YGR032W	YGR032W_mRNA	-146
VII	555044	555097	54	-	2.41256	5.91323	40.2669	4.81534e-05	0.000221051	Promoter	7	554248	554967	720	2	YGR033C	YGR033C_mRNA	-130
VII	555734	555805	72	+	-2.49671	8.67904	188.679	2.07995e-08	5.91873e-07	Promoter	7	555812	556672	861	1	YGR034W	YGR034W_mRNA	-7
VII	557466	557523	58	-	-3.23839	7.57532	116.795	2.62377e-07	3.73312e-06	Promoter	7	557072	557422	351	2	YGR035C	YGR035C_mRNA	-101
VII	56380	56464	85	+	-1.88918	5.93613	25.3807	0.000347431	0.00113922	Promoter	7	56482	58890	2409	1	YGL234W	YGL234W_mRNA	-18
VII	581431	581485	55	-	5.63193	8.36867	248.798	4.67315e-09	2.20857e-07	Promoter	7	580435	581436	1002	2	YGR043C	YGR043C_mRNA	0
VII	589470	589520	51	-	1.28798	7.25197	30.3741	0.000165262	0.000609216	Promoter	7	586392	589469	3078	2	YGR047C	YGR047C_mRNA	-51
VII	589730	589799	70	+	1.31347	8.21285	58.9975	8.09785e-06	5.49584e-05	Promoter	7	589826	590911	1086	1	YGR048W	YGR048W_mRNA	-27
VII	591149	591298	150	+	-1.49409	7.99294	44.3804	3.09308e-05	0.000155164	Promoter	7	591314	591877	564	1	YGR049W	YGR049W_mRNA	-16
VII	596513	596534	22	+	-1.02022	6.98893	15.7622	0.00207842	0.00517056	Promoter	7	596693	598621	1929	1	YGR054W	YGR054W_mRNA	-159
VII	615972	616087	116	-	-1.94065	6.86025	78.8766	1.94527e-06	1.76213e-05	Promoter	7	611889	615965	4077	2	YGR061C	YGR061C_mRNA	-122
VII	61999	62066	68	+	-1.10943	7.74527	35.0696	8.89861e-05	0.000362956	Promoter	7	62075	63002	928	1	YGL232W	YGL232W_mRNA	-9
VII	624780	624895	116	-	1.46419	7.29985	34.8493	9.14745e-05	0.000371238	Promoter	7	622372	624786	2415	2	YGR067C	YGR067C_mRNA	0
VII	627095	627170	76	-	-1.80733	6.72144	50.726	1.66192e-05	9.47381e-05	Promoter	7	625324	627084	1761	2	YGR068C	YGR068C_mRNA	-86
VII	640402	640428	27	-	-1.60131	7.61252	65.0675	5.03667e-06	3.75897e-05	Promoter	7	639772	640371	600	2	YGR078C	YGR078C_mRNA	-57
VII	640808	640849	42	+	-1.99521	5.26824	21.0058	0.000730664	0.00213538	Promoter	7	640720	641832	1113	1	YGR079W	YGR079W_mRNA	88
VII	643784	643844	61	-	-1.49773	6.71944	30.2416	0.000168348	0.000619186	Promoter	7	643148	643780	633	2	YGR081C	YGR081C_mRNA	-64
VII	648649	649036	388	-	-2.2663	11.0453	140.234	1.00761e-07	1.83633e-06	Promoter	7	648383	648907	525	2	YGR085C	YGR085C_mRNA	0
VII	650628	650744	117	-	1.07104	9.25977	56.6889	9.80833e-06	6.34709e-05	Promoter	7	649598	650617	1020	2	YGR086C	YGR086C_mRNA	-127
VII	654591	654615	25	+	1.17262	6.33377	12.8516	0.00409772	0.00923479	Promoter	7	654634	656322	1689	1	YGR088W	YGR088W_mRNA	-19
VII	666247	666272	26	+	-1.46066	4.8738	8.30856	0.0145182	0.0272553	Promoter	7	666341	667825	1485	1	YGR091W	YGR091W_mRNA	-69
VII	668068	668145	78	+	-1.72335	5.43306	13.513	0.00348557	0.0080421	Promoter	7	668189	669907	1719	1	YGR092W	YGR092W_mRNA	-44
VII	672131	672268	138	+	-1.29277	8.42809	40.3831	4.75316e-05	0.000218403	Promoter	7	672186	675500	3315	1	YGR094W	YGR094W_mRNA	0
VII	676384	676416	33	-	-1.39315	6.56488	32.8381	0.000118417	0.000458041	Promoter	7	675671	676342	672	2	YGR095C	YGR095C_mRNA	-74
VII	678575	678683	109	+	2.02283	6.53334	44.0743	3.19291e-05	0.000158215	Promoter	7	678695	682135	3441	1	YGR097W	YGR097W_mRNA	-12
VII	695341	695394	54	+	-2.68465	6.45226	56.7325	9.77225e-06	6.34709e-05	Promoter	7	695417	697234	1818	1	YGR103W	YGR103W_mRNA	-23
VII	699825	699846	22	-	-1.25764	6.76781	19.85	0.00090514	0.00255624	Promoter	7	698989	699786	798	2	YGR106C	YGR106C_mRNA	-60
VII	703349	703428	80	+	-1.37784	6.07669	17.1668	0.00153989	0.00400272	Promoter	7	703636	705051	1416	1	YGR108W	YGR108W_mRNA	-208
VII	713619	713708	90	+	2.63153	7.74084	148.182	7.5324e-08	1.47199e-06	Promoter	7	713709	715046	1338	1	YGR110W	YGR110W_mRNA	-1
VII	715735	715821	87	+	1.74402	6.98639	49.1349	1.92982e-05	0.000106732	Promoter	7	715828	717030	1203	1	YGR111W	YGR111W_mRNA	-7
VII	718819	718850	32	+	-1.62724	5.5177	11.3177	0.00608125	0.012973	Promoter	7	718893	719924	1032	1	YGR113W	YGR113W_mRNA	-43
VII	726928	727022	95	+	-1.65611	9.08946	91.3587	9.27454e-07	1.00962e-05	Promoter	7	726974	727730	757	1	YGR118W	YGR118W_mRNA	0
VII	729708	729760	53	-	-1.18328	5.69819	10.3356	0.00795653	0.0163649	Promoter	7	728046	729671	1626	2	YGR119C	YGR119C_mRNA	-89
VII	738212	738304	93	-	-2.19835	7.75735	76.7025	2.23662e-06	1.95745e-05	Promoter	7	736662	738203	1542	2	YGR123C	YGR123C_mRNA	-101
VII	739903	739939	37	+	-1.36312	6.78739	24.3345	0.000411399	0.00131702	Promoter	7	739944	741662	1719	1	YGR124W	YGR124W_mRNA	-5
VII	750112	750172	61	-	-2.11675	7.06143	69.6418	3.60944e-06	2.89827e-05	Promoter	7	747950	750091	2142	2	YGR128C	YGR128C_mRNA	-81
VII	756465	756551	87	-	2.00135	7.80424	96.467	7.02909e-07	8.04745e-06	Promoter	7	755589	756452	864	2	YGR132C	YGR132C_mRNA	-99
VII	770510	770569	60	+	2.08142	6.89478	79.6542	1.85209e-06	1.70364e-05	Promoter	7	770569	771972	1404	1	YGR141W	YGR141W_mRNA	0
VII	772395	772412	18	+	-2.13774	6.16878	44.2442	3.13703e-05	0.000156082	Promoter	7	772454	773686	1233	1	YGR142W	YGR142W_mRNA	-42
VII	781694	781747	54	+	-3.31185	5.93074	35.7344	8.19487e-05	0.000338508	Promoter	7	781767	783890	2124	1	YGR145W	YGR145W_mRNA	-20
VII	795509	795605	97	-	-2.3517	5.68532	26.6048	0.000286891	0.000976916	Promoter	7	794674	795492	819	2	YGR152C	YGR152C_mRNA	-113
VII	796071	796087	17	+	1.30828	6.35874	20.128	0.000859044	0.00244308	Promoter	7	796092	796745	654	1	YGR153W	YGR153W_mRNA	-5
VII	798458	798533	76	+	-1.30157	8.19884	70.217	3.46604e-06	2.82049e-05	Promoter	7	798543	800066	1524	1	YGR155W	YGR155W_mRNA	-10
VII	802178	802211	34	+	-1.73878	6.5832	39.693	5.13671e-05	0.00023273	Promoter	7	802440	805049	2610	1	YGR157W	YGR157W_mRNA	-229
VII	807673	807718	46	-	-8.58175	6.08562	113.401	1.59806e-06	1.5055e-05	Promoter	7	806412	807656	1245	2	YGR159C	YGR159C_mRNA	-62
VII	809446	809453	8	-	-1.14255	5.2787	7.02467	0.0220925	0.0391059	Promoter	7	808629	809420	792	2	YGR161C	YGR161C_mRNA	-33
VII	809490	809542	53	-	-1.7713	8.50497	110.681	3.46724e-07	4.69356e-06	Promoter	7	808629	809420	792	2	YGR161C	YGR161C_mRNA	-122
VII	810176	810279	104	+	2.4569	7.20131	73.4739	2.76983e-06	2.344e-05	Promoter	7	810227	810505	279	1	YGR161W-C	YGR161W-C_mRNA	0
VII	823976	824064	89	+	-1.61965	7.51804	42.95	3.59369e-05	0.000173309	Promoter	7	824059	826917	2859	1	YGR162W	YGR162W_mRNA	0
VII	835907	835938	32	-	-1.42142	5.96698	16.3822	0.00181706	0.00460751	Promoter	7	834689	835903	1215	2	YGR169C	YGR169C_mRNA	-35
VII	843778	843834	57	+	-1.25437	6.61104	20.3258	0.000827947	0.00236848	Promoter	7	843854	844960	1107	1	YGR173W	YGR173W_mRNA	-20
VII	853406	853458	53	-	1.1317	6.41403	17.4978	0.00143812	0.00377043	Promoter	7	851047	853215	2169	2	YGR178C	YGR178C_mRNA	-243
VII	856507	856533	27	-	-2.15674	6.9018	84.2892	1.39407e-06	1.34732e-05	Promoter	7	855264	856301	1038	2	YGR180C	YGR180C_mRNA	-232
VII	859484	859564	81	-	1.23199	8.03544	18.393	0.00120027	0.00323217	Promoter	7	859063	859476	414	2	YGR183C	YGR183C_mRNA	-88
VII	867529	867572	44	-	-1.83941	6.51848	53.8049	1.25802e-05	7.62334e-05	Promoter	7	866336	867520	1185	2	YGR185C	YGR185C_mRNA	-52
VII	875114	875165	52	-	1.14993	5.79614	6.57868	0.0257763	0.044636	Promoter	7	872044	875109	3066	2	YGR188C	YGR188C_mRNA	-56
VII	878222	878282	61	-	1.51545	6.36346	19.1018	0.00104443	0.00287454	Promoter	7	876669	878192	1524	2	YGR189C	YGR189C_mRNA	-90
VII	880175	880283	109	+	-1.119	7.87478	24.4532	0.00040348	0.00129337	Promoter	7	880420	882231	1812	1	YGR191W	YGR191W_mRNA	-137
VII	888738	888808	71	+	-1.13908	7.48164	40.6884	4.5943e-05	0.000211904	Promoter	7	888882	889622	741	1	YGR195W	YGR195W_mRNA	-74
VII	894652	894677	26	+	-1.28783	6.41976	22.6937	0.000542031	0.00166192	Promoter	7	894693	897146	2454	1	YGR198W	YGR198W_mRNA	-16
VII	903123	903321	199	-	2.94055	6.68741	50.3831	1.71573e-05	9.69659e-05	Promoter	7	902520	903197	678	2	YGR201C	YGR201C_mRNA	0
VII	905857	905907	51	+	-2.02657	7.0449	96.1901	7.13307e-07	8.0908e-06	Promoter	7	905934	908774	2841	1	YGR204W	YGR204W_mRNA	-27
VII	909073	909129	57	+	1.66407	7.12439	58.3961	8.50704e-06	5.64738e-05	Promoter	7	909213	910085	873	1	YGR205W	YGR205W_mRNA	-84
VII	911626	911686	61	-	-1.20799	7.37359	19.4472	0.000977196	0.0027309	Promoter	7	910843	911628	786	2	YGR207C	YGR207C_mRNA	0
VII	911780	911872	93	+	-1.63224	8.26884	46.335	2.53562e-05	0.000132102	Promoter	7	911883	912812	930	1	YGR208W	YGR208W_mRNA	-11
VII	913254	913318	65	-	2.04749	9.61841	143.158	9.03718e-08	1.69134e-06	Promoter	7	912913	913227	315	2	YGR209C	YGR209C_mRNA	-91
VII	914732	914900	169	-	-1.66362	8.49923	42.8987	3.61332e-05	0.000173911	Promoter	7	913503	914738	1236	2	YGR210C	YGR210C_mRNA	0
VII	915117	915218	102	+	-1.21329	7.10602	17.5995	0.00140846	0.00370842	Promoter	7	915241	916701	1461	1	YGR211W	YGR211W_mRNA	-23
VII	920493	920570	78	+	-2.59123	8.74557	188.793	2.07326e-08	5.91873e-07	Promoter	7	920575	921788	1214	1	YGR214W	YGR214W_mRNA	-5
VII	920614	920618	5	+	-6.6789	4.43147	46.8696	6.34153e-05	0.000272356	Promoter	7	920575	921788	1214	1	YGR214W	YGR214W_mRNA	39
VII	924465	924511	47	-	-1.83658	5.48837	8.198	0.0150331	0.0281351	Promoter	7	922633	924462	1830	2	YGR216C	YGR216C_mRNA	-49
VII	939914	939925	12	+	2.05037	5.51919	11.1585	0.00634642	0.0134561	Promoter	7	939923	940804	882	1	YGR222W	YGR222W_mRNA	0
VII	942220	942280	61	-	1.58018	6.34895	26.0147	0.000314374	0.00105137	Promoter	7	940869	942215	1347	2	YGR223C	YGR223C_mRNA	-65
VII	951741	951791	51	+	1.39668	6.18394	16.5504	0.00175299	0.00447779	Promoter	7	951894	952307	414	1	YGR230W	YGR230W_mRNA	-103
VII	95771	95832	62	+	-9.64273	7.12958	364.511	8.71479e-09	3.26201e-07	Promoter	7	95858	97006	1149	1	YGL209W	YGL209W_mRNA	-26
VII	962062	962132	71	-	1.54926	7.26542	38.2292	6.07789e-05	0.000265497	Promoter	7	961360	962061	702	2	YGR235C	YGR235C_mRNA	-71
VII	962791	963035	245	-	7.2907	9.81779	462.354	1.55883e-10	4.74079e-08	Promoter	7	962530	962817	288	2	YGR236C	YGR236C_mRNA	0
VII	97263	97361	99	+	1.15462	8.17748	38.6838	5.76533e-05	0.000254574	Promoter	7	97338	98585	1248	1	YGL208W	YGL208W_mRNA	0
VII	977190	977414	225	+	1.6461	9.17495	77.0791	2.18264e-06	1.9171e-05	Promoter	7	977336	977776	441	1	YGR243W	YGR243W_mRNA	0
VII	979330	979457	128	-	1.8441	10.0177	152.982	6.3629e-08	1.28472e-06	Promoter	7	978036	979319	1284	2	YGR244C	YGR244C_mRNA	-138
VII	985924	985965	42	+	2.10719	6.89451	26.8338	0.000276996	0.000947197	Promoter	7	985972	986739	768	1	YGR248W	YGR248W_mRNA	-7
VII	987932	988040	109	+	-4.60302	6.69139	60.7775	7.01585e-06	4.88848e-05	Promoter	7	988049	989419	1371	1	YGR249W	YGR249W_mRNA	-9
VIII	10213	10247	35	-	2.06375	7.16907	51.1408	1.59943e-05	9.19954e-05	Promoter	8	8351	10213	1863	2	YHL047C	YHL047C_mRNA	0
VIII	104213	104318	106	+	-2.52102	8.04244	179.658	2.70401e-08	6.97907e-07	Promoter	8	104277	105091	815	1	YHL001W	YHL001W_mRNA	0
VIII	107719	107828	110	+	1.25816	9.21983	85.1725	1.3227e-06	1.30552e-05	Promoter	8	107826	108122	297	1	YHR001W-A	YHR001W-A_mRNA	0
VIII	111303	111349	47	-	-1.96231	7.20649	68.0178	4.05361e-06	3.16611e-05	Promoter	8	110028	111317	1290	2	YHR003C	YHR003C_mRNA	0
VIII	123596	123695	100	-	2.19256	8.72676	240.098	5.66886e-09	2.39867e-07	Promoter	8	122889	123590	702	2	YHR008C	YHR008C_mRNA	-105
VIII	126436	126551	116	+	-3.23225	8.77454	134.649	1.24774e-07	2.15302e-06	Promoter	8	126521	127492	972	1	YHR010W	YHR010W_mRNA	0
VIII	131473	131505	33	-	-1.2664	6.57708	22.7502	0.000536788	0.00165213	Promoter	8	130730	131446	717	2	YHR013C	YHR013C_mRNA	-59
VIII	138490	138516	27	-	1.27387	5.91144	12.5448	0.00442441	0.00986673	Promoter	8	136881	138455	1575	2	YHR016C	YHR016C_mRNA	-61
VIII	141424	141467	44	-	-1.7131	6.76317	51.7302	1.51534e-05	8.84132e-05	Promoter	8	140011	141402	1392	2	YHR018C	YHR018C_mRNA	-65
VIII	143577	143626	50	-	-1.73836	8.5435	95.5351	7.38631e-07	8.35855e-06	Promoter	8	141894	143558	1665	2	YHR019C	YHR019C_mRNA	-68
VIII	143851	143974	124	+	-3.16294	6.83737	38.6062	5.81735e-05	0.000256639	Promoter	8	143996	146062	2067	1	YHR020W	YHR020W_mRNA	-22
VIII	148677	148766	90	-	-2.05853	9.4488	193.83	1.80008e-08	5.37374e-07	Promoter	8	147871	148669	799	2	YHR021C	YHR021C_mRNA	-97
VIII	159187	159234	48	-	-1.3888	6.68048	25.2047	0.000357324	0.00116674	Promoter	8	157744	159192	1449	2	YHR024C	YHR024C_mRNA	0
VIII	159393	159431	39	+	-2.58822	6.13946	50.4441	1.70602e-05	9.67541e-05	Promoter	8	159438	160511	1074	1	YHR025W	YHR025W_mRNA	-7
VIII	164705	164796	92	-	1.19981	8.7884	41.1527	4.3645e-05	0.000202456	Promoter	8	161730	164711	2982	2	YHR027C	YHR027C_mRNA	0
VIII	180209	180237	29	+	-1.23273	5.88452	9.37025	0.010506	0.0207645	Promoter	8	180345	181760	1416	1	YHR036W	YHR036W_mRNA	-108
VIII	181916	181970	55	+	1.3377	7.51948	25.7148	0.000329527	0.00109155	Promoter	8	181977	183704	1728	1	YHR037W	YHR037W_mRNA	-7
VIII	193567	193647	81	-	3.21359	5.58896	32.474	0.000124242	0.000477159	Promoter	8	192805	193545	741	2	YHR043C	YHR043C_mRNA	-102
VIII	201308	201388	81	-	-1.49379	6.45109	25.6111	0.000334965	0.00110579	Promoter	8	198740	201310	2571	2	YHR047C	YHR047C_mRNA	0
VIII	206387	206433	47	+	-3.7276	5.92343	101.709	5.36058e-07	6.58702e-06	Promoter	8	206462	207193	732	1	YHR049W	YHR049W_mRNA	-29
VIII	209498	209639	142	+	1.59593	8.46968	98.5941	6.28723e-07	7.37196e-06	Promoter	8	209475	209645	171	1	YHR050W-A	YHR050W-A_mRNA	23
VIII	210768	210826	59	+	-1.74525	6.26771	32.4828	0.000124098	0.000476983	Promoter	8	210848	211978	1131	1	YHR052W	YHR052W_mRNA	-22
VIII	218771	218905	135	-	1.27343	8.44617	71.9474	3.07335e-06	2.56958e-05	Promoter	8	218226	218843	618	2	YHR057C	YHR057C_mRNA	0
VIII	225192	225226	35	-	-1.66745	5.84546	14.2808	0.00290554	0.00690349	Promoter	8	224030	225169	1140	2	YHR063C	YHR063C_mRNA	-57
VIII	227139	227220	82	-	-1.36654	8.6236	63.2901	5.76444e-06	4.18029e-05	Promoter	8	225525	227141	1617	2	YHR064C	YHR064C_mRNA	0
VIII	229047	229101	55	-	-1.57366	6.30982	22.6804	0.000543278	0.00166264	Promoter	8	227532	229037	1506	2	YHR065C	YHR065C_mRNA	-64
VIII	229281	229317	37	+	-4.33346	4.97468	33.6731	0.000106228	0.000419364	Promoter	8	229335	230696	1362	1	YHR066W	YHR066W_mRNA	-18
VIII	232038	232090	53	+	-1.35418	7.44833	35.4177	8.52162e-05	0.000350221	Promoter	8	232133	233296	1164	1	YHR068W	YHR068W_mRNA	-43
VIII	234863	234892	30	+	-1.02599	5.7703	6.41527	0.0273072	0.047	Promoter	8	234881	236380	1500	1	YHR070W	YHR070W_mRNA	0
VIII	239013	239048	36	+	-1.35294	5.83211	11.5691	0.00568891	0.0122434	Promoter	8	239098	241293	2196	1	YHR072W	YHR072W_mRNA	-50
VIII	266839	267058	220	-	1.02656	7.47	21.5557	0.00066176	0.00196469	Promoter	8	262801	266838	4038	2	YHR080C	YHR080C_mRNA	-220
VIII	267465	267537	73	+	-1.65878	8.77289	99.5678	5.97861e-07	7.15216e-06	Promoter	8	267538	268092	555	1	YHR081W	YHR081W_mRNA	-1
VIII	276722	276744	23	+	-1.15064	5.42441	8.50554	0.0136518	0.0258281	Promoter	8	276764	277768	1005	1	YHR085W	YHR085W_mRNA	-20
VIII	281418	281519	102	+	-1.50785	9.46719	86.1278	1.25029e-06	1.25657e-05	Promoter	8	281495	282382	888	1	YHR088W	YHR088W_mRNA	0
VIII	283296	283379	84	-	-3.06293	7.9267	163.925	4.40899e-08	9.88669e-07	Promoter	8	282681	283298	618	2	YHR089C	YHR089C_mRNA	0
VIII	288871	288893	23	-	-8.56386	6.06504	161.122	3.42712e-07	4.6582e-06	Promoter	8	287081	288811	1731	2	YHR092C	YHR092C_mRNA	-82
VIII	292637	292680	44	-	-7.25673	4.88221	55.0591	3.33072e-05	0.000164041	Promoter	8	290913	292625	1713	2	YHR094C	YHR094C_mRNA	-55
VIII	296552	296619	68	-	4.73201	7.98941	448.181	1.85181e-10	5.30054e-08	Promoter	8	294669	296447	1779	2	YHR096C	YHR096C_mRNA	-172
VIII	316388	316448	61	+	1.14351	7.59812	19.7365	0.000924797	0.0026042	Promoter	8	316572	319814	3243	1	YHR102W	YHR102W_mRNA	-124
VIII	325575	325657	83	+	1.97081	5.67373	25.3491	0.000349182	0.00114419	Promoter	8	325598	326626	1029	1	YHR106W	YHR106W_mRNA	0
VIII	32754	32812	59	-	1.84234	7.33075	71.2542	3.22403e-06	2.67716e-05	Promoter	8	27978	32756	4779	2	YHL035C	YHL035C_mRNA	0
VIII	36017	36064	48	-	-2.02135	8.22352	135.809	1.19274e-07	2.08773e-06	Promoter	8	35255	36025	771	2	YHL033C	YHL033C_mRNA	0
VIII	360853	360915	63	+	-1.30706	7.35539	33.5493	0.000107938	0.000424596	Promoter	8	360913	361644	732	1	YHR127W	YHR127W_mRNA	0
VIII	369789	369889	101	-	1.24926	8.24398	75.4597	2.42618e-06	2.09694e-05	Promoter	8	368502	369794	1293	2	YHR132C	YHR132C_mRNA	0
VIII	375656	375750	95	+	2.73808	8.70573	318.985	1.20436e-09	1.10574e-07	Promoter	8	375709	377250	1542	1	YHR137W	YHR137W_mRNA	0
VIII	377697	377798	102	-	1.15663	8.32587	58.7873	8.23824e-06	5.56768e-05	Promoter	8	377355	377699	345	2	YHR138C	YHR138C_mRNA	0
VIII	379210	379241	32	-	7.61805	5.5356	76.7425	8.46939e-06	5.64549e-05	Promoter	8	378219	379199	981	2	YHR139C	YHR139C_mRNA	-42
VIII	382737	382802	66	-	-2.42156	8.83554	125.699	1.78914e-07	2.79934e-06	Promoter	8	381990	382751	762	2	YHR141C	YHR141C_mRNA	0
VIII	38438	38587	150	-	2.7659	7.72509	94.8209	7.67458e-07	8.64456e-06	Promoter	8	36379	38508	2130	2	YHL032C	YHL032C_mRNA	0
VIII	388693	388782	90	-	-2.2433	7.09173	54.6047	1.17282e-05	7.22715e-05	Promoter	8	387788	388726	939	2	YHR144C	YHR144C_mRNA	0
VIII	393493	393514	22	+	-1.74272	5.53642	8.63232	0.0131267	0.0249705	Promoter	8	393534	394085	552	1	YHR148W	YHR148W_mRNA	-20
VIII	402914	402945	32	+	-1.28506	6.39292	20.6891	0.000774192	0.00224106	Promoter	8	402966	406178	3213	1	YHR154W	YHR154W_mRNA	-21
VIII	417461	417515	55	+	1.1098	6.3603	14.728	0.00262043	0.00631238	Promoter	8	417549	419063	1515	1	YHR159W	YHR159W_mRNA	-34
VIII	422883	422917	35	+	-2.0716	7.74081	131.443	1.41597e-07	2.34357e-06	Promoter	8	423072	423461	390	1	YHR162W	YHR162W_mRNA	-155
VIII	423705	423726	22	+	-2.88445	6.13841	74.874	2.52203e-06	2.16441e-05	Promoter	8	423724	424473	750	1	YHR163W	YHR163W_mRNA	0
VIII	443739	443819	81	+	-1.79336	7.99175	133.1	1.32591e-07	2.2559e-06	Promoter	8	443828	445384	1557	1	YHR170W	YHR170W_mRNA	-9
VIII	451289	451311	23	+	-1.25485	8.72339	49.6284	1.84162e-05	0.000102767	Promoter	8	451327	452640	1314	1	YHR174W	YHR174W_mRNA	-16
VIII	452872	452999	128	+	1.26756	7.05104	13.2942	0.00367529	0.00841599	Promoter	8	452872	453441	570	1	YHR175W	YHR175W_mRNA	0
VIII	467170	467228	59	+	-1.20527	6.52772	18.0868	0.00127601	0.00340783	Promoter	8	467228	467914	687	1	YHR181W	YHR181W_mRNA	0
VIII	470875	470887	13	+	-1.97627	5.08947	17.5698	0.00141707	0.00372727	Promoter	8	470960	472429	1470	1	YHR183W	YHR183W_mRNA	-73
VIII	491857	491895	39	+	-1.49625	5.59293	16.2273	0.00187855	0.0047412	Promoter	8	491931	493658	1728	1	YHR196W	YHR196W_mRNA	-36
VIII	493855	493892	38	+	-4.99753	5.54558	52.9369	1.35888e-05	8.08349e-05	Promoter	8	493896	496187	2292	1	YHR197W	YHR197W_mRNA	-4
VIII	498385	498482	98	-	2.6386	6.09912	34.2418	9.87693e-05	0.000394591	Promoter	8	497490	498422	933	2	YHR199C	YHR199C_mRNA	0
VIII	501138	501187	50	-	-1.3338	6.66778	24.2123	0.000419742	0.00133582	Promoter	8	499950	501143	1194	2	YHR201C	YHR201C_mRNA	0
VIII	505538	505655	118	-	-2.40957	8.569	169.37	3.70482e-08	8.66714e-07	Promoter	8	504476	505530	1055	2	YHR203C	YHR203C_mRNA	-125
VIII	509266	509325	60	+	3.79242	5.27543	25.4933	0.000341271	0.00112204	Promoter	8	509363	511837	2475	1	YHR205W	YHR205W_mRNA	-38
VIII	517467	517522	56	+	-1.73897	7.65941	85.9586	1.26277e-06	1.25657e-05	Promoter	8	517532	518713	1182	1	YHR208W	YHR208W_mRNA	-10
VIII	519396	519439	44	+	3.6576	6.30783	54.6399	1.16923e-05	7.22017e-05	Promoter	8	519437	520312	876	1	YHR209W	YHR209W_mRNA	0
VIII	70250	70266	17	+	-1.46701	5.1797	10.6311	0.00732793	0.0152579	Promoter	8	70276	71874	1599	1	YHL017W	YHL017W_mRNA	-10
VIII	75358	75439	82	+	-3.41513	9.899	417.88	2.72636e-10	6.63324e-08	Promoter	8	75412	75777	366	1	YHL015W	YHL015W_mRNA	0
VIII	83719	83794	76	-	1.54548	7.3372	61.6669	6.53937e-06	4.64534e-05	Promoter	8	81964	83721	1758	2	YHL010C	YHL010C_mRNA	0
X	111194	111390	197	-	1.06406	8.85265	67.05	4.34889e-06	3.31688e-05	Promoter	10	109966	111159	1194	2	YJL164C	YJL164C_mRNA	-231
X	113328	113413	86	-	1.90631	7.0039	60.1123	7.399e-06	5.12141e-05	Promoter	10	111666	113333	1668	2	YJL163C	YJL163C_mRNA	0
X	117181	117265	85	+	2.61501	6.25771	21.4358	0.000676104	0.00200239	Promoter	10	117245	117787	543	1	YJL161W	YJL161W_mRNA	0
X	120292	121121	830	+	1.30948	11.6427	58.3769	8.52056e-06	5.64864e-05	Promoter	10	120449	121690	1242	1	YJL159W	YJL159W_mRNA	0
X	122930	123010	81	-	-1.49597	9.66311	124.2	1.90484e-07	2.93907e-06	Promoter	10	122265	122948	684	2	YJL158C	YJL158C_mRNA	0
X	126374	126430	57	-	-1.40531	5.40331	11.6942	0.00550482	0.0119051	Promoter	10	123836	126328	2493	2	YJL157C	YJL157C_mRNA	-102
X	129004	129035	32	-	3.51075	5.3726	21.7115	0.000643654	0.00192031	Promoter	10	126853	128952	2100	2	YJL156C	YJL156C_mRNA	-83
X	130679	130830	152	-	2.16437	6.60995	42.0925	3.93952e-05	0.000187571	Promoter	10	129285	130643	1359	2	YJL155C	YJL155C_mRNA	-187
X	137334	137358	25	+	2.2317	5.96714	26.5246	0.000290457	0.000984922	Promoter	10	137379	139370	1992	1	YJL149W	YJL149W_mRNA	-21
X	139949	139952	4	-	1.03007	5.58794	7.29496	0.0201658	0.0363163	Promoter	10	139761	139950	190	2	snR190	snR190_snoRNA	0
X	140362	140395	34	+	-3.0657	7.92506	171.567	3.45866e-08	8.24065e-07	Promoter	10	140437	141138	702	1	YJL148W	YJL148W_mRNA	-42
X	154722	154771	50	-	-1.6801	8.00598	89.8533	1.00908e-06	1.07209e-05	Promoter	10	153504	154691	1188	2	YJL138C	YJL138C_mRNA	-80
X	156127	156235	109	-	2.30484	7.21365	67.5063	4.20662e-06	3.23371e-05	Promoter	10	156169	156252	84	1	YJL136W-A	YJL136W-A_mRNA	0
X	157261	157349	89	-	-2.83188	8.47099	130.942	1.44463e-07	2.36919e-06	Promoter	10	156550	157273	724	2	YJL136C	YJL136C_mRNA	0
X	159841	159895	55	-	-1.87841	7.50606	90.1639	9.91566e-07	1.06043e-05	Promoter	10	159623	159847	225	2	YJL133C-A	YJL133C-A_mRNA	0
X	186689	186731	43	-	-1.94943	5.56614	7.04192	0.0219632	0.0389336	Promoter	10	185528	186679	1152	2	YJL125C	YJL125C_mRNA	-52
X	18744	18779	36	-	7.11181	5.11156	56.0586	3.0968e-05	0.000155191	Promoter	10	16767	18536	1770	2	YJL221C	YJL221C_mRNA	-243
X	189675	189718	44	+	-1.38761	7.22706	26.6613	0.000284413	0.000970516	Promoter	10	189716	190243	528	1	YJL122W	YJL122W_mRNA	0
X	191098	191115	18	-	-1.84749	6.49316	38.8334	5.66669e-05	0.000251819	Promoter	10	190374	191090	717	2	YJL121C	YJL121C_mRNA	-25
X	191638	191687	50	+	-2.0395	5.37753	16.5245	0.0017627	0.00449543	Promoter	10	191639	192298	660	1	YJL118W	YJL118W_mRNA	0
X	192434	192516	83	+	1.96018	5.84029	23.1102	0.000504729	0.00156733	Promoter	10	192531	193466	936	1	YJL117W	YJL117W_mRNA	-15
X	195037	195096	60	-	2.87562	7.40978	146.781	7.92006e-08	1.52328e-06	Promoter	10	193860	194873	1014	2	YJL116C	YJL116C_mRNA	-223
X	217319	217351	33	-	-2.42462	6.69906	90.0485	9.98033e-07	1.06464e-05	Promoter	10	212000	217309	5310	2	YJL109C	YJL109C_mRNA	-42
X	220037	220111	75	-	-1.01055	7.47313	9.51618	0.0100642	0.0200132	Promoter	10	218853	220016	1164	2	YJL107C	YJL107C_mRNA	-95
X	23090	23132	43	+	2.2478	6.77011	36.227	7.71548e-05	0.000321434	Promoter	10	23133	23729	597	1	YJL217W	YJL217W_mRNA	-1
X	231259	231330	72	+	2.45574	6.883	88.7995	1.07127e-06	1.12103e-05	Promoter	10	231301	233760	2460	1	YJL102W	YJL102W_mRNA	0
X	236484	236512	29	-	1.44642	7.25682	25.6026	0.000335419	0.00110654	Promoter	10	234320	236356	2037	2	YJL101C	YJL101C_mRNA	-156
X	241817	241980	164	+	1.11917	5.8414	9.29366	0.010747	0.0211464	Promoter	10	242082	245258	3177	1	YJL098W	YJL098W_mRNA	-102
X	265912	265932	21	+	6.81655	4.86566	43.7997	8.27728e-05	0.000341333	Promoter	10	265926	268415	2490	1	YJL089W	YJL089W_mRNA	0
X	281067	281138	72	+	-3.38219	5.61388	38.0656	6.19519e-05	0.000268201	Promoter	10	281185	283380	2196	1	YJL082W	YJL082W_mRNA	-47
X	305862	305931	70	-	-1.27533	6.29069	21.2025	0.00070509	0.00207812	Promoter	10	305221	305862	642	2	YJL072C	YJL072C_mRNA	0
X	312692	312770	79	-	-1.33845	7.52017	46.0387	2.612e-05	0.000135501	Promoter	10	310922	312706	1785	2	YJL069C	YJL069C_mRNA	0
X	313915	313999	85	-	1.40509	6.5012	20.539	0.000795879	0.00228616	Promoter	10	313016	313915	900	2	YJL068C	YJL068C_mRNA	0
X	314854	314925	72	-	1.72254	7.61308	75.6945	2.38896e-06	2.07498e-05	Promoter	10	314114	314872	759	2	YJL066C	YJL066C_mRNA	0
X	330131	330227	97	-	1.85366	5.96165	27.2905	0.000258437	0.000892514	Promoter	10	328118	330121	2004	2	YJL057C	YJL057C_mRNA	-106
X	338155	338229	75	+	2.43836	8.30599	161.711	4.73966e-08	1.02961e-06	Promoter	10	338271	339269	999	1	YJL052W	YJL052W_mRNA	-42
X	342416	342515	100	+	-1.60631	8.98778	72.1736	3.026e-06	2.53434e-05	Promoter	10	342522	345743	3222	1	YJL050W	YJL050W_mRNA	-7
X	348633	348735	103	-	1.21847	7.7198	24.9037	0.000375022	0.00121414	Promoter	10	347447	348637	1191	2	YJL048C	YJL048C_mRNA	0
X	355972	356011	40	+	7.70476	5.571	40.9747	0.000107288	0.000422383	Promoter	10	356024	357928	1905	1	YJL045W	YJL045W_mRNA	-13
X	36277	36293	17	-	-7.08297	4.74469	60.2937	2.30224e-05	0.000122754	Promoter	10	33850	36249	2400	2	YJL212C	YJL212C_mRNA	-44
X	37903	37952	50	+	-1.54326	6.52826	28.2696	0.000223362	0.000788164	Promoter	10	38005	39969	1965	1	YJL209W	YJL209W_mRNA	-53
X	381249	381336	88	+	2.98424	7.97212	120.918	2.19037e-07	3.2896e-06	Promoter	10	381327	383375	2049	1	YJL034W	YJL034W_mRNA	0
X	383785	383820	36	+	-3.43438	6.26476	34.1302	0.000100183	0.000398927	Promoter	10	383837	386149	2313	1	YJL033W	YJL033W_mRNA	-17
X	419587	419637	51	-	-2.18665	5.64368	22.7367	0.000538032	0.00165386	Promoter	10	417562	419562	2001	2	YJL010C	YJL010C_mRNA	-75
X	438833	438870	38	+	-1.41402	7.54761	60.7659	7.0223e-06	4.88848e-05	Promoter	10	438865	440646	1782	1	YJR002W	YJR002W_mRNA	0
X	448691	448825	135	-	5.32156	7.42338	111.608	3.32078e-07	4.52631e-06	Promoter	10	448477	448758	282	2	YJR005C-A	YJR005C-A_mRNA	0
X	450882	450936	55	+	-1.43957	6.32771	17.8896	0.00132777	0.00352478	Promoter	10	451020	451934	915	1	YJR007W	YJR007W_mRNA	-84
X	452254	452452	199	+	1.99364	7.77014	68.513	3.91167e-06	3.07997e-05	Promoter	10	452430	453446	1017	1	YJR008W	YJR008W_mRNA	0
X	466212	466227	16	-	-2.11803	6.02385	43.2636	3.4762e-05	0.000169152	Promoter	10	464451	466208	1758	2	YJR016C	YJR016C_mRNA	-19
X	469729	469779	51	+	1.34596	6.96488	41.7744	4.07767e-05	0.000192081	Promoter	10	469784	470113	330	1	YJR022W	YJR022W_mRNA	-5
X	471623	471841	219	-	1.37504	8.98705	75.7214	2.38474e-06	2.07498e-05	Promoter	10	471138	471671	534	2	YJR025C	YJR025C_mRNA	0
X	478291	478328	38	+	1.50133	5.56522	13.5365	0.00346593	0.00800817	Promoter	10	478344	479666	1323	1	YJR028W	YJR028W	-16
X	496572	496663	92	+	1.17528	8.14121	19.1827	0.0010282	0.0028422	Promoter	10	496683	497009	327	1	YJR034W	YJR034W_mRNA	-20
X	497324	497354	31	+	1.49383	6.45608	25.2697	0.000353636	0.00115567	Promoter	10	497355	500612	3258	1	YJR035W	YJR035W_mRNA	-1
X	49894	50158	265	-	1.48564	8.46268	105.087	4.53159e-07	5.83353e-06	Promoter	10	47659	49935	2277	2	YJL206C	YJL206C_mRNA	0
X	503936	503987	52	+	1.49208	6.29231	21.8847	0.000624198	0.00186684	Promoter	10	503936	507301	3366	1	YJR039W	YJR039W_mRNA	0
X	513811	513842	32	-	-1.59286	5.76041	22.4772	0.000562703	0.00171669	Promoter	10	510239	513763	3525	2	YJR041C	YJR041C_mRNA	-79
X	528461	528516	56	-	1.64739	6.52326	30.4711	0.000163046	0.00060379	Promoter	10	526884	528476	1593	2	YJR049C	YJR049C_mRNA	0
X	531977	532081	105	+	1.22744	7.60784	27.3011	0.000258025	0.000891724	Promoter	10	532062	533759	1698	1	YJR052W	YJR052W_mRNA	0
X	538713	538762	50	+	1.03584	6.01584	10.7743	0.00704459	0.0147563	Promoter	10	538772	539266	495	1	YJR055W	YJR055W_mRNA	-10
X	54354	54376	23	+	-2.58176	5.99849	51.8375	1.5006e-05	8.77637e-05	Promoter	10	54379	56178	1800	1	YJL201W	YJL201W_mRNA	-3
X	555137	555185	49	+	-3.45764	5.53615	38.7688	5.70903e-05	0.000253237	Promoter	10	555195	555572	378	1	YJR063W	YJR063W_mRNA	-10
X	559368	559395	28	+	1.17504	6.778	18.7647	0.00111537	0.00303885	Promoter	10	559416	566828	7413	1	YJR066W	YJR066W_mRNA	-21
X	569408	569477	70	-	-1.37892	7.20443	50.3861	1.71526e-05	9.69659e-05	Promoter	10	568806	569399	594	2	YJR069C	YJR069C_mRNA	-78
X	570617	570705	89	-	-3.04613	6.8891	128.049	1.62394e-07	2.61659e-06	Promoter	10	569621	570598	978	2	YJR070C	YJR070C_mRNA	-107
X	572940	572976	37	-	2.55255	6.36323	43.632	3.34395e-05	0.000164527	Promoter	10	572315	572935	621	2	YJR073C	YJR073C_mRNA	-41
X	581611	581699	89	-	1.28329	7.05383	22.8993	0.000523222	0.00161548	Promoter	10	580432	581616	1185	2	YJR080C	YJR080C_mRNA	0
X	58814	58882	69	-	-3.98072	5.86326	50.9896	1.62188e-05	9.28476e-05	Promoter	10	56444	58813	2370	2	YJL200C	YJL200C_mRNA	-69
X	598650	598735	86	+	-4.03032	6.33669	83.2959	1.47982e-06	1.40915e-05	Promoter	10	598735	603078	4344	1	YJR092W	YJR092W_mRNA	0
X	605791	605891	101	-	2.82179	7.31412	91.5098	9.19698e-07	1.00342e-05	Promoter	10	604569	605651	1083	2	YJR094C	YJR094C_mRNA	-240
X	607375	607489	115	-	2.74144	7.60592	174.382	3.17097e-08	7.75374e-07	Promoter	10	605936	607424	1489	2	IRT1	IRT1_ncRNA	0
X	60771	60838	68	+	-2.65501	6.69413	69.006	3.77614e-06	2.98776e-05	Promoter	10	60844	63489	2646	1	YJL198W	YJL198W_mRNA	-6
X	608273	608309	37	+	-2.21694	7.60737	159.014	5.18271e-08	1.1061e-06	Promoter	10	608305	608858	554	1	YJR094W-A	YJR094W-A_mRNA	0
X	609598	609676	79	+	10.0809	7.75889	482.479	2.42233e-09	1.51116e-07	Promoter	10	609773	610741	969	1	YJR095W	YJR095W_mRNA	-97
X	611073	611197	125	+	2.17251	9.15996	116.412	2.66896e-07	3.78041e-06	Promoter	10	611195	612043	849	1	YJR096W	YJR096W_mRNA	0
X	612314	612350	37	+	-4.16561	5.20064	29.7864	0.000179477	0.000653694	Promoter	10	612413	612931	519	1	YJR097W	YJR097W_mRNA	-63
X	620681	620766	86	+	1.51533	7.18254	43.4348	3.41402e-05	0.000166961	Promoter	10	620754	622490	1737	1	YJR103W	YJR103W_mRNA	0
X	622762	623071	310	-	1.15928	9.95243	64.9381	5.08588e-06	3.77305e-05	Promoter	10	622550	623014	465	2	YJR104C	YJR104C_mRNA	0
X	623534	623561	28	+	-1.36066	6.31661	17.3656	0.0014778	0.00386613	Promoter	10	623581	624603	1023	1	YJR105W	YJR105W_mRNA	-20
X	628642	628744	103	-	1.23773	9.57702	76.9954	2.19451e-06	1.92405e-05	Promoter	10	628712	629083	372	1	YJR108W	YJR108W_mRNA	0
X	632953	633028	76	-	-2.26305	8.08358	118.528	2.4303e-07	3.5513e-06	Promoter	10	629585	632941	3357	2	YJR109C	YJR109C_mRNA	-87
X	636786	636840	55	-	-2.8411	5.29429	13.768	0.00327894	0.00763047	Promoter	10	635855	636706	852	2	YJR111C	YJR111C_mRNA	-134
X	639995	640166	172	+	-3.61643	7.59173	206.01	1.297e-08	4.38277e-07	Promoter	10	639942	640451	510	1	YJR115W	YJR115W_mRNA	53
X	649698	649782	85	+	2.26934	5.88877	31.2203	0.000147056	0.00055129	Promoter	10	649776	651269	1494	1	YJR122W	YJR122W_mRNA	0
X	651814	651910	97	+	-2.27512	9.68516	299.496	1.70068e-09	1.35376e-07	Promoter	10	651901	652578	678	1	YJR123W	YJR123W_mRNA	0
X	667368	667456	89	+	-1.12702	6.48496	11.9518	0.0051476	0.0112395	Promoter	10	667644	669293	1650	1	YJR131W	YJR131W_mRNA	-188
X	68782	68814	33	-	-2.06113	5.67369	26.4059	0.000295826	0.00100104	Promoter	10	67850	68782	933	2	YJL196C	YJL196C_mRNA	0
X	700618	700705	88	-	-2.25749	6.00472	17.6969	0.00138074	0.00364353	Promoter	10	698326	700614	2289	2	YJR143C	YJR143C_mRNA	-91
X	703059	703133	75	-	-2.96954	8.40652	359.701	6.22812e-10	8.66094e-08	Promoter	10	702027	703068	1042	2	YJR145C	YJR145C_mRNA	0
X	705597	705755	159	+	2.01387	9.05441	224.736	8.10977e-09	3.08298e-07	Promoter	10	705744	706874	1131	1	YJR148W	YJR148W_mRNA	0
X	707188	707226	39	+	6.94366	4.97229	49.3395	5.17247e-05	0.000233425	Promoter	10	707160	708374	1215	1	YJR149W	YJR149W_mRNA	28
X	71347	71368	22	+	-2.56218	5.24657	32.0935	0.000130696	0.000498015	Promoter	10	71366	72574	1209	1	YJL193W	YJL193W_mRNA	0
X	717533	717611	79	-	1.10857	5.45688	6.94936	0.0226681	0.0399358	Promoter	10	717580	717630	51	1	YJR151W-A	YJR151W-A_mRNA	0
X	73420	73471	52	-	-1.16527	8.10071	49.4689	1.86959e-05	0.000104004	Promoter	10	72710	73414	705	2	YJL192C	YJL192C_mRNA	-57
X	73736	73801	66	+	-2.48448	7.33528	113.202	3.08561e-07	4.261e-06	Promoter	10	73787	74611	825	1	YJL191W	YJL191W_mRNA	0
X	75242	75390	149	-	-3.37463	9.23462	408.472	3.09146e-10	6.80685e-08	Promoter	10	74910	75302	393	2	YJL190C	YJL190C_mRNA	0
X	75898	75915	18	+	-1.56904	7.5401	67.2508	4.28559e-06	3.27888e-05	Promoter	10	75933	76474	542	1	YJL189W	YJL189W_mRNA	-18
X	79396	79451	56	-	3.44772	4.99764	20.2795	0.000835106	0.00238476	Promoter	10	76803	79262	2460	2	YJL187C	YJL187C_mRNA	-189
X	80107	80134	28	+	1.03665	6.10013	10.3897	0.00783674	0.0161378	Promoter	10	80155	81915	1761	1	YJL186W	YJL186W_mRNA	-21
X	90679	90777	99	+	-2.85753	8.77084	352.322	6.97981e-10	8.70865e-08	Promoter	10	90786	91657	872	1	YJL177W	YJL177W_mRNA	-9
X	94952	95071	120	+	-1.26945	7.29339	35.0906	8.87539e-05	0.000362312	Promoter	10	95092	95922	831	1	YJL174W	YJL174W_mRNA	-21
XI	107099	107140	42	+	-2.61217	7.02446	126.529	1.72861e-07	2.75725e-06	Promoter	11	107316	108599	1284	1	YKL181W	YKL181W_mRNA	-176
XI	109213	109275	63	+	-2.94919	9.20876	375.733	4.89949e-10	8.29424e-08	Promoter	11	109269	110129	861	1	YKL180W	YKL180W_mRNA	0
XI	125682	125796	115	+	-1.43406	10.6268	60.2491	7.31825e-06	5.07273e-05	Promoter	11	125759	127042	1284	1	YKL172W	YKL172W_mRNA	0
XI	140689	140748	60	-	2.52905	6.26915	41.8064	4.06352e-05	0.000191786	Promoter	11	137932	140691	2760	2	YKL165C	YKL165C_mRNA	0
XI	142894	142911	18	-	-1.16389	8.4259	63.4774	5.68216e-06	4.13294e-05	Promoter	11	141794	142819	1026	2	YKL164C	YKL164C_mRNA	-92
XI	144320	144384	65	+	10.2108	7.88058	528.198	1.59985e-09	1.35376e-07	Promoter	11	144401	145378	978	1	YKL163W	YKL163W_mRNA	-17
XI	150710	150763	54	-	6.92372	4.94034	39.557	0.000122901	0.000473131	Promoter	11	149386	150687	1302	2	YKL161C	YKL161C_mRNA	-76
XI	158543	158801	259	+	-2.08794	9.02388	243.854	5.21104e-09	2.30517e-07	Promoter	11	158613	159212	600	1	YKL156W	YKL156W_mRNA	0
XI	165934	165965	32	-	1.39422	8.32347	80.5987	1.74587e-06	1.61509e-05	Promoter	11	164917	165930	1014	2	YKL151C	YKL151C_mRNA	-35
XI	171200	171316	117	-	1.83987	8.48136	131.593	1.40754e-07	2.33757e-06	Promoter	11	169207	171129	1923	2	YKL148C	YKL148C_mRNA	-187
XI	171583	171783	201	+	1.7789	7.92031	78.0355	2.05235e-06	1.83844e-05	Promoter	11	171783	173861	2079	1	YKL146W	YKL146W_mRNA	0
XI	176727	176775	49	+	-2.77712	6.73128	101.412	5.44148e-07	6.61956e-06	Promoter	11	176781	178172	1392	1	YKL143W	YKL143W_mRNA	-6
XI	178436	178493	58	+	1.66787	8.31836	67.5472	4.19415e-06	3.23196e-05	Promoter	11	178515	179174	660	1	YKL142W	YKL142W_mRNA	-22
XI	179620	179675	56	+	1.14276	7.49139	36.0708	7.8638e-05	0.000326217	Promoter	11	179667	180263	597	1	YKL141W	YKL141W_mRNA	0
XI	185010	185069	60	-	1.22343	6.14271	9.44536	0.0102758	0.0203674	Promoter	11	184803	185012	210	2	YKL138C-A	YKL138C-A_mRNA	0
XI	185801	185833	33	+	7.58206	5.50612	73.6576	1.00579e-05	6.45672e-05	Promoter	11	185957	186292	336	1	YKL137W	YKL137W_mRNA	-124
XI	201789	201810	22	-	-2.09121	6.20695	49.1168	1.93315e-05	0.000106773	Promoter	11	200884	201771	888	2	YKL128C	YKL128C_mRNA	-39
XI	203483	203516	34	+	-2.79672	5.83992	60.0428	7.44047e-06	5.1355e-05	Promoter	11	203541	205253	1713	1	YKL127W	YKL127W_mRNA	-25
XI	210432	210516	85	+	1.48063	5.40139	10.9212	0.00676741	0.0142432	Promoter	11	210593	212332	1740	1	YKL124W	YKL124W_mRNA	-77
XI	217188	217316	129	+	-1.52753	8.03548	84.9646	1.3391e-06	1.31638e-05	Promoter	11	217344	218318	975	1	YKL120W	YKL120W_mRNA	-28
XI	219233	219271	39	-	-1.18444	5.64399	11.9131	0.00519948	0.0113303	Promoter	11	218570	219217	648	2	YKL119C	YKL119C_mRNA	-54
XI	22074	22381	308	+	5.84578	10.0338	827.892	6.09837e-12	9.89156e-09	Promoter	11	22234	24084	1851	1	YKL217W	YKL217W_mRNA	0
XI	222894	222924	31	-	-3.20127	4.86408	28.35	0.000220738	0.000781742	Promoter	11	221344	222900	1557	2	YKL116C	YKL116C_mRNA	0
XI	225887	225937	51	-	-1.43081	7.66377	45.065	2.8828e-05	0.000145687	Promoter	11	224727	225875	1149	2	YKL113C	YKL113C_mRNA	-62
XI	229898	229939	42	-	-2.19737	7.16499	99.2816	6.06743e-07	7.20101e-06	Promoter	11	228939	229880	942	2	YKL110C	YKL110C_mRNA	-59
XI	230099	230126	28	-	-2.97439	5.53451	51.5758	1.53686e-05	8.93473e-05	Promoter	11	228939	229880	942	2	YKL110C	YKL110C_mRNA	-246
XI	245381	245601	221	-	2.08711	8.47498	125.458	1.80714e-07	2.81844e-06	Promoter	11	243220	245373	2154	2	YKL104C	YKL104C_mRNA	-228
XI	247672	247793	122	-	1.95454	8.59944	158.047	5.35344e-08	1.1326e-06	Promoter	11	246138	247682	1545	2	YKL103C	YKL103C_mRNA	0
XI	248659	248678	20	+	-1.24112	5.217	9.21804	0.0109915	0.0215403	Promoter	11	248920	253476	4557	1	YKL101W	YKL101W_mRNA	-242
XI	25148	25206	59	+	-4.23001	7.95595	321.789	1.14794e-09	1.07712e-07	Promoter	11	25215	26159	945	1	YKL216W	YKL216W_mRNA	-9
XI	256483	256566	84	-	-2.02604	7.35343	91.0829	9.41808e-07	1.01841e-05	Promoter	11	255720	256472	753	2	YKL099C	YKL099C_mRNA	-94
XI	261085	261110	26	+	2.64053	6.83279	58.55	8.4001e-06	5.62614e-05	Promoter	11	261132	261851	720	1	YKL096W	YKL096W_mRNA	-22
XI	262092	262192	101	+	1.00702	7.91493	30.4449	0.000163642	0.000605536	Promoter	11	262277	263113	837	1	YKL095W	YKL095W_mRNA	-85
XI	264699	264786	88	+	3.26122	6.25562	39.9563	4.98622e-05	0.000227394	Promoter	11	264789	265808	1020	1	YKL093W	YKL093W_mRNA	-3
XI	278250	278299	50	+	4.19557	6.6037	84.8845	1.34548e-06	1.31798e-05	Promoter	11	278281	278664	384	1	YKL086W	YKL086W_mRNA	0
XI	278967	279070	104	+	1.41034	9.21019	103.782	4.83262e-07	6.10357e-06	Promoter	11	279123	280127	1005	1	YKL085W	YKL085W_mRNA	-53
XI	282332	282421	90	-	-1.14817	9.89913	57.0272	9.5328e-06	6.24315e-05	Promoter	11	281025	282329	1305	2	YKL082C	YKL082C_mRNA	-92
XI	282812	282898	87	+	-2.42609	7.48747	84.1475	1.40594e-06	1.35204e-05	Promoter	11	282891	284455	1565	1	YKL081W	YKL081W_mRNA	0
XI	284903	284947	45	+	-1.53284	8.3898	83.3814	1.4722e-06	1.40465e-05	Promoter	11	285030	286208	1179	1	YKL080W	YKL080W_mRNA	-83
XI	296353	296430	78	+	1.45395	7.91047	61.7296	6.50726e-06	4.62929e-05	Promoter	11	296430	299075	2646	1	YKL073W	YKL073W_mRNA	0
XI	299371	299377	7	+	-7.38289	5.0002	73.6011	1.00902e-05	6.46891e-05	Promoter	11	299582	301882	2301	1	YKL072W	YKL072W_mRNA	-205
XI	305070	305097	28	+	7.62804	5.53967	79.0418	7.48083e-06	5.15605e-05	Promoter	11	305114	305884	771	1	YKL071W	YKL071W_mRNA	-17
XI	315876	315982	107	+	4.58245	6.94453	126.254	1.7484e-07	2.76224e-06	Promoter	11	315954	316175	222	1	YKL065W-A	YKL065W-A_mRNA	0
XI	317004	317136	133	-	1.53531	8.85086	93.1645	8.39565e-07	9.28483e-06	Promoter	11	316437	317057	621	2	YKL065C	YKL065C_mRNA	0
XI	334925	335003	79	-	-2.04611	8.81835	89.6301	1.02189e-06	1.08262e-05	Promoter	11	334412	334915	504	2	YKL056C	YKL056C_mRNA	-88
XI	34128	34151	24	-	1.21927	6.72043	24.2046	0.000420273	0.00133663	Promoter	11	31960	34107	2148	2	YKL213C	YKL213C_mRNA	-44
XI	360182	360244	63	+	2.3068	6.69884	39.1175	5.48468e-05	0.000245073	Promoter	11	360143	360817	675	1	YKL041W	YKL041W_mRNA	39
XI	38147	38230	84	-	-2.41087	5.6134	22.4548	0.000564892	0.0017212	Promoter	11	36699	38153	1455	2	YKL211C	YKL211C_mRNA	0
XI	384749	384847	99	-	-3.50235	8.3599	311.914	1.36168e-09	1.20472e-07	Promoter	11	382716	384725	2010	2	YKL029C	YKL029C_mRNA	-122
XI	387418	387519	102	+	-1.01931	5.92065	7.7245	0.0175001	0.0321462	Promoter	11	387562	388905	1344	1	YKL027W	YKL027W_mRNA	-43
XI	389884	390020	137	-	3.84505	7.96736	219.25	9.26882e-09	3.41682e-07	Promoter	11	389380	389883	504	2	YKL026C	YKL026C_mRNA	-137
XI	393352	393365	14	-	-1.3449	5.69412	9.39248	0.0104372	0.0206453	Promoter	11	393146	393373	228	2	YKL023C-A	YKL023C-A_mRNA	21
XI	407968	408093	126	-	1.62766	8.81707	102.18	5.23479e-07	6.45626e-06	Promoter	11	407465	407989	525	2	YKL016C	YKL016C_mRNA	0
XI	408428	408499	72	+	1.32674	6.47865	25.5966	0.000335734	0.00110683	Promoter	11	408544	411483	2940	1	YKL015W	YKL015W_mRNA	-45
XI	416922	416943	22	-	-4.84996	5.41061	52.2973	1.43931e-05	8.47241e-05	Promoter	11	411619	416913	5295	2	YKL014C	YKL014C_mRNA	-30
XI	426165	426263	99	+	-1.85739	9.08672	85.5416	1.29415e-06	1.28256e-05	Promoter	11	426242	426952	711	1	YKL009W	YKL009W_mRNA	0
XI	428577	428642	66	-	-3.68523	4.78868	21.6998	0.00064499	0.00192076	Promoter	11	427295	428551	1257	2	YKL008C	YKL008C_mRNA	-91
XI	431861	431912	52	+	-3.6847	8.64533	277.362	2.58654e-09	1.57512e-07	Promoter	11	431906	432720	815	1	YKL006W	YKL006W_mRNA	0
XI	437684	437738	55	+	1.05882	8.49762	45.644	2.71798e-05	0.000140103	Promoter	11	437778	438544	767	1	YKL002W	YKL002W_mRNA	-40
XI	452154	452201	48	+	-1.15824	8.0216	10.4413	0.00772446	0.0159272	Promoter	11	452201	454078	1878	1	YKR008W	YKR008W_mRNA	0
XI	457091	457222	132	-	9.61654	7.33049	254.262	4.45872e-08	9.91455e-07	Promoter	11	454352	457054	2703	2	YKR009C	YKR009C_mRNA	-168
XI	46305	46396	92	-	-1.43329	8.21179	66.7567	4.44332e-06	3.37304e-05	Promoter	11	42423	46295	3873	2	YKL209C	YKL209C_mRNA	-101
XI	463886	463932	47	+	-1.97924	8.17688	106.344	4.26227e-07	5.60547e-06	Promoter	11	463959	464948	990	1	YKR013W	YKR013W_mRNA	-27
XI	473419	473468	50	-	1.45071	6.44359	16.2352	0.00187535	0.00473558	Promoter	11	471694	473349	1656	2	YKR017C	YKR017C_mRNA	-119
XI	475907	475958	52	-	1.33194	8.71288	92.1665	8.86862e-07	9.74147e-06	Promoter	11	473723	475900	2178	2	YKR018C	YKR018C_mRNA	-58
XI	489705	489810	106	-	-1.25892	6.89425	28.3748	0.000219935	0.000779463	Promoter	11	488738	489655	918	2	YKR026C	YKR026C_mRNA	-155
XI	49829	49866	38	-	1.1619	6.41426	9.93438	0.00891522	0.0180155	Promoter	11	49006	49809	804	2	YKL206C	YKL206C_mRNA	-57
XI	506890	506918	29	+	7.18913	5.18122	57.7836	2.73824e-05	0.000140997	Promoter	11	506898	507707	810	1	YKR034W	YKR034W_mRNA	0
XI	514960	515020	61	+	8.02186	5.89338	94.0862	3.57129e-06	2.87238e-05	Promoter	11	515063	516871	1809	1	YKR039W	YKR039W_mRNA	-43
XI	519298	519352	55	+	-2.0698	7.43642	73.353	2.79254e-06	2.35911e-05	Promoter	11	519527	520624	1098	1	YKR042W	YKR042W_mRNA	-175
XI	521694	521748	55	-	-1.2529	7.91502	57.8733	8.88267e-06	5.86473e-05	Promoter	11	520897	521712	816	2	YKR043C	YKR043C_mRNA	0
XI	521936	521970	35	+	-1.07751	5.85145	9.24007	0.0109196	0.0214426	Promoter	11	522015	523346	1332	1	YKR044W	YKR044W_mRNA	-45
XI	525074	525109	36	-	4.08503	6.52857	38.8338	5.66643e-05	0.000251819	Promoter	11	524223	525074	852	2	YKR046C	YKR046C_mRNA	0
XI	527171	527263	93	-	2.31142	8.25462	185.907	2.2517e-08	6.17283e-07	Promoter	11	526830	527231	402	2	YKR049C	YKR049C_mRNA	0
XI	551608	551654	47	+	-2.38487	8.01987	179.398	2.72508e-08	6.97907e-07	Promoter	11	551657	552242	586	1	YKR057W	YKR057W_mRNA	-3
XI	554889	554993	105	+	-1.63752	6.21863	34.0516	0.000101193	0.00040229	Promoter	11	554987	556174	1188	1	YKR059W	YKR059W_mRNA	0
XI	556447	556489	43	+	-1.94929	6.81357	75.5018	2.41945e-06	2.09485e-05	Promoter	11	556518	557342	825	1	YKR060W	YKR060W_mRNA	-29
XI	557666	557689	24	+	4.06276	5.46856	30.3914	0.000164865	0.000608215	Promoter	11	557677	558954	1278	1	YKR061W	YKR061W_mRNA	0
XI	567800	567930	131	+	2.54105	5.81688	17.3135	0.00149378	0.00390372	Promoter	11	567918	570149	2232	1	YKR067W	YKR067W_mRNA	0
XI	579140	579175	36	+	1.92131	6.45538	33.7113	0.000105706	0.000418183	Promoter	11	579209	579676	468	1	YKR074W	YKR074W_mRNA	-34
XI	580759	580811	53	-	-1.84241	8.5641	86.0383	1.25688e-06	1.25657e-05	Promoter	11	579827	580750	924	2	YKR075C	YKR075C_mRNA	-61
XI	582206	582293	88	+	4.73942	9.35631	583.165	4.30098e-11	3.38119e-08	Promoter	11	582283	583395	1113	1	YKR076W	YKR076W_mRNA	0
XI	590313	590337	25	+	-7.86516	5.41764	93.3911	3.68631e-06	2.93098e-05	Promoter	11	590395	591357	963	1	YKR080W	YKR080W_mRNA	-58
XI	592550	592594	45	-	-2.02381	6.93516	83.8867	1.42809e-06	1.36525e-05	Promoter	11	591506	592540	1035	2	YKR081C	YKR081C_mRNA	-54
XI	605403	605447	45	-	-1.00336	6.419	12.2264	0.00479651	0.0105562	Promoter	11	604405	605418	1014	2	YKR088C	YKR088C_mRNA	0
XI	608768	608810	43	+	-1.17383	5.96602	13.2677	0.00369909	0.00845456	Promoter	11	608946	611066	2121	1	YKR090W	YKR090W_mRNA	-136
XI	611425	611518	94	+	1.06997	9.14136	34.857	9.1386e-05	0.000371189	Promoter	11	611525	612265	741	1	YKR091W	YKR091W_mRNA	-7
XI	618730	618840	111	-	-2.72081	7.96878	92.9138	8.5116e-07	9.37046e-06	Promoter	11	617996	618750	755	2	YKR094C	YKR094C_mRNA	0
XI	626503	626583	81	+	2.1762	6.60553	37.2357	6.83309e-05	0.000290018	Promoter	11	626793	630380	3588	1	YKR096W	YKR096W_mRNA	-210
XI	630997	631062	66	+	6.0586	8.09611	291.356	1.97713e-09	1.39431e-07	Promoter	11	631152	632801	1650	1	YKR097W	YKR097W_mRNA	-90
XI	79882	79971	90	-	1.40428	7.55522	56.2655	1.01664e-05	6.50299e-05	Promoter	11	78866	79882	1017	2	YKL193C	YKL193C_mRNA	0
XI	81005	81019	15	+	-7.23303	4.87573	58.1748	2.66408e-05	0.000137762	Promoter	11	81035	82639	1605	1	YKL191W	YKL191W_mRNA	-16
XI	88736	88948	213	-	3.21319	7.64697	120.975	2.18504e-07	3.2896e-06	Promoter	11	86225	88786	2562	2	YKL188C	YKL188C_mRNA	0
XI	91504	91597	94	-	7.54917	8.61809	356.519	6.53995e-10	8.70865e-08	Promoter	11	89284	91536	2253	2	YKL187C	YKL187C_mRNA	0
XI	93310	93357	48	-	-1.12924	7.00002	28.2918	0.000222632	0.000786158	Promoter	11	92744	93298	555	2	YKL186C	YKL186C_mRNA	-59
XII	1001807	1001864	58	-	3.27868	5.4439	19.2815	0.0010088	0.00279687	Promoter	12	1000342	1001703	1362	2	YLR431C	YLR431C_mRNA	-161
XII	1002415	1002507	93	+	-1.08897	7.72979	47.7352	2.20837e-05	0.00011874	Promoter	12	1002557	1004128	1572	1	YLR432W	YLR432W_mRNA	-50
XII	1006285	1006342	58	+	-3.17289	7.26065	126.532	1.72842e-07	2.75725e-06	Promoter	12	1006378	1006995	618	1	YLR435W	YLR435W_mRNA	-36
XII	1011959	1012092	134	-	-1.61738	6.50221	18.1468	0.00126073	0.00337073	Promoter	12	1011622	1012023	402	2	YLR437C	YLR437C_mRNA	0
XII	1012451	1012476	26	+	1.08367	7.39248	21.8584	0.000627104	0.00187438	Promoter	12	1012501	1013775	1275	1	YLR438W	YLR438W_mRNA	-25
XII	1018924	1018949	26	-	-2.5577	8.67581	293.377	1.90385e-09	1.39431e-07	Promoter	12	1018141	1018908	768	2	YLR441C	YLR441C_mRNA	-41
XII	1022240	1022343	104	-	1.63726	6.926	48.9574	1.96274e-05	0.000108285	Promoter	12	1019315	1022251	2937	2	YLR442C	YLR442C_mRNA	0
XII	1027884	1027964	81	-	-1.17938	6.81977	20.8835	0.000747124	0.00217435	Promoter	12	1026856	1027893	1038	2	YLR447C	YLR447C_mRNA	0
XII	1028758	1028901	144	+	-2.63233	8.98416	338.235	8.73338e-10	9.88294e-08	Promoter	12	1028854	1029768	915	1	YLR448W	YLR448W_mRNA	0
XII	1030775	1030825	51	+	-2.08949	8.24926	134.81	1.23997e-07	2.15302e-06	Promoter	12	1030834	1032012	1179	1	YLR449W	YLR449W_mRNA	-9
XII	116294	116370	77	+	1.34577	5.96488	11.0344	0.0065625	0.0138599	Promoter	12	116432	121111	4680	1	YLL015W	YLL015W_mRNA	-62
XII	121291	121324	34	+	-1.06716	7.24533	25.1355	0.000361306	0.001176	Promoter	12	121322	121648	327	1	YLL014W	YLL014W_mRNA	0
XII	125477	125481	5	+	-1.63699	5.28061	14.9051	0.00251672	0.0061079	Promoter	12	125534	127255	1722	1	YLL012W	YLL012W_mRNA	-53
XII	131415	131493	79	-	1.12492	7.8295	38.1915	6.10468e-05	0.000265939	Promoter	12	131205	131414	210	2	YLL009C	YLL009C_mRNA	-79
XII	131658	131729	72	+	-2.66415	8.64075	257.342	3.88968e-09	1.95126e-07	Promoter	12	131729	133987	2259	1	YLL008W	YLL008W_mRNA	0
XII	146253	146293	41	+	-1.99341	5.60161	28.4024	0.000219047	0.000777449	Promoter	12	146291	147601	1311	1	YLL002W	YLL002W_mRNA	0
XII	147823	147866	44	+	1.24355	6.43031	20.6437	0.000780679	0.00225313	Promoter	12	147890	150163	2274	1	YLL001W	YLL001W_mRNA	-24
XII	156335	156435	101	-	-2.30197	7.87749	141.792	9.50614e-08	1.77229e-06	Promoter	12	154343	156334	1992	2	YLR002C	YLR002C_mRNA	-101
XII	157739	157797	59	-	-1.43424	7.90131	76.6256	2.24783e-06	1.9602e-05	Promoter	12	156855	157730	876	2	YLR003C	YLR003C_mRNA	-67
XII	159985	160039	55	+	1.51253	6.83961	34.6486	9.38114e-05	0.000378199	Promoter	12	160049	161434	1386	1	YLR005W	YLR005W_mRNA	-10
XII	166131	166194	64	-	-1.96211	6.12274	35.1273	8.8348e-05	0.000360958	Promoter	12	165577	166083	507	2	YLR008C	YLR008C_mRNA	-111
XII	166349	166445	97	+	-1.86946	7.68404	56.2612	1.01701e-05	6.50299e-05	Promoter	12	166537	167136	600	1	YLR009W	YLR009W_mRNA	-92
XII	177590	177655	66	+	-1.59337	7.36694	70.3475	3.43444e-06	2.80402e-05	Promoter	12	177608	178621	1014	1	YLR017W	YLR017W_mRNA	0
XII	183396	183468	73	-	-1.14524	6.76123	25.3217	0.000350712	0.00114689	Promoter	12	181789	183405	1617	2	YLR020C	YLR020C_mRNA	0
XII	183551	183655	105	+	-1.20899	8.28327	6.73267	0.0244268	0.0425414	Promoter	12	183623	184162	540	1	YLR021W	YLR021W_mRNA	0
XII	184873	184991	119	-	-1.4677	8.28158	86.0448	1.25639e-06	1.25657e-05	Promoter	12	184174	184926	753	2	YLR022C	YLR022C_mRNA	0
XII	187198	187212	15	-	-1.24515	5.07704	8.99448	0.0117539	0.0227476	Promoter	12	185498	187129	1632	2	YLR023C	YLR023C_mRNA	-83
XII	193453	193477	25	-	2.23167	5.19499	12.4341	0.00454981	0.0101139	Promoter	12	187663	193281	5619	2	YLR024C	YLR024C_mRNA	-196
XII	201341	201547	207	-	1.22731	8.53572	47.113	2.34723e-05	0.000124148	Promoter	12	199540	201315	1776	2	YLR028C	YLR028C_mRNA	-232
XII	202392	202648	257	-	-2.54614	9.99715	371.267	5.23284e-10	8.29424e-08	Promoter	12	201976	202590	615	2	YLR029C	YLR029C_mRNA	0
XII	204909	204983	75	+	1.99346	5.59182	20.6712	0.000776739	0.00224386	Promoter	12	204991	208500	3510	1	YLR032W	YLR032W_mRNA	-8
XII	21761	21830	70	-	9.18171	6.92639	242.674	5.50144e-08	1.15388e-06	Promoter	12	21138	21839	702	2	YLL060C	YLL060C_mRNA	78
XII	225181	225266	86	-	1.84196	8.57335	86.83	1.20004e-06	1.22676e-05	Promoter	12	224921	225172	252	2	YLR038C	YLR038C_mRNA	-94
XII	229638	229728	91	-	-2.40487	5.27007	14.1684	0.00298289	0.00706314	Promoter	12	228908	229582	675	2	YLR040C	YLR040C_mRNA	-146
XII	230468	230549	82	-	-2.86764	6.47686	12.6562	0.00430234	0.00963422	Promoter	12	229966	230451	486	2	YLR042C	YLR042C_mRNA	-98
XII	233937	234153	217	-	-1.46775	10.3075	93.3184	8.32541e-07	9.23413e-06	Promoter	12	232390	234081	1692	2	YLR044C	YLR044C_mRNA	0
XII	242128	242226	99	+	-2.92979	9.65229	359.685	6.22961e-10	8.66094e-08	Promoter	12	242232	243349	1118	1	YLR048W	YLR048W_mRNA	-6
XII	246950	247028	79	-	-1.08665	9.07877	57.739	8.98229e-06	5.92247e-05	Promoter	12	246324	246977	654	2	YLR051C	YLR051C_mRNA	0
XII	248351	248480	130	-	5.1265	7.23446	101.597	5.39101e-07	6.59112e-06	Promoter	12	248100	248426	327	2	YLR053C	YLR053C_mRNA	0
XII	253776	253804	29	+	-1.66711	7.22509	51.3209	1.57317e-05	9.09849e-05	Promoter	12	253861	254958	1098	1	YLR056W	YLR056W_mRNA	-57
XII	259430	259508	79	-	-2.7054	7.30856	67.7345	4.13753e-06	3.21104e-05	Promoter	12	257992	259401	1410	2	YLR058C	YLR058C_mRNA	-107
XII	260915	260971	57	+	-2.23265	7.9743	98.4566	6.3323e-07	7.38272e-06	Promoter	12	260979	262766	1788	1	YLR060W	YLR060W_mRNA	-8
XII	263123	263186	64	+	-2.48082	9.67814	204.774	1.33971e-08	4.43472e-07	Promoter	12	263194	263948	755	1	YLR061W	YLR061W_mRNA	-8
XII	266912	266979	68	-	-1.18471	8.00067	52.4974	1.41356e-05	8.35768e-05	Promoter	12	266373	266918	546	2	YLR065C	YLR065C_mRNA	0
XII	270932	271008	77	+	-1.03018	9.66651	62.0408	6.35053e-06	4.55106e-05	Promoter	12	271008	271463	456	1	YLR068W	YLR068W_mRNA	0
XII	278617	278659	43	-	-1.12259	5.61015	10.0601	0.00860066	0.0174742	Promoter	12	275378	278626	3249	2	YLR071C	YLR071C_mRNA	0
XII	281699	281782	84	-	-3.67941	5.6103	40.7996	4.53799e-05	0.000209881	Promoter	12	281019	281621	603	2	YLR073C	YLR073C_mRNA	-161
XII	282478	282527	50	-	-1.03736	8.4323	37.2713	6.8042e-05	0.000289416	Promoter	12	281956	282456	501	2	YLR074C	YLR074C_mRNA	-71
XII	282869	282919	51	+	-1.64289	9.07157	117.243	2.57207e-07	3.6703e-06	Promoter	12	282927	283592	666	1	YLR075W	YLR075W_mRNA	-8
XII	287918	287993	76	+	2.95485	6.89643	97.1458	6.78169e-07	7.78295e-06	Promoter	12	287916	289250	1335	1	YLR080W	YLR080W_mRNA	2
XII	296182	296263	82	-	-2.93678	6.03439	59.2439	7.93696e-06	5.42433e-05	Promoter	12	294091	296094	2004	2	YLR083C	YLR083C_mRNA	-169
XII	341610	341614	5	+	7.13227	5.1186	54.2183	3.5443e-05	0.000171778	Promoter	12	341810	342853	1044	1	YLR100W	YLR100W_mRNA	-196
XII	346541	346585	45	+	1.18829	7.03232	20.6986	0.000772844	0.00223982	Promoter	12	346585	346980	396	1	YLR104W	YLR104W_mRNA	0
XII	363833	363893	61	-	-4.27257	5.28446	29.5008	0.000186904	0.0006777	Promoter	12	349006	363738	14733	2	YLR106C	YLR106C_mRNA	-155
XII	384492	384591	100	-	1.68591	8.20743	78.9424	1.93718e-06	1.76193e-05	Promoter	12	382471	384534	2064	2	YLR117C	YLR117C_mRNA	0
XII	388253	388335	83	-	1.37706	7.80664	38.2466	6.06552e-05	0.000265421	Promoter	12	386511	388220	1710	2	YLR120C	YLR120C_mRNA	-115
XII	395550	395599	50	-	1.32876	5.79363	9.59015	0.00984874	0.019649	Promoter	12	394765	395520	756	2	YLR126C	YLR126C_mRNA	-79
XII	416677	416742	66	-	1.41517	8.91279	31.8802	0.000134485	0.000510057	Promoter	12	415801	416658	858	2	YLR136C	YLR136C_mRNA	-84
XII	425146	425172	27	+	2.19234	6.07837	32.797	0.000119057	0.000459786	Promoter	12	425186	426616	1431	1	YLR142W	YLR142W_mRNA	-14
XII	433755	433770	16	-	-1.46401	5.0561	10.2347	0.00818551	0.016756	Promoter	12	432823	433725	903	2	YLR146C	YLR146C_mRNA	-45
XII	439867	439914	48	-	1.44272	7.13351	38.4934	5.8939e-05	0.000259076	Promoter	12	437631	439823	2193	2	YLR149C	YLR149C_mRNA	-91
XII	440279	440449	171	+	-2.10636	9.91308	117.797	2.50975e-07	3.60249e-06	Promoter	12	440467	441288	822	1	YLR150W	YLR150W_mRNA	-18
XII	442711	442760	50	-	2.59142	6.71364	63.3808	5.72444e-06	4.15748e-05	Promoter	12	441715	442737	1023	2	YLR151C	YLR151C_mRNA	0
XII	453304	454533	1230	-	1.09044	11.1354	10.3231	0.00798446	0.0163934	Promoter	12	454392	454556	165	1	YLR154W-B	YLR154W-B_mRNA	0
XII	459384	459685	302	-	1.95459	10.3598	110.559	3.48705e-07	4.69356e-06	Promoter	12	459676	459796	121	1	RDN5-1	RDN5-1_rRNA	0
XII	48621	48710	90	-	-2.58715	9.52437	323.268	1.11945e-09	1.07712e-07	Promoter	12	47859	48629	771	2	YLL045C	YLL045C_mRNA	0
XII	493832	493888	57	+	7.9313	5.81	98.2099	2.9719e-06	2.49336e-05	Promoter	12	493883	494389	507	1	YLR164W	YLR164W_mRNA	0
XII	498841	498962	122	+	-2.56769	10.0491	240.806	5.57905e-09	2.39867e-07	Promoter	12	498947	499405	459	1	YLR167W	YLR167W_mRNA	0
XII	504521	504590	70	+	10.7208	8.36118	322.031	1.53078e-08	4.77486e-07	Promoter	12	504591	505829	1239	1	YLR174W	YLR174W_mRNA	-1
XII	513832	513856	25	-	1.3895	8.51616	100.518	5.69443e-07	6.8757e-06	Promoter	12	513162	513821	660	2	YLR178C	YLR178C_mRNA	-35
XII	514768	514796	29	-	-3.21655	6.17051	33.4008	0.000110033	0.000430749	Promoter	12	514108	514713	606	2	YLR179C	YLR179C_mRNA	-83
XII	515175	515226	52	+	-5.17268	7.93086	522.821	7.88906e-11	3.48983e-08	Promoter	12	515262	516410	1149	1	YLR180W	YLR180W_mRNA	-36
XII	522614	522720	107	+	-2.11096	9.21038	246.044	4.96425e-09	2.27887e-07	Promoter	12	522663	523288	626	1	YLR185W	YLR185W_mRNA	0
XII	523559	523604	46	+	-2.02806	6.77141	66.4721	4.53729e-06	3.42301e-05	Promoter	12	523632	524390	759	1	YLR186W	YLR186W_mRNA	-28
XII	53863	54021	159	-	1.22898	9.24146	29.5014	0.000186887	0.0006777	Promoter	12	53131	53931	801	2	YLL041C	YLL041C_mRNA	0
XII	540537	540616	80	-	1.0981	6.9833	16.7886	0.00166676	0.00428759	Promoter	12	540009	540536	528	2	YLR193C	YLR193C_mRNA	-80
XII	543295	543353	59	-	-1.01154	7.84737	20.713	0.000770797	0.00223599	Promoter	12	541937	543304	1368	2	YLR195C	YLR195C_mRNA	0
XII	543884	543945	62	+	-2.38219	6.84109	49.1523	1.92663e-05	0.000106732	Promoter	12	543968	545698	1731	1	YLR196W	YLR196W_mRNA	-23
XII	546041	546078	38	+	-3.57796	7.38932	225.875	7.89105e-09	3.02345e-07	Promoter	12	546097	547611	1515	1	YLR197W	YLR197W_mRNA	-19
XII	553683	553769	87	-	4.41924	8.24657	205.551	1.31268e-08	4.40516e-07	Promoter	12	552724	553677	954	2	YLR205C	YLR205C_mRNA	-92
XII	554392	554485	94	+	1.26983	7.29455	25.8374	0.000323233	0.00107509	Promoter	12	554578	556419	1842	1	YLR206W	YLR206W_mRNA	-93
XII	564581	564589	9	-	2.54857	5.26382	17.0417	0.00158055	0.00409528	Promoter	12	563792	564531	740	2	YLR211C	YLR211C_mRNA	-58
XII	581778	581821	44	-	-1.88072	6.81895	45.4677	2.76698e-05	0.000141579	Promoter	12	579318	581771	2454	2	YLR222C	YLR222C_mRNA	-50
XII	586308	586366	59	+	-1.65811	6.19401	8.79679	0.0124809	0.0239763	Promoter	12	586464	587573	1110	1	YLR224W	YLR224W_mRNA	-98
XII	604941	605005	65	-	-1.05299	7.19653	18.4888	0.00117768	0.00317662	Promoter	12	604212	604787	576	2	YLR229C	YLR229C_mRNA	-218
XII	614654	614705	52	+	1.26723	6.66462	22.7429	0.000537463	0.00165316	Promoter	12	614755	616191	1437	1	YLR238W	YLR238W_mRNA	-50
XII	620405	620468	64	+	1.29049	6.5912	20.3048	0.000831173	0.00237494	Promoter	12	620473	622821	2349	1	YLR241W	YLR241W_mRNA	-5
XII	626336	626375	40	-	-1.62305	6.95258	54.187	1.21645e-05	7.4269e-05	Promoter	12	625168	626331	1164	2	YLR244C	YLR244C_mRNA	-44
XII	626931	626971	41	-	-1.09164	5.8855	10.6657	0.00725819	0.0151495	Promoter	12	626502	626930	429	2	YLR245C	YLR245C_mRNA	-41
XII	636727	636766	40	+	-2.64745	7.95795	186.582	2.20839e-08	6.16185e-07	Promoter	12	636780	639914	3135	1	YLR249W	YLR249W_mRNA	-14
XII	63708	63760	53	-	1.23969	7.64222	43.0419	3.55879e-05	0.000172196	Promoter	12	54211	63645	9435	2	YLL040C	YLL040C_mRNA	-115
XII	644995	645111	117	-	1.49406	7.09121	41.9084	4.01878e-05	0.00019025	Promoter	12	644404	644973	570	2	YLR254C	YLR254C_mRNA	-138
XII	65256	65321	66	-	1.86043	9.20758	154.178	6.10568e-08	1.2536e-06	Promoter	12	64062	65207	1146	2	YLL039C	YLL039C_mRNA	-114
XII	678142	678205	64	+	1.87344	7.32228	74.7488	2.5431e-06	2.1742e-05	Promoter	12	678212	679924	1713	1	YLR267W	YLR267W_mRNA	-7
XII	681068	681123	56	+	2.28691	8.06096	146.475	8.0079e-08	1.53237e-06	Promoter	12	681186	682238	1053	1	YLR270W	YLR270W_mRNA	-63
XII	682564	682622	59	+	1.09602	7.46134	30.293	0.000167143	0.000615219	Promoter	12	682737	683561	825	1	YLR271W	YLR271W_mRNA	-115
XII	696860	696967	108	-	-2.17641	7.1858	99.0639	6.13605e-07	7.24709e-06	Promoter	12	695046	696830	1785	2	YLR276C	YLR276C_mRNA	-137
XII	705063	705188	126	+	1.10317	6.94045	9.75233	0.00939515	0.0188523	Promoter	12	705186	706130	945	1	YLR283W	YLR283W_mRNA	0
XII	707038	707136	99	-	3.0121	7.13161	121.888	2.10107e-07	3.18498e-06	Promoter	12	706198	707040	843	2	YLR284C	YLR284C_mRNA	0
XII	713102	713224	123	-	-1.00321	9.37906	56.5127	9.9555e-06	6.42487e-05	Promoter	12	712537	713158	622	2	YLR287C-A	YLR287C-A_mRNA	0
XII	721370	721528	159	-	-3.20817	8.85405	354.478	6.74967e-10	8.70865e-08	Promoter	12	720771	721430	660	2	YLR293C	YLR293C_mRNA	0
XII	722331	722478	148	-	1.10276	9.07347	65.7016	4.8036e-06	3.61272e-05	Promoter	12	721999	722373	375	2	YLR295C	YLR295C_mRNA	0
XII	73166	73211	46	-	-2.02682	7.24222	95.4525	7.41899e-07	8.37606e-06	Promoter	12	70633	73146	2514	2	YLL034C	YLL034C_mRNA	-65
XII	737508	737632	125	-	1.92323	8.88914	128.169	1.61603e-07	2.6125e-06	Promoter	12	735212	737548	2337	2	YLR304C	YLR304C_mRNA	0
XII	747132	747257	126	-	10.4597	8.11488	540.145	1.44388e-09	1.25463e-07	Promoter	12	746848	747111	264	2	YLR307C-A	YLR307C-A_mRNA	-146
XII	764140	764216	77	-	-1.76786	8.33626	103.691	4.85425e-07	6.10357e-06	Promoter	12	762575	764137	1563	2	YLR314C	YLR314C_mRNA	-79
XII	778903	778988	86	-	6.84319	4.88777	45.3825	7.20133e-05	0.000302605	Promoter	12	778173	778952	780	2	YLR323C	YLR323C_mRNA	0
XII	779144	779193	50	+	1.03792	6.17024	8.17709	0.0151329	0.028311	Promoter	12	779215	780786	1572	1	YLR324W	YLR324W_mRNA	-22
XII	781310	781486	177	-	-1.42209	9.67468	58.3191	8.56119e-06	5.66786e-05	Promoter	12	781143	781379	237	2	YLR325C	YLR325C_mRNA	0
XII	805812	805900	89	+	-2.19481	8.34682	171.272	3.49061e-08	8.2453e-07	Promoter	12	805887	806825	939	1	YLR340W	YLR340W_mRNA	0
XII	819267	819314	48	+	-3.50335	6.94541	62.8109	5.98138e-06	4.32473e-05	Promoter	12	819312	820142	831	1	YLR344W	YLR344W_mRNA	0
XII	820392	820511	120	+	1.33892	7.92486	54.8889	1.14419e-05	7.11065e-05	Promoter	12	820511	822040	1530	1	YLR345W	YLR345W_mRNA	0
XII	822624	822669	46	-	6.78268	4.84101	43.6491	8.38958e-05	0.000345086	Promoter	12	822287	822592	306	2	YLR346C	YLR346C_mRNA	-77
XII	830933	831016	84	+	1.25403	7.14991	24.174	0.000422395	0.0013425	Promoter	12	831116	833539	2424	1	YLR352W	YLR352W_mRNA	-100
XII	839313	839340	28	-	-1.46792	7.61841	58.7138	8.28792e-06	5.58574e-05	Promoter	12	838066	839253	1188	2	YLR355C	YLR355C_mRNA	-87
XII	840232	840313	82	+	1.91976	7.96423	98.5464	6.30282e-07	7.37248e-06	Promoter	12	840321	840914	594	1	YLR356W	YLR356W_mRNA	-8
XII	844166	844264	99	+	-2.84261	7.15683	136.56	1.15869e-07	2.04282e-06	Promoter	12	844282	845730	1449	1	YLR359W	YLR359W_mRNA	-18
XII	849820	849850	31	+	3.4997	5.03987	19.3912	0.000987738	0.00275119	Promoter	12	849866	852019	2154	1	YLR362W	YLR362W_mRNA	-16
XII	853423	853451	29	+	-1.86597	5.83972	19.0842	0.00104799	0.00287837	Promoter	12	853461	853718	258	1	YLR363W-A	YLR363W-A_mRNA	-10
XII	867205	867218	14	+	-3.59038	5.91014	48.6705	2.01738e-05	0.000110922	Promoter	12	867354	868391	1038	1	YLR372W	YLR372W_mRNA	-136
XII	87159	87205	47	+	-1.03532	7.39454	25.1406	0.000361011	0.00117582	Promoter	12	87403	88155	753	1	YLL027W	YLL027W_mRNA	-198
XII	871646	871692	47	+	-1.24513	6.58543	24.8499	0.000378296	0.00122393	Promoter	12	871697	872728	1032	1	YLR375W	YLR375W_mRNA	-5
XII	874828	874833	6	-	7.05983	5.07115	54.7049	3.41871e-05	0.000167023	Promoter	12	873746	874792	1047	2	YLR377C	YLR377C_mRNA	-41
XII	877374	877388	15	-	1.38421	5.93151	17.9895	0.00130124	0.00346761	Promoter	12	875736	877178	1443	2	YLR378C	YLR378C_mRNA	-210
XII	892871	892894	24	-	-2.51559	6.51019	74.4287	2.59791e-06	2.20618e-05	Promoter	12	888851	892900	4050	2	YLR384C	YLR384C_mRNA	29
XII	909983	910075	93	-	1.11626	8.17235	51.3121	1.57443e-05	9.09849e-05	Promoter	12	909729	909965	237	2	YLR395C	YLR395C_mRNA	-110
XII	914908	914924	17	-	-2.17479	5.88836	26.2249	0.000304242	0.00102524	Promoter	12	912550	914892	2343	2	YLR397C	YLR397C_mRNA	-32
XII	924436	924519	84	-	-1.55067	7.97088	57.3711	9.26199e-06	6.09038e-05	Promoter	12	922442	924448	2007	2	YLR401C	YLR401C_mRNA	0
XII	929766	929791	26	+	-1.17648	5.19917	7.35699	0.0197523	0.035757	Promoter	12	929789	930892	1104	1	YLR405W	YLR405W_mRNA	0
XII	931749	931846	98	-	-2.58547	9.18506	264.718	3.3353e-09	1.76789e-07	Promoter	12	931065	931755	691	2	YLR406C	YLR406C_mRNA	0
XII	937266	937297	32	-	-4.61902	5.21601	42.9582	3.59053e-05	0.000173309	Promoter	12	934414	937233	2820	2	YLR409C	YLR409C_mRNA	-64
XII	951098	951153	56	+	-10.5722	8.07421	696.827	4.47957e-10	8.29424e-08	Promoter	12	951156	953183	2028	1	YLR413W	YLR413W_mRNA	-3
XII	963680	963787	108	+	-1.43152	8.34109	45.309	2.81194e-05	0.000142768	Promoter	12	963785	964879	1095	1	YLR420W	YLR420W_mRNA	0
XII	97296	97643	348	-	-2.36411	10.0901	214.26	1.04956e-08	3.72787e-07	Promoter	12	95566	97485	1920	2	YLL024C	YLL024C_mRNA	0
XII	98852	98928	77	-	1.22335	7.25202	22.8722	0.000525664	0.00162096	Promoter	12	97997	98836	840	2	YLL023C	YLL023C_mRNA	-92
XII	990866	990989	124	+	3.30707	7.37809	124.078	1.91468e-07	2.93907e-06	Promoter	12	990617	990961	345	2	YLR428C	YLR428C_mRNA	0
XIII	10137	10166	30	+	4.18583	7.5836	284.875	2.23554e-09	1.47002e-07	Promoter	13	10198	11295	1098	1	YML131W	YML131W_mRNA	-32
XIII	104160	104242	83	-	1.98211	8.68198	186.264	2.2287e-08	6.16185e-07	Promoter	13	103983	104162	180	2	YML081C-A	YML081C-A_mRNA	0
XIII	104628	104685	58	+	-1.01954	7.45316	16.3511	0.00182922	0.00463351	Promoter	13	104777	108532	3756	1	YML081W	YML081W_mRNA	-92
XIII	108682	108709	28	+	-1.97317	4.71597	10.0025	0.0087431	0.017734	Promoter	13	108806	110077	1272	1	YML080W	YML080W_mRNA	-97
XIII	110972	111002	31	+	1.65304	5.45477	13.4561	0.00353379	0.00812638	Promoter	13	111002	111550	549	1	YML078W	YML078W_mRNA	0
XIII	111811	111860	50	+	-1.51327	6.7422	24.3028	0.000413541	0.00132121	Promoter	13	111865	112344	480	1	YML077W	YML077W_mRNA	-5
XIII	124132	124224	93	-	-2.85297	8.82011	274.758	2.72305e-09	1.6159e-07	Promoter	13	123227	124172	946	2	YML073C	YML073C_mRNA	0
XIII	131595	131711	117	-	-2.06393	7.47216	61.1431	6.81518e-06	4.80611e-05	Promoter	13	129749	131572	1824	2	YML071C	YML071C_mRNA	-139
XIII	13179	13218	40	-	2.39371	7.55823	21.9795	0.000613849	0.00184041	Promoter	13	11483	13174	1692	2	YML130C	YML130C_mRNA	-44
XIII	13266	13287	22	-	-7.66777	5.24357	90.591	4.1977e-06	3.23196e-05	Promoter	13	11483	13174	1692	2	YML130C	YML130C_mRNA	-113
XIII	137441	137505	65	+	1.86862	5.19333	7.90008	0.0165327	0.0306237	Promoter	13	137550	138944	1395	1	YML068W	YML068W_mRNA	-45
XIII	146405	146482	78	+	-2.21921	8.59688	150.096	7.03786e-08	1.40353e-06	Promoter	13	146482	147249	768	1	YML063W	YML063W_mRNA	0
XIII	164220	164299	80	-	-8.55882	6.05649	143.029	5.79713e-07	6.98239e-06	Promoter	13	162194	164176	1983	2	YML056C	YML056C_mRNA	-123
XIII	164576	164625	50	+	-7.01467	4.68803	50.9731	4.54181e-05	0.000209881	Promoter	13	164790	165326	537	1	YML055W	YML055W_mRNA	-165
XIII	16687	16748	62	-	2.54944	8.98203	301.462	1.64091e-09	1.35376e-07	Promoter	13	15135	16676	1542	2	YML128C	YML128C_mRNA	-72
XIII	167309	167357	49	-	10.5814	8.23275	519.599	1.72489e-09	1.35376e-07	Promoter	13	165533	167308	1776	2	YML054C	YML054C_mRNA	-49
XIII	170356	170394	39	+	-1.85474	6.71361	25.8514	0.000322524	0.00107346	Promoter	13	170402	171310	909	1	YML052W	YML052W_mRNA	-8
XIII	192634	192844	211	+	7.18498	8.27883	165.367	4.2082e-08	9.56873e-07	Promoter	13	192788	194800	2013	1	YML042W	YML042W_mRNA	0
XIII	205595	205624	30	+	-1.11693	6.38269	16.5281	0.00176133	0.00449431	Promoter	13	205642	206293	652	1	YML036W	YML036W_mRNA	-18
XIII	213876	213986	111	-	1.40898	7.91412	31.5119	0.000141339	0.00053273	Promoter	13	212515	213930	1416	2	YML032C	YML032C_mRNA	0
XIII	216483	216648	166	+	2.62027	6.14941	30.1781	0.00016985	0.000624128	Promoter	13	216435	216914	480	1	YML030W	YML030W_mRNA	48
XIII	217241	217362	122	+	1.26117	8.21829	41.4471	4.2258e-05	0.000197151	Promoter	13	217362	219878	2517	1	YML029W	YML029W_mRNA	0
XIII	220069	220522	454	+	1.20511	10.4995	48.2484	2.10106e-05	0.000113723	Promoter	13	220138	220728	591	1	YML028W	YML028W_mRNA	0
XIII	221317	221345	29	+	-1.4454	5.70161	17.4998	0.00143753	0.00377043	Promoter	13	221406	222563	1158	1	YML027W	YML027W_mRNA	-61
XIII	223794	223909	116	-	-2.4077	9.76621	227.144	7.65554e-09	2.98015e-07	Promoter	13	222987	223828	842	2	YML026C	YML026C_mRNA	0
XIII	225831	225886	56	+	-2.38324	8.72059	235.198	6.33939e-09	2.61419e-07	Promoter	13	225889	226697	809	1	YML024W	YML024W_mRNA	-3
XIII	228868	228918	51	+	-1.93338	6.10003	32.1143	0.000130331	0.000497016	Promoter	13	228937	229500	564	1	YML022W	YML022W_mRNA	-19
XIII	233419	233469	51	+	-1.29467	7.50522	51.9577	1.48428e-05	8.69136e-05	Promoter	13	233457	234455	999	1	YML019W	YML019W_mRNA	0
XIII	23694	23710	17	-	-1.08536	7.15153	11.8486	0.00528733	0.011496	Promoter	13	22048	23683	1636	2	YML124C	YML124C_mRNA	-27
XIII	243184	243217	34	+	-1.32221	5.28042	9.16101	0.0111803	0.0218136	Promoter	13	243225	244064	840	1	YML014W	YML014W_mRNA	-8
XIII	251542	251571	30	-	1.6397	6.69663	33.3027	0.000111442	0.000433821	Promoter	13	251304	251516	213	2	YML009C	YML009C_mRNA	-55
XIII	253679	253986	308	+	1.60723	9.69421	53.1768	1.33008e-05	7.99036e-05	Promoter	13	253848	255800	1953	1	YML007W	YML007W_mRNA	0
XIII	262659	262717	59	-	1.32004	9.2686	68.0456	4.04548e-06	3.16484e-05	Promoter	13	261705	262685	981	2	YML004C	YML004C_mRNA	0
XIII	271484	271528	45	-	-2.58174	5.99765	45.9823	2.62682e-05	0.00013598	Promoter	13	271347	271577	231	2	YMR001C-A	YMR001C-A_mRNA	93
XIII	288035	288054	20	+	-2.42846	6.63187	86.1123	1.25143e-06	1.25657e-05	Promoter	13	288079	289704	1626	1	YMR011W	YMR011W_mRNA	-25
XIII	29830	29897	68	-	1.81045	7.55858	76.6725	2.24097e-06	1.95773e-05	Promoter	13	28266	29807	1542	2	YML120C	YML120C_mRNA	-90
XIII	30575	30591	17	+	-1.82379	5.66191	19.409	0.00098438	0.00274341	Promoter	13	30611	31684	1074	1	YML119W	YML119W_mRNA	-20
XIII	310179	310210	32	+	6.96812	5.00483	45.9861	6.83622e-05	0.000290018	Promoter	13	310208	311752	1545	1	YMR018W	YMR018W_mRNA	0
XIII	315232	315410	179	+	1.18029	7.72269	36.9224	7.09375e-05	0.000298859	Promoter	13	315377	316903	1527	1	YMR020W	YMR020W_mRNA	0
XIII	32198	32291	94	+	3.32664	6.04804	32.6107	0.000122015	0.000470838	Promoter	13	32334	33851	1518	1	YML118W	YML118W_mRNA	-43
XIII	350289	350413	125	+	3.56437	6.37679	38.0859	6.18047e-05	0.000267802	Promoter	13	350381	350863	483	1	YMR040W	YMR040W_mRNA	0
XIII	351967	352216	250	-	1.41114	9.32507	102.989	5.02689e-07	6.27201e-06	Promoter	13	350966	351973	1008	2	YMR041C	YMR041C_mRNA	0
XIII	362641	362698	58	-	-1.21763	9.09208	87.0415	1.18537e-06	1.21909e-05	Promoter	13	357359	362627	5269	2	YMR045C	YMR045C	-71
XIII	370515	370577	63	-	-1.29541	8.07994	40.0495	4.9342e-05	0.000225656	Promoter	13	368094	370517	2424	2	YMR049C	YMR049C_mRNA	0
XIII	382872	382925	54	-	2.26153	6.05949	25.9632	0.00031692	0.00105916	Promoter	13	380346	382898	2553	2	YMR053C	YMR053C_mRNA	0
XIII	388298	388325	28	-	6.74345	4.81431	42.2287	9.54479e-05	0.000383842	Promoter	13	387315	388244	930	2	YMR056C	YMR056C_mRNA	-81
XIII	396384	396460	77	-	-2.61427	5.93677	21.4269	0.000677183	0.00200314	Promoter	13	395054	396379	1326	2	YMR062C	YMR062C_mRNA	-81
XIII	424919	424973	55	+	-1.04711	8.30312	39.1586	5.45894e-05	0.000244147	Promoter	13	424989	426059	1071	1	YMR079W	YMR079W_mRNA	-16
XIII	439119	439198	80	+	1.71234	6.04437	26.8491	0.000276352	0.00094566	Promoter	13	439208	442090	2883	1	YMR086W	YMR086W_mRNA	-10
XIII	43992	44040	49	+	-1.22671	5.59921	6.963	0.0225625	0.0397787	Promoter	13	44045	44791	747	1	YML113W	YML113W_mRNA	-5
XIII	442469	442513	45	+	-1.60976	5.08079	11.5652	0.00569483	0.0122453	Promoter	13	442527	443381	855	1	YMR087W	YMR087W_mRNA	-14
XIII	448087	448158	72	-	2.15576	7.14043	79.1186	1.91569e-06	1.74892e-05	Promoter	13	445609	448086	2478	2	YMR089C	YMR089C_mRNA	-72
XIII	449132	449272	141	+	4.03502	8.59308	495.524	1.06209e-10	3.69152e-08	Promoter	13	449245	449928	684	1	YMR090W	YMR090W_mRNA	0
XIII	453495	453561	67	-	2.59338	5.09839	14.7894	0.00258389	0.00625045	Promoter	13	451632	453479	1848	2	YMR092C	YMR092C_mRNA	-82
XIII	453965	454017	53	+	-2.36293	6.6829	77.4504	2.13095e-06	1.87997e-05	Promoter	13	454015	455556	1542	1	YMR093W	YMR093W_mRNA	0
XIII	458358	458402	45	+	4.10579	7.504	145.019	8.44181e-08	1.59216e-06	Promoter	13	458408	459301	894	1	YMR096W	YMR096W_mRNA	-6
XIII	475402	475536	135	-	1.28447	7.93778	50.0398	1.7717e-05	9.94358e-05	Promoter	13	473420	475453	2034	2	YMR104C	YMR104C_mRNA	0
XIII	482964	483064	101	+	5.0516	9.72546	609.055	3.37796e-11	3.38119e-08	Promoter	13	483014	483361	348	1	YMR107W	YMR107W_mRNA	0
XIII	483823	483909	87	+	-1.6489	7.24482	45.4727	2.76556e-05	0.000141579	Promoter	13	484084	486147	2064	1	YMR108W	YMR108W_mRNA	-175
XIII	491983	492054	72	-	1.11256	8.27209	56.6724	9.82194e-06	6.34709e-05	Promoter	13	490394	491992	1599	2	YMR110C	YMR110C_mRNA	0
XIII	497445	497529	85	-	1.76186	7.32401	54.898	1.14329e-05	7.11065e-05	Promoter	13	496343	497449	1107	2	YMR114C	YMR114C_mRNA	0
XIII	500683	500718	36	-	-4.69287	6.8212	84.6304	1.36597e-06	1.32937e-05	Promoter	13	499456	500688	1233	2	YMR116C	YMR116C_mRNA	0
XIII	502749	502823	75	-	8.42271	6.23073	125.336	1.03399e-06	1.09008e-05	Promoter	13	502144	502734	591	2	YMR118C	YMR118C_mRNA	-89
XIII	509302	509334	33	-	-4.80664	5.36998	41.0542	4.41212e-05	0.000204276	Promoter	13	507502	509280	1779	2	YMR120C	YMR120C_mRNA	-54
XIII	511262	511296	35	+	1.50312	7.81785	56.4118	1.00409e-05	6.4543e-05	Promoter	13	511315	511569	255	1	YMR122W-A	YMR122W-A_mRNA	-19
XIII	523635	523678	44	+	-2.1986	7.85918	122.025	2.08876e-07	3.17622e-06	Promoter	13	523696	527499	3804	1	YMR128W	YMR128W_mRNA	-18
XIII	532026	532077	52	+	-1.49114	5.47748	12.563	0.00440419	0.00982614	Promoter	13	532119	533027	909	1	YMR130W	YMR130W_mRNA	-42
XIII	534699	534773	75	-	-1.96488	7.92119	84.2721	1.3955e-06	1.34732e-05	Promoter	13	533163	534698	1536	2	YMR131C	YMR131C_mRNA	-75
XIII	535603	535657	55	-	-2.98633	5.64909	55.4134	1.09349e-05	6.85687e-05	Promoter	13	534944	535570	627	2	YMR132C	YMR132C_mRNA	-87
XIII	539987	540112	126	-	1.52087	8.88261	98.1587	6.43127e-07	7.43339e-06	Promoter	13	538689	540056	1368	2	YMR135C	YMR135C_mRNA	0
XIII	544975	545047	73	-	1.0257	6.65108	8.96491	0.0118593	0.0228907	Promoter	13	542978	544963	1986	2	YMR137C	YMR137C_mRNA	-84
XIII	545895	545958	64	+	1.13593	7.46117	23.3281	0.000486429	0.00151923	Promoter	13	546125	547237	1113	1	YMR139W	YMR139W_mRNA	-167
XIII	551191	551259	69	-	-2.50684	9.51361	196.872	1.65558e-08	5.0667e-07	Promoter	13	550206	551207	1002	2	YMR142C	YMR142C_mRNA	0
XIII	551862	551933	72	+	-2.67154	9.11694	230.709	7.03671e-09	2.80661e-07	Promoter	13	551928	552903	976	1	YMR143W	YMR143W_mRNA	0
XIII	556449	556615	167	-	2.66923	7.65195	103.069	5.00685e-07	6.26307e-06	Promoter	13	554793	556475	1683	2	YMR145C	YMR145C_mRNA	0
XIII	558531	558623	93	-	-1.44282	9.29188	107.99	3.93755e-07	5.22073e-06	Promoter	13	557481	558524	1044	2	YMR146C	YMR146C_mRNA	-99
XIII	559094	559198	105	+	1.58488	6.73624	24.315	0.000412718	0.00131982	Promoter	13	559199	559870	672	1	YMR147W	YMR147W_mRNA	-1
XIII	563013	563105	93	+	1.50378	7.2673	51.0538	1.61231e-05	9.26269e-05	Promoter	13	563096	564193	1098	1	YMR152W	YMR152W_mRNA	0
XIII	56465	56584	120	+	-2.53476	6.51469	67.6259	4.17024e-06	3.22538e-05	Promoter	13	56773	57453	681	1	YML106W	YML106W_mRNA	-189
XIII	571014	571046	33	-	1.45127	6.47435	22.1852	0.000592063	0.0017924	Promoter	13	570300	571016	717	2	YMR156C	YMR156C_mRNA	0
XIII	584053	584118	66	-	1.67321	5.75334	18.2385	0.00123781	0.00331855	Promoter	13	578951	583921	4971	2	YMR162C	YMR162C_mRNA	-197
XIII	600881	600966	86	-	3.10163	8.63327	172.442	3.36604e-08	8.1085e-07	Promoter	13	599352	600872	1521	2	YMR169C	YMR169C_mRNA	-94
XIII	603091	603123	33	-	2.40205	7.38181	50.6448	1.67447e-05	9.51868e-05	Promoter	13	601562	603082	1521	2	YMR170C	YMR170C_mRNA	-41
XIII	610368	610413	46	-	4.6416	8.51578	604.88	3.50972e-11	3.38119e-08	Promoter	13	610159	610365	207	2	YMR174C	YMR174C_mRNA	-48
XIII	610700	611110	411	+	7.60282	9.57353	545.168	6.25373e-11	3.38119e-08	Promoter	13	611016	611255	240	1	YMR175W	YMR175W_mRNA	0
XIII	611625	611638	14	+	-1.26111	5.17911	8.77602	0.0125603	0.0241099	Promoter	13	611740	615975	4236	1	YMR176W	YMR176W_mRNA	-102
XIII	623867	624143	277	-	2.32215	7.76355	99.0049	6.15479e-07	7.25162e-06	Promoter	13	623616	624080	465	2	YMR181C	YMR181C_mRNA	0
XIII	628115	628217	103	+	2.76491	7.61777	74.581	2.57166e-06	2.19154e-05	Promoter	13	628189	628785	597	1	YMR184W	YMR184W_mRNA	0
XIII	637007	637112	106	-	1.70203	7.41137	51.6369	1.5283e-05	8.90622e-05	Promoter	13	636291	637004	714	2	YMR188C	YMR188C_mRNA	-108
XIII	637349	637458	110	+	-1.13368	6.68184	13.022	0.00392858	0.00891211	Promoter	13	637500	640604	3105	1	YMR189W	YMR189W_mRNA	-42
XIII	645406	645439	34	-	1.08708	6.86146	14.2331	0.00293809	0.00697402	Promoter	13	640915	645258	4344	2	YMR190C	YMR190C_mRNA	-181
XIII	645611	645656	46	+	1.46974	8.48878	101.627	5.38268e-07	6.59112e-06	Promoter	13	645656	646777	1122	1	YMR191W	YMR191W_mRNA	0
XIII	651082	651167	86	+	-2.02419	9.37663	186.428	2.21822e-08	6.16185e-07	Promoter	13	651145	651910	766	1	YMR194W	YMR194W_mRNA	0
XIII	652275	652309	35	+	-2.79453	5.41777	37.4574	6.65538e-05	0.00028408	Promoter	13	652275	652532	258	1	snR11	snR11_snoRNA	0
XIII	652820	652974	155	-	1.88974	7.73032	65.0989	5.02482e-06	3.75588e-05	Promoter	13	652594	652887	294	2	YMR194C-B	YMR194C-B_mRNA	0
XIII	653914	654029	116	+	-2.70491	9.01529	90.8424	9.54538e-07	1.02989e-05	Promoter	13	654034	654417	384	1	YMR195W	YMR195W_mRNA	-5
XIII	654956	655059	104	+	2.25578	7.03532	71.0844	3.26225e-06	2.69968e-05	Promoter	13	655076	658342	3267	1	YMR196W	YMR196W_mRNA	-17
XIII	664611	664689	79	+	2.04168	6.30987	25.6475	0.000333043	0.0011002	Promoter	13	664752	665522	771	1	YMR200W	YMR200W_mRNA	-63
XIII	667458	667531	74	+	-1.85396	7.64342	30.3444	0.000165948	0.000611283	Promoter	13	667537	668205	669	1	YMR202W	YMR202W_mRNA	-6
XIII	675734	675793	60	+	2.83019	6.66288	64.9256	5.09064e-06	3.77305e-05	Promoter	13	675896	676837	942	1	YMR206W	YMR206W_mRNA	-103
XIII	701664	701774	111	+	-4.46019	8.08506	399.307	3.50372e-10	6.85997e-08	Promoter	13	701790	703367	1578	1	YMR217W	YMR217W_mRNA	-16
XIII	706889	706968	80	-	1.18394	6.61652	16.1036	0.00192939	0.00485959	Promoter	13	703579	706887	3309	2	YMR218C	YMR218C_mRNA	-81
XIII	707058	707235	178	+	1.14241	9.0452	38.3009	6.02731e-05	0.000264137	Promoter	13	707133	712109	4977	1	YMR219W	YMR219W_mRNA	0
XIII	716313	716360	48	-	-1.01149	6.34178	12.6162	0.00434568	0.00972681	Promoter	13	715638	716309	672	2	YMR222C	YMR222C_mRNA	-51
XIII	731171	731243	73	-	-1.89	5.65088	21.4287	0.000676968	0.00200314	Promoter	13	725934	731123	5190	2	YMR229C	YMR229C_mRNA	-120
XIII	732356	732425	70	+	-1.83599	9.2441	141.637	9.56096e-08	1.77571e-06	Promoter	13	732414	733141	728	1	YMR230W	YMR230W_mRNA	0
XIII	742759	742783	25	-	-1.237	5.85649	11.217	0.00624736	0.0132766	Promoter	13	741512	742735	1224	2	YMR235C	YMR235C_mRNA	-48
XIII	746225	746373	149	+	2.8552	6.35635	53.0882	1.34063e-05	8.01413e-05	Promoter	13	746353	747729	1377	1	YMR238W	YMR238W_mRNA	0
XIII	749713	749753	41	-	-4.34853	6.91391	91.124	9.39654e-07	1.01834e-05	Promoter	13	748262	749677	1416	2	YMR239C	YMR239C_mRNA	-76
XIII	754228	754330	103	-	-2.58914	9.1921	301.22	1.64812e-09	1.35376e-07	Promoter	13	754297	754386	90	1	YMR242W-A	YMR242W-A_mRNA	0
XIII	759517	759595	79	+	-3.11581	6.57175	118.433	2.44046e-07	3.55483e-06	Promoter	13	759807	761891	2085	1	YMR246W	YMR246W_mRNA	-212
XIII	762372	763117	746	-	1.45868	9.74517	45.3671	2.79538e-05	0.000142296	Promoter	13	762110	763113	1004	2	snR86	snR86_snoRNA	0
XIII	770734	770810	77	+	1.56568	6.92617	28.151	0.000227295	0.000799036	Promoter	13	770801	772558	1758	1	YMR250W	YMR250W_mRNA	0
XIII	774690	774760	71	+	1.44037	9.97545	63.599	5.62948e-06	4.10509e-05	Promoter	13	774752	774931	180	1	YMR251W-A	YMR251W-A_mRNA	0
XIII	775734	775815	82	-	-4.00961	5.03432	27.6148	0.000246144	0.00085485	Promoter	13	775315	775719	405	2	YMR252C	YMR252C_mRNA	-96
XIII	777916	778034	119	+	1.13834	8.62023	54.1702	1.21824e-05	7.42851e-05	Promoter	13	777615	777923	309	2	YMR254C	YMR254C_mRNA	0
XIII	779135	779184	50	-	1.8153	7.93859	96.2429	7.1131e-07	8.087e-06	Promoter	13	778945	779127	183	2	YMR256C	YMR256C_mRNA	-57
XIII	789839	789888	50	-	-1.18393	8.9554	43.5104	3.38694e-05	0.000166137	Promoter	13	789378	789839	462	2	YMR260C	YMR260C_mRNA	0
XIII	798476	798550	75	+	-1.76921	7.38087	93.3064	8.33084e-07	9.23413e-06	Promoter	13	798518	801379	2862	1	YMR266W	YMR266W_mRNA	0
XIII	79885	79904	20	+	-1.60423	5.23754	9.60306	0.00981169	0.0195912	Promoter	13	79909	81486	1578	1	YML096W	YML096W_mRNA	-5
XIII	804375	804456	82	+	-1.48651	9.30165	77.7818	2.086e-06	1.85566e-05	Promoter	13	804456	805091	636	1	YMR269W	YMR269W_mRNA	0
XIII	807564	807605	42	-	3.60967	6.41415	55.8862	1.05003e-05	6.64993e-05	Promoter	13	806865	807548	684	2	YMR271C	YMR271C_mRNA	-57
XIII	820137	820159	23	+	-1.35168	5.85443	12.8031	0.00414741	0.00933023	Promoter	13	820256	822454	2199	1	YMR277W	YMR277W_mRNA	-97
XIII	82234	82270	37	+	-1.12367	8.17075	55.9283	1.04627e-05	6.63773e-05	Promoter	13	82275	82849	575	1	YML094W	YML094W_mRNA	-5
XIII	83058	83090	33	+	-1.48242	6.86906	18.821	0.00110313	0.00301394	Promoter	13	83090	85789	2700	1	YML093W	YML093W_mRNA	0
XIII	831342	831436	95	-	1.67552	5.9704	15.3477	0.00227802	0.00560691	Promoter	13	827028	831329	4302	2	YMR280C	YMR280C_mRNA	-107
XIII	832268	832290	23	+	-1.62925	5.78272	18.6635	0.00113776	0.00308777	Promoter	13	832339	833253	915	1	YMR281W	YMR281W_mRNA	-49
XIII	836819	836859	41	-	-1.6163	5.41633	6.83807	0.0235517	0.0412091	Promoter	13	835326	836867	1542	2	YMR283C	YMR283C_mRNA	48
XIII	841676	841714	39	-	-1.7342	5.84521	8.76402	0.0126065	0.024189	Promoter	13	840144	841691	1548	2	YMR285C	YMR285C_mRNA	0
XIII	851609	851661	53	-	-3.39898	6.35431	109.618	3.64469e-07	4.87227e-06	Promoter	13	850074	851591	1518	2	YMR290C	YMR290C_mRNA	-70
XIII	860980	861107	128	-	-1.02378	8.67889	27.153	0.000263867	0.000908688	Promoter	13	859215	860891	1677	2	YMR296C	YMR296C_mRNA	-216
XIII	861842	861922	81	+	1.36711	8.49733	75.6736	2.39224e-06	2.07498e-05	Promoter	13	861922	863520	1599	1	YMR297W	YMR297W_mRNA	0
XIII	86709	86778	70	-	1.13004	7.17712	19.169	0.00103092	0.0028422	Promoter	13	85987	86739	753	2	YML092C	YML092C_mRNA	0
XIII	874274	874404	131	-	11.251	8.87022	692.529	4.60897e-10	8.29424e-08	Promoter	13	873291	874337	1047	2	YMR303C	YMR303C_mRNA	0
XIII	874916	875056	141	+	5.79006	6.97966	137.764	1.10641e-07	1.97208e-06	Promoter	13	874987	878679	3693	1	YMR304W	YMR304W_mRNA	0
XIII	880313	880413	101	-	-2.15192	7.507	113.483	3.04622e-07	4.23511e-06	Promoter	13	879063	880232	1170	2	YMR305C	YMR305C_mRNA	-181
XIII	886889	886988	100	+	-2.70508	7.93727	160.736	4.89453e-08	1.05563e-06	Promoter	13	887003	888682	1680	1	YMR307W	YMR307W_mRNA	-15
XIII	892321	892410	90	-	-1.01748	7.47922	18.0591	0.00128312	0.00342495	Promoter	13	888952	892221	3270	2	YMR308C	YMR308C_mRNA	-189
XIII	895445	895507	63	-	-2.51146	6.39528	75.2918	2.4532e-06	2.11654e-05	Promoter	13	892988	895426	2439	2	YMR309C	YMR309C_mRNA	-81
XIII	896639	896759	121	-	-2.19208	7.36754	18.3073	0.00122093	0.00328053	Promoter	13	895716	896669	954	2	YMR310C	YMR310C_mRNA	0
XIII	898341	898397	57	+	-1.14456	6.60644	18.6016	0.00115172	0.00311695	Promoter	13	898405	899226	822	1	YMR312W	YMR312W_mRNA	-8
XIII	902678	902845	168	+	1.08211	8.0147	27.1314	0.000264729	0.000911012	Promoter	13	902800	903849	1050	1	YMR315W	YMR315W_mRNA	0
XIII	914586	914621	36	-	-7.72017	5.28595	93.7038	3.63402e-06	2.90392e-05	Promoter	13	912880	914538	1659	2	YMR319C	YMR319C_mRNA	-83
XIII	914664	914719	56	-	-8.12319	5.65312	122.44	1.145e-06	1.18544e-05	Promoter	13	912880	914538	1659	2	YMR319C	YMR319C_mRNA	-181
XIII	91581	91613	33	-	5.1467	7.45139	99.7309	5.92866e-07	7.12318e-06	Promoter	13	91041	91409	369	2	YML089C	YML089C_mRNA	-204
XIII	92177	92220	44	+	1.17231	6.19965	12.2983	0.0047094	0.0104069	Promoter	13	92235	94241	2007	1	YML088W	YML088W_mRNA	-15
XIV	122189	122270	82	-	3.21337	8.17171	168.507	3.80703e-08	8.86365e-07	Promoter	14	121118	122170	1053	2	YNL274C	YNL274C_mRNA	-100
XIV	13101	13225	125	+	1.74154	6.10014	12.4309	0.00455345	0.0101174	Promoter	14	13267	14163	897	1	YNL333W	YNL333W_mRNA	-42
XIV	137631	137714	84	-	9.39095	7.12724	108.637	1.92435e-06	1.75354e-05	Promoter	14	137699	138094	396	1	YNL269W	YNL269W_mRNA	0
XIV	145289	145332	44	-	1.40454	5.89222	9.18738	0.0110925	0.0216732	Promoter	14	144280	145281	1002	2	YNL265C	YNL265C_mRNA	-51
XIV	157860	157910	51	-	1.66557	6.57512	40.3872	4.75095e-05	0.000218403	Promoter	14	157644	157865	222	2	YNL259C	YNL259C_mRNA	0
XIV	167765	167865	101	-	-1.21686	8.90716	33.0453	0.000115244	0.000446836	Promoter	14	167329	167790	462	2	YNL255C	YNL255C_mRNA	0
XIV	175368	175410	43	+	1.52894	5.91945	18.948	0.00107612	0.00294511	Promoter	14	175410	179348	3939	1	YNL250W	YNL250W_mRNA	0
XIV	182623	182679	57	-	-2.70082	5.73691	31.0187	0.000151171	0.000564542	Promoter	14	181361	182608	1248	2	YNL248C	YNL248C_mRNA	-71
XIV	182839	182906	68	+	-1.66597	7.71745	67.3959	4.24052e-06	3.24951e-05	Promoter	14	182875	185178	2304	1	YNL247W	YNL247W_mRNA	0
XIV	186903	186938	36	-	1.34434	6.53311	16.7661	0.00167468	0.00430026	Promoter	14	186346	186885	540	2	YNL245C	YNL245C_mRNA	-53
XIV	199989	200032	44	-	3.26917	5.82713	35.2114	8.74274e-05	0.000357798	Promoter	14	198502	199977	1476	2	YNL240C	YNL240C_mRNA	-55
XIV	200410	200571	162	+	1.35819	8.85701	50.3248	1.7251e-05	9.71991e-05	Promoter	14	200569	201933	1365	1	YNL239W	YNL239W_mRNA	0
XIV	202146	202183	38	+	-1.36569	6.16304	16.7484	0.00168095	0.00431407	Promoter	14	202428	204872	2445	1	YNL238W	YNL238W_mRNA	-245
XIV	205133	205173	41	+	3.79291	5.2488	27.9187	0.000235245	0.000822933	Promoter	14	205188	206567	1380	1	YNL237W	YNL237W_mRNA	-15
XIV	214825	214904	80	+	-1.00242	8.79187	43.3866	3.43138e-05	0.000167306	Promoter	14	214923	215801	879	1	YNL232W	YNL232W_mRNA	-19
XIV	217148	217233	86	-	-1.3402	6.37014	19.0647	0.00105196	0.00288711	Promoter	14	215987	217042	1056	2	YNL231C	YNL231C_mRNA	-191
XIV	227336	227380	45	+	3.3061	5.68007	31.8988	0.000134148	0.000509575	Promoter	14	227370	228854	1485	1	YNL223W	YNL223W_mRNA	0
XIV	230641	230672	32	-	1.21948	5.75303	7.30711	0.020084	0.0362092	Promoter	14	230105	230672	568	2	snR19	snR19_snRNA	0
XIV	234302	234419	118	+	-1.49238	7.73241	58.4303	8.48315e-06	5.64693e-05	Promoter	14	234413	235714	1302	1	YNL220W	YNL220W_mRNA	0
XIV	240251	240323	73	+	-1.03815	8.06269	44.8653	2.94234e-05	0.000147923	Promoter	14	240331	241311	981	1	YNL217W	YNL217W_mRNA	-8
XIV	247369	247482	114	+	2.21056	7.78384	119.684	2.31063e-07	3.4279e-06	Promoter	14	247461	249809	2349	1	YNL212W	YNL212W_mRNA	0
XIV	251978	252086	109	+	-1.60673	8.61348	90.7781	9.57978e-07	1.03131e-05	Promoter	14	252059	253900	1842	1	YNL209W	YNL209W_mRNA	0
XIV	254368	254452	85	+	1.47888	9.26516	82.4754	1.55535e-06	1.46958e-05	Promoter	14	254418	255017	600	1	YNL208W	YNL208W_mRNA	0
XIV	259533	259584	52	+	8.85202	6.62872	149.936	4.70974e-07	5.99937e-06	Promoter	14	259578	260456	879	1	YNL202W	YNL202W_mRNA	0
XIV	264467	264573	107	-	2.53025	7.47417	148.484	7.45153e-08	1.46463e-06	Promoter	14	263713	264453	741	2	YNL200C	YNL200C_mRNA	-120
XIV	273639	273714	76	-	2.4176	7.69082	81.2559	1.67618e-06	1.55655e-05	Promoter	14	272710	273615	906	2	YNL194C	YNL194C_mRNA	-99
XIV	286188	286273	86	+	-2.40674	7.59572	15.5753	0.00216576	0.00536316	Promoter	14	286308	287609	1302	1	YNL188W	YNL188W_mRNA	-35
XIV	302610	302712	103	+	-2.54684	8.60633	164.47	4.3318e-08	9.80398e-07	Promoter	14	302680	303402	723	1	YNL178W	YNL178W_mRNA	0
XIV	306950	307172	223	-	1.55677	7.27579	34.7093	9.30978e-05	0.000375945	Promoter	14	305070	306980	1911	2	YNL176C	YNL176C_mRNA	0
XIV	308607	308685	79	-	-2.49241	7.97543	167.022	3.99086e-08	9.20357e-07	Promoter	14	307401	308612	1212	2	YNL175C	YNL175C_mRNA	0
XIV	310484	310548	65	+	1.66827	6.73071	47.2193	2.3228e-05	0.000123662	Promoter	14	310636	315882	5247	1	YNL172W	YNL172W_mRNA	-88
XIV	31382	31413	32	-	1.11899	5.9925	12.2803	0.004731	0.0104404	Promoter	14	28739	31378	2640	2	YNL325C	YNL325C_mRNA	-35
XIV	31876	31925	50	+	1.06044	6.16899	7.70438	0.0176152	0.0323331	Promoter	14	31944	33188	1245	1	YNL323W	YNL323W_mRNA	-19
XIV	323572	323604	33	-	-1.45161	7.76488	45.356	2.79854e-05	0.000142296	Promoter	14	322219	323565	1347	2	YNL166C	YNL166C_mRNA	-39
XIV	331285	331364	80	+	-3.38757	7.52299	222.612	8.53711e-09	3.22028e-07	Promoter	14	331322	332154	833	1	YNL162W	YNL162W_mRNA	0
XIV	340279	340385	107	+	1.54767	8.34404	85.9956	1.26003e-06	1.25657e-05	Promoter	14	340352	340858	507	1	YNL157W	YNL157W_mRNA	0
XIV	348529	348598	70	-	-1.29727	8.31371	44.1014	3.18394e-05	0.000157931	Promoter	14	347766	348521	756	2	YNL151C	YNL151C_mRNA	-77
XIV	352337	352390	54	+	-2.35436	7.18745	110.152	3.55424e-07	4.76444e-06	Promoter	14	352414	352530	117	1	YNL145W	YNL145W_mRNA	-24
XIV	359528	359574	47	+	-8.86005	6.35039	198.286	1.36144e-07	2.28441e-06	Promoter	14	359596	360639	1044	1	YNL141W	YNL141W_mRNA	-22
XIV	373590	373652	63	-	4.79719	8.22848	559.497	5.41456e-11	3.38119e-08	Promoter	14	372451	373581	1131	2	YNL134C	YNL134C_mRNA	-71
XIV	374680	374768	89	-	1.45419	7.13627	37.899	6.31738e-05	0.000272039	Promoter	14	374171	374692	522	2	YNL133C	YNL133C_mRNA	0
XIV	375230	375256	27	+	-2.45727	7.02518	115.348	2.79928e-07	3.9482e-06	Promoter	14	375321	378491	3171	1	YNL132W	YNL132W_mRNA	-65
XIV	392069	392379	311	-	1.83545	8.50047	11.4468	0.00587592	0.0125902	Promoter	14	390146	392167	2022	2	YNL125C	YNL125C_mRNA	0
XIV	392857	392877	21	+	-4.76314	5.33256	49.3941	1.88289e-05	0.000104471	Promoter	14	392892	394370	1479	1	YNL124W	YNL124W_mRNA	-15
XIV	406283	406325	43	+	10.561	8.21256	616.887	7.84569e-10	9.11594e-08	Promoter	14	406358	408022	1665	1	YNL117W	YNL117W_mRNA	-33
XIV	412053	412154	102	-	1.67054	7.92113	70.7529	3.33842e-06	2.74869e-05	Promoter	14	410119	412053	1935	2	YNL115C	YNL115C_mRNA	0
XIV	413553	413654	102	+	-3.36933	8.29457	333.43	9.44676e-10	1.03567e-07	Promoter	14	413639	416281	2643	1	YNL112W	YNL112W_mRNA	0
XIV	418491	418587	97	-	-1.63368	8.20966	58.5397	8.40718e-06	5.62614e-05	Promoter	14	417826	418488	663	2	YNL110C	YNL110C_mRNA	-99
XIV	426557	426946	390	-	1.20681	9.17532	43.4851	3.39597e-05	0.000166327	Promoter	14	426719	426808	90	1	YNL103W-A	YNL103W-A_mRNA	0
XIV	427534	427629	96	+	1.0206	6.68622	12.4248	0.00456049	0.0101238	Promoter	14	427735	429753	2019	1	YNL103W	YNL103W_mRNA	-106
XIV	444306	444399	94	-	-2.70589	9.45292	314.008	1.31271e-09	1.1829e-07	Promoter	14	443398	444315	918	2	YNL096C	YNL096C_mRNA	0
XIV	449778	449870	93	+	2.4284	6.99888	110.578	3.48402e-07	4.69356e-06	Promoter	14	449868	450530	663	1	YNL093W	YNL093W_mRNA	0
XIV	452244	452283	40	+	2.42598	6.8623	97.3061	6.72476e-07	7.73586e-06	Promoter	14	452408	456130	3723	1	YNL091W	YNL091W_mRNA	-125
XIV	462266	462344	79	+	-7.88484	5.43565	71.6237	1.13053e-05	7.06182e-05	Promoter	14	462411	465947	3537	1	YNL087W	YNL087W_mRNA	-67
XIV	466850	466895	46	+	-1.43883	6.63192	10.0701	0.0085764	0.0174322	Promoter	14	467131	469623	2493	1	YNL085W	YNL085W_mRNA	-236
XIV	48034	48075	42	-	-1.70243	6.43185	43.1904	3.50323e-05	0.000170297	Promoter	14	45308	48022	2715	2	YNL313C	YNL313C_mRNA	-53
XIV	485516	485575	60	+	-1.79913	7.25503	85.7936	1.27508e-06	1.26623e-05	Promoter	14	485607	486479	873	1	YNL075W	YNL075W_mRNA	-32
XIV	490253	490357	105	+	-1.42073	7.91677	71.8537	3.09323e-06	2.58176e-05	Promoter	14	490317	491240	924	1	YNL072W	YNL072W_mRNA	0
XIV	494986	495054	69	-	-1.99769	7.81156	132.736	1.34512e-07	2.27269e-06	Promoter	14	493956	495001	1046	2	YNL069C	YNL069C_mRNA	0
XIV	498446	498580	135	-	-1.12388	6.94397	25.479	0.000342049	0.00112384	Promoter	14	498538	498684	147	1	YNL067W-A	YNL067W-A_mRNA	0
XIV	510241	510279	39	-	-1.76104	6.38419	19.2233	0.00102018	0.00282378	Promoter	14	508776	510212	1437	2	YNL062C	YNL062C_mRNA	-67
XIV	510438	510542	105	+	-1.68882	9.20287	124.163	1.90778e-07	2.93907e-06	Promoter	14	510540	512396	1857	1	YNL061W	YNL061W_mRNA	0
XIV	517206	517232	27	+	-1.39409	5.19817	10.2288	0.00819925	0.0167707	Promoter	14	517249	517842	594	1	YNL056W	YNL056W_mRNA	-17
XIV	52408	52471	64	-	-1.07593	6.53265	9.9804	0.00879854	0.0178168	Promoter	14	51907	52431	525	2	YNL310C	YNL310C_mRNA	0
XIV	52594	52653	60	+	-1.06427	7.23977	22.3018	0.000580131	0.00176102	Promoter	14	52662	53924	1263	1	YNL309W	YNL309W_mRNA	-9
XIV	526018	526072	55	+	1.52215	6.76195	31.7896	0.000136133	0.000515505	Promoter	14	526086	529583	3498	1	YNL054W	YNL054W_mRNA	-14
XIV	542953	543014	62	+	1.0741	6.14658	7.72767	0.017482	0.0321373	Promoter	14	542963	544978	2016	1	YNL045W	YNL045W_mRNA	0
XIV	553314	553380	67	+	1.11532	6.81913	15.7049	0.00210474	0.005228	Promoter	14	553380	554750	1371	1	YNL040W	YNL040W_mRNA	0
XIV	556989	557061	73	+	-1.29691	7.0508	23.5694	0.000467059	0.00146626	Promoter	14	557020	557783	764	1	YNL038W	YNL038W_mRNA	0
XIV	558996	559204	209	-	1.5815	9.10547	118.302	2.45463e-07	3.55483e-06	Promoter	14	557920	559002	1083	2	YNL037C	YNL037C_mRNA	0
XIV	559638	559666	29	+	-3.65031	4.75756	22.3934	0.000570948	0.0017376	Promoter	14	559814	560479	666	1	YNL036W	YNL036W_mRNA	-148
XIV	585587	585609	23	+	-1.00542	6.64176	18.2893	0.00122532	0.00328978	Promoter	14	585587	585926	340	1	NME1	NME1_snoRNA	0
XIV	592897	592936	40	-	-1.07665	6.76216	20.6938	0.000773525	0.00224046	Promoter	14	591427	592899	1473	2	YNL022C	YNL022C_mRNA	0
XIV	59799	59831	33	-	1.19642	6.98838	20.6321	0.000782339	0.00225659	Promoter	14	58898	59791	894	2	YNL305C	YNL305C_mRNA	-40
XIV	602800	602880	81	+	-1.33125	6.59956	16.4082	0.00180699	0.00458843	Promoter	14	602907	604268	1362	1	YNL016W	YNL016W_mRNA	-27
XIV	605211	605516	306	+	1.73316	10.9418	103.156	4.9851e-07	6.25193e-06	Promoter	14	605384	605611	228	1	YNL015W	YNL015W_mRNA	0
XIV	606237	606267	31	+	7.37321	5.3435	50.6973	4.64144e-05	0.000213876	Promoter	14	606319	609453	3135	1	YNL014W	YNL014W_mRNA	-52
XIV	613190	613195	6	-	-2.37702	5.39716	25.7393	0.000328256	0.00108882	Promoter	14	611836	613170	1335	2	YNL011C	YNL011C_mRNA	-25
XIV	614776	614823	48	+	9.25527	6.9922	287.335	2.56633e-08	6.78682e-07	Promoter	14	614821	616083	1263	1	YNL009W	YNL009W_mRNA	0
XIV	618227	618281	55	-	1.45797	5.94282	9.90215	0.00899803	0.0181501	Promoter	14	616211	618241	2031	2	YNL008C	YNL008C_mRNA	0
XIV	627150	627214	65	-	-1.21694	9.48961	70.0257	3.51296e-06	2.84427e-05	Promoter	14	626174	627142	969	2	YNL002C	YNL002C_mRNA	-72
XIV	62947	62985	39	-	-2.63529	8.42215	145.812	8.20224e-08	1.55907e-06	Promoter	14	61958	62943	986	2	YNL302C	YNL302C_mRNA	-42
XIV	631008	631303	296	-	1.00642	9.46738	58.926	8.14531e-06	5.51253e-05	Promoter	14	629622	631061	1440	2	YNR001C	YNR001C_mRNA	0
XIV	633854	633967	114	-	5.44323	7.53445	141.517	9.60361e-08	1.77685e-06	Promoter	14	633008	633856	849	2	YNR002C	YNR002C_mRNA	0
XIV	635301	635360	60	-	-1.20643	7.32248	15.9773	0.00198301	0.00497644	Promoter	14	634344	635297	954	2	YNR003C	YNR003C_mRNA	-63
XIV	640132	640235	104	-	1.33343	7.00604	32.985	0.000116157	0.000450017	Promoter	14	639182	640114	933	2	YNR007C	YNR007C_mRNA	-121
XIV	64571	64645	75	-	-2.30729	8.1182	162.991	4.54503e-08	9.96221e-07	Promoter	14	63570	64562	993	2	YNL301C	YNL301C_mRNA	-83
XIV	651715	651759	45	-	-1.16768	6.40926	15.4357	0.00223381	0.00551203	Promoter	14	649028	651712	2685	2	YNR013C	YNR013C_mRNA	-47
XIV	652411	652474	64	+	-6.04341	7.15809	129.621	1.52346e-07	2.47105e-06	Promoter	14	652465	653103	639	1	YNR014W	YNR014W_mRNA	0
XIV	653353	653387	35	+	-2.21102	6.32468	24.009	0.000434067	0.0013769	Promoter	14	653387	654541	1155	1	YNR015W	YNR015W_mRNA	0
XIV	65614	65662	49	+	-3.7859	7.95664	187.09	2.17643e-08	6.12169e-07	Promoter	14	65744	66052	309	1	YNL300W	YNL300W_mRNA	-82
XIV	664202	664297	96	+	-1.31849	7.98914	67.8639	4.09894e-06	3.19127e-05	Promoter	14	664270	664944	675	1	YNR018W	YNR018W_mRNA	0
XIV	668315	668353	39	+	-1.04878	6.81692	20.5412	0.000795557	0.00228616	Promoter	14	668377	669591	1215	1	YNR021W	YNR021W_mRNA	-24
XIV	674881	674919	39	+	-2.00614	5.29382	16.9316	0.00161739	0.00417961	Promoter	14	674923	675876	954	1	YNR027W	YNR027W_mRNA	-4
XIV	685866	685939	74	+	1.02678	5.6236	6.4724	0.0267598	0.0461913	Promoter	14	686010	687116	1107	1	YNR032W	YNR032W_mRNA	-71
XIV	692355	692412	58	+	1.99337	6.79665	39.7174	5.12257e-05	0.000232522	Promoter	14	692561	692857	297	1	YNR034W-A	YNR034W-A_mRNA	-149
XIV	692454	692517	64	+	2.33171	8.85548	239.642	5.72759e-09	2.40263e-07	Promoter	14	692561	692857	297	1	YNR034W-A	YNR034W-A_mRNA	-44
XIV	694781	694879	99	-	1.12772	7.20744	27.9792	0.000233144	0.000817349	Promoter	14	694361	694822	462	2	YNR036C	YNR036C_mRNA	0
XIV	701833	701889	57	+	-1.39983	6.88413	30.0122	0.000173851	0.000636536	Promoter	14	701895	703085	1191	1	YNR043W	YNR043W_mRNA	-6
XIV	703658	703658	1	+	-7.96348	5.50613	96.115	3.25969e-06	2.69968e-05	Promoter	14	703699	705876	2178	1	YNR044W	YNR044W_mRNA	-41
XIV	707731	707799	69	+	-1.31523	7.61902	47.3406	2.29527e-05	0.000122599	Promoter	14	707788	708195	408	1	YNR046W	YNR046W_mRNA	0
XIV	715427	715484	58	-	-2.24788	6.07686	32.4391	0.000124818	0.000478995	Promoter	14	714048	715388	1341	2	YNR050C	YNR050C_mRNA	-96
XIV	716115	716117	3	+	-3.49938	5.08323	31.8876	0.000134352	0.00050995	Promoter	14	716120	716284	165	1	snR49	snR49_snoRNA	-3
XIV	720686	720782	97	-	-1.20707	7.67447	31.7466	0.000136924	0.000518095	Promoter	14	719346	720647	1302	2	YNR052C	YNR052C_mRNA	-135
XIV	723136	723166	31	-	-3.55396	6.43354	72.437	2.97194e-06	2.49336e-05	Promoter	14	721120	723112	1993	2	YNR053C	YNR053C_mRNA	-54
XIV	724285	724366	82	-	-2.05376	9.45731	264.12	3.37657e-09	1.76789e-07	Promoter	14	723356	724306	951	2	YNR054C	YNR054C_mRNA	0
XIV	779892	779918	27	+	-2.15874	5.76993	11.8413	0.00529735	0.0115099	Promoter	14	779916	781040	1125	1	YNR075W	YNR075W_mRNA	0
XIV	80560	80684	125	+	1.04261	7.52857	14.0585	0.00306089	0.00720836	Promoter	14	80640	82541	1902	1	YNL293W	YNL293W_mRNA	0
XV	1015043	1015056	14	-	-2.67973	5.95613	49.4655	1.8702e-05	0.000104004	Promoter	15	1013241	1014821	1581	2	YOR360C	YOR360C_mRNA	-235
XV	1023192	1023295	104	-	1.41149	6.6136	20.0438	0.000872713	0.00247761	Promoter	15	1020222	1023212	2991	2	YOR363C	YOR363C_mRNA	0
XV	1028635	1028744	110	-	-2.88945	7.92883	145.394	8.32748e-08	1.57671e-06	Promoter	15	1028194	1028625	432	2	YOR369C	YOR369C_mRNA	-119
XV	1034237	1034318	82	-	1.30422	6.95711	23.6545	0.000460444	0.00144736	Promoter	15	1031489	1034182	2694	2	YOR371C	YOR371C_mRNA	-136
XV	1039765	1039898	134	+	2.55284	9.87784	322.539	1.1334e-09	1.07712e-07	Promoter	15	1039840	1041399	1560	1	YOR374W	YOR374W_mRNA	0
XV	1043089	1043118	30	-	-2.45925	6.63081	73.0394	2.85248e-06	2.40558e-05	Promoter	15	1041678	1043042	1365	2	YOR375C	YOR375C_mRNA	-76
XV	1046151	1046299	149	+	-10.1518	7.64616	259.945	4.03564e-08	9.26294e-07	Promoter	15	1046226	1047803	1578	1	YOR377W	YOR377W_mRNA	0
XV	1060827	1061160	334	-	1.74328	10.4173	86.9371	1.19258e-06	1.22171e-05	Promoter	15	1060441	1061055	615	2	YOR383C	YOR383C_mRNA	0
XV	1061449	1061555	107	+	2.40969	5.71189	29.9745	0.000174776	0.000639443	Promoter	15	1061564	1063648	2085	1	YOR384W	YOR384W_mRNA	-9
XV	1064991	1065073	83	+	-1.48269	7.03087	48.6424	2.02284e-05	0.000111096	Promoter	15	1065043	1065915	873	1	YOR385W	YOR385W_mRNA	0
XV	117941	117999	59	+	1.93885	7.16138	84.0908	1.41072e-06	1.35395e-05	Promoter	15	118000	119322	1323	1	YOL103W-A	YOL103W-A	-1
XV	127900	127983	84	-	-2.13019	6.82278	50.2036	1.74474e-05	9.81491e-05	Promoter	15	126982	127920	939	2	YOL101C	YOL101C_mRNA	0
XV	137826	137853	28	-	-1.86166	7.32139	77.9197	2.06763e-06	1.84607e-05	Promoter	15	136527	137825	1299	2	YOL097C	YOL097C_mRNA	-28
XV	144160	144184	25	+	-1.26041	6.01733	19.1053	0.00104372	0.00287421	Promoter	15	144204	145130	927	1	YOL092W	YOL092W_mRNA	-20
XV	153524	153564	41	-	1.11032	6.08493	6.85861	0.0233855	0.0409773	Promoter	15	150398	153490	3093	2	YOL089C	YOL089C_mRNA	-74
XV	159105	159163	59	+	4.15793	5.895	38.5975	5.82317e-05	0.000256663	Promoter	15	159173	159445	273	1	YOL086W-A	YOL086W-A_mRNA	-10
XV	160588	160644	57	-	-2.483	8.96775	289.055	2.06463e-09	1.4133e-07	Promoter	15	159548	160594	1047	2	YOL086C	YOL086C_mRNA	0
XV	161457	161494	38	+	-7.50684	5.09734	77.0058	8.34848e-06	5.61364e-05	Promoter	15	161579	161791	213	1	YOL085W-A	YOL085W-A_mRNA	-85
XV	162230	162321	92	+	4.30329	6.87354	99.5402	5.98709e-07	7.15216e-06	Promoter	15	162356	165331	2976	1	YOL084W	YOL084W_mRNA	-35
XV	165585	165648	64	+	2.58656	5.93814	19.5754	0.000953549	0.00267742	Promoter	15	165714	166952	1239	1	YOL083W	YOL083W_mRNA	-66
XV	168634	168760	127	+	1.25672	9.24864	55.4796	1.08728e-05	6.82672e-05	Promoter	15	168727	169974	1248	1	YOL082W	YOL082W_mRNA	0
XV	185388	185444	57	+	1.58176	8.31056	105.589	4.42167e-07	5.7529e-06	Promoter	15	185438	185644	207	1	YOL077W-A	YOL077W-A_mRNA	0
XV	186731	186804	74	-	-2.44569	6.91281	99.1812	6.09896e-07	7.22081e-06	Promoter	15	185848	186723	876	2	YOL077C	YOL077C_mRNA	-81
XV	186999	187002	4	+	-1.26259	5.03834	6.48133	0.0266755	0.0460621	Promoter	15	187024	189414	2391	1	YOL076W	YOL076W_mRNA	-22
XV	212181	212252	72	+	-1.06959	6.14632	11.9246	0.00518397	0.0113016	Promoter	15	212244	213734	1491	1	YOL061W	YOL061W_mRNA	0
XV	219131	219152	22	+	-2.66728	6.66119	55.4968	1.08568e-05	6.82545e-05	Promoter	15	219211	220473	1263	1	YOL058W	YOL058W_mRNA	-59
XV	223174	223239	66	+	-3.52436	6.23869	35.3595	8.5833e-05	0.000352068	Promoter	15	223268	224179	912	1	YOL056W	YOL056W_mRNA	-29
XV	226110	226157	48	-	6.95006	4.97467	45.9032	6.88501e-05	0.000291579	Promoter	15	224420	226075	1656	2	YOL055C	YOL055C_mRNA	-82
XV	231662	231843	182	-	2.22678	9.6679	270.62	2.95784e-09	1.72211e-07	Promoter	15	231570	231755	186	2	YOL052C-A	YOL052C-A_mRNA	0
XV	233646	233658	13	-	-7.03245	4.71228	52.551	4.01925e-05	0.00019025	Promoter	15	232446	233636	1191	2	YOL052C	YOL052C_mRNA	-22
XV	243375	243415	41	+	7.62005	5.54378	73.1514	1.03521e-05	6.58472e-05	Promoter	15	243497	246802	3306	1	YOL045W	YOL045W_mRNA	-82
XV	247082	247111	30	+	2.19127	5.83346	13.9019	0.00317623	0.00742341	Promoter	15	247150	248301	1152	1	YOL044W	YOL044W_mRNA	-39
XV	252670	252723	54	-	-1.52891	7.34141	49.5332	1.85826e-05	0.000103577	Promoter	15	251267	252646	1380	2	YOL041C	YOL041C_mRNA	-77
XV	253415	253694	280	-	-2.3156	10.588	266.908	3.18898e-09	1.76336e-07	Promoter	15	253149	253577	429	2	YOL040C	YOL040C_mRNA	0
XV	254129	254323	195	+	-1.55441	10.2605	77.6704	2.10098e-06	1.86388e-05	Promoter	15	254297	254617	321	1	YOL039W	YOL039W_mRNA	0
XV	255080	255199	120	-	1.28878	7.58017	32.8025	0.000118972	0.000459786	Promoter	15	254926	255021	96	2	YOL038C-A	YOL038C-A_mRNA	-178
XV	255283	255334	52	+	1.46693	7.1646	21.4406	0.00067553	0.0020019	Promoter	15	255337	256101	765	1	YOL038W	YOL038W_mRNA	-3
XV	267503	267604	102	-	2.16467	6.49583	52.045	1.47257e-05	8.63833e-05	Promoter	15	266264	267529	1266	2	YOL031C	YOL031C_mRNA	0
XV	299491	299554	64	+	-9.31071	6.80148	299.151	2.13828e-08	6.04933e-07	Promoter	15	299693	300067	375	1	YOL014W	YOL014W_mRNA	-139
XV	303168	303196	29	-	1.19319	5.75333	9.51052	0.0100809	0.0200383	Promoter	15	301380	303035	1656	2	YOL013C	YOL013C_mRNA	-161
XV	305299	305328	30	+	-2.78862	4.78512	15.8594	0.00203464	0.00507982	Promoter	15	305349	307409	2061	1	YOL011W	YOL011W_mRNA	-21
XV	310115	310194	80	-	1.40317	6.97154	22.1974	0.000590806	0.00179065	Promoter	15	309324	310139	816	2	YOL009C	YOL009C_mRNA	0
XV	312436	312452	17	-	-3.91471	4.96217	25.0196	0.000368087	0.00119567	Promoter	15	311342	312367	1026	2	YOL007C	YOL007C_mRNA	-85
XV	31646	31692	47	-	1.49231	7.78852	21.049	0.000724954	0.0021238	Promoter	15	28703	31606	2904	2	YOL155C	YOL155C_mRNA	-86
XV	333527	333561	35	+	-3.59378	5.19542	34.0151	0.000101667	0.000403516	Promoter	15	333592	334356	765	1	YOR004W	YOR004W_mRNA	-31
XV	338636	338688	53	-	-1.16696	5.85031	11.4314	0.00589994	0.0126305	Promoter	15	337680	338621	942	2	YOR006C	YOR006C_mRNA	-67
XV	371598	371696	99	+	3.03404	7.75051	210.882	1.14348e-08	3.97443e-07	Promoter	15	371685	371957	273	1	YOR020W-A	YOR020W-A_mRNA	0
XV	400080	400161	82	-	1.16469	7.60466	28.6722	0.000210586	0.000752356	Promoter	15	397735	400104	2370	2	YOR035C	YOR035C_mRNA	0
XV	406995	407096	102	+	2.80882	6.85317	55.8061	1.05726e-05	6.664e-05	Promoter	15	407064	407921	858	1	YOR040W	YOR040W_mRNA	0
XV	412761	412767	7	+	-1.3923	5.83083	13.5193	0.00348031	0.00803378	Promoter	15	413007	413480	474	1	YOR044W	YOR044W_mRNA	-240
XV	415920	415956	37	-	-1.33204	7.53176	20.8871	0.000746638	0.00217423	Promoter	15	414459	415907	1449	2	YOR046C	YOR046C_mRNA	-49
XV	417776	417842	67	-	-3.10565	7.74571	295.838	1.81889e-09	1.38292e-07	Promoter	15	416347	417681	1335	2	YOR047C	YOR047C_mRNA	-161
XV	423917	423933	17	-	-6.75783	4.49671	47.4687	6.03075e-05	0.000264137	Promoter	15	422668	423732	1065	2	YOR049C	YOR049C_mRNA	-201
XV	426092	426174	83	-	-2.61877	7.08271	94.4999	7.80842e-07	8.775e-06	Promoter	15	424846	426084	1239	2	YOR051C	YOR051C_mRNA	-90
XV	429855	430018	164	-	2.09145	8.08308	31.4396	0.00014273	0.000537367	Promoter	15	427833	429857	2025	2	YOR054C	YOR054C_mRNA	0
XV	431675	431751	77	-	-1.73266	6.87376	48.7399	2.00401e-05	0.000110311	Promoter	15	430247	431626	1380	2	YOR056C	YOR056C_mRNA	-125
XV	43646	43690	45	+	3.74661	7.20247	69.8114	3.56642e-06	2.87238e-05	Promoter	15	43694	44722	1029	1	YOL151W	YOL151W_mRNA	-4
XV	444598	444717	120	+	-2.46773	9.33442	200.213	1.51238e-08	4.77486e-07	Promoter	15	444686	445849	1164	1	YOR063W	YOR063W_mRNA	0
XV	446712	446820	109	-	1.06446	7.76873	22.7142	0.000540119	0.00165818	Promoter	15	446079	446738	660	2	YOR064C	YOR064C_mRNA	0
XV	449317	449339	23	+	-1.63878	5.5063	17.2304	0.00151969	0.00395733	Promoter	15	449436	451325	1890	1	YOR066W	YOR066W_mRNA	-97
XV	468180	468207	28	+	1.23214	6.24791	8.99329	0.0117581	0.0227476	Promoter	15	468212	469252	1041	1	YOR075W	YOR075W_mRNA	-5
XV	471627	471661	35	-	1.32085	6.51794	20.2196	0.000844475	0.00240868	Promoter	15	469377	471620	2244	2	YOR076C	YOR076C_mRNA	-41
XV	472642	472752	111	+	-2.04727	8.74192	78.6934	1.96803e-06	1.77671e-05	Promoter	15	472725	473369	645	1	YOR078W	YOR078W_mRNA	0
XV	474588	474770	183	+	1.10051	6.49351	11.5039	0.00578771	0.0124121	Promoter	15	474594	476792	2199	1	YOR080W	YOR080W_mRNA	0
XV	48636	48695	60	-	2.76729	6.09185	56.1162	1.02964e-05	6.56648e-05	Promoter	15	47933	48643	711	2	YOL147C	YOL147C_mRNA	0
XV	502471	502499	29	-	-1.15894	6.63953	14.4112	0.00281877	0.0067269	Promoter	15	497506	502452	4947	2	YOR093C	YOR093C_mRNA	-47
XV	505695	505787	93	+	-3.41376	8.30067	299.043	1.71482e-09	1.35376e-07	Promoter	15	505794	506767	974	1	YOR096W	YOR096W_mRNA	-7
XV	507509	507639	131	-	1.07019	7.14638	18.77	0.0011142	0.00303885	Promoter	15	506978	507505	528	2	YOR097C	YOR097C_mRNA	-134
XV	514287	514349	63	-	8.62625	6.42263	168.333	2.82273e-07	3.96977e-06	Promoter	15	513295	514278	984	2	YOR100C	YOR100C_mRNA	-71
XV	515143	515182	40	+	-1.55324	5.8339	20.1848	0.00084997	0.00242152	Promoter	15	515244	516173	930	1	YOR101W	YOR101W_mRNA	-62
XV	522986	523019	34	+	-7.04877	4.71646	53.0779	3.86123e-05	0.000184203	Promoter	15	523027	524841	1815	1	YOR108W	YOR108W_mRNA	-8
XV	53037	53097	61	+	-1.48859	7.74938	61.9221	6.40979e-06	4.56662e-05	Promoter	15	53098	54552	1455	1	YOL144W	YOL144W_mRNA	-1
XV	544341	544359	19	-	-1.25395	6.1322	14.5459	0.00273234	0.00653988	Promoter	15	539763	544145	4383	2	YOR116C	YOR116C_mRNA	-214
XV	551007	551108	102	+	3.46169	7.62305	184.282	2.36018e-08	6.3451e-07	Promoter	15	551114	552052	939	1	YOR120W	YOR120W_mRNA	-6
XV	55129	55194	66	-	-1.01694	8.34213	47.5154	2.2563e-05	0.000120783	Promoter	15	54595	55104	510	2	YOL143C	YOL143C_mRNA	-90
XV	566204	566275	72	-	-1.11331	7.94043	49.7388	1.82255e-05	0.00010182	Promoter	15	564476	566191	1716	2	YOR128C	YOR128C_mRNA	-84
XV	570812	570905	94	-	-2.71328	5.58926	23.8146	0.000448302	0.00141376	Promoter	15	569929	570807	879	2	YOR130C	YOR130C_mRNA	-98
XV	574996	575068	73	+	-1.49022	7.22611	37.1283	6.92115e-05	0.000292855	Promoter	15	575098	577626	2529	1	YOR133W	YOR133W_mRNA	-30
XV	578433	578474	42	+	2.66075	7.00458	67.4262	4.23119e-06	3.24747e-05	Promoter	15	578564	579793	1230	1	YOR134W	YOR134W_mRNA	-90
XV	580120	580223	104	+	1.22017	8.43799	39.4537	5.27818e-05	0.000237592	Promoter	15	580250	581359	1110	1	YOR136W	YOR136W_mRNA	-27
XV	592829	592895	67	+	1.48047	7.99465	69.1424	3.73962e-06	2.96368e-05	Promoter	15	593057	594046	990	1	YOR142W	YOR142W_mRNA	-162
XV	606187	606249	63	-	-1.05717	8.13563	56.2375	1.01906e-05	6.50757e-05	Promoter	15	605347	606171	825	2	YOR145C	YOR145C_mRNA	-78
XV	606568	606582	15	+	2.87584	5.66585	26.1574	0.000307456	0.00103249	Promoter	15	606607	608475	1869	1	YOR147W	YOR147W_mRNA	-25
XV	61051	61118	68	-	-1.07034	7.68402	32.2731	0.000127601	0.000487749	Promoter	15	60383	61024	642	2	YOL139C	YOL139C_mRNA	-94
XV	619632	619691	60	+	-2.16648	8.42028	193.391	1.8221e-08	5.40629e-07	Promoter	15	619840	624375	4536	1	YOR153W	YOR153W_mRNA	-149
XV	624653	624719	67	+	-1.1359	7.48671	29.1791	0.000195706	0.000705745	Promoter	15	624729	626492	1764	1	YOR154W	YOR154W_mRNA	-10
XV	627964	628012	49	-	1.24262	6.16633	13.7145	0.00332108	0.00771746	Promoter	15	626628	627980	1353	2	YOR155C	YOR155C_mRNA	0
XV	631755	631850	96	-	1.09857	8.52076	55.6098	1.07518e-05	6.76824e-05	Promoter	15	630966	631751	786	2	YOR157C	YOR157C_mRNA	-99
XV	649011	649076	66	-	-1.39351	7.45039	52.7681	1.37958e-05	8.16668e-05	Promoter	15	648804	649007	204	2	YOR167C	YOR167C_mRNA	-69
XV	657167	657261	95	+	1.85045	7.79165	82.7111	1.5332e-06	1.45147e-05	Promoter	15	657264	658325	1062	1	YOR173W	YOR173W_mRNA	-3
XV	661719	661769	51	-	-1.84449	5.77809	24.2548	0.000416813	0.0013291	Promoter	15	659815	661674	1860	2	YOR175C	YOR175C_mRNA	-95
XV	662218	662239	22	+	-3.96882	4.70511	26.3309	0.000299283	0.00101063	Promoter	15	662401	663582	1182	1	YOR176W	YOR176W_mRNA	-162
XV	672399	672450	52	-	-1.66511	6.58064	42.9056	3.61068e-05	0.000173911	Promoter	15	671845	672411	567	2	YOR179C	YOR179C_mRNA	0
XV	678788	678840	53	-	-1.11665	7.80082	41.6251	4.14446e-05	0.000194388	Promoter	15	678191	678793	603	2	YOR182C	YOR182C_mRNA	0
XV	679243	679273	31	+	1.14945	5.54178	9.22683	0.0109627	0.0215122	Promoter	15	679357	680544	1188	1	YOR184W	YOR184W_mRNA	-84
XV	679298	679321	24	+	-7.73421	5.30299	95.2491	3.38847e-06	2.77581e-05	Promoter	15	679357	680544	1188	1	YOR184W	YOR184W_mRNA	-36
XV	682127	682184	58	-	2.89616	7.30128	120.339	2.2459e-07	3.35232e-06	Promoter	15	681444	682106	663	2	YOR185C	YOR185C_mRNA	-78
XV	721919	721951	33	+	-2.99722	7.06881	163.076	4.53247e-08	9.96221e-07	Promoter	15	721946	722608	663	1	YOR202W	YOR202W_mRNA	0
XV	722876	722901	26	+	-1.52876	6.62559	35.3551	8.58803e-05	0.000352068	Promoter	15	722911	724725	1815	1	YOR204W	YOR204W_mRNA	-10
XV	727439	727489	51	+	-1.38432	8.07838	43.5737	3.3645e-05	0.00016537	Promoter	15	727512	729644	2133	1	YOR206W	YOR206W_mRNA	-23
XV	733451	733518	68	-	-1.45873	6.2496	19.7257	0.000926681	0.002608	Promoter	15	730008	733457	3450	2	YOR207C	YOR207C_mRNA	0
XV	733695	733783	89	+	1.17666	6.37508	15.7259	0.00209507	0.00520665	Promoter	15	733925	736177	2253	1	YOR208W	YOR208W_mRNA	-142
XV	733939	734028	90	+	1.96348	5.67921	17.8617	0.00133527	0.00354084	Promoter	15	733925	736177	2253	1	YOR208W	YOR208W_mRNA	14
XV	738251	738326	76	+	-1.32341	7.60378	54.5997	1.17333e-05	7.22715e-05	Promoter	15	738320	738532	213	1	YOR210W	YOR210W_mRNA	0
XV	742622	742703	82	+	2.22188	7.08077	93.1212	8.41554e-07	9.28572e-06	Promoter	15	742910	744181	1272	1	YOR212W	YOR212W_mRNA	-207
XV	742735	742840	106	+	-2.40546	7.73223	134.281	1.26584e-07	2.17653e-06	Promoter	15	742910	744181	1272	1	YOR212W	YOR212W_mRNA	-70
XV	747194	747347	154	-	1.64291	10.2679	141.223	9.70946e-08	1.78963e-06	Promoter	15	746725	747282	558	2	YOR215C	YOR215C_mRNA	0
XV	758271	758311	41	+	-3.48951	6.83047	148.435	7.46459e-08	1.46463e-06	Promoter	15	758330	759253	924	1	YOR222W	YOR222W_mRNA	-19
XV	759498	759529	32	-	-1.72143	5.6561	11.9511	0.00514857	0.0112395	Promoter	15	759326	759529	204	2	snR35	snR35_snoRNA	0
XV	761266	761301	36	-	-1.03407	6.75456	18.7598	0.00111643	0.00304004	Promoter	15	760825	761265	441	2	YOR224C	YOR224C_mRNA	-36
XV	772413	772558	146	+	-1.23535	7.93753	22.6373	0.000547324	0.00167397	Promoter	15	772601	774127	1527	1	YOR231W	YOR231W_mRNA	-43
XV	779414	779437	24	-	-3.9098	6.71058	198.532	1.58252e-08	4.9048e-07	Promoter	15	778555	779405	851	2	YOR234C	YOR234C_mRNA	-32
XV	783659	783679	21	+	-1.34148	5.42188	11.588	0.00566063	0.0121933	Promoter	15	783677	784588	912	1	YOR238W	YOR238W_mRNA	0
XV	792255	792299	45	-	-1.12795	6.61407	14.6593	0.00266201	0.00639672	Promoter	15	790211	792241	2031	2	YOR243C	YOR243C_mRNA	-58
XV	797414	797476	63	+	-2.38117	9.15562	171.446	3.47171e-08	8.24065e-07	Promoter	15	797676	798308	633	1	YOR247W	YOR247W_mRNA	-200
XV	80308	80340	33	+	-2.13108	8.91521	173.449	3.26306e-08	7.89952e-07	Promoter	15	80348	81190	843	1	YOL127W	YOL127W_mRNA	-8
XV	804336	804370	35	+	-1.70047	6.15374	34.3104	9.79127e-05	0.000392102	Promoter	15	804377	804907	531	1	YOR253W	YOR253W_mRNA	-7
XV	813924	813972	49	+	-1.25564	6.26464	17.9581	0.00130951	0.00348202	Promoter	15	813984	815720	1737	1	YOR260W	YOR260W_mRNA	-12
XV	816985	817062	78	-	1.05761	8.43604	52.8782	1.36603e-05	8.11612e-05	Promoter	15	815915	816931	1017	2	YOR261C	YOR261C_mRNA	-131
XV	817219	817291	73	+	1.60158	6.2303	24.7869	0.000382166	0.00123481	Promoter	15	817292	818335	1044	1	YOR262W	YOR262W_mRNA	-1
XV	82968	83007	40	-	1.00793	8.20175	25.5244	0.000339594	0.00111729	Promoter	15	81787	82920	1134	2	YOL126C	YOL126C_mRNA	-87
XV	832323	832348	26	+	-1.04832	6.19738	8.9893	0.0117723	0.0227588	Promoter	15	832332	832521	190	1	snR8	snR8_snoRNA	0
XV	832723	832800	78	+	-4.37124	6.7257	103.943	4.79401e-07	6.09029e-06	Promoter	15	832813	834195	1383	1	YOR272W	YOR272W_mRNA	-13
XV	836502	836548	47	-	-2.46438	6.25081	68.2996	3.9721e-06	3.11746e-05	Promoter	15	834452	836431	1980	2	YOR273C	YOR273C_mRNA	-117
XV	83773	83806	34	+	-2.28658	5.80418	24.9821	0.000370316	0.00120131	Promoter	15	83834	85264	1431	1	YOL125W	YOL125W_mRNA	-28
XV	849606	849734	129	+	1.279	8.94671	66.504	4.52662e-06	3.42027e-05	Promoter	15	849635	850054	420	1	YOR285W	YOR285W_mRNA	0
XV	851858	851887	30	-	-2.31509	5.90526	28.947	0.00020236	0.000725631	Promoter	15	850937	851839	903	2	YOR287C	YOR287C_mRNA	-48
XV	853097	853158	62	-	1.24607	5.82705	11.7217	0.00546533	0.0118249	Promoter	15	852121	853077	957	2	YOR288C	YOR288C_mRNA	-81
XV	853348	853411	64	+	1.97833	7.66182	88.0987	1.11514e-06	1.16194e-05	Promoter	15	853357	854112	756	1	YOR289W	YOR289W_mRNA	0
XV	867027	867103	77	+	-1.99224	9.66101	201.949	1.44374e-08	4.59166e-07	Promoter	15	867098	867852	755	1	YOR293W	YOR293W_mRNA	0
XV	86774	86803	30	-	-3.27495	6.25126	36.8587	7.1482e-05	0.000300632	Promoter	15	85456	86757	1302	2	YOL124C	YOL124C_mRNA	-46
XV	868291	868311	21	+	-1.18572	6.27958	15.842	0.0020424	0.00509658	Promoter	15	868340	868951	612	1	YOR294W	YOR294W_mRNA	-29
XV	878354	878422	69	+	-1.33174	6.07273	10.2963	0.00804482	0.0164965	Promoter	15	878435	880675	2241	1	YOR299W	YOR299W_mRNA	-13
XV	880931	881017	87	+	-2.7652	7.80778	118.335	2.45107e-07	3.55483e-06	Promoter	15	880965	882272	1308	1	YOR301W	YOR301W_mRNA	0
XV	898384	898399	16	-	-4.0772	4.78821	27.1947	0.000262203	0.00090424	Promoter	15	896825	898360	1536	2	YOR310C	YOR310C_mRNA	-39
XV	904673	904716	44	+	-7.01015	4.68685	57.0407	2.88611e-05	0.000145687	Promoter	15	904760	905800	1041	1	YOR315W	YOR315W_mRNA	-44
XV	907674	907717	44	-	1.76939	6.14417	26.2136	0.000304777	0.00102633	Promoter	15	906236	907555	1320	2	YOR316C	YOR316C_mRNA	-162
XV	91455	91459	5	-	1.74008	4.97114	7.00129	0.0222693	0.0393187	Promoter	15	89692	91419	1728	2	YOL122C	YOL122C_mRNA	-40
XV	922914	922940	27	-	-1.06214	7.44344	38.6855	5.76423e-05	0.000254574	Promoter	15	921535	922905	1371	2	YOR323C	YOR323C_mRNA	-35
XV	925017	925056	40	-	7.06574	5.07295	49.3443	5.17047e-05	0.000233425	Promoter	15	923232	925040	1809	2	YOR324C	YOR324C_mRNA	0
XV	925114	925219	106	-	1.10697	7.91427	42.7177	3.68373e-05	0.000176601	Promoter	15	923232	925040	1809	2	YOR324C	YOR324C_mRNA	-179
XV	92859	92944	86	-	-2.82738	8.77829	350.31	7.20294e-10	8.76238e-08	Promoter	15	92026	92850	825	2	YOL121C	YOL121C_mRNA	-94
XV	931085	931173	89	-	1.48856	8.12086	61.616	6.56559e-06	4.65717e-05	Promoter	15	930734	931081	348	2	YOR327C	YOR327C_mRNA	-92
XV	94396	94444	49	-	-2.93687	8.38561	292.025	1.95251e-09	1.39431e-07	Promoter	15	93395	94402	1008	2	YOL120C	YOL120C_mRNA	0
XV	949182	949256	75	-	-1.33601	6.39127	20.0076	0.000878659	0.00249304	Promoter	15	946233	949109	2877	2	YOR335C	YOR335C_mRNA	-147
XV	960862	960880	19	+	-2.50435	6.59929	69.9462	3.53269e-06	2.85549e-05	Promoter	15	960987	965981	4995	1	YOR341W	YOR341W_mRNA	-107
XV	96366	96466	101	-	2.08082	6.77695	59.0263	8.07885e-06	5.49584e-05	Promoter	15	94856	96361	1506	2	YOL119C	YOL119C_mRNA	-105
XV	967708	967757	50	-	-2.43994	6.30857	37.8666	6.34149e-05	0.000272356	Promoter	15	966666	967625	960	2	YOR342C	YOR342C_mRNA	-132
XVI	121283	121339	57	-	-1.44344	7.27237	48.3815	2.07424e-05	0.000112774	Promoter	16	120163	121167	1005	2	YPL227C	YPL227C_mRNA	-172
XVI	121694	121759	66	+	-1.60283	7.24721	45.4021	2.78546e-05	0.000142076	Promoter	16	121767	125357	3591	1	YPL226W	YPL226W_mRNA	-8
XVI	128052	128209	158	-	1.9865	7.09244	58.9972	8.09806e-06	5.49584e-05	Promoter	16	126634	128088	1455	2	YPL224C	YPL224C_mRNA	0
XVI	129156	129210	55	-	7.47547	8.55106	321.631	1.15105e-09	1.07712e-07	Promoter	16	128632	129138	507	2	YPL223C	YPL223C_mRNA	-72
XVI	130010	130130	121	+	5.1651	7.27796	147.442	7.73439e-08	1.49942e-06	Promoter	16	130162	132228	2067	1	YPL222W	YPL222W_mRNA	-32
XVI	135747	135782	36	+	-1.72581	6.19452	36.1971	7.7436e-05	0.000322055	Promoter	16	135790	136443	654	1	YPL220W	YPL220W_mRNA	-8
XVI	147378	147408	31	+	1.13438	5.40298	7.93028	0.0163729	0.0303506	Promoter	16	147416	148423	1008	1	YPL215W	YPL215W_mRNA	-8
XVI	153453	153469	17	+	-2.603	5.7751	41.1673	4.35748e-05	0.000202324	Promoter	16	153495	154040	546	1	YPL211W	YPL211W_mRNA	-26
XVI	171164	171206	43	-	10.1998	7.87313	388.993	6.48082e-09	2.65005e-07	Promoter	16	169770	171155	1386	2	YPL201C	YPL201C_mRNA	-51
XVI	171417	171489	73	+	7.42889	5.39076	55.5353	3.21667e-05	0.00015923	Promoter	16	171484	171954	471	1	YPL200W	YPL200W_mRNA	0
XVI	172753	172813	61	-	-1.68139	7.63273	93.7869	8.11572e-07	9.05759e-06	Promoter	16	172033	172755	723	2	YPL199C	YPL199C_mRNA	0
XVI	174966	175039	74	+	2.40298	5.69502	35.9824	7.94925e-05	0.0003292	Promoter	16	175043	175864	822	1	YPL196W	YPL196W_mRNA	-4
XVI	184708	184756	49	-	1.31173	5.64022	11.1586	0.00634626	0.0134561	Promoter	16	183597	184679	1083	2	YPL191C	YPL191C_mRNA	-77
XVI	195339	195590	252	-	2.33389	10.4702	216.743	9.86266e-09	3.56708e-07	Promoter	16	194512	195426	915	2	YPL186C	YPL186C_mRNA	0
XVI	198989	199048	60	+	1.05529	7.15902	15.2691	0.00231841	0.00568618	Promoter	16	199095	199376	282	1	YPL183W-A	YPL183W-A_mRNA	-47
XVI	202525	202583	59	-	-1.60429	5.86491	13.1219	0.00383336	0.00872865	Promoter	16	199495	202536	3042	2	YPL183C	YPL183C_mRNA	0
XVI	227350	227428	79	-	10.5777	8.22748	584.375	1.00613e-09	1.04167e-07	Promoter	16	226169	227371	1203	2	YPL171C	YPL171C_mRNA	0
XVI	242706	242769	64	-	-2.71063	8.87606	130.468	1.47236e-07	2.40419e-06	Promoter	16	241918	242700	783	2	YPL163C	YPL163C_mRNA	-69
XVI	246871	246978	108	+	-1.92848	8.57541	105.31	4.48228e-07	5.79216e-06	Promoter	16	246990	250262	3273	1	YPL160W	YPL160W_mRNA	-12
XVI	24950	25079	130	+	-1.90047	7.03316	65.0109	5.05811e-06	3.76918e-05	Promoter	16	25087	26064	978	1	YPL273W	YPL273W_mRNA	-8
XVI	256738	256852	115	-	1.9699	8.70072	118.17	2.46885e-07	3.56481e-06	Promoter	16	255913	256767	855	2	YPL156C	YPL156C_mRNA	0
XVI	273195	273263	69	+	3.85394	8.70917	324.764	1.09148e-09	1.07712e-07	Promoter	16	273255	275867	2613	1	YPL147W	YPL147W_mRNA	0
XVI	277546	277615	70	-	-1.6123	6.93778	47.9932	2.15363e-05	0.000116053	Promoter	16	276162	277529	1368	2	YPL146C	YPL146C_mRNA	-86
XVI	281514	281517	4	-	-3.98579	4.74149	24.6869	0.000388414	0.00125084	Promoter	16	281056	281517	462	2	snR17b	snR17b_snoRNA	0
XVI	282058	282112	55	+	-2.44275	7.71527	126.503	1.73046e-07	2.75725e-06	Promoter	16	282122	282970	849	1	YPL143W	YPL143W_mRNA	-10
XVI	292404	292506	103	-	1.08239	7.04444	9.90181	0.00899891	0.0181501	Promoter	16	291366	292427	1062	2	YPL138C	YPL138C_mRNA	0
XVI	299506	299534	29	-	2.08367	6.43783	54.6523	1.16797e-05	7.22017e-05	Promoter	16	298571	299503	933	2	YPL134C	YPL134C_mRNA	-31
XVI	30033	30103	71	+	1.04313	7.73084	22.129	0.000597929	0.00180078	Promoter	16	30079	30267	189	1	YPL271W	YPL271W_mRNA	0
XVI	301492	301648	157	+	1.69045	7.23231	36.9226	7.09357e-05	0.000298859	Promoter	16	301716	302618	903	1	YPL132W	YPL132W_mRNA	-68
XVI	303051	303117	67	+	-2.80979	9.12915	353.732	6.82821e-10	8.70865e-08	Promoter	16	303121	304014	894	1	YPL131W	YPL131W_mRNA	-4
XVI	310153	310200	48	+	-2.71737	6.78027	74.465	2.59163e-06	2.2047e-05	Promoter	16	310210	312900	2691	1	YPL126W	YPL126W_mRNA	-10
XVI	326287	326349	63	-	2.29563	7.27845	90.0157	9.99878e-07	1.06464e-05	Promoter	16	324411	326264	1854	2	YPL119C	YPL119C_mRNA	-85
XVI	328776	328847	72	-	-1.03967	7.8996	48.3913	2.07228e-05	0.000112774	Promoter	16	327864	328730	867	2	YPL117C	YPL117C_mRNA	-117
XVI	337141	337175	35	-	7.68137	5.6045	61.6821	2.09731e-05	0.000113647	Promoter	16	335953	337143	1191	2	YPL113C	YPL113C_mRNA	0
XVI	344877	344985	109	-	2.01083	6.07666	39.6284	5.17445e-05	0.000233425	Promoter	16	341068	344739	3672	2	YPL110C	YPL110C_mRNA	-246
XVI	35081	35261	181	+	1.11444	8.07192	48.9098	1.97169e-05	0.000108655	Promoter	16	35236	37845	2610	1	YPL268W	YPL268W_mRNA	0
XVI	370894	370942	49	+	-4.07589	6.5532	70.1563	3.48084e-06	2.82767e-05	Promoter	16	370978	372921	1944	1	YPL093W	YPL093W_mRNA	-36
XVI	373629	373684	56	+	3.12588	6.74883	42.4688	3.78314e-05	0.000180833	Promoter	16	373793	375169	1377	1	YPL092W	YPL092W_mRNA	-109
XVI	378398	378483	86	-	-2.29255	9.71442	267.365	3.15939e-09	1.76336e-07	Promoter	16	377291	378395	1105	2	YPL090C	YPL090C_mRNA	-88
XVI	383292	383464	173	+	1.59728	7.63535	48.4917	2.05234e-05	0.00011221	Promoter	16	383455	384408	954	1	YPL087W	YPL087W_mRNA	0
XVI	386453	386514	62	-	-1.72413	6.24689	24.2664	0.000416019	0.00132744	Promoter	16	384773	386446	1674	2	YPL086C	YPL086C_mRNA	-68
XVI	39025	39098	74	+	-1.93831	6.63225	47.9584	2.16093e-05	0.000116317	Promoter	16	39121	40077	957	1	YPL266W	YPL266W_mRNA	-23
XVI	404907	404926	20	+	-2.22363	7.72779	80.1418	1.79633e-06	1.65548e-05	Promoter	16	404950	406044	1095	1	YPL081W	YPL081W_mRNA	-24
XVI	406589	406628	40	+	-2.67883	8.43241	104.838	4.58722e-07	5.87405e-06	Promoter	16	406636	407539	904	1	YPL079W	YPL079W_mRNA	-8
XVI	408738	408827	90	-	1.23398	8.10989	48.4722	2.05619e-05	0.000112294	Promoter	16	408010	408744	735	2	YPL078C	YPL078C_mRNA	0
XVI	40915	40971	57	+	2.688	9.63884	361.373	6.07126e-10	8.66094e-08	Promoter	16	41043	42869	1827	1	YPL265W	YPL265W_mRNA	-72
XVI	425114	425167	54	-	-2.02111	5.62552	22.4723	0.000563174	0.00171705	Promoter	16	424215	425096	882	2	YPL068C	YPL068C_mRNA	-71
XVI	426023	426075	53	+	-1.58382	5.61771	19.0198	0.00106117	0.00290911	Promoter	16	426233	427672	1440	1	YPL066W	YPL066W_mRNA	-158
XVI	455599	455823	225	+	2.35848	8.29155	84.7529	1.35605e-06	1.32287e-05	Promoter	16	455759	456664	906	1	YPL054W	YPL054W_mRNA	0
XVI	458723	458778	56	+	1.32403	5.59322	9.64326	0.00969737	0.0193868	Promoter	16	458799	459678	880	1	YPL052W	YPL052W_mRNA	-21
XVI	464444	464464	21	+	-3.30276	4.96798	27.1974	0.000262097	0.00090424	Promoter	16	464401	465648	1248	1	YPL048W	YPL048W_mRNA	43
XVI	46507	46580	74	-	-3.02397	6.41216	61.0365	6.87297e-06	4.82466e-05	Promoter	16	44551	46506	1956	2	YPL263C	YPL263C_mRNA	-74
XVI	47139	47887	749	+	1.87262	9.79078	136.625	1.15579e-07	2.04282e-06	Promoter	16	47336	48802	1467	1	YPL262W	YPL262W_mRNA	0
XVI	506397	506449	53	-	1.20465	6.21282	16.7747	0.00167163	0.00429469	Promoter	16	504339	506312	1974	2	YPL023C	YPL023C_mRNA	-137
XVI	514262	514323	62	-	1.72224	6.5462	33.3372	0.000110945	0.000433272	Promoter	16	512313	514178	1866	2	YPL020C	YPL020C_mRNA	-145
XVI	520160	520224	65	-	1.0535	5.94937	9.12004	0.0113182	0.0220386	Promoter	16	518734	520233	1500	2	YPL017C	YPL017C_mRNA	73
XVI	527513	527542	30	+	-3.70914	7.70674	248.744	4.67862e-09	2.20857e-07	Promoter	16	527547	528692	1146	1	YPL014W	YPL014W_mRNA	-5
XVI	527614	527615	2	+	-6.71559	4.46366	47.1875	6.17424e-05	0.00026777	Promoter	16	527547	528692	1146	1	YPL014W	YPL014W_mRNA	67
XVI	529565	529691	127	+	-2.67949	6.51672	50.3201	1.72585e-05	9.71991e-05	Promoter	16	529723	533409	3687	1	YPL012W	YPL012W_mRNA	-32
XVI	544541	544610	70	+	2.22177	6.57979	39.285	5.38064e-05	0.000241336	Promoter	16	544631	548143	3513	1	YPL006W	YPL006W_mRNA	-21
XVI	556299	556397	99	+	9.66663	7.37575	283.817	2.71343e-08	6.97907e-07	Promoter	16	556377	557837	1461	1	YPR001W	YPR001W_mRNA	0
XVI	558365	558383	19	+	6.74055	7.86244	182.287	2.50176e-08	6.65221e-07	Promoter	16	558385	559935	1551	1	YPR002W	YPR002W_mRNA	-2
XVI	566688	566797	110	-	7.37925	5.32784	64.205	1.77872e-05	9.97148e-05	Promoter	16	565787	566671	885	2	YPR005C	YPR005C_mRNA	-126
XVI	569000	569124	125	-	9.15467	6.9067	177.585	2.22566e-07	3.33232e-06	Promoter	16	567269	568996	1728	2	YPR006C	YPR006C_mRNA	-128
XVI	572824	572848	25	+	2.58532	6.98602	78.0131	2.0553e-06	1.83844e-05	Promoter	16	573018	575102	2085	1	YPR008W	YPR008W_mRNA	-170
XVI	581208	581262	55	-	-2.58103	6.28024	51.3174	1.57367e-05	9.09849e-05	Promoter	16	577585	581196	3612	2	YPR010C	YPR010C_mRNA	-66
XVI	582726	582825	100	-	3.21661	7.74798	244.537	5.1326e-09	2.29131e-07	Promoter	16	582373	582734	362	2	YPR010C-A	YPR010C-A_mRNA	0
XVI	593117	593199	83	-	-1.09015	7.50342	15.941	0.00199875	0.00500048	Promoter	16	592332	593069	738	2	YPR016C	YPR016C_mRNA	-130
XVI	609991	610095	105	-	1.44318	7.87086	54.2449	1.21028e-05	7.39853e-05	Promoter	16	608826	610031	1206	2	YPR023C	YPR023C_mRNA	0
XVI	615346	615390	45	+	8.48282	6.30856	86.5609	5.09431e-06	3.77305e-05	Promoter	16	615379	619014	3636	1	YPR026W	YPR026W_mRNA	0
XVI	634057	634120	64	+	1.91794	6.658	8.13326	0.0153448	0.0286728	Promoter	16	634123	637224	3102	1	YPR032W	YPR032W_mRNA	-3
XVI	638989	639020	32	-	-1.60137	5.56443	15.8307	0.00204749	0.00510379	Promoter	16	637379	639019	1641	2	YPR033C	YPR033C_mRNA	0
XVI	648597	648621	25	+	-1.16272	7.14607	29.4848	0.00018733	0.00067874	Promoter	16	648704	649921	1218	1	YPR041W	YPR041W_mRNA	-83
XVI	654085	654157	73	+	-2.00654	9.53992	203.919	1.37025e-08	4.47539e-07	Promoter	16	654166	654847	682	1	YPR043W	YPR043W_mRNA	-9
XVI	664904	664950	47	+	-1.11701	7.43674	20.9564	0.000737265	0.00215209	Promoter	16	664960	665490	531	1	YPR051W	YPR051W_mRNA	-10
XVI	66783	66805	23	-	-2.55642	5.65304	45.0535	2.88619e-05	0.000145687	Promoter	16	64977	66614	1638	2	YPL256C	YPL256C_mRNA	-191
XVI	675641	675706	66	-	-3.74321	6.2635	52.0384	1.47345e-05	8.63833e-05	Promoter	16	674861	675631	771	2	YPR060C	YPR060C_mRNA	-75
XVI	677108	677222	115	+	-1.42955	9.71178	84.7464	1.35658e-06	1.32287e-05	Promoter	16	677165	677641	477	1	YPR062W	YPR062W_mRNA	0
XVI	679504	679711	208	+	1.05105	10.1683	31.6268	0.000139156	0.000526133	Promoter	16	679693	680799	1107	1	YPR065W	YPR065W_mRNA	0
XVI	688145	688160	16	+	-1.36976	5.24138	11.3253	0.00606904	0.0129526	Promoter	16	688172	688807	636	1	YPR071W	YPR071W_mRNA	-12
XVI	694893	694951	59	-	-1.18097	7.5078	37.9549	6.27609e-05	0.00027074	Promoter	16	692796	694838	2043	2	YPR074C	YPR074C_mRNA	-113
XVI	696852	696882	31	-	1.01126	6.23341	7.3721	0.0196531	0.0355907	Promoter	16	695737	696819	1083	2	YPR075C	YPR075C_mRNA	-63
XVI	697486	697647	162	+	8.60396	6.39652	118.533	1.31861e-06	1.30414e-05	Promoter	16	697131	697502	372	2	YPR077C	YPR077C_mRNA	0
XVI	700545	700585	41	+	-1.33246	9.6065	98.073	6.46008e-07	7.44899e-06	Promoter	16	700594	701970	1377	1	YPR080W	YPR080W_mRNA	-9
XVI	709915	709952	38	-	1.07264	5.36871	6.56505	0.0259	0.0448344	Promoter	16	708497	709828	1332	2	YPR085C	YPR085C_mRNA	-124
XVI	719370	719388	19	-	-2.18583	4.63277	11.2026	0.00627165	0.0133091	Promoter	16	719148	719242	95	2	snR41	snR41_snoRNA	-146
XVI	729508	729572	65	-	1.2329	7.27492	34.4911	9.56956e-05	0.000384322	Promoter	16	728947	729528	582	2	YPR098C	YPR098C_mRNA	0
XVI	731413	731898	486	-	-2.60539	12.1863	140.972	9.80103e-08	1.79969e-06	Promoter	16	731224	731748	525	2	YPR102C	YPR102C_mRNA	0
XVI	73882	73960	79	-	-1.64123	7.57484	69.3457	3.68596e-06	2.93098e-05	Promoter	16	73363	73881	519	2	YPL252C	YPL252C_mRNA	-79
XVI	739685	739686	2	-	-3.07462	4.57977	15.1497	0.00238134	0.00581889	Promoter	16	736984	739569	2586	2	YPR105C	YPR105C_mRNA	-117
XVI	742325	742423	99	+	1.00323	8.63618	32.0834	0.000130871	0.000498294	Promoter	16	742454	743743	1290	1	YPR108W	YPR108W_mRNA	-31
XVI	744592	744632	41	+	2.72073	5.21172	16.6033	0.00173341	0.00443469	Promoter	16	744689	745573	885	1	YPR109W	YPR109W_mRNA	-57
XVI	746830	746874	45	-	-2.7024	8.29919	248.079	4.7471e-09	2.20857e-07	Promoter	16	745828	746835	1008	2	YPR110C	YPR110C_mRNA	0
XVI	751926	751994	69	-	-2.18035	8.10457	151.642	6.66624e-08	1.33489e-06	Promoter	16	749256	751919	2664	2	YPR112C	YPR112C_mRNA	-75
XVI	752210	752249	40	+	-4.97186	6.12934	58.1747	8.66384e-06	5.72802e-05	Promoter	16	752257	752919	663	1	YPR113W	YPR113W_mRNA	-8
XVI	76180	76300	121	-	-2.1249	10.2895	270.369	2.97281e-09	1.72211e-07	Promoter	16	75699	76239	541	2	YPL249C-A	YPL249C-A_mRNA	0
XVI	76338	76375	38	-	-1.76286	5.99696	26.2064	0.000305119	0.00102677	Promoter	16	75699	76239	541	2	YPL249C-A	YPL249C-A_mRNA	-136
XVI	786023	786047	25	+	2.27029	7.08567	43.1738	3.50939e-05	0.000170426	Promoter	16	786208	787428	1221	1	YPR124W	YPR124W_mRNA	-161
XVI	789890	789918	29	+	-1.95708	5.22814	17.9998	0.00129854	0.00346229	Promoter	16	790083	791120	1038	1	YPR127W	YPR127W_mRNA	-165
XVI	790016	790167	152	+	1.15759	8.4398	38.2259	6.0802e-05	0.000265497	Promoter	16	790083	791120	1038	1	YPR127W	YPR127W_mRNA	0
XVI	794910	794967	58	+	-2.07318	8.39724	193.144	1.83465e-08	5.41054e-07	Promoter	16	794965	795767	803	1	YPR132W	YPR132W_mRNA	0
XVI	810283	810325	43	-	1.31003	5.88346	10.4752	0.00765189	0.0158107	Promoter	16	808947	810269	1323	2	YPR137C-A	YPR137C-A	-56
XVI	818271	818323	53	+	-1.01208	9.02256	46.7685	2.42855e-05	0.00012733	Promoter	16	818323	819075	753	1	YPR143W	YPR143W_mRNA	0
XVI	821433	821492	60	-	-2.32665	5.85901	23.9734	0.000436633	0.00138414	Promoter	16	819765	821423	1659	2	YPR144C	YPR144C_mRNA	-69
XVI	822491	822688	198	+	-2.36254	8.61064	189.508	2.03163e-08	5.87077e-07	Promoter	16	822620	824338	1719	1	YPR145W	YPR145W_mRNA	0
XVI	82316	82406	91	-	1.83145	7.78167	55.8367	1.05449e-05	6.65517e-05	Promoter	16	79711	82356	2646	2	YPL248C	YPL248C_mRNA	0
XVI	824786	825086	301	-	1.03439	9.64806	25.3219	0.000350703	0.00114689	Promoter	16	824690	824926	237	2	YPR145C-A	YPR145C-A_mRNA	0
XVI	831648	831809	162	-	10.9227	8.55623	734.082	3.52444e-10	6.85997e-08	Promoter	16	831055	831675	621	2	YPR151C	YPR151C_mRNA	0
XVI	841197	841215	19	+	-7.36255	4.97852	72.8653	1.05229e-05	6.64993e-05	Promoter	16	841266	842669	1404	1	YPR157W	YPR157W_mRNA	-51
XVI	85302	85374	73	-	-1.30202	6.62251	21.4728	0.000671638	0.00199158	Promoter	16	84509	85297	789	2	YPL246C	YPL246C_mRNA	-77
XVI	857283	857343	61	+	-1.01356	6.58487	10.4412	0.00772468	0.0159272	Promoter	16	857583	859745	2163	1	YPR159W	YPR159W_mRNA	-240
XVI	870016	870056	41	-	-1.40521	6.89409	33.3124	0.000111303	0.000433821	Promoter	16	868645	869955	1311	2	YPR163C	YPR163C_mRNA	-101
XVI	878624	878679	56	+	-2.83364	6.24331	30.0251	0.000173537	0.000635869	Promoter	16	878690	880168	1479	1	YPR169W	YPR169W_mRNA	-11
XVI	887831	887895	65	-	1.12294	6.85844	19.9475	0.000888655	0.00251846	Promoter	16	886524	887837	1314	2	YPR173C	YPR173C_mRNA	0
XVI	911213	911257	45	+	-1.18842	8.69815	45.5421	2.74616e-05	0.000141107	Promoter	16	911257	911800	544	1	YPR187W	YPR187W_mRNA	0
XVI	919035	919102	68	-	-1.27981	8.08679	56.4168	1.00367e-05	6.4543e-05	Promoter	16	917077	919041	1965	2	YPR190C	YPR190C_mRNA	0
XVI	923364	923436	73	-	7.32184	5.26907	56.0072	3.10832e-05	0.000155205	Promoter	16	922909	923379	471	2	YPR193C	YPR193C_mRNA	0
XVI	96266	96266	1	-	-2.24017	4.66192	12.8483	0.00410112	0.00923479	Promoter	16	95372	96258	887	2	YPL241C	YPL241C_mRNA	-8
XVI	98643	98723	81	-	1.30299	8.92333	87.8497	1.13123e-06	1.17619e-05	Promoter	16	96496	98625	2130	2	YPL240C	YPL240C_mRNA	-98
XVI	99360	99512	153	+	-1.49654	9.30541	98.6719	6.2619e-07	7.36e-06	Promoter	16	99484	100086	603	1	YPL239W	YPL239W_mRNA	0
