# Supplementary figures and images for: Simple and efficient profiling of transcription initiation and transcript levels with STRIPE-seq
Source: HighWire-hosted journal article supplement (doi:10.1101/gr.261545.120), 2020-06-01

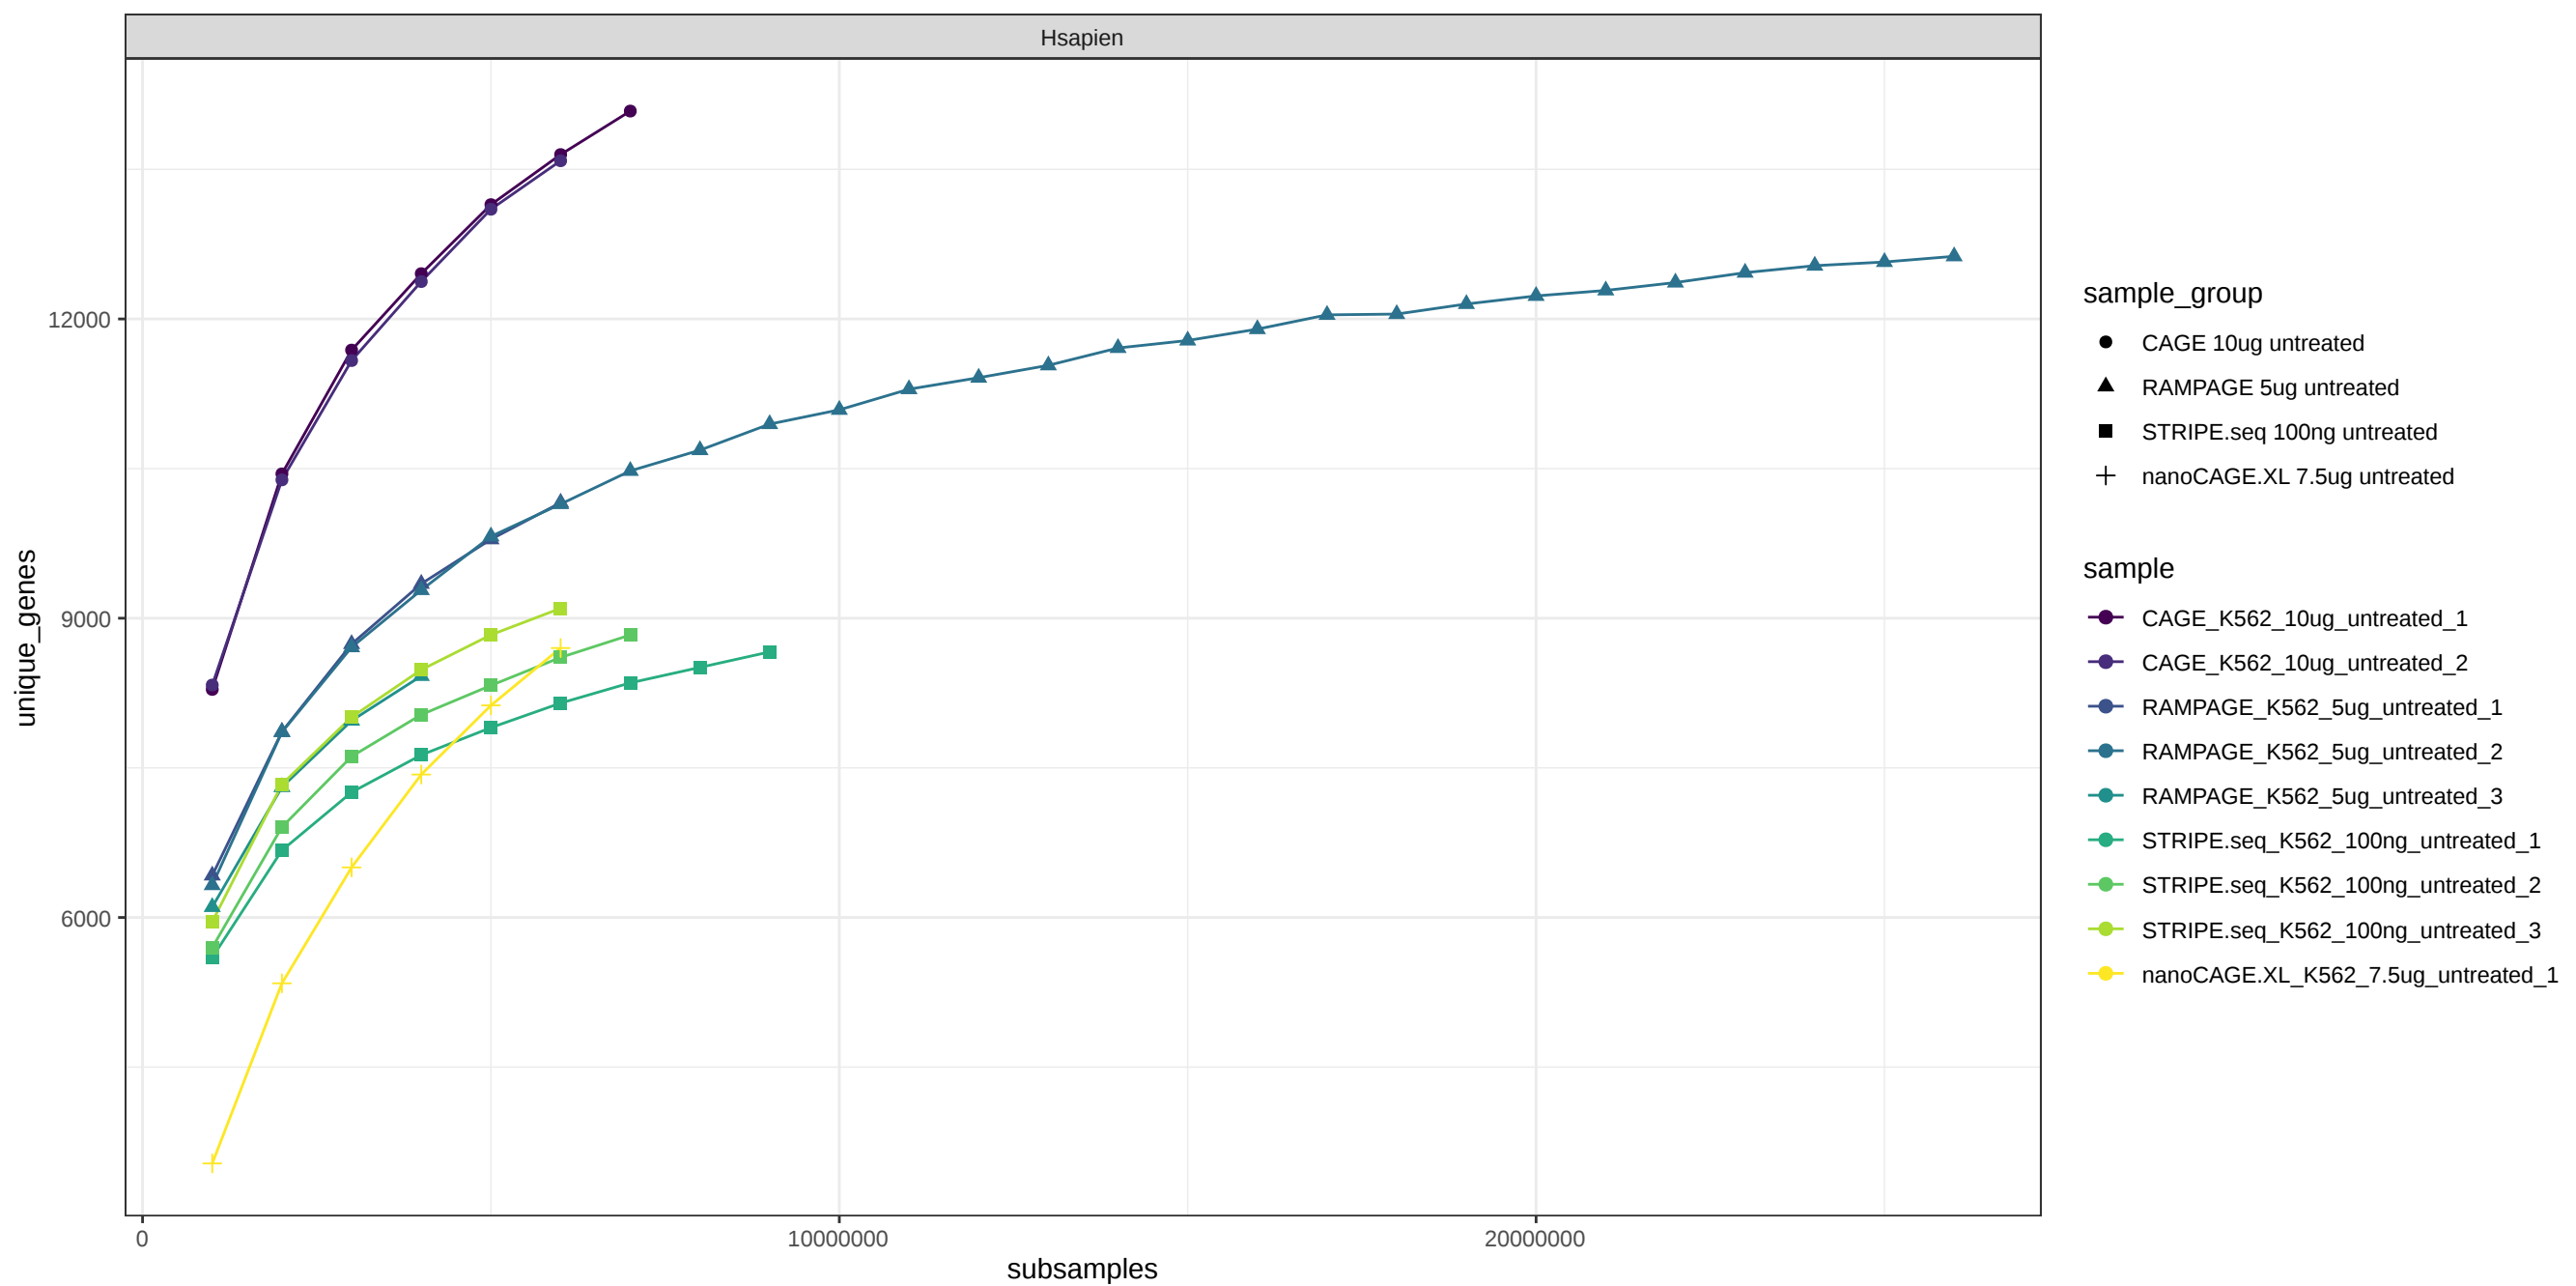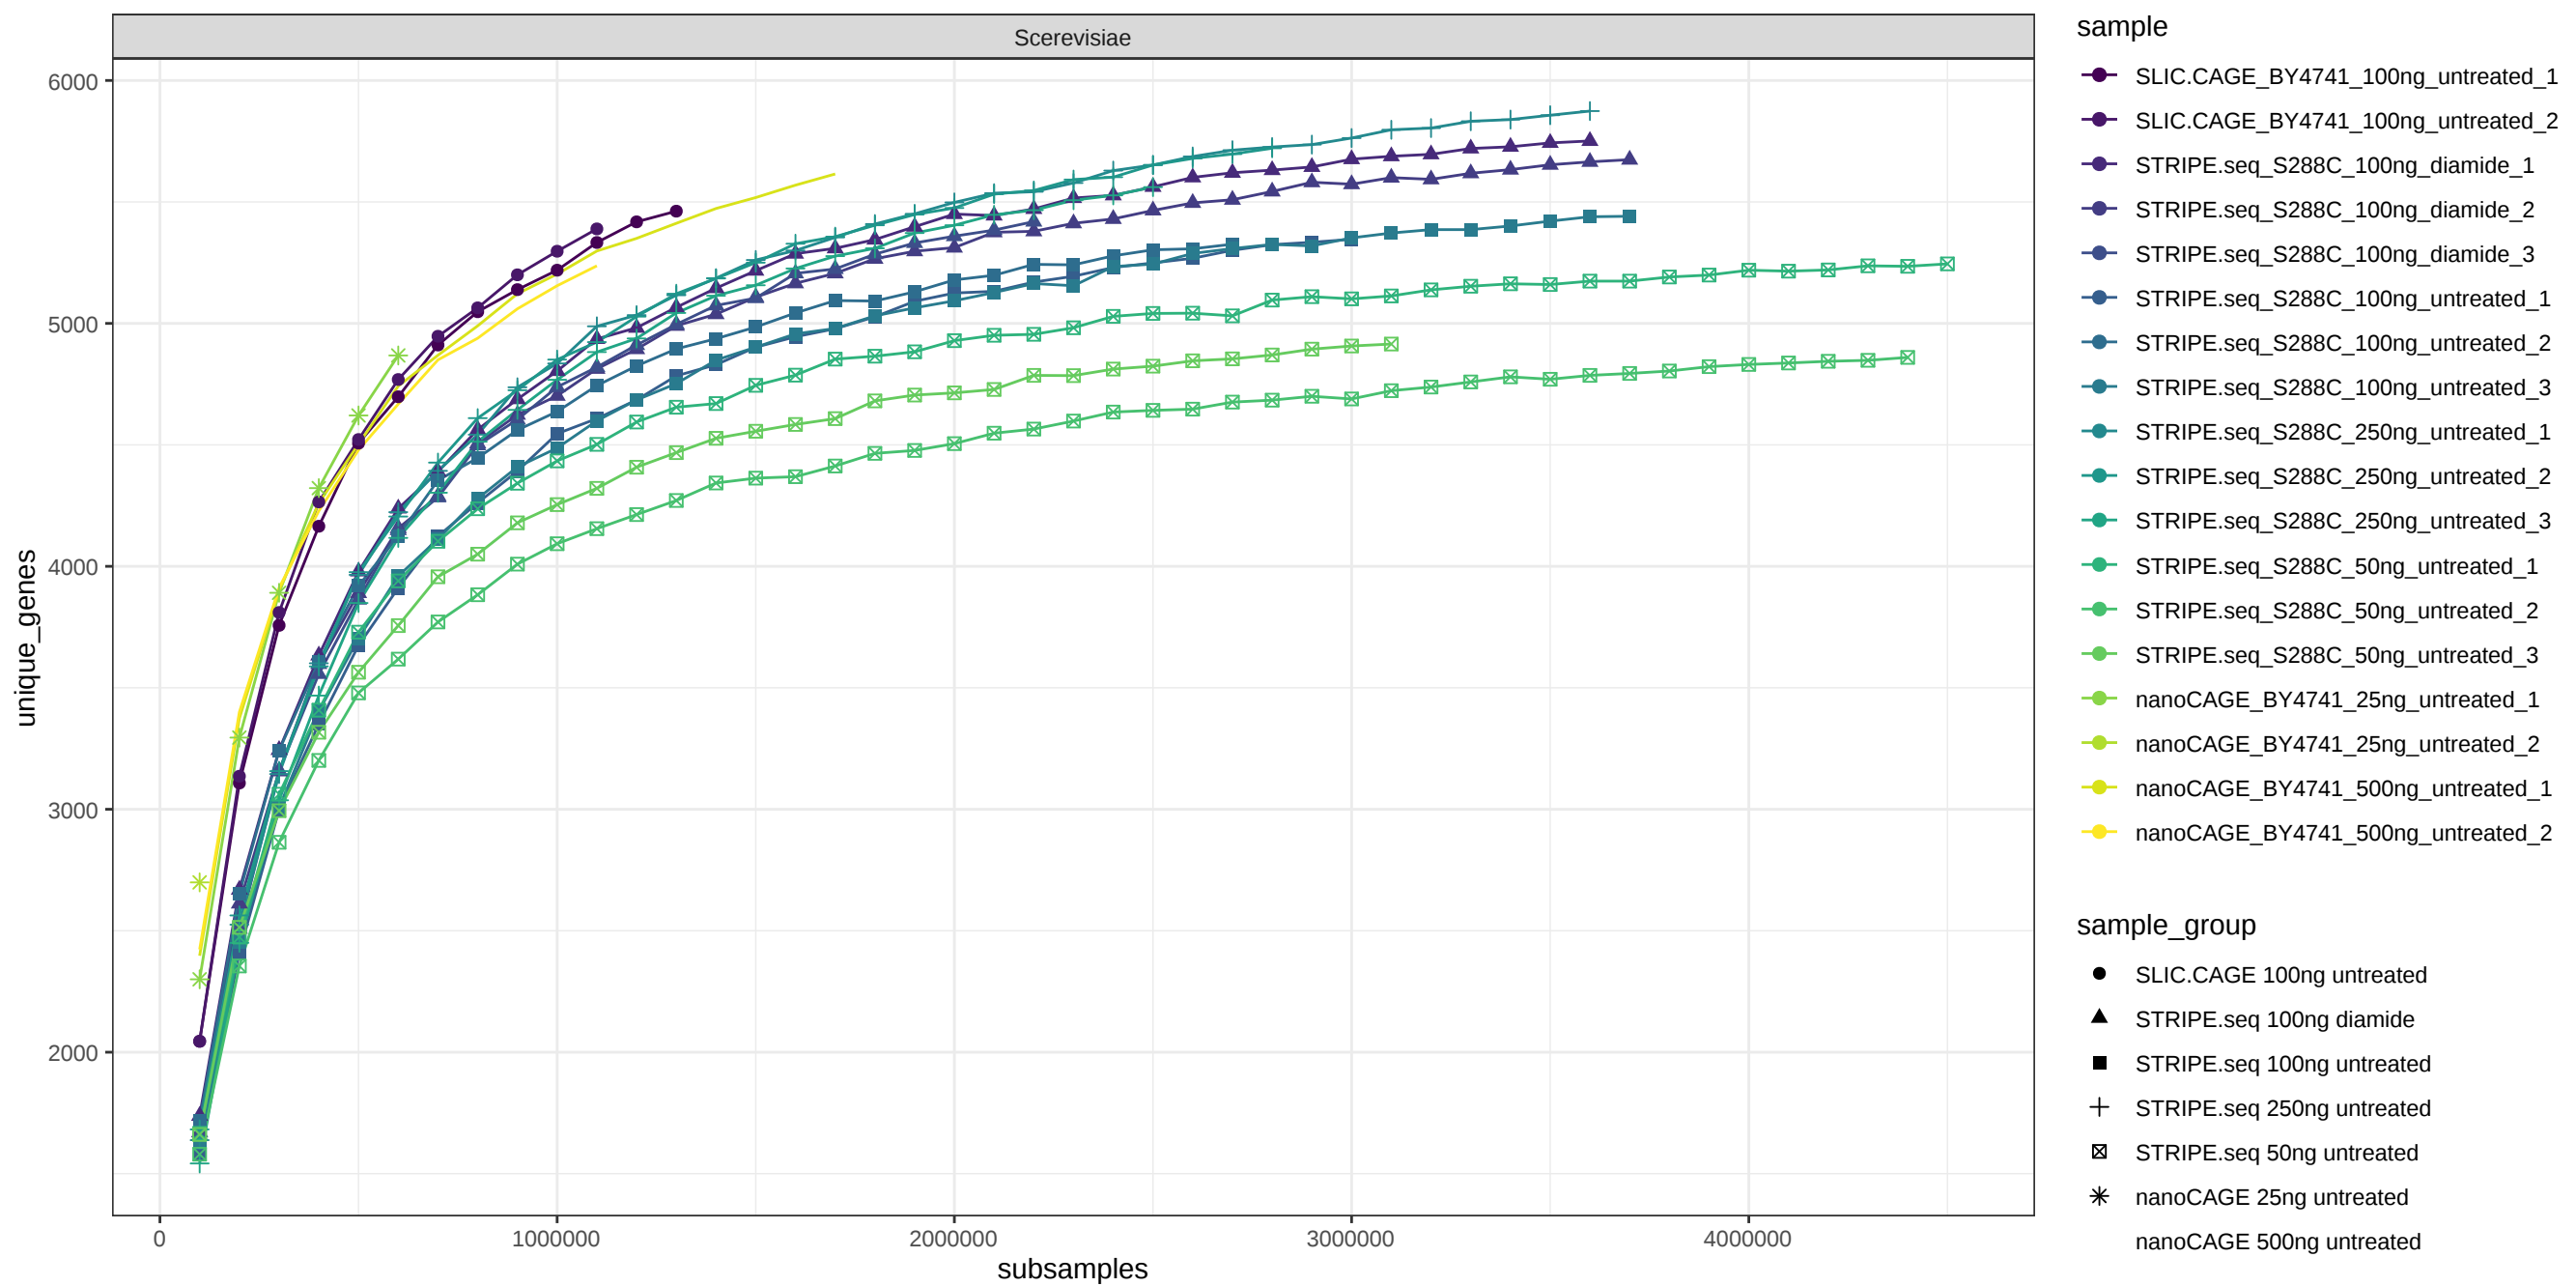

Supplement: Supplemental_Code.zip [file saturation_plot.pdf › saturation/saturation_plot.pdf]

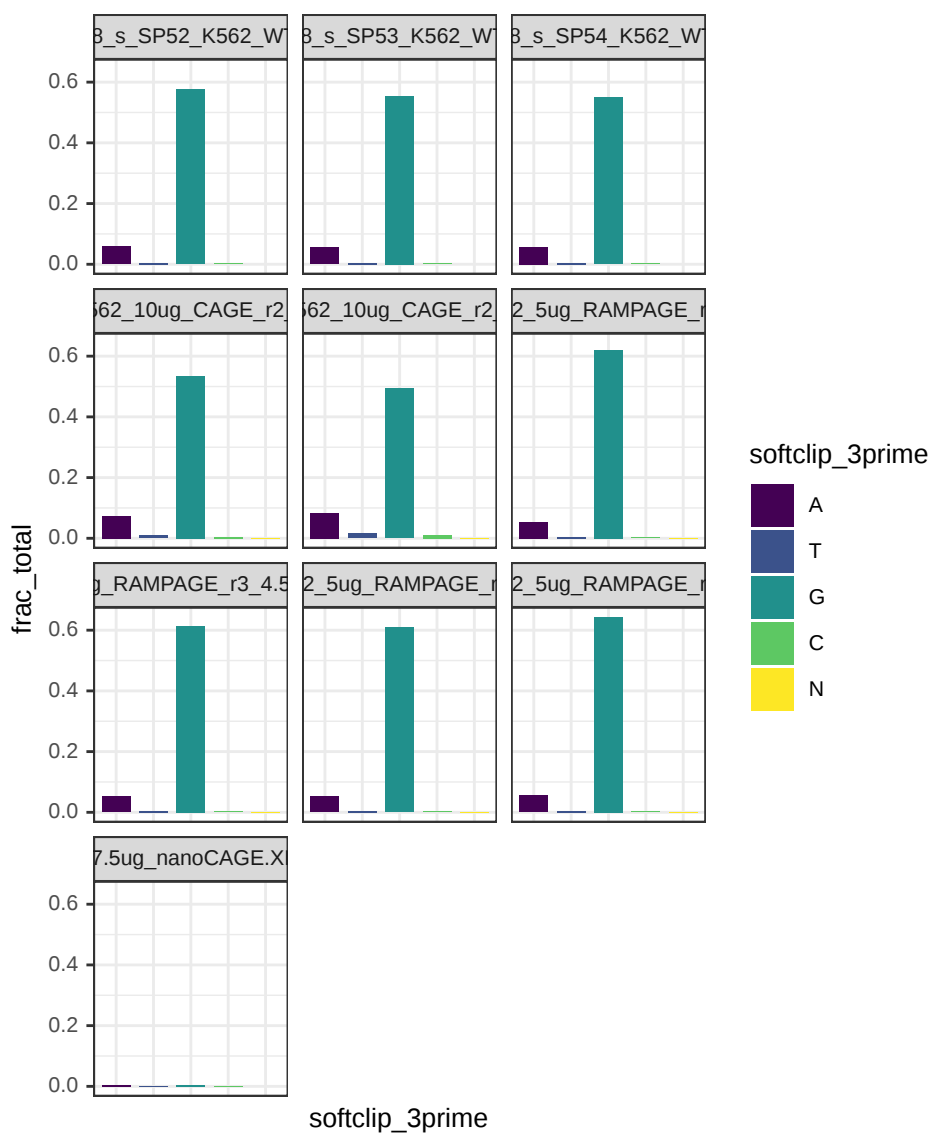

Supplement: Supplemental_Code.zip [file human_softclip_base.pdf › softclip/human_softclip_base.pdf]

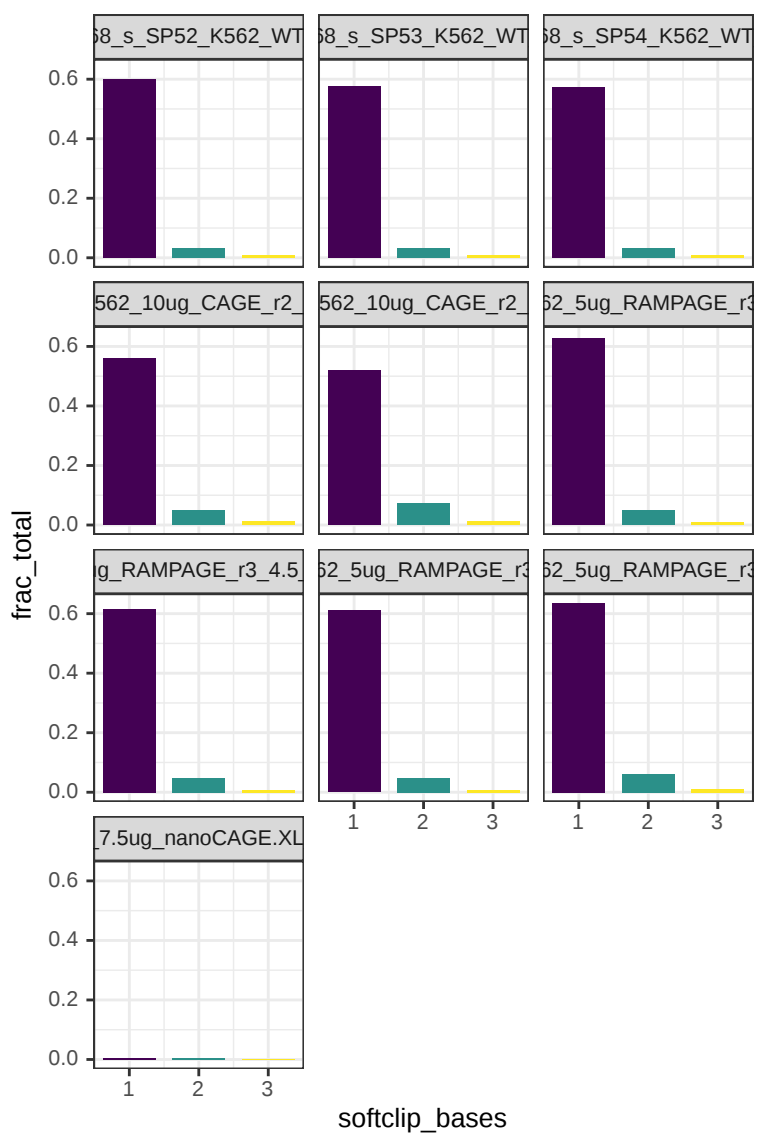

Supplement: Supplemental_Code.zip [file human_softclip_lengths.pdf › softclip/human_softclip_lengths.pdf]

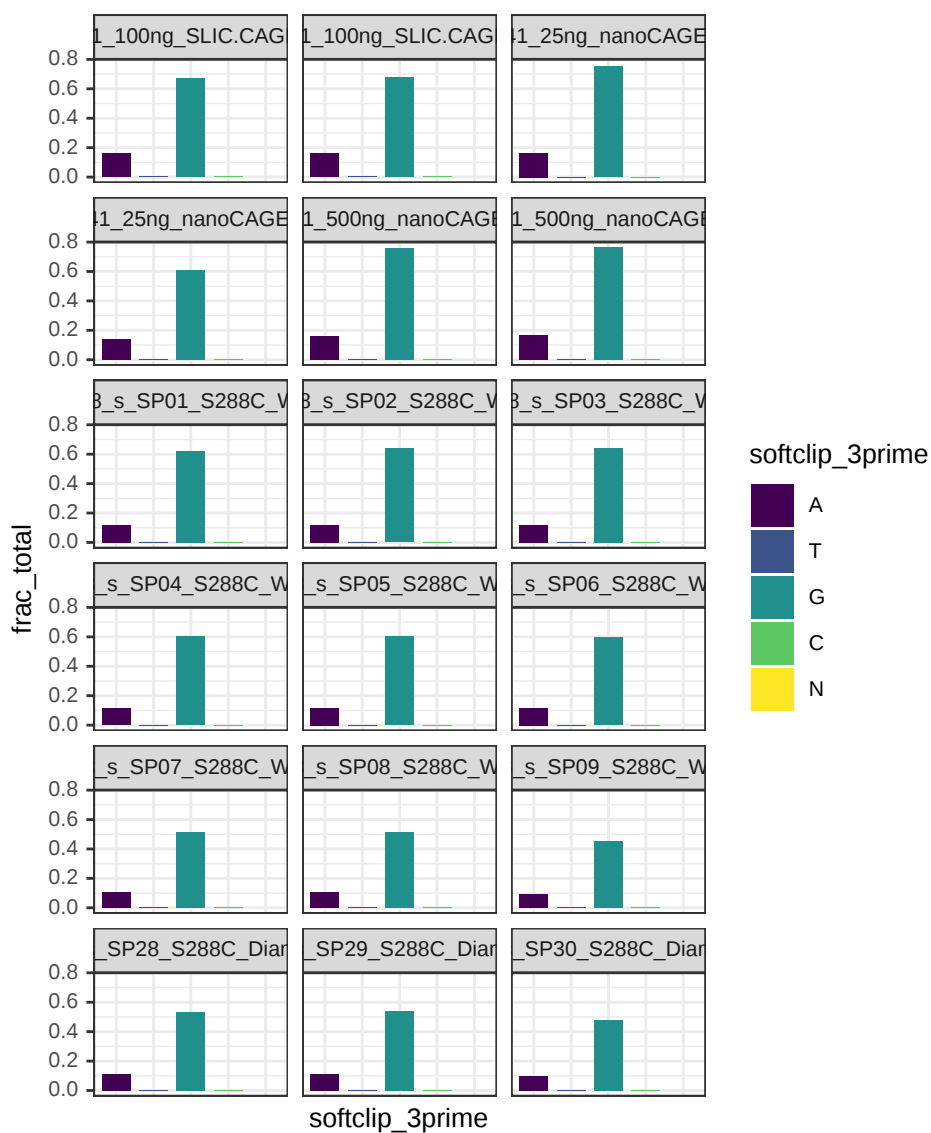

Supplement: Supplemental_Code.zip [file yeast_softclip_base.pdf › softclip/yeast_softclip_base.pdf]

frac\_total

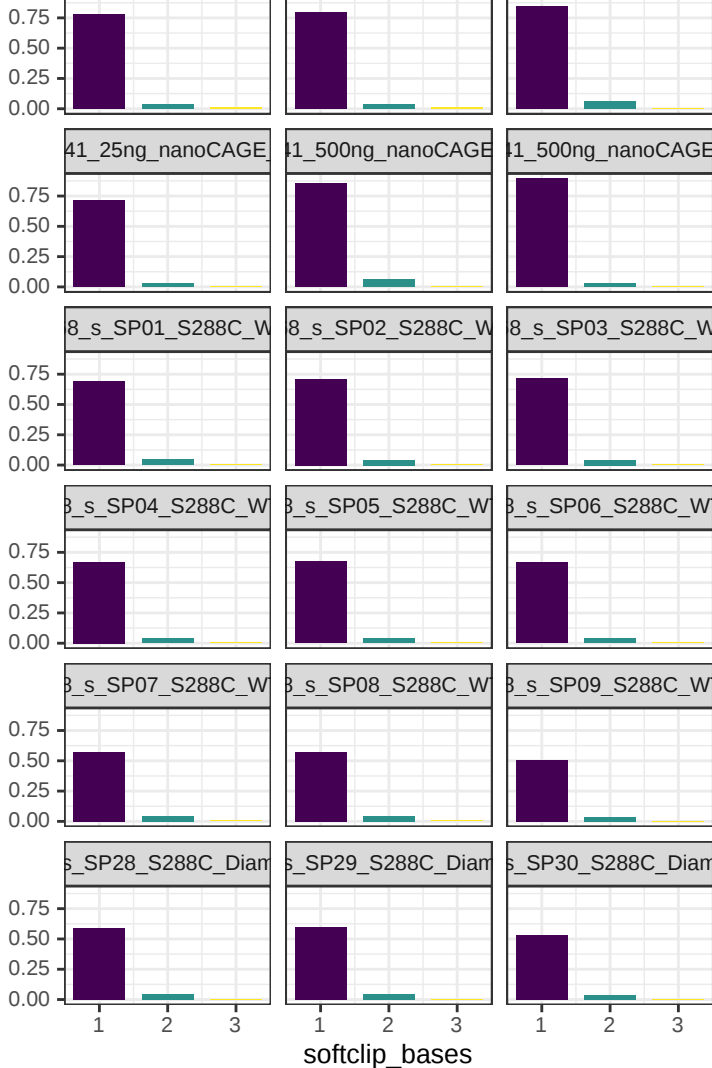

Supplement: Supplemental_Code.zip [file yeast_softclip_lengths.pdf › softclip/yeast_softclip_lengths.pdf]
